# Supplementary material
Source: publisher figshare collection journal article supplement (https://acs.figshare.com/ndownloader/files/10715590)
Supplement: Supplementary file 1 [file 10715590]

 
data_1_a
 
_audit_creation_method            'SHELXL-2014/7'
_shelx_SHELXL_version_number      '2014/7'
_chemical_name_systematic         ?
_chemical_name_common             ?
_chemical_melting_point           ?
_chemical_formula_moiety          ?
_chemical_formula_sum
 'C42 H36 N2 O2 S' 
_chemical_formula_weight          632.79

loop_
 _atom_type_symbol
 _atom_type_description
 _atom_type_scat_dispersion_real
 _atom_type_scat_dispersion_imag
 _atom_type_scat_source
 'C'  'C'   0.0033   0.0016
 'International Tables Vol C Tables 4.2.6.8 and 6.1.1.4'
 'H'  'H'   0.0000   0.0000
 'International Tables Vol C Tables 4.2.6.8 and 6.1.1.4'
 'N'  'N'   0.0061   0.0033
 'International Tables Vol C Tables 4.2.6.8 and 6.1.1.4'
 'O'  'O'   0.0106   0.0060
 'International Tables Vol C Tables 4.2.6.8 and 6.1.1.4'
 'S'  'S'   0.1246   0.1234
 'International Tables Vol C Tables 4.2.6.8 and 6.1.1.4'
 
_space_group_crystal_system       monoclinic
_space_group_IT_number            14
_space_group_name_H-M_alt         'P 21/n'
_space_group_name_Hall            '-P 2yn'
 
_shelx_space_group_comment
;
The symmetry employed for this shelxl refinement is uniquely defined
by the following loop, which should always be used as a source of
symmetry information in preference to the above space-group names.
They are only intended as comments.
;
 
loop_
 _space_group_symop_operation_xyz
 'x, y, z'
 '-x+1/2, y+1/2, -z+1/2'
 '-x, -y, -z'
 'x-1/2, -y-1/2, z-1/2'
 
_cell_length_a                    11.9209(13)
_cell_length_b                    13.8313(16)
_cell_length_c                    20.229(2)
_cell_angle_alpha                 90
_cell_angle_beta                  94.709(4)
_cell_angle_gamma                 90
_cell_volume                      3324.1(7)
_cell_formula_units_Z             4
_cell_measurement_temperature     296(2)
_cell_measurement_reflns_used     1681
_cell_measurement_theta_min       2.26
_cell_measurement_theta_max       19.32
 
_exptl_crystal_description        Block
_exptl_crystal_colour             colorless
_exptl_crystal_density_meas       ?
_exptl_crystal_density_method     ?
_exptl_crystal_density_diffrn     1.264          
_exptl_crystal_F_000              1336
_exptl_transmission_factor_min    0.864
_exptl_transmission_factor_max    0.864
_exptl_crystal_size_max           0.220
_exptl_crystal_size_mid           0.200
_exptl_crystal_size_min           0.180
_exptl_absorpt_coefficient_mu     0.137
_shelx_estimated_absorpt_T_min    0.970
_shelx_estimated_absorpt_T_max    0.976
_exptl_absorpt_correction_type    multi-scan
_exptl_absorpt_correction_T_min   ?
_exptl_absorpt_correction_T_max   ?
_exptl_absorpt_process_details    sadabs
_exptl_absorpt_special_details    ?
_diffrn_ambient_temperature       296(2)
_diffrn_radiation_wavelength      0.71073
_diffrn_radiation_type            MoK\a
_diffrn_source                    ?
_diffrn_measurement_device_type   CCD
_diffrn_measurement_method        ?
_diffrn_detector_area_resol_mean  ?
_diffrn_reflns_number             21353
_diffrn_reflns_av_unetI/netI      0.0771
_diffrn_reflns_av_R_equivalents   0.0746
_diffrn_reflns_limit_h_min        -14
_diffrn_reflns_limit_h_max        14
_diffrn_reflns_limit_k_min        -16
_diffrn_reflns_limit_k_max        11
_diffrn_reflns_limit_l_min        -24
_diffrn_reflns_limit_l_max        24
_diffrn_reflns_theta_min          1.786
_diffrn_reflns_theta_max          25.525
_diffrn_reflns_theta_full         25.242
_diffrn_measured_fraction_theta_max   0.981
_diffrn_measured_fraction_theta_full  0.997
_diffrn_reflns_Laue_measured_fraction_max    0.981
_diffrn_reflns_Laue_measured_fraction_full   0.997
_diffrn_reflns_point_group_measured_fraction_max   0.981
_diffrn_reflns_point_group_measured_fraction_full  0.997
_reflns_number_total              6092
_reflns_number_gt                 3300
_reflns_threshold_expression      'I > 2\s(I)'
_reflns_Friedel_coverage          0.000
_reflns_Friedel_fraction_max      .
_reflns_Friedel_fraction_full     .
 
_reflns_special_details
;
 Reflections were merged by SHELXL according to the crystal
 class for the calculation of statistics and refinement.
 
 _reflns_Friedel_fraction is defined as the number of unique
 Friedel pairs measured divided by the number that would be
 possible theoretically, ignoring centric projections and
 systematic absences.
;
 
_computing_data_collection        ?
_computing_cell_refinement        ?
_computing_data_reduction         ?
_computing_structure_solution     ?
_computing_structure_refinement 'SHELXL-2014/7 (Sheldrick, 2014)'
_computing_molecular_graphics     ?
_computing_publication_material   ?
_refine_special_details           ?
_refine_ls_structure_factor_coef  Fsqd
_refine_ls_matrix_type            full
_refine_ls_weighting_scheme       calc
_refine_ls_weighting_details
'w=1/[\s^2^(Fo^2^)+(0.0649P)^2^] where P=(Fo^2^+2Fc^2^)/3'
_atom_sites_solution_primary      ?
_atom_sites_solution_secondary    ?
_atom_sites_solution_hydrogens    geom
_refine_ls_hydrogen_treatment     constr
_refine_ls_extinction_method      none
_refine_ls_extinction_coef        .
_refine_ls_number_reflns          6092
_refine_ls_number_parameters      428
_refine_ls_number_restraints      0
_refine_ls_R_factor_all           0.1121
_refine_ls_R_factor_gt            0.0539
_refine_ls_wR_factor_ref          0.1507
_refine_ls_wR_factor_gt           0.1195
_refine_ls_goodness_of_fit_ref    0.960
_refine_ls_restrained_S_all       0.960
_refine_ls_shift/su_max           0.000
_refine_ls_shift/su_mean          0.000
 
loop_
 _atom_site_label
 _atom_site_type_symbol
 _atom_site_fract_x
 _atom_site_fract_y
 _atom_site_fract_z
 _atom_site_U_iso_or_equiv
 _atom_site_adp_type
 _atom_site_occupancy
 _atom_site_site_symmetry_order  
 _atom_site_calc_flag
 _atom_site_refinement_flags_posn
 _atom_site_refinement_flags_adp
 _atom_site_refinement_flags_occupancy
 _atom_site_disorder_assembly
 _atom_site_disorder_group
C1 C 0.7550(3) 0.4507(2) 0.91076(15) 0.0599(8) Uani 1 1 d . . . . .
C2 C 0.7898(3) 0.4296(3) 0.97644(19) 0.0854(11) Uani 1 1 d . . . . .
H2 H 0.8647 0.4395 0.9915 0.102 Uiso 1 1 calc R U . . .
C3 C 0.7173(4) 0.3949(3) 1.01962(19) 0.1034(14) Uani 1 1 d . . . . .
H3 H 0.7435 0.3813 1.0632 0.124 Uiso 1 1 calc R U . . .
C4 C 0.6061(4) 0.3798(3) 0.9992(2) 0.0967(13) Uani 1 1 d . . . . .
H4 H 0.5570 0.3551 1.0285 0.116 Uiso 1 1 calc R U . . .
C5 C 0.5685(3) 0.4014(3) 0.93541(17) 0.0754(10) Uani 1 1 d . . . . .
H5 H 0.4931 0.3918 0.9213 0.090 Uiso 1 1 calc R U . . .
C6 C 0.6411(2) 0.4376(2) 0.89116(15) 0.0556(8) Uani 1 1 d . . . . .
C7 C 0.6633(3) 0.5234(2) 0.78767(14) 0.0547(8) Uani 1 1 d . . . . .
C8 C 0.6100(3) 0.5706(2) 0.73267(16) 0.0679(9) Uani 1 1 d . . . . .
H8 H 0.5337 0.5606 0.7213 0.081 Uiso 1 1 calc R U . . .
C9 C 0.6700(4) 0.6315(3) 0.69537(17) 0.0790(11) Uani 1 1 d . . . . .
H9 H 0.6348 0.6616 0.6581 0.095 Uiso 1 1 calc R U . . .
C10 C 0.7828(4) 0.6481(3) 0.7131(2) 0.0872(11) Uani 1 1 d . . . . .
H10 H 0.8233 0.6905 0.6885 0.105 Uiso 1 1 calc R U . . .
C11 C 0.8342(3) 0.6017(3) 0.76691(19) 0.0767(10) Uani 1 1 d . . . . .
H11 H 0.9103 0.6131 0.7781 0.092 Uiso 1 1 calc R U . . .
C12 C 0.7775(2) 0.5382(2) 0.80567(15) 0.0559(8) Uani 1 1 d . . . . .
C13 C 0.8370(2) 0.4799(2) 0.86070(16) 0.0625(9) Uani 1 1 d . . . . .
C14 C 0.8824(3) 0.3860(3) 0.83036(19) 0.0957(13) Uani 1 1 d . . . . .
H14A H 0.8212 0.3510 0.8078 0.144 Uiso 1 1 calc R U . . .
H14B H 0.9179 0.3465 0.8651 0.144 Uiso 1 1 calc R U . . .
H14C H 0.9364 0.4025 0.7995 0.144 Uiso 1 1 calc R U . . .
C15 C 0.9376(3) 0.5352(3) 0.8949(2) 0.1141(16) Uani 1 1 d . . . . .
H15A H 0.9861 0.5565 0.8622 0.171 Uiso 1 1 calc R U . . .
H15B H 0.9787 0.4935 0.9261 0.171 Uiso 1 1 calc R U . . .
H15C H 0.9107 0.5903 0.9178 0.171 Uiso 1 1 calc R U . . .
C16 C 0.4852(2) 0.4444(2) 0.80521(15) 0.0580(8) Uani 1 1 d . . . . .
C17 C 0.4033(3) 0.5072(3) 0.82425(17) 0.0778(10) Uani 1 1 d . . . . .
H17 H 0.4238 0.5603 0.8507 0.093 Uiso 1 1 calc R U . . .
C18 C 0.2912(3) 0.4913(3) 0.80417(17) 0.0799(11) Uani 1 1 d . . . . .
H18 H 0.2365 0.5327 0.8182 0.096 Uiso 1 1 calc R U . . .
C19 C 0.2603(2) 0.4150(2) 0.76379(16) 0.0618(9) Uani 1 1 d . . . . .
H19 H 0.1850 0.4044 0.7500 0.074 Uiso 1 1 calc R U . . .
C20 C 0.3426(2) 0.3540(2) 0.74381(13) 0.0466(7) Uani 1 1 d . . . . .
C21 C 0.4548(2) 0.3674(2) 0.76502(14) 0.0511(7) Uani 1 1 d . . . . .
H21 H 0.5091 0.3246 0.7521 0.061 Uiso 1 1 calc R U . . .
C22 C 0.3391(2) 0.3150(2) 0.61058(13) 0.0484(7) Uani 1 1 d . . . . .
C23 C 0.4342(2) 0.2848(2) 0.58189(16) 0.0615(9) Uani 1 1 d . . . . .
H23 H 0.4795 0.2362 0.6016 0.074 Uiso 1 1 calc R U . . .
C24 C 0.4610(3) 0.3272(3) 0.52401(18) 0.0733(10) Uani 1 1 d . . . . .
H24 H 0.5241 0.3064 0.5038 0.088 Uiso 1 1 calc R U . . .
C25 C 0.3952(3) 0.4006(3) 0.49554(15) 0.0649(9) Uani 1 1 d . . . . .
H25 H 0.4147 0.4294 0.4565 0.078 Uiso 1 1 calc R U . . .
C26 C 0.3006(2) 0.4318(2) 0.52454(14) 0.0509(7) Uani 1 1 d . . . . .
C27 C 0.2706(2) 0.3882(2) 0.58196(14) 0.0498(7) Uani 1 1 d . . . . .
H27 H 0.2060 0.4073 0.6012 0.060 Uiso 1 1 calc R U . . .
C28 C 0.2521(2) 0.6044(2) 0.51667(14) 0.0524(8) Uani 1 1 d . . . . .
C29 C 0.3062(2) 0.6237(3) 0.57977(15) 0.0644(9) Uani 1 1 d . . . . .
H29 H 0.3341 0.5732 0.6066 0.077 Uiso 1 1 calc R U . . .
C30 C 0.3177(3) 0.7180(3) 0.60164(18) 0.0778(10) Uani 1 1 d . . . . .
H30 H 0.3539 0.7308 0.6432 0.093 Uiso 1 1 calc R U . . .
C31 C 0.2756(3) 0.7934(3) 0.5623(2) 0.0842(11) Uani 1 1 d . . . . .
H31 H 0.2818 0.8568 0.5774 0.101 Uiso 1 1 calc R U . . .
C32 C 0.2243(3) 0.7734(3) 0.50012(18) 0.0728(10) Uani 1 1 d . . . . .
H32 H 0.1965 0.8245 0.4738 0.087 Uiso 1 1 calc R U . . .
C33 C 0.2124(2) 0.6803(2) 0.47541(15) 0.0529(8) Uani 1 1 d . . . . .
C34 C 0.1675(2) 0.6564(2) 0.40477(14) 0.0534(8) Uani 1 1 d . . . . .
C35 C 0.1030(2) 0.5617(2) 0.40527(13) 0.0495(7) Uani 1 1 d . . . . .
C36 C 0.1435(2) 0.4881(2) 0.44807(14) 0.0510(7) Uani 1 1 d . . . . .
C37 C 0.0935(2) 0.3978(2) 0.44568(15) 0.0609(8) Uani 1 1 d . . . . .
H37 H 0.1213 0.3492 0.4743 0.073 Uiso 1 1 calc R U . . .
C38 C 0.0025(2) 0.3795(3) 0.40098(16) 0.0679(9) Uani 1 1 d . . . . .
H38 H -0.0307 0.3187 0.3993 0.081 Uiso 1 1 calc R U . . .
C39 C -0.0392(2) 0.4514(3) 0.35884(16) 0.0668(9) Uani 1 1 d . . . . .
H39 H -0.1008 0.4394 0.3287 0.080 Uiso 1 1 calc R U . . .
C40 C 0.0107(2) 0.5405(3) 0.36149(15) 0.0617(9) Uani 1 1 d . . . . .
H40 H -0.0184 0.5886 0.3329 0.074 Uiso 1 1 calc R U . . .
C41 C 0.2697(2) 0.6411(2) 0.36328(15) 0.0668(9) Uani 1 1 d . . . . .
H41A H 0.3193 0.5937 0.3846 0.100 Uiso 1 1 calc R U . . .
H41B H 0.3093 0.7011 0.3599 0.100 Uiso 1 1 calc R U . . .
H41C H 0.2438 0.6189 0.3197 0.100 Uiso 1 1 calc R U . . .
C42 C 0.0960(3) 0.7382(2) 0.37271(17) 0.0802(10) Uani 1 1 d . . . . .
H42A H 0.0740 0.7220 0.3273 0.120 Uiso 1 1 calc R U . . .
H42B H 0.1391 0.7969 0.3744 0.120 Uiso 1 1 calc R U . . .
H42C H 0.0301 0.7469 0.3963 0.120 Uiso 1 1 calc R U . . .
N1 N 0.60174(19) 0.45998(19) 0.82567(12) 0.0618(7) Uani 1 1 d . . . . .
N2 N 0.23558(19) 0.50928(18) 0.49440(11) 0.0545(6) Uani 1 1 d . . . . .
O1 O 0.37916(15) 0.18123(14) 0.69901(10) 0.0618(6) Uani 1 1 d . . . . .
O2 O 0.18587(14) 0.24841(15) 0.68334(10) 0.0626(6) Uani 1 1 d . . . . .
S1 S 0.30528(6) 0.26243(5) 0.68579(4) 0.0504(2) Uani 1 1 d . . . . .
 
loop_
 _atom_site_aniso_label
 _atom_site_aniso_U_11
 _atom_site_aniso_U_22
 _atom_site_aniso_U_33
 _atom_site_aniso_U_23
 _atom_site_aniso_U_13
 _atom_site_aniso_U_12
C1 0.0605(19) 0.050(2) 0.067(2) -0.0030(17) -0.0102(16) -0.0021(16)
C2 0.080(3) 0.094(3) 0.078(3) 0.011(2) -0.019(2) 0.004(2)
C3 0.119(4) 0.120(4) 0.069(3) 0.033(3) -0.003(3) 0.024(3)
C4 0.102(3) 0.106(3) 0.083(3) 0.032(3) 0.007(2) 0.012(3)
C5 0.071(2) 0.079(3) 0.076(2) 0.013(2) -0.0001(19) -0.0025(19)
C6 0.0575(19) 0.0498(19) 0.0579(19) 0.0020(16) -0.0049(15) -0.0067(15)
C7 0.069(2) 0.0407(18) 0.0546(18) -0.0064(15) 0.0030(16) -0.0054(16)
C8 0.082(2) 0.055(2) 0.064(2) 0.0000(19) -0.0020(18) -0.0034(18)
C9 0.116(3) 0.060(2) 0.060(2) 0.0013(19) 0.004(2) 0.006(2)
C10 0.105(3) 0.072(3) 0.089(3) 0.009(2) 0.035(2) -0.008(2)
C11 0.073(2) 0.066(2) 0.093(3) -0.001(2) 0.019(2) -0.0046(19)
C12 0.0595(19) 0.0429(18) 0.066(2) -0.0096(16) 0.0078(16) -0.0068(15)
C13 0.0529(18) 0.056(2) 0.076(2) -0.0036(18) -0.0084(17) -0.0067(16)
C14 0.095(3) 0.081(3) 0.110(3) -0.007(2) 0.002(2) 0.036(2)
C15 0.097(3) 0.129(4) 0.110(3) 0.007(3) -0.032(2) -0.058(3)
C16 0.0532(18) 0.057(2) 0.0623(19) 0.0033(17) -0.0058(15) -0.0044(16)
C17 0.083(2) 0.062(2) 0.086(2) -0.021(2) -0.008(2) 0.004(2)
C18 0.068(2) 0.075(3) 0.094(3) -0.020(2) -0.007(2) 0.0226(19)
C19 0.0482(17) 0.060(2) 0.075(2) 0.0041(19) -0.0086(16) 0.0101(16)
C20 0.0440(16) 0.0441(17) 0.0503(17) 0.0066(14) -0.0047(13) 0.0010(14)
C21 0.0477(16) 0.0477(18) 0.0565(18) -0.0015(15) -0.0047(14) -0.0013(14)
C22 0.0419(15) 0.0462(18) 0.0556(17) 0.0021(15) -0.0057(13) 0.0009(14)
C23 0.0445(17) 0.060(2) 0.080(2) 0.0082(19) 0.0042(16) 0.0098(15)
C24 0.0542(19) 0.080(3) 0.087(3) 0.007(2) 0.0177(18) 0.0157(18)
C25 0.064(2) 0.074(2) 0.0575(19) 0.0078(18) 0.0097(16) 0.0024(18)
C26 0.0473(17) 0.0509(19) 0.0532(18) 0.0027(16) -0.0037(14) 0.0039(14)
C27 0.0387(15) 0.0543(19) 0.0553(18) 0.0001(16) -0.0017(13) 0.0034(14)
C28 0.0497(17) 0.056(2) 0.0520(18) -0.0041(16) 0.0067(14) -0.0012(15)
C29 0.064(2) 0.070(2) 0.058(2) 0.0014(18) 0.0026(16) -0.0074(18)
C30 0.081(2) 0.083(3) 0.070(2) -0.019(2) 0.0069(18) -0.010(2)
C31 0.088(3) 0.065(3) 0.100(3) -0.022(2) 0.013(2) -0.003(2)
C32 0.073(2) 0.059(2) 0.087(3) -0.004(2) 0.0055(19) 0.0074(18)
C33 0.0483(16) 0.0502(19) 0.0611(19) 0.0018(17) 0.0100(14) 0.0062(14)
C34 0.0474(16) 0.055(2) 0.0577(18) 0.0100(16) 0.0030(14) 0.0061(15)
C35 0.0410(15) 0.060(2) 0.0480(16) 0.0055(16) 0.0052(13) 0.0086(15)
C36 0.0434(16) 0.059(2) 0.0504(17) 0.0004(16) 0.0038(13) 0.0016(15)
C37 0.0584(19) 0.061(2) 0.062(2) 0.0082(17) 0.0009(15) -0.0037(17)
C38 0.0536(18) 0.067(2) 0.082(2) -0.005(2) -0.0010(17) -0.0085(17)
C39 0.0445(17) 0.082(3) 0.072(2) 0.000(2) -0.0056(16) -0.0001(18)
C40 0.0452(17) 0.077(2) 0.062(2) 0.0084(18) -0.0013(15) 0.0088(17)
C41 0.0606(19) 0.079(2) 0.062(2) 0.0110(18) 0.0118(15) -0.0075(17)
C42 0.079(2) 0.062(2) 0.097(3) 0.019(2) -0.0117(19) 0.0073(19)
N1 0.0554(15) 0.0654(18) 0.0616(16) 0.0032(14) -0.0137(13) -0.0178(13)
N2 0.0575(14) 0.0500(16) 0.0534(14) 0.0059(13) -0.0100(12) 0.0003(12)
O1 0.0599(12) 0.0410(12) 0.0815(14) 0.0090(11) -0.0125(11) 0.0088(10)
O2 0.0387(10) 0.0680(15) 0.0792(14) 0.0092(12) -0.0060(9) -0.0145(10)
S1 0.0418(4) 0.0459(5) 0.0615(5) 0.0062(4) -0.0079(3) -0.0035(3)
 
_geom_special_details
;
 All esds (except the esd in the dihedral angle between two l.s. planes)
 are estimated using the full covariance matrix.  The cell esds are taken
 into account individually in the estimation of esds in distances, angles
 and torsion angles; correlations between esds in cell parameters are only
 used when they are defined by crystal symmetry.  An approximate (isotropic)
 treatment of cell esds is used for estimating esds involving l.s. planes.
;
 
loop_
 _geom_bond_atom_site_label_1
 _geom_bond_atom_site_label_2
 _geom_bond_distance
 _geom_bond_site_symmetry_2
 _geom_bond_publ_flag
C1 C2 1.390(4) . ?
C1 C6 1.395(4) . ?
C1 C13 1.518(4) . ?
C2 C3 1.366(5) . ?
C2 H2 0.9300 . ?
C3 C4 1.372(5) . ?
C3 H3 0.9300 . ?
C4 C5 1.364(4) . ?
C4 H4 0.9300 . ?
C5 C6 1.388(4) . ?
C5 H5 0.9300 . ?
C6 N1 1.403(3) . ?
C7 C12 1.396(4) . ?
C7 C8 1.397(4) . ?
C7 N1 1.411(4) . ?
C8 C9 1.370(5) . ?
C8 H8 0.9300 . ?
C9 C10 1.382(5) . ?
C9 H9 0.9300 . ?
C10 C11 1.364(5) . ?
C10 H10 0.9300 . ?
C11 C12 1.389(4) . ?
C11 H11 0.9300 . ?
C12 C13 1.504(4) . ?
C13 C15 1.539(4) . ?
C13 C14 1.553(5) . ?
C14 H14A 0.9600 . ?
C14 H14B 0.9600 . ?
C14 H14C 0.9600 . ?
C15 H15A 0.9600 . ?
C15 H15B 0.9600 . ?
C15 H15C 0.9600 . ?
C16 C21 1.371(4) . ?
C16 C17 1.384(4) . ?
C16 N1 1.433(3) . ?
C17 C18 1.382(4) . ?
C17 H17 0.9300 . ?
C18 C19 1.366(4) . ?
C18 H18 0.9300 . ?
C19 C20 1.380(4) . ?
C19 H19 0.9300 . ?
C20 C21 1.383(3) . ?
C20 S1 1.759(3) . ?
C21 H21 0.9300 . ?
C22 C23 1.380(4) . ?
C22 C27 1.396(4) . ?
C22 S1 1.762(3) . ?
C23 C24 1.371(4) . ?
C23 H23 0.9300 . ?
C24 C25 1.380(4) . ?
C24 H24 0.9300 . ?
C25 C26 1.382(4) . ?
C25 H25 0.9300 . ?
C26 C27 1.381(4) . ?
C26 N2 1.430(3) . ?
C27 H27 0.9300 . ?
C28 C33 1.399(4) . ?
C28 N2 1.399(4) . ?
C28 C29 1.408(4) . ?
C29 C30 1.380(4) . ?
C29 H29 0.9300 . ?
C30 C31 1.382(5) . ?
C30 H30 0.9300 . ?
C31 C32 1.380(4) . ?
C31 H31 0.9300 . ?
C32 C33 1.384(4) . ?
C32 H32 0.9300 . ?
C33 C34 1.520(4) . ?
C34 C35 1.520(4) . ?
C34 C42 1.528(4) . ?
C34 C41 1.549(4) . ?
C35 C40 1.386(4) . ?
C35 C36 1.396(4) . ?
C36 C37 1.384(4) . ?
C36 N2 1.414(3) . ?
C37 C38 1.377(4) . ?
C37 H37 0.9300 . ?
C38 C39 1.375(4) . ?
C38 H38 0.9300 . ?
C39 C40 1.368(4) . ?
C39 H39 0.9300 . ?
C40 H40 0.9300 . ?
C41 H41A 0.9600 . ?
C41 H41B 0.9600 . ?
C41 H41C 0.9600 . ?
C42 H42A 0.9600 . ?
C42 H42B 0.9600 . ?
C42 H42C 0.9600 . ?
O1 S1 1.4387(19) . ?
O2 S1 1.4335(18) . ?
 
loop_
 _geom_angle_atom_site_label_1
 _geom_angle_atom_site_label_2
 _geom_angle_atom_site_label_3
 _geom_angle
 _geom_angle_site_symmetry_1
 _geom_angle_site_symmetry_3
 _geom_angle_publ_flag
C2 C1 C6 116.8(3) . . ?
C2 C1 C13 122.4(3) . . ?
C6 C1 C13 120.7(3) . . ?
C3 C2 C1 122.0(3) . . ?
C3 C2 H2 119.0 . . ?
C1 C2 H2 119.0 . . ?
C2 C3 C4 120.5(4) . . ?
C2 C3 H3 119.7 . . ?
C4 C3 H3 119.7 . . ?
C5 C4 C3 119.0(4) . . ?
C5 C4 H4 120.5 . . ?
C3 C4 H4 120.5 . . ?
C4 C5 C6 121.1(3) . . ?
C4 C5 H5 119.5 . . ?
C6 C5 H5 119.5 . . ?
C5 C6 C1 120.5(3) . . ?
C5 C6 N1 120.7(3) . . ?
C1 C6 N1 118.8(3) . . ?
C12 C7 C8 120.6(3) . . ?
C12 C7 N1 119.3(3) . . ?
C8 C7 N1 120.1(3) . . ?
C9 C8 C7 120.2(3) . . ?
C9 C8 H8 119.9 . . ?
C7 C8 H8 119.9 . . ?
C8 C9 C10 120.0(3) . . ?
C8 C9 H9 120.0 . . ?
C10 C9 H9 120.0 . . ?
C11 C10 C9 119.5(4) . . ?
C11 C10 H10 120.2 . . ?
C9 C10 H10 120.2 . . ?
C10 C11 C12 122.6(3) . . ?
C10 C11 H11 118.7 . . ?
C12 C11 H11 118.7 . . ?
C11 C12 C7 117.1(3) . . ?
C11 C12 C13 122.4(3) . . ?
C7 C12 C13 120.3(3) . . ?
C12 C13 C1 110.2(2) . . ?
C12 C13 C15 111.6(3) . . ?
C1 C13 C15 110.6(3) . . ?
C12 C13 C14 108.3(3) . . ?
C1 C13 C14 107.8(3) . . ?
C15 C13 C14 108.0(3) . . ?
C13 C14 H14A 109.5 . . ?
C13 C14 H14B 109.5 . . ?
H14A C14 H14B 109.5 . . ?
C13 C14 H14C 109.5 . . ?
H14A C14 H14C 109.5 . . ?
H14B C14 H14C 109.5 . . ?
C13 C15 H15A 109.5 . . ?
C13 C15 H15B 109.5 . . ?
H15A C15 H15B 109.5 . . ?
C13 C15 H15C 109.5 . . ?
H15A C15 H15C 109.5 . . ?
H15B C15 H15C 109.5 . . ?
C21 C16 C17 119.6(3) . . ?
C21 C16 N1 119.4(3) . . ?
C17 C16 N1 121.0(3) . . ?
C18 C17 C16 120.3(3) . . ?
C18 C17 H17 119.8 . . ?
C16 C17 H17 119.8 . . ?
C19 C18 C17 120.4(3) . . ?
C19 C18 H18 119.8 . . ?
C17 C18 H18 119.8 . . ?
C18 C19 C20 119.0(3) . . ?
C18 C19 H19 120.5 . . ?
C20 C19 H19 120.5 . . ?
C21 C20 C19 121.3(3) . . ?
C21 C20 S1 119.3(2) . . ?
C19 C20 S1 119.3(2) . . ?
C16 C21 C20 119.3(3) . . ?
C16 C21 H21 120.3 . . ?
C20 C21 H21 120.3 . . ?
C23 C22 C27 121.2(3) . . ?
C23 C22 S1 119.5(2) . . ?
C27 C22 S1 119.3(2) . . ?
C24 C23 C22 119.1(3) . . ?
C24 C23 H23 120.4 . . ?
C22 C23 H23 120.4 . . ?
C23 C24 C25 120.5(3) . . ?
C23 C24 H24 119.8 . . ?
C25 C24 H24 119.8 . . ?
C24 C25 C26 120.5(3) . . ?
C24 C25 H25 119.7 . . ?
C26 C25 H25 119.7 . . ?
C27 C26 C25 119.9(3) . . ?
C27 C26 N2 121.1(3) . . ?
C25 C26 N2 119.0(3) . . ?
C26 C27 C22 118.8(3) . . ?
C26 C27 H27 120.6 . . ?
C22 C27 H27 120.6 . . ?
C33 C28 N2 118.8(2) . . ?
C33 C28 C29 120.4(3) . . ?
N2 C28 C29 120.8(3) . . ?
C30 C29 C28 119.7(3) . . ?
C30 C29 H29 120.1 . . ?
C28 C29 H29 120.1 . . ?
C31 C30 C29 120.5(3) . . ?
C31 C30 H30 119.8 . . ?
C29 C30 H30 119.8 . . ?
C32 C31 C30 119.1(3) . . ?
C32 C31 H31 120.5 . . ?
C30 C31 H31 120.5 . . ?
C31 C32 C33 122.7(3) . . ?
C31 C32 H32 118.6 . . ?
C33 C32 H32 118.6 . . ?
C32 C33 C28 117.6(3) . . ?
C32 C33 C34 124.0(3) . . ?
C28 C33 C34 118.2(3) . . ?
C33 C34 C35 108.7(2) . . ?
C33 C34 C42 112.3(3) . . ?
C35 C34 C42 112.1(2) . . ?
C33 C34 C41 107.9(2) . . ?
C35 C34 C41 107.8(2) . . ?
C42 C34 C41 107.9(3) . . ?
C40 C35 C36 117.3(3) . . ?
C40 C35 C34 123.6(3) . . ?
C36 C35 C34 118.8(2) . . ?
C37 C36 C35 120.6(3) . . ?
C37 C36 N2 121.3(3) . . ?
C35 C36 N2 118.1(3) . . ?
C38 C37 C36 120.2(3) . . ?
C38 C37 H37 119.9 . . ?
C36 C37 H37 119.9 . . ?
C39 C38 C37 120.0(3) . . ?
C39 C38 H38 120.0 . . ?
C37 C38 H38 120.0 . . ?
C40 C39 C38 119.5(3) . . ?
C40 C39 H39 120.2 . . ?
C38 C39 H39 120.2 . . ?
C39 C40 C35 122.3(3) . . ?
C39 C40 H40 118.8 . . ?
C35 C40 H40 118.8 . . ?
C34 C41 H41A 109.5 . . ?
C34 C41 H41B 109.5 . . ?
H41A C41 H41B 109.5 . . ?
C34 C41 H41C 109.5 . . ?
H41A C41 H41C 109.5 . . ?
H41B C41 H41C 109.5 . . ?
C34 C42 H42A 109.5 . . ?
C34 C42 H42B 109.5 . . ?
H42A C42 H42B 109.5 . . ?
C34 C42 H42C 109.5 . . ?
H42A C42 H42C 109.5 . . ?
H42B C42 H42C 109.5 . . ?
C6 N1 C7 120.2(2) . . ?
C6 N1 C16 118.7(3) . . ?
C7 N1 C16 118.1(2) . . ?
C28 N2 C36 119.3(2) . . ?
C28 N2 C26 120.7(2) . . ?
C36 N2 C26 119.4(2) . . ?
O2 S1 O1 119.46(13) . . ?
O2 S1 C20 108.46(13) . . ?
O1 S1 C20 108.69(12) . . ?
O2 S1 C22 108.82(12) . . ?
O1 S1 C22 107.61(14) . . ?
C20 S1 C22 102.47(13) . . ?
 
loop_
 _geom_torsion_atom_site_label_1
 _geom_torsion_atom_site_label_2
 _geom_torsion_atom_site_label_3
 _geom_torsion_atom_site_label_4
 _geom_torsion
 _geom_torsion_site_symmetry_1
 _geom_torsion_site_symmetry_2
 _geom_torsion_site_symmetry_3
 _geom_torsion_site_symmetry_4
 _geom_torsion_publ_flag
C6 C1 C2 C3 1.9(6) . . . . ?
C13 C1 C2 C3 -173.8(4) . . . . ?
C1 C2 C3 C4 -0.2(7) . . . . ?
C2 C3 C4 C5 -1.0(7) . . . . ?
C3 C4 C5 C6 0.5(6) . . . . ?
C4 C5 C6 C1 1.3(5) . . . . ?
C4 C5 C6 N1 -179.8(3) . . . . ?
C2 C1 C6 C5 -2.4(5) . . . . ?
C13 C1 C6 C5 173.4(3) . . . . ?
C2 C1 C6 N1 178.6(3) . . . . ?
C13 C1 C6 N1 -5.6(4) . . . . ?
C12 C7 C8 C9 0.6(5) . . . . ?
N1 C7 C8 C9 -179.4(3) . . . . ?
C7 C8 C9 C10 -1.5(5) . . . . ?
C8 C9 C10 C11 1.5(6) . . . . ?
C9 C10 C11 C12 -0.5(6) . . . . ?
C10 C11 C12 C7 -0.4(5) . . . . ?
C10 C11 C12 C13 173.7(3) . . . . ?
C8 C7 C12 C11 0.4(4) . . . . ?
N1 C7 C12 C11 -179.6(3) . . . . ?
C8 C7 C12 C13 -173.9(3) . . . . ?
N1 C7 C12 C13 6.1(4) . . . . ?
C11 C12 C13 C1 156.8(3) . . . . ?
C7 C12 C13 C1 -29.2(4) . . . . ?
C11 C12 C13 C15 33.4(4) . . . . ?
C7 C12 C13 C15 -152.6(3) . . . . ?
C11 C12 C13 C14 -85.4(4) . . . . ?
C7 C12 C13 C14 88.6(4) . . . . ?
C2 C1 C13 C12 -155.3(3) . . . . ?
C6 C1 C13 C12 29.1(4) . . . . ?
C2 C1 C13 C15 -31.4(5) . . . . ?
C6 C1 C13 C15 153.1(3) . . . . ?
C2 C1 C13 C14 86.6(4) . . . . ?
C6 C1 C13 C14 -89.0(3) . . . . ?
C21 C16 C17 C18 1.5(5) . . . . ?
N1 C16 C17 C18 -180.0(3) . . . . ?
C16 C17 C18 C19 -1.9(6) . . . . ?
C17 C18 C19 C20 0.4(5) . . . . ?
C18 C19 C20 C21 1.4(5) . . . . ?
C18 C19 C20 S1 -174.1(3) . . . . ?
C17 C16 C21 C20 0.4(4) . . . . ?
N1 C16 C21 C20 -178.2(3) . . . . ?
C19 C20 C21 C16 -1.8(4) . . . . ?
S1 C20 C21 C16 173.8(2) . . . . ?
C27 C22 C23 C24 -0.5(4) . . . . ?
S1 C22 C23 C24 -178.8(2) . . . . ?
C22 C23 C24 C25 1.4(5) . . . . ?
C23 C24 C25 C26 -0.7(5) . . . . ?
C24 C25 C26 C27 -0.9(5) . . . . ?
C24 C25 C26 N2 178.8(3) . . . . ?
C25 C26 C27 C22 1.8(4) . . . . ?
N2 C26 C27 C22 -177.9(2) . . . . ?
C23 C22 C27 C26 -1.1(4) . . . . ?
S1 C22 C27 C26 177.2(2) . . . . ?
C33 C28 C29 C30 1.6(4) . . . . ?
N2 C28 C29 C30 -177.5(3) . . . . ?
C28 C29 C30 C31 0.5(5) . . . . ?
C29 C30 C31 C32 -1.5(5) . . . . ?
C30 C31 C32 C33 0.3(5) . . . . ?
C31 C32 C33 C28 1.7(5) . . . . ?
C31 C32 C33 C34 -173.3(3) . . . . ?
N2 C28 C33 C32 176.5(3) . . . . ?
C29 C28 C33 C32 -2.6(4) . . . . ?
N2 C28 C33 C34 -8.2(4) . . . . ?
C29 C28 C33 C34 172.7(3) . . . . ?
C32 C33 C34 C35 -146.8(3) . . . . ?
C28 C33 C34 C35 38.2(3) . . . . ?
C32 C33 C34 C42 -22.2(4) . . . . ?
C28 C33 C34 C42 162.7(3) . . . . ?
C32 C33 C34 C41 96.5(3) . . . . ?
C28 C33 C34 C41 -78.5(3) . . . . ?
C33 C34 C35 C40 148.0(3) . . . . ?
C42 C34 C35 C40 23.3(4) . . . . ?
C41 C34 C35 C40 -95.3(3) . . . . ?
C33 C34 C35 C36 -37.7(3) . . . . ?
C42 C34 C35 C36 -162.4(3) . . . . ?
C41 C34 C35 C36 79.0(3) . . . . ?
C40 C35 C36 C37 0.8(4) . . . . ?
C34 C35 C36 C37 -173.9(3) . . . . ?
C40 C35 C36 N2 -178.2(3) . . . . ?
C34 C35 C36 N2 7.2(4) . . . . ?
C35 C36 C37 C38 -0.2(5) . . . . ?
N2 C36 C37 C38 178.7(3) . . . . ?
C36 C37 C38 C39 -0.4(5) . . . . ?
C37 C38 C39 C40 0.4(5) . . . . ?
C38 C39 C40 C35 0.3(5) . . . . ?
C36 C35 C40 C39 -0.8(4) . . . . ?
C34 C35 C40 C39 173.6(3) . . . . ?
C5 C6 N1 C7 159.9(3) . . . . ?
C1 C6 N1 C7 -21.2(4) . . . . ?
C5 C6 N1 C16 -0.3(4) . . . . ?
C1 C6 N1 C16 178.7(3) . . . . ?
C12 C7 N1 C6 21.1(4) . . . . ?
C8 C7 N1 C6 -159.0(3) . . . . ?
C12 C7 N1 C16 -178.6(3) . . . . ?
C8 C7 N1 C16 1.3(4) . . . . ?
C21 C16 N1 C6 -105.5(3) . . . . ?
C17 C16 N1 C6 76.0(4) . . . . ?
C21 C16 N1 C7 93.9(3) . . . . ?
C17 C16 N1 C7 -84.6(4) . . . . ?
C33 C28 N2 C36 -26.9(4) . . . . ?
C29 C28 N2 C36 152.2(3) . . . . ?
C33 C28 N2 C26 161.8(3) . . . . ?
C29 C28 N2 C26 -19.1(4) . . . . ?
C37 C36 N2 C28 -151.5(3) . . . . ?
C35 C36 N2 C28 27.4(4) . . . . ?
C37 C36 N2 C26 19.9(4) . . . . ?
C35 C36 N2 C26 -161.2(3) . . . . ?
C27 C26 N2 C28 83.4(3) . . . . ?
C25 C26 N2 C28 -96.4(3) . . . . ?
C27 C26 N2 C36 -87.9(3) . . . . ?
C25 C26 N2 C36 92.4(3) . . . . ?
C21 C20 S1 O2 167.0(2) . . . . ?
C19 C20 S1 O2 -17.3(3) . . . . ?
C21 C20 S1 O1 35.7(3) . . . . ?
C19 C20 S1 O1 -148.6(2) . . . . ?
C21 C20 S1 C22 -78.0(2) . . . . ?
C19 C20 S1 C22 97.7(3) . . . . ?
C23 C22 S1 O2 -140.2(2) . . . . ?
C27 C22 S1 O2 41.4(3) . . . . ?
C23 C22 S1 O1 -9.4(3) . . . . ?
C27 C22 S1 O1 172.2(2) . . . . ?
C23 C22 S1 C20 105.0(2) . . . . ?
C27 C22 S1 C20 -73.3(2) . . . . ?
 
_refine_diff_density_max    0.198
_refine_diff_density_min   -0.325
_refine_diff_density_rms    0.044

_shelx_res_file
;

    1_a.res created by SHELXL-2014/7

TITL 1_a.res in P2(1)/n
CELL  0.71073  11.9209  13.8313  20.2291   90.000   94.709   90.000
ZERR   4.000   0.0013   0.0016   0.0024    0.000    0.004    0.000
LATT 1
SYMM 1/2-X, 1/2+Y, 1/2-Z
SFAC C  H  N  O  S
UNIT 168 144 8 8 4
L.S. 20
ACTA
SIZE 0.22 0.2 0.18
CONF
BOND $H
FMAP 2
PLAN 20
LIST 6
TEMP 23.000
WGHT    0.064900
FVAR       0.42481
C1    1    0.754998    0.450738    0.910758    11.00000    0.06049    0.05005 =
         0.06657   -0.00300   -0.01019   -0.00209
C2    1    0.789782    0.429642    0.976443    11.00000    0.08002    0.09365 =
         0.07824    0.01084   -0.01945    0.00366
AFIX  43
H2    2    0.864749    0.439509    0.991452    11.00000   -1.20000
AFIX   0
C3    1    0.717268    0.394869    1.019625    11.00000    0.11897    0.12050 =
         0.06886    0.03308   -0.00345    0.02441
AFIX  43
H3    2    0.743508    0.381327    1.063206    11.00000   -1.20000
AFIX   0
C4    1    0.606057    0.379757    0.999236    11.00000    0.10182    0.10571 =
         0.08269    0.03156    0.00748    0.01164
AFIX  43
H4    2    0.556976    0.355120    1.028467    11.00000   -1.20000
AFIX   0
C5    1    0.568538    0.401421    0.935415    11.00000    0.07058    0.07878 =
         0.07584    0.01337   -0.00006   -0.00249
AFIX  43
H5    2    0.493123    0.391815    0.921342    11.00000   -1.20000
AFIX   0
C6    1    0.641071    0.437556    0.891159    11.00000    0.05752    0.04977 =
         0.05791    0.00201   -0.00492   -0.00669
C7    1    0.663254    0.523376    0.787673    11.00000    0.06858    0.04071 =
         0.05456   -0.00638    0.00299   -0.00540
C8    1    0.610044    0.570559    0.732670    11.00000    0.08246    0.05546 =
         0.06436    0.00000   -0.00204   -0.00339
AFIX  43
H8    2    0.533729    0.560624    0.721327    11.00000   -1.20000
AFIX   0
C9    1    0.669978    0.631458    0.695368    11.00000    0.11609    0.06010 =
         0.06035    0.00132    0.00417    0.00585
AFIX  43
H9    2    0.634781    0.661599    0.658148    11.00000   -1.20000
AFIX   0
C10   1    0.782784    0.648055    0.713105    11.00000    0.10501    0.07188 =
         0.08911    0.00923    0.03537   -0.00782
AFIX  43
H10   2    0.823338    0.690501    0.688533    11.00000   -1.20000
AFIX   0
C11   1    0.834230    0.601732    0.766913    11.00000    0.07258    0.06608 =
         0.09349   -0.00136    0.01909   -0.00457
AFIX  43
H11   2    0.910311    0.613131    0.778097    11.00000   -1.20000
AFIX   0
C12   1    0.777513    0.538217    0.805666    11.00000    0.05948    0.04289 =
         0.06570   -0.00959    0.00779   -0.00676
C13   1    0.836960    0.479866    0.860696    11.00000    0.05289    0.05578 =
         0.07650   -0.00357   -0.00841   -0.00666
C14   1    0.882440    0.386005    0.830358    11.00000    0.09500    0.08143 =
         0.10968   -0.00701    0.00175    0.03603
AFIX 137
H14A  2    0.821193    0.350995    0.807767    11.00000   -1.50000
H14B  2    0.917887    0.346526    0.865088    11.00000   -1.50000
H14C  2    0.936358    0.402459    0.799459    11.00000   -1.50000
AFIX   0
C15   1    0.937556    0.535246    0.894914    11.00000    0.09705    0.12867 =
         0.10992    0.00740   -0.03229   -0.05772
AFIX 137
H15A  2    0.986066    0.556466    0.862190    11.00000   -1.50000
H15B  2    0.978680    0.493485    0.926117    11.00000   -1.50000
H15C  2    0.910682    0.590339    0.917781    11.00000   -1.50000
AFIX   0
C16   1    0.485183    0.444405    0.805214    11.00000    0.05319    0.05663 =
         0.06232    0.00332   -0.00581   -0.00444
C17   1    0.403311    0.507170    0.824253    11.00000    0.08273    0.06235 =
         0.08574   -0.02052   -0.00790    0.00380
AFIX  43
H17   2    0.423849    0.560317    0.850695    11.00000   -1.20000
AFIX   0
C18   1    0.291175    0.491263    0.804166    11.00000    0.06755    0.07542 =
         0.09441   -0.02002   -0.00668    0.02256
AFIX  43
H18   2    0.236478    0.532702    0.818219    11.00000   -1.20000
AFIX   0
C19   1    0.260291    0.415010    0.763791    11.00000    0.04822    0.05958 =
         0.07527    0.00408   -0.00856    0.01009
AFIX  43
H19   2    0.184959    0.404385    0.749982    11.00000   -1.20000
AFIX   0
C20   1    0.342622    0.353987    0.743814    11.00000    0.04395    0.04406 =
         0.05030    0.00658   -0.00467    0.00097
C21   1    0.454778    0.367387    0.765018    11.00000    0.04772    0.04766 =
         0.05646   -0.00148   -0.00475   -0.00131
AFIX  43
H21   2    0.509050    0.324569    0.752136    11.00000   -1.20000
AFIX   0
C22   1    0.339072    0.314961    0.610582    11.00000    0.04194    0.04623 =
         0.05558    0.00212   -0.00571    0.00088
C23   1    0.434192    0.284759    0.581892    11.00000    0.04451    0.06009 =
         0.07973    0.00824    0.00422    0.00983
AFIX  43
H23   2    0.479478    0.236235    0.601560    11.00000   -1.20000
AFIX   0
C24   1    0.461041    0.327246    0.524006    11.00000    0.05422    0.08041 =
         0.08737    0.00728    0.01774    0.01572
AFIX  43
H24   2    0.524064    0.306436    0.503793    11.00000   -1.20000
AFIX   0
C25   1    0.395230    0.400641    0.495537    11.00000    0.06435    0.07359 =
         0.05750    0.00783    0.00971    0.00238
AFIX  43
H25   2    0.414683    0.429403    0.456524    11.00000   -1.20000
AFIX   0
C26   1    0.300622    0.431755    0.524541    11.00000    0.04727    0.05093 =
         0.05317    0.00274   -0.00372    0.00390
C27   1    0.270619    0.388189    0.581963    11.00000    0.03872    0.05426 =
         0.05535    0.00007   -0.00172    0.00340
AFIX  43
H27   2    0.205964    0.407301    0.601215    11.00000   -1.20000
AFIX   0
C28   1    0.252127    0.604394    0.516667    11.00000    0.04970    0.05588 =
         0.05199   -0.00406    0.00674   -0.00122
C29   1    0.306206    0.623732    0.579769    11.00000    0.06418    0.07020 =
         0.05842    0.00137    0.00262   -0.00736
AFIX  43
H29   2    0.334112    0.573177    0.606616    11.00000   -1.20000
AFIX   0
C30   1    0.317654    0.717991    0.601637    11.00000    0.08074    0.08306 =
         0.06963   -0.01942    0.00692   -0.00980
AFIX  43
H30   2    0.353920    0.730832    0.643176    11.00000   -1.20000
AFIX   0
C31   1    0.275612    0.793430    0.562250    11.00000    0.08800    0.06503 =
         0.10044   -0.02200    0.01255   -0.00330
AFIX  43
H31   2    0.281819    0.856842    0.577398    11.00000   -1.20000
AFIX   0
C32   1    0.224283    0.773382    0.500123    11.00000    0.07252    0.05878 =
         0.08697   -0.00371    0.00548    0.00743
AFIX  43
H32   2    0.196508    0.824518    0.473779    11.00000   -1.20000
AFIX   0
C33   1    0.212441    0.680306    0.475406    11.00000    0.04832    0.05022 =
         0.06109    0.00182    0.01001    0.00618
C34   1    0.167549    0.656409    0.404773    11.00000    0.04736    0.05501 =
         0.05771    0.01000    0.00302    0.00611
C35   1    0.102983    0.561651    0.405269    11.00000    0.04100    0.05989 =
         0.04800    0.00548    0.00520    0.00859
C36   1    0.143545    0.488124    0.448069    11.00000    0.04339    0.05930 =
         0.05042    0.00036    0.00378    0.00165
C37   1    0.093463    0.397763    0.445676    11.00000    0.05835    0.06138 =
         0.06228    0.00818    0.00092   -0.00370
AFIX  43
H37   2    0.121308    0.349248    0.474333    11.00000   -1.20000
AFIX   0
C38   1    0.002536    0.379542    0.400979    11.00000    0.05358    0.06712 =
         0.08186   -0.00481   -0.00101   -0.00850
AFIX  43
H38   2   -0.030686    0.318660    0.399279    11.00000   -1.20000
AFIX   0
C39   1   -0.039173    0.451367    0.358840    11.00000    0.04449    0.08203 =
         0.07217    0.00003   -0.00562   -0.00011
AFIX  43
H39   2   -0.100846    0.439415    0.328749    11.00000   -1.20000
AFIX   0
C40   1    0.010678    0.540507    0.361493    11.00000    0.04521    0.07690 =
         0.06214    0.00844   -0.00135    0.00883
AFIX  43
H40   2   -0.018405    0.588636    0.332904    11.00000   -1.20000
AFIX   0
C41   1    0.269685    0.641063    0.363285    11.00000    0.06063    0.07902 =
         0.06182    0.01103    0.01180   -0.00749
AFIX 137
H41A  2    0.319296    0.593733    0.384551    11.00000   -1.50000
H41B  2    0.309273    0.701068    0.359876    11.00000   -1.50000
H41C  2    0.243784    0.618879    0.319716    11.00000   -1.50000
AFIX   0
C42   1    0.096046    0.738157    0.372712    11.00000    0.07888    0.06202 =
         0.09662    0.01870   -0.01170    0.00729
AFIX 137
H42A  2    0.074011    0.722042    0.327338    11.00000   -1.50000
H42B  2    0.139100    0.796888    0.374366    11.00000   -1.50000
H42C  2    0.030104    0.746900    0.396289    11.00000   -1.50000
AFIX   0
N1    3    0.601737    0.459975    0.825669    11.00000    0.05544    0.06543 =
         0.06160    0.00320   -0.01366   -0.01782
N2    3    0.235583    0.509284    0.494405    11.00000    0.05753    0.04999 =
         0.05345    0.00593   -0.01004    0.00027
O1    4    0.379161    0.181233    0.699009    11.00000    0.05991    0.04101 =
         0.08151    0.00896   -0.01245    0.00882
O2    4    0.185866    0.248407    0.683336    11.00000    0.03874    0.06798 =
         0.07923    0.00922   -0.00602   -0.01455
S1    5    0.305279    0.262427    0.685789    11.00000    0.04185    0.04594 =
         0.06147    0.00624   -0.00788   -0.00346
HKLF 4

REM  1_a.res in P2(1)/n
REM R1 =  0.0539 for    3300 Fo > 4sig(Fo)  and  0.1121 for all    6092 data
REM    428 parameters refined using      0 restraints

END

WGHT      0.0561      0.0000

REM Highest difference peak  0.198,  deepest hole -0.325,  1-sigma level  0.044
Q1    1   0.9971  0.5027  0.8341  11.00000  0.05    0.20
Q2    1   0.1008  0.5627  0.4742  11.00000  0.05    0.15
Q3    1   0.5784  0.3364  0.5250  11.00000  0.05    0.15
Q4    1  -0.2368  0.4012  0.2744  11.00000  0.05    0.15
Q5    1  -0.0638  0.4250  0.4695  11.00000  0.05    0.15
Q6    1   0.0252  0.6541  0.3131  11.00000  0.05    0.14
Q7    1   0.8915  0.6338  0.6756  11.00000  0.05    0.14
Q8    1   0.4658  0.4389  0.9736  11.00000  0.05    0.14
Q9    1   0.5015  0.4029  0.4406  11.00000  0.05    0.14
Q10   1   0.3716  0.6602  0.4386  11.00000  0.05    0.14
Q11   1   0.3160  0.3656  0.7736  11.00000  0.05    0.14
Q12   1   0.5711  0.3920  0.5147  11.00000  0.05    0.14
Q13   1   0.3040  0.6220  0.7846  11.00000  0.05    0.14
Q14   1   0.5094  0.2522  0.6476  11.00000  0.05    0.14
Q15   1   0.1166  0.8442  0.4017  11.00000  0.05    0.13
Q16   1  -0.1172  0.3876  0.4130  11.00000  0.05    0.13
Q17   1   0.4196  0.1790  0.6026  11.00000  0.05    0.13
Q18   1   0.4376  0.3987  0.8520  11.00000  0.05    0.13
Q19   1   0.4778  0.4953  0.9289  11.00000  0.05    0.13
Q20   1   0.8787  0.6780  0.6318  11.00000  0.05    0.13
;
_shelx_res_checksum   25843

_shelx_hkl_file
;
  -1   0   0   -9.60    0.80
   1   0   0   -8.00    0.90
   1   0   0  -10.50    0.80
   1   0   0   -9.10    0.80
  -2   0   0 9333.27  320.77
   2   0   0 9237.18  319.47
   2   0   0 9513.35  320.67
   2   0   0 9362.96  311.57
  -3   0   0   -0.10    0.70
   3   0   0   -1.20    1.20
   3   0   0    0.30    1.10
   3   0   0   -0.80    1.40
  -4   0   0   99.19    7.00
   4   0   0  120.29    7.10
   4   0   0  123.79    8.40
  -5   0   0   -1.60    1.60
   5   0   0    5.90    3.00
   5   0   0    0.00    1.50
  -6   0   0    1.20    2.40
   6   0   0    4.50    2.30
   6   0   0   -0.60    2.70
  -7   0   0    2.40    2.50
   7   0   0   -1.10    2.10
   7   0   0    1.70    3.70
  -8   0   0    7.20    3.80
   8   0   0   17.80    5.80
   8   0   0   13.80    3.70
  -9   0   0   -2.40    2.70
   9   0   0   -2.00    2.10
   9   0   0   -3.00    3.40
 -10   0   0   79.89   10.70
  10   0   0   91.69    9.20
  10   0   0   95.89   14.00
 -11   0   0   -1.90    3.20
  11   0   0   -2.60    4.20
  11   0   0   -1.30    3.10
 -12   0   0   -2.60    4.20
  12   0   0    5.40    7.10
 -13   0   0    6.30    4.70
  13   0   0    5.80    7.50
  14   0   0    5.60    7.50
  14   1   0    4.30    9.20
 -14  -1   0    3.30    5.80
  13   1   0    1.10    7.60
 -13  -1   0    0.30    5.20
  12   1   0    4.70    5.60
 -12  -1   0    4.40    5.20
  11   1   0   -2.70    4.00
 -11  -1   0    1.20    4.60
  10   1   0   13.50    3.60
  10   1   0   16.50    7.80
 -10  -1   0   12.50    5.70
   9   1   0    0.20    2.10
   9   1   0    4.30    4.60
  -9  -1   0   -1.40    3.00
   8   1   0    3.80    4.70
   8   1   0    3.90    2.20
  -8  -1   0    1.50    2.50
   7   1   0   63.99    5.60
   7   1   0   49.20    8.50
   6   1   0   33.90    7.00
   6   1   0   33.30    3.80
  -6  -1   0   17.40    4.50
   5   1   0   31.90    6.00
   5   1   0   31.30    3.20
  -5  -1   0   20.40    4.40
   4   1   0   19.70    2.20
   4   1   0   15.20    3.90
  -4  -1   0   17.80    3.90
   3   1   0  383.06   13.60
   3   1   0  337.97   16.50
  -3  -1   0  372.06   16.30
   2   1   0 2314.97   79.99
  -2  -1   0 2354.06   81.69
  -2  -1   0 2296.67   79.89
   1   1   0   64.79    3.90
   1   1   0   75.99    4.20
  -1  -1   0   71.79    4.00
  -1  -1   0   65.79    4.00
   0   1   0   -1.10    0.50
   0  -1   0   -1.90    0.50
  -1   1   0   81.59    3.40
   1  -1   0   75.59    3.40
   1  -1   0   71.59    4.70
  -2   1   0 2592.74   84.49
   2  -1   0 2429.56   88.79
   2  -1   0 2480.05   84.39
  -3   1   0  370.66   14.70
   3  -1   0  368.06   16.60
   3  -1   0  348.67   14.60
  -4   1   0   22.70    3.50
   4  -1   0   19.70    4.00
  -5   1   0   27.30    4.30
   5  -1   0   39.50    6.40
   5  -1   0   15.60    3.90
  -6   1   0   38.90    5.70
   6  -1   0   45.30    7.60
   6  -1   0   30.60    5.50
  -7   1   0   74.29    8.60
   7  -1   0   78.19   10.40
   7  -1   0   59.79    7.70
  -8   1   0    4.40    3.30
   8  -1   0   12.00    5.10
   8  -1   0    2.60    3.10
  -9   1   0   -1.60    3.00
   9  -1   0    3.30    4.40
   9  -1   0    0.80    2.90
 -10   1   0    8.00    4.30
  10  -1   0   10.30    4.40
  10  -1   0   10.70    6.80
 -11   1   0   -2.40    3.20
  11  -1   0   -0.80    3.20
  11  -1   0   -6.10    3.80
 -12   1   0    2.10    4.50
  12  -1   0    8.10    7.40
 -13   1   0   -2.20    4.40
  13  -1   0   12.90    8.40
  14  -1   0   -0.40    6.70
  14   2   0    6.70    7.60
 -14  -2   0   -4.30    4.90
  13   2   0   -9.30    5.50
 -13  -2   0   -2.00    4.60
  12   2   0   12.20    7.90
 -12  -2   0    9.70    6.80
  11   2   0    6.10    6.50
 -11  -2   0   -2.20    2.90
  10   2   0   46.80   10.90
 -10  -2   0   25.40    7.10
   9   2   0   -0.50    1.40
   9   2   0    0.10    4.30
  -9  -2   0   -0.10    3.70
   8   2   0  566.24   30.20
   8   2   0  538.35   20.70
  -8  -2   0  544.35   28.10
   7   2   0  176.48    7.90
   7   2   0  170.38   16.40
  -7  -2   0  198.48   14.10
   6   2   0  303.47   18.30
   6   2   0  298.87   11.50
  -6  -2   0  289.37   17.20
   5   2   0    2.70    3.00
  -5  -2   0   -1.90    2.00
   4   2   0    4.50    2.90
  -4  -2   0    6.00    2.70
   3   2   0    0.10    1.80
  -3  -2   0   -1.20    1.20
   2   2   0  484.85   19.60
  -2  -2   0  452.85   19.60
   1   2   0    3.10    1.50
   1   2   0    7.10    1.80
  -1  -2   0    6.00    1.80
  -1  -2   0    4.90    1.70
   0   2   0 2143.39   72.49
   0  -2   0 2129.69   75.89
   0  -2   0 2122.79   72.59
  -1   2   0    8.00    1.20
   1  -2   0    7.50    1.30
   1  -2   0    2.90    1.70
   2  -2   0  477.05   16.90
   2  -2   0  478.65   21.10
   2  -2   0  461.15   17.30
  -3   2   0    1.40    1.10
   3  -2   0    2.60    1.40
   3  -2   0   -0.50    1.70
  -4   2   0    5.00    1.90
   4  -2   0    7.60    2.10
   4  -2   0    9.30    3.30
  -5   2   0   -1.80    1.40
   5  -2   0    3.70    2.80
  -6   2   0  284.87   14.50
   6  -2   0  313.97   17.90
  -7   2   0  178.48   11.60
   7  -2   0  242.38   15.90
   7  -2   0  195.78   14.00
  -8   2   0  535.85   24.90
   8  -2   0  583.74   29.60
   8  -2   0  525.65   27.00
  -9   2   0    2.60    3.00
   9  -2   0    6.10    4.00
   9  -2   0   -0.60    3.60
 -10   2   0   52.59    8.40
  10  -2   0   53.09   10.70
  10  -2   0   57.99    9.20
 -11   2   0   17.00    5.70
  11  -2   0    4.80    4.50
  11  -2   0    0.50    4.80
 -12   2   0   10.10    5.50
  12  -2   0   23.70    9.20
  12  -2   0   16.60    6.00
  13  -2   0   -9.10    5.70
  14  -2   0   -9.00    6.40
  14   3   0    4.00    8.50
  13   3   0    2.50    7.10
 -13  -3   0   -0.90    4.60
  12   3   0   -8.00    5.10
 -12  -3   0   -5.10    4.90
  11   3   0   37.20   10.10
 -11  -3   0   32.70    9.40
  10   3   0   60.29   11.40
 -10  -3   0   48.20   10.30
   9   3   0   91.19   13.40
  -9  -3   0   97.09   13.30
   8   3   0   49.99    9.70
  -8  -3   0   63.49   10.10
   7   3   0   17.10    6.00
  -7  -3   0   19.20    6.20
   6   3   0   -2.60    3.10
  -6  -3   0    2.10    3.00
   5   3   0  376.46   20.10
  -5  -3   0  385.66   20.10
   4   3   0   24.00    4.70
  -4  -3   0   22.80    5.00
   3   3   0   16.90    3.70
  -3  -3   0   16.20    1.90
  -3  -3   0   16.80    4.20
  -3  -3   0   15.20    1.90
   2   3   0  200.78   10.80
  -2  -3   0  199.98    9.30
  -2  -3   0  183.08   10.80
  -1  -3   0  324.07   15.00
  -1  -3   0  360.36   15.40
   0   3   0   -2.00    0.90
   0  -3   0    0.60    1.20
   0  -3   0   -1.30    1.50
  -1   3   0  380.66   14.60
   1  -3   0  384.96   15.00
   1  -3   0  363.86   18.00
  -2   3   0  195.98    8.30
   2  -3   0  202.78    8.50
   2  -3   0  201.78   12.40
   3  -3   0   14.70    2.10
   3  -3   0   15.40    4.20
   3  -3   0   13.60    2.40
  -4   3   0   17.50    2.70
   4  -3   0   20.60    4.80
   4  -3   0   19.90    3.20
  -5   3   0  392.46   17.30
   5  -3   0  455.35   23.10
  -6   3   0    5.60    2.30
   6  -3   0    2.50    3.00
  -7   3   0   20.40    4.40
   7  -3   0   22.80    6.20
  -8   3   0   81.19    8.80
   8  -3   0   85.19   11.30
  -9   3   0  107.69   10.60
   9  -3   0   79.49   11.20
   9  -3   0   94.09   13.90
 -10   3   0   53.39    7.90
  10  -3   0   53.79    9.80
  10  -3   0   48.60   10.20
 -11   3   0   36.20    6.90
  11  -3   0   27.50    7.70
  11  -3   0   17.90    7.50
  12  -3   0   -3.40    4.30
  12  -3   0   -0.40    4.50
  13  -3   0   11.30    8.10
  14  -3   0   17.80   10.50
  13   4   0   -3.50    6.10
 -13  -4   0    1.30    6.10
  12   4   0    5.40    7.60
 -12  -4   0    3.10    5.80
  11   4   0    5.40    6.80
 -11  -4   0    3.90    6.20
  10   4   0   62.69   12.40
 -10  -4   0   63.49   12.50
   9   4   0   11.50    6.40
  -9  -4   0   12.10    6.90
   8   4   0  188.98   18.90
  -8  -4   0  165.98   17.90
   7   4   0   14.50    5.50
  -7  -4   0    8.80    4.90
   6   4   0   77.79   10.50
  -6  -4   0   71.39   10.10
   5   4   0   78.19    9.40
  -5  -4   0   80.39   10.30
   4   4   0    1.90    2.70
  -4  -4   0   -0.80    0.90
  -4  -4   0    0.90    1.00
  -4  -4   0    0.50    2.00
   3   4   0    4.30    2.50
  -3  -4   0    2.60    2.50
  -3  -4   0    2.80    1.50
   2   4   0   96.09    7.10
  -2  -4   0   86.69    6.40
  -2  -4   0  100.79    9.60
  -1  -4   0  131.49    8.70
   0  -4   0   61.49    6.10
   0  -4   0   54.09    6.80
   1  -4   0  148.09   10.60
   1  -4   0  146.99    7.90
   2  -4   0   92.19   10.00
   2  -4   0   90.79    5.60
   3  -4   0    2.60    1.70
   3  -4   0    0.90    2.40
   3  -4   0    3.90    1.50
   4  -4   0    2.10    2.50
   4  -4   0   -0.10    1.00
   5  -4   0   86.19   11.50
   5  -4   0   78.79    5.20
  -6   4   0   87.69    7.30
   6  -4   0   74.09   11.10
  -7   4   0    7.30    3.10
   7  -4   0    8.50    4.90
  -8   4   0  184.98   11.40
   8  -4   0  198.38   19.10
  -9   4   0   17.30    4.50
   9  -4   0   13.30    6.10
 -10   4   0   56.39    7.80
  10  -4   0   73.19   12.40
  10  -4   0   39.60    9.70
 -11   4   0   11.10    4.80
  11  -4   0   21.10    8.20
  11  -4   0   12.10    6.90
  12  -4   0    5.00    6.20
  12  -4   0   11.40    6.20
  13  -4   0   -3.00    5.20
  13  -4   0    0.00    5.60
  13   5   0  -10.50    5.50
 -13  -5   0    6.60    6.30
  12   5   0   13.10    7.50
 -12  -5   0   26.70   10.60
  11   5   0   53.29   12.00
 -11  -5   0   51.69   12.00
  10   5   0   18.60    7.80
 -10  -5   0   18.70    7.60
   9   5   0   42.20   10.10
  -9  -5   0   38.30    9.50
   8   5   0  190.18   18.80
  -8  -5   0  172.28   18.40
   7   5   0    0.70    4.40
  -7  -5   0    2.80    4.10
   6   5   0  329.07   19.70
  -6  -5   0  296.27   19.70
   5   5   0    4.80    3.60
  -5  -5   0   -0.90    3.10
   4   5   0    3.10    3.00
  -4  -5   0   -0.40    2.90
  -4  -5   0    1.20    1.50
  -3  -5   0   33.00    6.30
  -3  -5   0   18.90    3.80
  -2  -5   0    6.20    3.40
  -2  -5   0    5.00    2.40
  -1  -5   0    0.40    1.20
  -1  -5   0    2.50    2.10
   0  -5   0    0.10    1.60
   0  -5   0    1.30    2.10
   1  -5   0   -0.20    1.40
   1  -5   0    8.40    3.70
   2  -5   0    6.40    2.20
   2  -5   0    9.80    4.30
   3  -5   0   33.70    4.10
   3  -5   0   17.10    5.70
   4  -5   0    4.00    3.70
   4  -5   0    4.30    1.70
   5  -5   0    2.10    3.40
   5  -5   0    1.00    1.40
   6  -5   0  335.17   22.20
   6  -5   0  302.17   13.60
   7  -5   0   -1.00    3.90
   7  -5   0    4.30    2.20
   8  -5   0  165.38    9.70
   8  -5   0  187.98   19.80
  -9   5   0   41.30    6.00
   9  -5   0   33.70    8.90
 -10   5   0   12.50    4.20
  10  -5   0    7.50    5.60
  11  -5   0   72.69   14.30
  11  -5   0   88.09   14.30
  12  -5   0   35.00    9.40
  12  -5   0   34.20   10.70
  13  -5   0   -3.00    6.20
  13  -5   0   11.70    7.20
  13   6   0   11.10    8.40
 -13  -6   0    9.20    7.50
  12   6   0   -7.40    5.40
 -12  -6   0   -1.60    5.50
  11   6   0   -1.50    4.90
 -11  -6   0   -5.10    5.00
  10   6   0  142.19   18.30
 -10  -6   0  148.59   19.10
   9   6   0   32.70    9.50
  -9  -6   0   15.10    7.30
   8   6   0   35.70    9.20
  -8  -6   0   28.40    8.30
   7   6   0   15.80    6.30
  -7  -6   0   20.20    7.00
   6   6   0   72.59   10.80
  -6  -6   0   68.39   11.20
   5   6   0   21.00    6.30
  -5  -6   0   20.30    6.30
  -5  -6   0   18.70    2.90
  -5  -6   0   20.30    3.30
   4   6   0   28.40    5.90
  -4  -6   0   19.70    3.70
  -4  -6   0   20.30    6.30
  -3  -6   0  270.07   17.50
  -3  -6   0  283.97   15.40
  -2  -6   0   26.30    5.50
  -2  -6   0   35.50    5.80
  -1  -6   0    6.00    3.30
  -1  -6   0   12.40    3.80
   0  -6   0  555.44   25.00
   0  -6   0  570.24   27.90
   1  -6   0    6.70    4.10
   1  -6   0    6.90    2.80
   2  -6   0   24.50    6.90
   2  -6   0   34.60    4.90
   3  -6   0  303.37   21.60
   3  -6   0  339.87   15.40
   4  -6   0   42.70    5.10
   4  -6   0   34.90    8.60
   5  -6   0   11.60    6.80
   5  -6   0   27.30    4.00
   6  -6   0   79.59   12.80
   6  -6   0   88.09    7.20
   7  -6   0   29.80    4.30
   7  -6   0   22.30    7.90
   8  -6   0   35.50    4.80
   8  -6   0   30.10    9.00
   9  -6   0   22.90    8.90
   9  -6   0   34.00    5.10
  10  -6   0  178.88   20.60
  11  -6   0   -1.70    5.20
  12  -6   0    2.70    6.40
  12  -6   0   -2.00    5.50
  13  -6   0   13.80    8.20
  13  -6   0   27.50    9.30
  13   7   0    2.60    8.00
  12   7   0   -0.90    5.60
 -12  -7   0    1.30    7.30
  11   7   0   -2.80    5.50
 -11  -7   0   -0.20    6.20
  10   7   0    6.40    5.90
 -10  -7   0    0.40    6.30
   9   7   0   -5.10    4.50
  -9  -7   0   -2.10    4.60
   8   7   0  114.89   15.50
  -8  -7   0   92.99   14.50
   7   7   0    6.30    5.70
  -7  -7   0   -0.70    4.10
   6   7   0   -1.80    4.10
  -6  -7   0    0.20    1.70
  -6  -7   0    3.40    3.90
  -6  -7   0    1.80    1.40
   5   7   0   68.39   10.40
  -5  -7   0   96.79   13.40
  -5  -7   0   88.99    6.80
  -4  -7   0   26.40    6.70
  -4  -7   0   18.30    4.30
  -3  -7   0   88.79   11.40
  -3  -7   0   89.39    9.60
  -2  -7   0  163.68   15.60
  -2  -7   0  178.98   13.10
  -1  -7   0   17.80    5.00
  -1  -7   0   23.40    6.00
   0  -7   0   -1.20    1.90
   0  -7   0   -5.40    1.90
   1  -7   0   24.20    4.80
   1  -7   0   14.70    5.80
   2  -7   0  166.38   17.20
   2  -7   0  168.08   10.90
   3  -7   0  109.99   14.90
   3  -7   0  106.19    8.00
   4  -7   0   31.90    5.10
   4  -7   0   23.90    7.70
   5  -7   0   86.59   14.00
   5  -7   0   98.59    8.50
   6  -7   0   -0.90    2.10
   6  -7   0    0.50    5.20
   7  -7   0    3.70    5.60
   7  -7   0    2.40    2.50
   8  -7   0  134.09    8.80
   8  -7   0  105.19   16.80
   9  -7   0   -1.40    2.50
   9  -7   0    0.00    5.60
  10  -7   0    5.60    6.00
  11  -7   0    4.00    7.00
  12  -7   0   -8.00    6.10
  13  -7   0   -7.00    5.40
  12   8   0    6.10    7.30
 -12  -8   0   -4.50    6.50
  11   8   0   -3.20    5.60
 -11  -8   0    2.80    7.00
  10   8   0    9.10    6.10
 -10  -8   0   -9.20    4.60
   9   8   0   17.80    8.50
  -9  -8   0   11.00    7.30
   8   8   0   98.79   14.70
  -8  -8   0   62.89   12.40
   7   8   0   31.10    8.30
  -7  -8   0   26.00    8.80
   6   8   0   15.40    6.50
  -6  -8   0   10.60    6.40
  -6  -8   0   27.10    3.90
  -5  -8   0    8.90    3.30
  -5  -8   0   18.40    6.60
  -4  -8   0   17.10    4.60
  -4  -8   0   17.10    6.50
  -3  -8   0   11.30    4.00
  -3  -8   0   11.80    5.10
  -2  -8   0  276.27   18.60
  -2  -8   0  288.17   18.20
  -1  -8   0  126.79   14.00
  -1  -8   0  193.08   16.50
   0  -8   0  253.47   15.90
   0  -8   0  258.67   18.60
   1  -8   0  171.48   12.70
   1  -8   0  187.78   18.90
   2  -8   0  281.87   21.00
   2  -8   0  288.27   16.20
   3  -8   0   10.30    3.60
   3  -8   0    6.90    4.90
   4  -8   0   16.80    7.20
   4  -8   0   15.40    4.10
   5  -8   0   -2.30    3.60
   5  -8   0    8.10    3.50
   6  -8   0   27.90    4.90
   6  -8   0   20.00    8.90
   7  -8   0   24.10    9.30
   7  -8   0   16.50    4.10
   8  -8   0  125.39   10.10
   8  -8   0   82.29   15.50
   9  -8   0   16.90    8.90
  10  -8   0    9.40    7.10
  11  -8   0    3.90    7.00
  12  -8   0   -3.60    6.90
  11   9   0    8.00    7.10
 -11  -9   0    4.00    6.20
  10   9   0   18.20    8.00
 -10  -9   0   17.70    8.70
   9   9   0    2.90    4.90
  -9  -9   0    8.40    6.90
   8   9   0   56.09   10.90
  -8  -9   0   68.89   14.10
   7   9   0  223.38   21.60
  -7  -9   0  210.58   23.10
  -6  -9   0   20.80    4.10
  -6  -9   0   14.20    6.80
  -5  -9   0   68.39   12.80
  -5  -9   0   61.79    7.90
  -4  -9   0   27.60    8.10
  -4  -9   0   38.80    7.10
  -3  -9   0   97.79   11.70
  -3  -9   0  109.99   13.80
  -2  -9   0   -1.70    3.70
  -2  -9   0    0.70    3.30
  -1  -9   0    8.40    5.10
  -1  -9   0    6.30    4.10
   0  -9   0    2.80    3.10
   0  -9   0   -3.20    3.00
   1  -9   0    7.80    4.10
   1  -9   0   12.50    5.50
   2  -9   0   -3.40    2.50
   2  -9   0    3.20    5.30
   3  -9   0  111.59   11.50
   3  -9   0  134.19   17.70
   4  -9   0   29.40    9.50
   4  -9   0   48.40    7.10
   5  -9   0   56.19   12.70
   5  -9   0   71.99    8.30
   6  -9   0   17.40    7.80
   6  -9   0   18.20    4.70
   7  -9   0  243.58   14.10
   7  -9   0  229.38   26.30
   8  -9   0   86.09    9.20
   8  -9   0   83.19   16.20
   9  -9   0    0.50    7.40
  10  -9   0    9.80    7.80
  11  -9   0   -5.60    5.90
  11  10   0    0.60    6.40
 -11 -10   0   -1.50    7.20
  10  10   0   11.60    7.00
 -10 -10   0    8.50    7.90
   9  10   0    2.60    5.60
  -9 -10   0   -4.90    4.90
  -8 -10   0   26.00    9.80
  -7 -10   0   32.70    9.50
  -6 -10   0   95.39    9.40
  -6 -10   0   73.09   13.90
  -5 -10   0   -4.60    2.30
  -5 -10   0    3.80    5.20
  -4 -10   0   -1.90    4.40
  -4 -10   0    6.50    4.40
  -3 -10   0    9.60    4.70
  -3 -10   0    9.50    6.10
  -2 -10   0    0.50    3.50
  -2 -10   0    2.40    4.00
  -1 -10   0   57.39   10.60
  -1 -10   0   69.59   11.00
   0 -10   0   48.50    9.20
   0 -10   0   27.20    8.40
   1 -10   0   67.79   12.30
   1 -10   0   98.59   12.20
   2 -10   0   -1.40    2.80
   2 -10   0   -1.60    4.70
   3 -10   0    9.00    4.40
   3 -10   0   -2.90    3.60
   4 -10   0    3.20    5.40
   4 -10   0    7.80    4.10
   5 -10   0    3.90    3.40
   5 -10   0    6.40    7.20
   6 -10   0   96.09   17.50
   6 -10   0  113.19   11.30
   7 -10   0    8.70    7.50
   7 -10   0   29.60    5.70
   8 -10   0   36.80   11.30
   9 -10   0    1.80    7.10
  10 -10   0   27.30   11.10
  11 -10   0    1.60    7.60
 -10 -11   0   -1.00    6.30
  -9 -11   0   -1.00    6.80
  -8 -11   0   15.80    9.10
  -7 -11   0    0.50    5.40
  -6 -11   0   17.50    7.80
  -5 -11   0   24.70    9.10
  -5 -11   0   31.30    6.80
  -4 -11   0   10.50    7.00
  -4 -11   0    7.30    4.40
  -3 -11   0  154.58   16.60
  -3 -11   0  116.19   15.80
  -2 -11   0   69.19   12.80
  -2 -11   0   28.50    7.70
  -1 -11   0   30.40    8.60
  -1 -11   0   16.40    7.10
   0 -11   0   -5.10    4.00
   0 -11   0   -7.30    3.20
   1 -11   0   22.10    6.30
   1 -11   0    9.90    6.60
   2 -11   0   84.29   11.20
   2 -11   0   83.49   15.00
   3 -11   0  123.49   18.40
   3 -11   0  172.88   16.00
   4 -11   0    2.70    4.00
   4 -11   0   -5.40    4.40
   5 -11   0   34.80    7.20
   5 -11   0   34.20   10.60
   6 -11   0   31.60    7.20
   6 -11   0   31.00   10.80
   7 -11   0    3.10    7.70
   8 -11   0   10.80    8.90
   9 -11   0   -3.50    6.10
  10 -11   0   -0.70    7.70
  -9 -12   0    5.40    8.00
  -8 -12   0    7.30    8.00
  -7 -12   0    6.60    6.20
  -6 -12   0   10.80    7.70
  -5 -12   0    1.60    5.60
  -5 -12   0    6.90    4.60
  -4 -12   0    8.40    6.80
  -4 -12   0   19.90    6.90
  -3 -12   0    7.80    7.00
  -3 -12   0    8.40    6.00
  -2 -12   0   27.90    8.90
  -2 -12   0    6.70    4.90
  -1 -12   0   25.30    7.80
  -1 -12   0   28.80    9.30
   0 -12   0    0.60    5.00
   0 -12   0   10.00    5.90
   1 -12   0   24.90   10.20
   1 -12   0   51.69   10.30
   2 -12   0   46.40    9.30
   2 -12   0   61.89   13.20
   3 -12   0   10.20    7.60
   3 -12   0   12.30    5.50
   4 -12   0   13.70    9.90
   4 -12   0   12.00    5.60
   5 -12   0    5.20    4.70
   5 -12   0    2.20    7.60
   6 -12   0   15.60    5.80
   6 -12   0   11.10    8.10
   7 -12   0    1.20    7.10
   8 -12   0    6.30    7.80
   9 -12   0   12.20   10.70
  -8 -13   0   14.70    9.20
  -7 -13   0    8.50    7.80
  -6 -13   0    2.90    5.70
  -5 -13   0   38.40    8.90
  -5 -13   0   25.00    9.30
  -4 -13   0   37.50   11.00
  -4 -13   0   52.49   10.40
  -3 -13   0   -4.00    5.90
  -3 -13   0   11.30    6.60
  -2 -13   0    7.30    6.50
  -2 -13   0   -4.10    3.40
  -1 -13   0   15.90    7.90
  -1 -13   0   16.50    8.50
   0 -13   0    2.50    6.00
   0 -13   0    0.10    4.80
   1 -13   0   20.70    7.10
   1 -13   0    6.60    6.40
   2 -13   0    6.80    5.50
   2 -13   0    1.60    6.90
   3 -13   0   14.90    9.10
   3 -13   0    0.90    5.00
   4 -13   0   49.20    9.40
   4 -13   0   57.89   14.50
   5 -13   0   29.80   11.60
   5 -13   0   34.50    7.90
   6 -13   0   -2.40    7.40
   7 -13   0   16.70    9.90
   8 -13   0   -2.40    6.80
  -7 -14   0   -5.00    6.70
  -6 -14   0    3.70    6.60
  -5 -14   0    3.00    7.50
  -4 -14   0    0.80    5.40
  -4 -14   0   -1.00    5.00
  -3 -14   0    2.80    7.80
  -3 -14   0    5.00    6.10
  -2 -14   0    0.80    3.70
  -2 -14   0    1.20    6.10
  -1 -14   0   32.50   10.40
   0 -14   0   17.70    9.90
   0 -14   0   19.30    8.40
   1 -14   0   31.80    9.40
   1 -14   0   38.90   12.60
   2 -14   0  -10.30    6.10
   2 -14   0    8.50    6.10
   3 -14   0   17.80    6.90
   3 -14   0   -5.60    6.00
   4 -14   0    2.00    5.50
   4 -14   0   -8.10    5.40
   5 -14   0    1.20    7.70
   5 -14   0   -2.20    5.40
   6 -14   0    2.30    7.40
   7 -14   0    1.10    8.60
  -5 -15   0    6.70    7.30
  -4 -15   0   -5.80    5.80
  -4 -15   0   -0.60    5.90
  -3 -15   0    0.40    5.90
  -3 -15   0    4.30    6.20
  -2 -15   0   -0.40    7.10
  -2 -15   0   -3.50    4.40
  -1 -15   0    0.70    6.90
  -1 -15   0    1.10    6.40
   0 -15   0    2.30    6.00
   0 -15   0   -5.70    5.60
   1 -15   0   -0.50    5.80
   1 -15   0    7.50    7.40
   2 -15   0   -3.90    5.20
   2 -15   0   -2.10    6.50
   3 -15   0    1.40    5.50
   3 -15   0   -3.40    6.40
   4 -15   0   -0.40    7.80
   4 -15   0    7.40    6.90
   5 -15   0    0.50    9.00
  -3 -16   0    9.30    7.70
  -3 -16   0    7.90    7.40
  -2 -16   0   -6.70    5.60
  -2 -16   0    0.40    5.00
  -1 -16   0   -2.30    7.30
  -1 -16   0   -8.70    5.90
   0 -16   0    2.70    6.80
   0 -16   0   10.00    8.40
   1 -16   0   -1.50    7.50
   1 -16   0    0.30    6.10
   2 -16   0  -15.70    5.80
   2 -16   0   -8.50    5.40
   3 -16   0   17.30    9.00
   3 -16   0   17.40   11.50
   3 -16   1    3.90    8.40
   3 -16   1   -3.00    6.40
   2 -16   1   11.20    8.20
   2 -16   1   10.00    9.20
   1 -16   1   -6.20    6.60
   1 -16   1   -1.30    6.60
   0 -16   1    7.90    8.10
   0 -16   1   11.60    8.20
  -1 -16   1   23.90   10.30
  -1 -16   1   18.90    8.70
  -2 -16   1    3.30    6.30
  -2 -16   1    3.20    6.40
  -3 -16   1   -5.80    5.50
  -3 -16   1   -2.80    6.10
   5 -15   1  -10.80    6.20
   4 -15   1    6.30    9.90
   3 -15   1   -2.80    7.20
   3 -15   1   10.30    6.50
   2 -15   1    1.00    7.90
   2 -15   1   13.00    7.60
   1 -15   1   -0.60    6.30
   1 -15   1   10.00    7.80
   0 -15   1    1.00    6.70
   0 -15   1   -8.90    5.20
  -1 -15   1   35.30   10.90
  -1 -15   1   17.10    9.40
  -2 -15   1    2.30    4.60
  -2 -15   1    5.70    6.40
  -3 -15   1   17.90    8.90
  -3 -15   1   13.20    8.10
  -4 -15   1   15.40    8.80
  -4 -15   1   17.00    8.40
  -5 -15   1   -3.50    6.10
   7 -14   1   -0.10    7.50
   6 -14   1    0.50    6.60
   5 -14   1    0.40    6.70
   4 -14   1    5.00    5.50
   4 -14   1   -6.80    7.10
   3 -14   1   15.20    9.50
   3 -14   1   21.10    7.40
   2 -14   1   20.30    7.90
   2 -14   1    2.90    8.50
   1 -14   1    6.20    5.90
   1 -14   1   -3.70    6.30
   0 -14   1    5.80    7.50
   0 -14   1    8.40    6.50
  -1 -14   1    6.90    6.70
  -1 -14   1    1.30    6.00
  -2 -14   1   24.50    9.50
  -2 -14   1    3.80    4.20
  -3 -14   1   -2.20    4.20
  -3 -14   1    4.70    5.90
  -4 -14   1   -1.30    5.30
  -4 -14   1   -3.50    4.70
  -5 -14   1   15.10    7.90
  -6 -14   1    4.40    7.30
  -7 -14   1   -6.90    6.30
   8 -13   1    4.60    8.10
   7 -13   1    8.60    8.10
   6 -13   1    3.30    8.40
   5 -13   1    9.50    9.20
   5 -13   1    2.00    4.30
   4 -13   1   48.10    9.70
   4 -13   1   60.59   14.40
   3 -13   1   46.10   12.40
   3 -13   1   78.29   12.20
   2 -13   1   13.40    6.40
   2 -13   1    4.50    7.10
   1 -13   1    2.00    5.50
   1 -13   1   17.50    8.10
   0 -13   1    9.00    6.80
   0 -13   1    4.30    5.40
  -1 -13   1   -2.60    5.10
  -1 -13   1    0.90    5.90
  -2 -13   1   48.90   12.20
  -3 -13   1    2.80    4.90
  -3 -13   1   -3.20    4.40
  -4 -13   1   -4.20    4.50
  -4 -13   1    9.70    6.80
  -5 -13   1    0.00    4.90
  -5 -13   1   10.40    5.20
  -6 -13   1    2.60    6.90
  -7 -13   1    3.20    7.70
  -8 -13   1    2.80    7.70
   9 -12   1    1.20    7.70
   8 -12   1   15.00    9.90
   7 -12   1    0.60    7.00
   6 -12   1   53.29   14.20
   5 -12   1   21.20    9.90
   5 -12   1    6.80    4.80
   4 -12   1    8.60    5.50
   4 -12   1   -3.80    6.10
   3 -12   1    1.80    4.50
   3 -12   1   -5.20    6.40
   2 -12   1   42.90    9.40
   2 -12   1   41.90   11.80
   1 -12   1   89.09   16.00
   1 -12   1   94.29   13.40
   0 -12   1  159.68   18.30
   0 -12   1  176.58   21.00
  -1 -12   1   61.99   12.30
  -1 -12   1   56.09   11.10
  -2 -12   1    6.20    6.20
  -2 -12   1    0.50    3.50
  -3 -12   1   76.99   13.80
  -3 -12   1   61.99   11.00
  -4 -12   1    6.50    6.00
  -4 -12   1   11.60    5.90
  -5 -12   1    5.50    5.90
  -5 -12   1   -1.80    4.40
  -6 -12   1    3.70    5.50
  -7 -12   1   11.70    8.50
  -8 -12   1    6.00    7.00
  -9 -12   1   17.70   11.10
  10 -11   1    6.90    9.90
   9 -11   1   -6.20    6.40
   8 -11   1   19.30    9.40
   7 -11   1    3.30    7.30
   6 -11   1   70.09    9.30
   6 -11   1   66.09   14.80
   5 -11   1   15.30    5.20
   5 -11   1   12.60    8.10
   4 -11   1   25.00    6.20
   4 -11   1   23.10    9.60
   3 -11   1   27.70   10.20
   3 -11   1   30.70    7.00
   2 -11   1  100.89   15.70
   2 -11   1   94.09   12.20
   1 -11   1   19.70    7.50
   1 -11   1    8.70    5.40
   0 -11   1   15.70    6.60
   0 -11   1   15.20    7.20
  -1 -11   1   28.00    8.70
  -1 -11   1    7.80    5.60
  -2 -11   1   -4.10    4.10
  -2 -11   1   -3.40    2.50
  -3 -11   1  239.58   18.50
  -3 -11   1  257.27   24.60
  -4 -11   1   -2.20    2.90
  -4 -11   1    1.70    5.00
  -5 -11   1   52.59    8.50
  -5 -11   1   67.49   12.80
  -6 -11   1    9.30    6.70
  -7 -11   1   36.90   11.80
  -8 -11   1    4.00    6.80
  -9 -11   1    2.20    7.30
 -10 -11   1    7.40    8.10
  11 -10   1   -0.90    7.60
  10 -10   1    6.70    8.00
   9 -10   1   12.60    9.10
   8 -10   1    8.60    7.30
   7 -10   1   73.99   15.80
   6 -10   1   19.70    5.40
   6 -10   1   20.40    9.10
   5 -10   1    7.00    4.20
   5 -10   1   -5.60    5.50
   4 -10   1   85.59   15.60
   4 -10   1   58.59    8.60
   3 -10   1   -1.40    2.30
   3 -10   1    1.50    5.30
   2 -10   1   36.30    7.00
   2 -10   1   27.70    8.90
   1 -10   1   40.70   10.10
   1 -10   1   48.30    8.60
   0 -10   1   24.90    6.90
   0 -10   1   26.50    8.30
  -1 -10   1    5.50    4.50
  -1 -10   1   -1.20    3.80
  -2 -10   1   -0.50    3.90
  -2 -10   1    1.70    3.80
  -3 -10   1    2.20    3.70
  -3 -10   1   -0.10    4.00
  -4 -10   1    5.30    5.00
  -4 -10   1    7.10    4.10
  -5 -10   1   67.59   13.00
  -5 -10   1   69.99    9.00
  -6 -10   1   10.20    3.70
  -6 -10   1   15.90    7.20
  -7 -10   1  234.78   24.80
  -8 -10   1   17.60    8.80
  -9 -10   1    6.80    8.50
   9  10  -1   25.10    8.30
 -10 -10   1   -2.00    5.90
  10  10  -1   20.60    9.30
 -11 -10   1    4.80    8.20
  11  10  -1    7.10    7.50
  11  -9   1   -4.10    6.00
  10  -9   1   -3.10    5.70
   9  -9   1   14.40    9.40
   8  -9   1   -1.90    5.90
   7  -9   1   79.19    8.00
   7  -9   1   83.39   15.90
   6  -9   1   20.90    4.50
   6  -9   1    5.20    6.40
   5  -9   1   71.39    8.30
   5  -9   1   62.99   13.00
   4  -9   1    3.10    2.90
   4  -9   1    0.00    5.40
   3  -9   1   44.60   10.50
   3  -9   1   72.99    8.90
   2  -9   1  112.99   11.50
   2  -9   1  100.29   14.80
   1  -9   1    2.10    3.60
   1  -9   1    0.20    3.00
   0  -9   1   31.70    8.00
   0  -9   1   61.99    9.40
  -1  -9   1    1.70    3.60
  -1  -9   1    7.90    4.70
  -2  -9   1  392.16   23.60
  -2  -9   1  437.46   24.90
  -3  -9   1   -0.20    3.60
  -3  -9   1    0.50    3.20
  -4  -9   1   21.50    7.60
  -4  -9   1   12.60    4.30
  -5  -9   1    1.70    3.00
  -5  -9   1   -4.40    3.70
  -6  -9   1   20.00    7.50
  -6  -9   1   15.90    3.70
  -7  -9   1   64.49   13.10
   7   9  -1   61.19   11.10
  -8  -9   1   62.69   13.70
   8   9  -1   52.59   11.00
  -9  -9   1    9.80    8.40
   9   9  -1   11.30    7.40
 -10  -9   1    0.50    7.20
  10   9  -1    0.10    5.40
 -11  -9   1   -4.40    6.30
  11   9  -1   -0.10    6.10
  12  -8   1    3.30    6.40
  11  -8   1   15.10    8.60
  10  -8   1    0.20    5.90
   9  -8   1   56.49   13.50
   8  -8   1   10.90    6.80
   8  -8   1    2.50    3.10
   7  -8   1    5.90    6.10
   7  -8   1   30.30    4.80
   6  -8   1   21.70    8.40
   6  -8   1   37.50    5.20
   5  -8   1   14.70    3.60
   5  -8   1   19.00    7.60
   4  -8   1   23.90    7.60
   4  -8   1   36.40    5.60
   3  -8   1   36.60    8.70
   3  -8   1   25.80    5.00
   2  -8   1  115.99   11.10
   2  -8   1  149.29   17.20
   1  -8   1    6.30    3.40
   1  -8   1    3.80    3.90
   0  -8   1   44.00    7.50
   0  -8   1   33.90    7.60
  -1  -8   1  278.07   18.40
  -1  -8   1  262.37   17.30
  -2  -8   1   42.40    8.50
  -2  -8   1   29.20    6.50
  -3  -8   1   69.89   10.80
  -3  -8   1   39.00    6.80
  -4  -8   1   18.40    6.00
  -4  -8   1   16.80    4.30
  -5  -8   1    3.30    4.20
  -5  -8   1    2.40    2.30
  -6  -8   1   51.79   10.90
  -6  -8   1   51.89    5.00
   6   8  -1   72.19   11.30
  -7  -8   1   16.10    6.90
   7   8  -1    8.80    5.90
  -8  -8   1   42.50   11.00
   8   8  -1   32.90    9.50
  -9  -8   1   71.39   14.60
   9   8  -1   54.69   11.70
 -10  -8   1    5.60    6.40
  10   8  -1    0.10    5.40
 -11  -8   1   19.60    9.10
  11   8  -1   10.00    6.50
 -12  -8   1   12.00    9.40
  12   8  -1   12.10    8.30
  12  -7   1   -1.00    5.90
  11  -7   1    1.70    6.50
  10  -7   1    5.80    6.40
   9  -7   1   14.70    7.30
   8  -7   1  181.08    9.90
   8  -7   1  193.38   22.10
   7  -7   1    4.90    6.00
   7  -7   1   12.10    3.20
   6  -7   1   44.60   10.20
   6  -7   1   45.80    5.40
   5  -7   1   23.60    4.00
   5  -7   1   23.40    8.20
   4  -7   1  331.07   22.40
   4  -7   1  291.77   14.40
   3  -7   1    5.30    4.50
   3  -7   1    0.70    1.90
   2  -7   1   82.49    8.50
   2  -7   1   55.29    9.60
   1  -7   1  249.97   17.20
   1  -7   1  217.48   13.40
   0  -7   1   44.70    8.00
   0  -7   1   29.10    5.60
  -1  -7   1    2.70    3.00
  -1  -7   1    6.50    3.90
  -2  -7   1  520.75   25.70
  -2  -7   1  526.05   26.60
  -3  -7   1    1.80    2.80
  -3  -7   1    4.00    4.00
  -4  -7   1   52.49    9.10
  -4  -7   1   54.09    6.50
  -5  -7   1  247.18   18.10
  -5  -7   1  254.87   12.30
   5   7  -1  236.48   16.60
  -6  -7   1   32.30    3.00
  -6  -7   1   22.80    7.10
   6   7  -1   34.50    8.30
  -7  -7   1    0.60    4.50
   7   7  -1    2.30    4.70
  -8  -7   1    9.60    7.00
   8   7  -1   21.60    8.00
  -9  -7   1   90.39   15.20
   9   7  -1  111.89   15.60
 -10  -7   1   27.10    9.70
  10   7  -1   37.80   10.10
 -11  -7   1   59.19   14.30
  11   7  -1   76.99   14.10
 -12  -7   1    1.70    7.40
  12   7  -1    7.50    7.40
  13   7  -1   -5.70    6.90
  13  -6   1    0.20    5.90
  13  -6   1    3.10    5.40
  12  -6   1    5.60    6.80
  12  -6   1    5.00    6.20
  11  -6   1    3.60    5.70
  10  -6   1   55.79   11.60
   9  -6   1    5.90    2.90
   9  -6   1    6.70    6.30
   8  -6   1    9.30    2.70
   8  -6   1    8.80    6.20
   7  -6   1   71.99    6.00
   7  -6   1   66.39   12.40
   6  -6   1   -3.90    3.20
   6  -6   1   -1.80    1.40
   5  -6   1  276.37   20.40
   5  -6   1  254.67   12.00
   4  -6   1   10.60    2.90
   4  -6   1    7.90    4.80
   3  -6   1 2251.17   88.79
   3  -6   1 2234.08   78.39
   2  -6   1  125.29    8.20
   2  -6   1  107.59   12.40
   1  -6   1   67.59    7.40
   1  -6   1   64.99    9.00
   0  -6   1   49.60    7.70
   0  -6   1   47.00    6.50
  -1  -6   1  282.07   16.30
  -2  -6   1   54.99    7.10
  -2  -6   1   43.80    7.20
  -3  -6   1  208.98   12.60
  -3  -6   1  250.07   16.10
  -4  -6   1  143.99    8.60
  -4  -6   1  132.89   13.90
   4   6  -1  147.99   13.40
  -5  -6   1   47.30    8.80
  -5  -6   1   42.90    3.90
   5   6  -1   48.40    8.20
  -6  -6   1  159.68   17.40
   6   6  -1  152.88   15.10
  -7  -6   1  394.56   25.30
   7   6  -1  383.16   23.50
  -8  -6   1   21.60    8.00
   8   6  -1   22.40    7.60
  -9  -6   1   82.89   13.90
   9   6  -1   66.19   12.10
 -10  -6   1   69.99   13.70
  10   6  -1   53.39   11.60
 -11  -6   1   -3.00    5.20
  11   6  -1    4.80    6.10
 -12  -6   1   18.10    8.80
  12   6  -1   16.80    8.80
 -13  -6   1   -1.30    6.40
  13   6  -1    2.00    7.80
  13  -5   1    1.80    6.90
  13  -5   1    9.70    6.70
  12  -5   1    4.00    5.80
  12  -5   1   -2.00    5.20
  11  -5   1   -0.30    4.70
  11  -5   1    2.10    5.80
  10  -5   1   76.69   12.70
   9  -5   1   57.39    6.00
   9  -5   1   52.29   11.00
   8  -5   1   34.90    8.70
   8  -5   1   42.70    4.80
   7  -5   1  179.98    8.90
   7  -5   1  163.28   17.30
   6  -5   1  210.08   19.60
   6  -5   1  181.98    8.90
   5  -5   1  262.17   11.50
   5  -5   1  299.57   19.70
   4  -5   1  126.19    6.70
   4  -5   1   98.69   12.40
   3  -5   1  386.26   15.70
   3  -5   1  357.96   21.50
   2  -5   1   83.59    5.90
   2  -5   1   98.09   11.00
   1  -5   1  461.45   20.10
   1  -5   1  491.05   24.20
   0  -5   1    0.90    2.30
   0  -5   1    5.40    2.50
  -1  -5   1   51.69    6.80
  -2  -5   1    7.50    3.30
  -2  -5   1    3.90    2.30
  -3  -5   1  399.96   21.10
  -3  -5   1  388.26   17.50
   3   5  -1  410.96   19.70
  -4  -5   1    8.30    4.00
  -4  -5   1   10.80    2.00
   4   5  -1    6.70    3.60
  -5  -5   1    0.10    2.80
   5   5  -1    6.10    3.80
  -6  -5   1    1.10    3.50
   6   5  -1    3.30    4.30
  -7  -5   1    6.20    5.10
   7   5  -1    0.80    4.30
  -8  -5   1   17.50    7.20
   8   5  -1   29.30    8.20
  -9  -5   1   16.20    7.50
   9   5  -1   36.70    9.50
 -10  -5   1    0.80    5.60
  10   5  -1    2.40    5.00
 -11  -5   1   -1.00    4.70
  11   5  -1   -6.30    5.10
 -12  -5   1    4.70    6.30
  12   5  -1    3.30    6.70
 -13  -5   1   23.00   10.30
  13   5  -1   20.10    9.20
  13  -4   1   -4.90    4.60
  13  -4   1   -0.40    5.80
  12  -4   1    6.20    7.90
  12  -4   1    3.20    4.60
  11  -4   1  119.09   17.40
  11  -4   1  150.98   16.70
  10  -4   1   -0.40    4.50
  10  -4   1    1.70    4.50
 -10   4  -1    2.50    3.10
   9  -4   1  430.56   25.90
  -9   4  -1  405.76   19.20
   8  -4   1  352.26   22.60
  -8   4  -1  335.07   16.00
   7  -4   1   78.49   11.20
  -7   4  -1   82.89    6.20
   6  -4   1   14.50    5.40
  -6   4  -1   17.60    3.00
   5  -4   1   25.00    3.50
   5  -4   1   17.30    5.50
   5  -4   1   26.50    2.90
   4  -4   1   90.89   11.00
   4  -4   1   86.19    5.40
   4  -4   1   86.19    4.70
   3  -4   1    5.10    1.50
   3  -4   1    3.90    1.30
   3  -4   1    2.60    2.90
   2  -4   1   39.90    3.90
   2  -4   1   37.60    6.20
  -2   4  -1   43.30    3.70
   1  -4   1  953.40   39.70
   1  -4   1  973.40   35.50
   0  -4   1    1.30    1.70
   0  -4   1   -1.10    1.70
  -1  -4   1  662.53   27.30
  -2  -4   1  114.19    7.40
  -2  -4   1  135.79    9.50
  -3  -4   1  530.85   20.60
  -3  -4   1  532.75   24.60
   3   4  -1  519.45   23.50
  -4  -4   1  158.58   11.50
  -4  -4   1  147.59    6.30
   4   4  -1  170.98   11.10
  -5  -4   1   58.09    8.90
   5   4  -1   44.00    7.20
  -6  -4   1  109.79   13.10
   6   4  -1  175.38   15.30
  -7  -4   1   67.09   10.20
   7   4  -1   75.99   10.80
  -8  -4   1   55.69   10.40
   8   4  -1   74.19   11.50
  -9  -4   1   53.39   11.10
   9   4  -1   47.70   10.30
 -10  -4   1   36.90    9.90
  10   4  -1   43.70   10.10
 -11  -4   1   -1.80    4.70
  11   4  -1    6.60    6.50
 -12  -4   1    2.70    5.80
  12   4  -1    6.40    6.70
 -13  -4   1    1.60    6.10
  13   4  -1    1.90    6.40
  14  -3   1    6.80    8.60
  13  -3   1   36.60   11.20
  12  -3   1   11.10    5.80
  12  -3   1    9.70    7.40
  11  -3   1   34.40    9.60
  11  -3   1   35.80    8.20
 -11   3  -1   58.59    8.30
  10  -3   1   25.10    8.10
  10  -3   1   37.70    8.10
 -10   3  -1   23.40    5.30
   9  -3   1   13.70    6.10
   9  -3   1    1.40    4.10
  -9   3  -1    1.40    2.70
   8  -3   1    1.30    3.70
  -8   3  -1   -0.50    2.10
   7  -3   1  166.28   15.30
  -7   3  -1  175.28   10.20
   6  -3   1  112.79   12.20
  -6   3  -1  105.19    6.90
   5  -3   1    4.60    2.20
   5  -3   1    2.20    3.10
  -5   3  -1    5.10    1.90
   4  -3   1    2.50    1.50
   4  -3   1    0.50    2.10
  -4   3  -1    3.50    1.30
   3  -3   1   56.89    3.20
   3  -3   1   61.29    7.80
   3  -3   1   62.39    3.80
   2  -3   1   53.19    7.00
   2  -3   1   38.00    3.00
  -2   3  -1   32.90    2.40
   1  -3   1  714.83   29.30
   1  -3   1  692.13   25.50
  -1   3  -1  694.03   25.20
   0  -3   1 2256.77   79.29
   0  -3   1 2153.88   75.69
   0   3  -1 2156.38   75.39
  -1  -3   1 2124.69   86.29
  -1  -3   1 2626.04   85.39
   1   3  -1 2582.54   87.09
  -2  -3   1  377.46   14.90
  -2  -3   1  372.96   17.40
   2   3  -1  354.86   16.30
  -3  -3   1  190.68    7.70
  -3  -3   1  198.28   11.70
   3   3  -1  203.38   11.20
  -4  -3   1   88.49    9.60
   4   3  -1   86.39    9.00
  -5  -3   1   17.40    4.90
   5   3  -1    9.40    3.90
  -6  -3   1    2.50    3.50
   6   3  -1    5.20    3.60
  -7  -3   1  207.28   18.30
   7   3  -1  232.38   16.10
  -8  -3   1  207.08   19.00
   8   3  -1  206.08   19.20
  -9  -3   1    2.30    4.40
   9   3  -1   -2.90    3.30
 -10  -3   1   29.90    8.70
  10   3  -1   33.00    9.50
 -11  -3   1   17.50    7.50
  11   3  -1    4.60    6.10
 -12  -3   1    1.80    5.30
  12   3  -1    8.80    7.10
 -13  -3   1   12.20    7.80
  13   3  -1   13.80    7.90
  14   3  -1   -1.50    6.90
  14  -2   1    2.10    8.00
  13  -2   1   -2.20    5.70
  12  -2   1    5.60    6.10
  12  -2   1    3.90    4.30
  11  -2   1    0.20    3.50
  11  -2   1   -1.60    4.40
 -11   2  -1    0.40    3.50
  10  -2   1   18.50    5.90
  10  -2   1   15.00    6.90
 -10   2  -1   20.50    5.50
   9  -2   1   61.89   11.10
   9  -2   1   70.49    9.20
  -9   2  -1   65.69    8.50
   8  -2   1    6.90    4.70
   8  -2   1   12.30    4.60
  -8   2  -1   10.50    4.00
   7  -2   1  282.77   18.10
   7  -2   1  274.17   16.70
  -7   2  -1  263.37   14.00
   6  -2   1   67.29    8.70
  -6   2  -1  100.29    7.00
   5  -2   1  649.14   29.50
  -5   2  -1  681.33   25.80
   4  -2   1   16.20    3.70
   4  -2   1   15.20    2.50
  -4   2  -1   26.60    3.20
   3  -2   1   30.50    5.00
   3  -2   1   44.70    3.40
  -3   2  -1   38.50    2.80
   2  -2   1 1408.26   47.70
   2  -2   1 1399.76   53.09
   2  -2   1 1422.76   47.40
   1  -2   1 7789.92  256.07
   1  -2   1 7747.72  266.87
  -1   2  -1 7504.25  266.77
  -1   2  -1 7812.82  256.67
   0  -2   1  528.85   20.30
   0  -2   1  559.14   21.80
   0   2  -1  539.65   20.20
   0   2  -1  568.44   21.90
  -1  -2   1  869.21   31.60
  -1  -2   1  876.81   31.90
  -1  -2   1  883.11   32.20
   1   2  -1  872.11   31.80
   1   2  -1  845.82   31.90
  -2  -2   1 1024.40   37.80
  -2  -2   1 1011.40   35.20
   2   2  -1  992.50   37.50
   2   2  -1 1006.60   35.60
  -3  -2   1    7.00    2.70
   3   2  -1   14.40    3.30
  -4  -2   1  542.35   24.10
   4   2  -1  537.25   23.80
  -5  -2   1  319.27   17.50
   5   2  -1  340.07   18.10
  -6  -2   1    7.30    3.80
   6   2  -1    0.60    3.60
  -7  -2   1   41.10    7.80
   7   2  -1   39.60    3.20
   7   2  -1   42.70    3.80
   7   2  -1   49.99    9.10
  -8  -2   1    1.40    3.30
   8   2  -1   -0.70    1.20
   8   2  -1   -3.90    3.40
   8   2  -1   -0.10    1.80
  -9  -2   1   42.70    9.20
   9   2  -1   49.80    4.00
   9   2  -1   63.39   11.50
   9   2  -1   53.99    5.00
 -10  -2   1   16.10    6.80
  10   2  -1   11.20    6.70
 -11  -2   1   -2.10    4.00
  11   2  -1    6.70    6.80
 -12  -2   1   -1.40    3.50
  12   2  -1    2.40    5.90
 -13  -2   1   -2.90    4.20
  13   2  -1   -0.10    7.10
 -14  -2   1   -0.30    6.10
  14   2  -1  -12.00    4.70
  14  -1   1    0.50    7.30
  13  -1   1    0.30    6.00
  12  -1   1    2.10    5.00
 -12   1  -1   -3.60    3.90
  11  -1   1    9.70    7.10
  11  -1   1   16.70    5.20
 -11   1  -1   21.20    6.10
  10  -1   1    8.30    3.90
  10  -1   1   10.00    6.20
 -10   1  -1    4.40    4.00
   9  -1   1   14.00    4.60
   9  -1   1   32.00    8.30
  -9   1  -1   29.70    6.40
   8  -1   1   -0.70    3.90
   8  -1   1    2.10    2.70
  -8   1  -1    2.40    3.00
   7  -1   1   62.79    7.70
   7  -1   1   83.49   11.20
  -7   1  -1   55.59    7.30
   6  -1   1  547.45   26.80
   6  -1   1  547.65   24.70
  -6   1  -1  556.24   23.70
   5  -1   1  312.17   17.00
   5  -1   1  299.77   15.50
  -5   1  -1  310.47   14.30
   4  -1   1    3.60    1.80
   4  -1   1    4.00    1.70
  -4   1  -1    4.80    1.80
   3  -1   1 1074.39   40.70
   3  -1   1 1055.49   37.70
  -3   1  -1 1089.09   37.70
   2  -1   1  323.67   12.00
   2  -1   1  326.17   14.30
  -2   1  -1  306.67   14.40
  -2   1  -1  352.76   12.10
   1  -1   1  298.17   12.60
  -1   1  -1  291.17   12.70
   0  -1   1  553.24   20.90
   0  -1   1  588.34   20.10
   0   1  -1  574.04   20.10
   0   1  -1  568.74   21.00
  -1  -1   1  819.92   29.20
  -1  -1   1  796.22   29.10
  -1  -1   1  833.62   28.40
   1   1  -1  813.02   29.20
   1   1  -1  817.22   28.50
   1   1  -1  796.32   29.10
  -2  -1   1 1022.20   38.10
  -2  -1   1 1002.50   37.80
   2   1  -1 1100.69   38.40
   2   1  -1 1086.49   36.10
   2   1  -1  984.50   37.70
  -3  -1   1 1240.08   46.20
   3   1  -1 1275.17   46.90
  -4  -1   1  624.44   26.60
   4   1  -1  647.14   24.00
   4   1  -1  643.64   27.10
  -5  -1   1   29.90    5.40
   5   1  -1   67.59    7.80
   5   1  -1   40.70    4.10
  -6  -1   1  198.18   12.90
   6   1  -1  194.78   13.70
   6   1  -1  177.68    9.40
  -7  -1   1    2.40    3.00
   7   1  -1   -6.40    2.80
   7   1  -1    0.50    1.60
  -8  -1   1   28.50    7.00
   8   1  -1   33.30    4.40
   8   1  -1   35.60    8.40
  -9  -1   1    1.40    2.20
   9   1  -1    4.80    5.40
   9   1  -1    3.40    2.30
 -10  -1   1   -2.50    3.00
  10   1  -1   -2.00    4.70
  10   1  -1    0.90    2.20
 -11  -1   1    4.40    4.40
  11   1  -1    5.90    5.80
 -12  -1   1    2.20    4.90
  12   1  -1   -2.20    4.90
 -13  -1   1    4.10    5.60
  13   1  -1   -7.50    6.20
 -14  -1   1    9.90    6.70
  14   1  -1   12.40    9.90
  14   0   1   -4.30    6.20
  13   0   1   26.10   10.70
 -13   0  -1   26.10    8.00
  12   0   1   -5.50    4.30
 -12   0  -1   -3.50    3.50
  11   0   1   19.30    5.00
  11   0   1    9.30    6.90
 -11   0  -1   10.40    5.30
  10   0   1    1.80    2.70
  10   0   1   -6.30    4.20
 -10   0  -1   -0.70    3.60
   9   0   1  165.28   18.20
   9   0   1  214.78   12.40
  -9   0  -1  217.78   15.20
   8   0   1    1.30    2.10
   8   0   1   -1.30    3.30
  -8   0  -1    1.70    2.80
   7   0   1  129.79   13.60
   7   0   1  125.99    8.90
  -7   0  -1  169.08   11.20
   6   0   1    3.80    2.00
   6   0   1    9.70    3.90
  -6   0  -1    1.80    2.40
   5   0   1  904.21   37.30
   5   0   1  874.71   34.20
  -5   0  -1  896.51   34.70
   4   0   1   -0.30    1.00
   4   0   1    1.30    1.80
  -4   0  -1   -0.40    1.20
  -4   0  -1   -0.10    1.30
   3   0   1 2426.76   85.99
   3   0   1 2379.16   82.59
   3   0   1 2425.56   84.49
  -3   0  -1 2331.77   82.59
  -3   0  -1 2454.45   85.29
   2   0   1   -0.60    0.80
   2   0   1   -0.60    0.60
   2   0   1    0.30    0.90
  -2   0  -1    0.50    0.80
  -2   0  -1   -1.60    0.60
   1   0   1  600.54   20.90
   1   0   1  592.74   21.70
   1   0   1  605.74   22.10
  -1   0  -1  630.54   22.10
  -1   0  -1  588.74   21.70
   0   0   1   -0.10    0.20
   0   0   1    0.20    0.20
   0   0  -1    0.00    0.20
   0   0  -1    0.00    0.20
  -1   0   1  356.36   13.70
   1   0  -1  366.76   13.80
   1   0  -1  363.76   13.80
  -2   0   1   -3.50    1.00
   2   0  -1   -2.70    1.00
  -3   0   1   67.59    6.20
   3   0  -1   81.99    6.90
  -4   0   1    1.00    1.50
   4   0  -1   -0.20    1.80
   4   0  -1   -2.60    1.10
   5   0  -1   45.90    6.50
   5   0  -1   56.09    6.10
  -6   0   1    0.40    1.40
   6   0  -1   -0.20    2.20
   6   0  -1    0.90    2.00
   7   0  -1 1090.29   45.50
   7   0  -1 1027.10   41.50
  -8   0   1   -0.50    2.80
   8   0  -1    2.00    4.20
   8   0  -1   -0.80    2.30
  -9   0   1    0.40    2.80
   9   0  -1   -0.40    2.50
   9   0  -1   -3.60    3.40
 -10   0   1    1.60    3.80
  10   0  -1   -3.20    3.00
  10   0  -1   -2.00    2.40
 -11   0   1   74.69   11.40
  11   0  -1   56.99   12.30
  11   0  -1   56.49    7.40
 -12   0   1   -3.70    4.00
  12   0  -1   -1.20    5.90
 -13   0   1   -0.80    4.70
  13   0  -1    2.20    6.70
 -14   0   1    5.70    6.30
  14   0  -1   -7.20    5.10
  14   1   1   -2.50    7.20
  13   1   1   -2.60    7.20
 -13  -1  -1    2.90    5.30
  12   1   1   -3.70    5.60
 -12  -1  -1   -6.20    3.50
  11   1   1   26.60    9.60
 -11  -1  -1   15.80    6.10
  10   1   1   11.70    3.50
  10   1   1   18.30    7.50
 -10  -1  -1   11.70    5.30
   9   1   1   32.10    4.80
   9   1   1   32.50    8.60
  -9  -1  -1   28.20    7.00
   8   1   1    2.40    2.00
   8   1   1   -4.00    2.80
  -8  -1  -1   -4.50    2.40
   7   1   1   49.80    8.70
   7   1   1   70.89    6.00
  -7  -1  -1   64.99    8.80
   6   1   1  533.35   26.00
   6   1   1  503.95   20.60
   5   1   1  297.97   12.90
   5   1   1  321.47   17.20
  -5  -1  -1  307.77   14.10
   4   1   1    4.50    2.30
   4   1   1    3.70    1.20
  -4  -1  -1    1.60    1.30
  -4  -1  -1    1.00    1.30
   3   1   1 1066.59   39.50
   3   1   1 1027.00   36.10
  -3  -1  -1 1024.20   36.50
  -3  -1  -1  952.10   37.70
   2   1   1  324.17   12.00
   2   1   1  317.97   13.30
   2   1   1  305.47   13.90
  -2  -1  -1  335.87   13.60
  -2  -1  -1  306.17   11.80
   1   1   1  287.87   11.60
   1   1   1  269.57   11.30
   1   1   1  297.77   12.00
  -1  -1  -1  280.07   11.20
  -1  -1  -1  301.87   12.00
  -1  -1  -1  301.17   11.80
   0   1   1  557.24   19.80
   0  -1  -1  569.94   19.80
  -1   1   1  866.11   31.00
   1  -1  -1  916.81   31.20
  -3   1   1  771.62   28.90
  -4   1   1  648.74   25.90
   4  -1  -1  665.73   27.90
  -5   1   1   32.60    5.00
   5  -1  -1   40.40    5.90
  -6   1   1  187.68   11.60
   6  -1  -1  181.28   12.30
   6  -1  -1  213.18   13.90
  -7   1   1   -3.30    1.90
   7  -1  -1    1.20    2.60
   7  -1  -1   -3.20    2.70
  -8   1   1   20.80    5.20
   8  -1  -1   23.80    6.50
   8  -1  -1   20.40    5.40
  -9   1   1    2.40    3.50
   9  -1  -1    3.80    4.40
   9  -1  -1    3.10    3.30
 -10   1   1   -0.30    2.90
  10  -1  -1    0.10    3.00
  10  -1  -1    2.50    4.80
 -11   1   1    7.50    4.70
  11  -1  -1    1.90    3.60
  11  -1  -1   -2.70    5.10
 -12   1   1    3.20    4.70
  12  -1  -1    2.00    5.90
 -13   1   1   -4.20    4.30
  13  -1  -1    3.90    6.80
  14  -1  -1   18.40    9.70
  14   2   1   -5.30    5.70
  13   2   1  -11.20    6.30
 -13  -2  -1    4.00    6.50
  12   2   1    5.70    6.90
 -12  -2  -1    1.60    5.30
  11   2   1    5.50    6.70
 -11  -2  -1   12.80    6.20
  10   2   1   18.20    7.70
  10   2   1   18.90    3.40
 -10  -2  -1    4.90    4.50
   9   2   1   68.49   12.10
   9   2   1   71.09    5.70
   8   2   1    8.30    2.20
   8   2   1    1.70    4.90
  -8  -2  -1    5.90    4.20
   7   2   1  258.07   18.20
   7   2   1  266.77   11.60
  -7  -2  -1  288.47   17.40
   6   2   1   85.39   10.80
   6   2   1   70.59    4.40
  -6  -2  -1   58.29    8.50
   5   2   1  657.73   29.40
   5   2   1  611.84   23.30
  -5  -2  -1  675.33   28.40
  -5  -2  -1  626.04   24.10
   4   2   1   19.70    2.20
   4   2   1   15.50    4.00
  -4  -2  -1   16.40    3.80
  -4  -2  -1   20.90    2.20
   3   2   1   42.90    3.10
  -3  -2  -1   37.20    2.40
  -3  -2  -1   41.30    5.40
   2   2   1 1298.67   49.00
  -2  -2  -1 1368.06   48.40
  -2  -2  -1 1335.47   47.10
   1   2   1 7796.22  260.67
   1   2   1 7584.74  254.77
  -1  -2  -1 7478.55  254.87
   0  -2  -1  533.65   19.90
  -1   2   1  924.01   31.60
   1  -2  -1  884.11   31.60
  -2   2   1  867.91   34.50
   2  -2  -1 1098.49   35.20
  -3   2   1   21.00    3.00
   3  -2  -1   22.20    3.30
  -4   2   1  582.64   22.70
   4  -2  -1  537.85   25.70
  -5   2   1  341.17   15.70
   5  -2  -1  312.57   18.10
  -6   2   1   11.90    3.80
   6  -2  -1    7.70    3.90
  -7   2   1   42.30    6.60
   7  -2  -1   45.80    7.90
  -8   2   1   -1.30    2.50
   8  -2  -1   -3.60    2.50
   8  -2  -1   -3.50    2.60
  -9   2   1   44.40    8.00
   9  -2  -1   54.69    8.60
   9  -2  -1   51.29   10.10
 -10   2   1   22.50    6.00
  10  -2  -1   14.90    6.60
  10  -2  -1   21.10    6.40
 -11   2   1    5.80    3.90
  11  -2  -1   -0.90    5.20
  11  -2  -1    4.20    4.60
 -12   2   1   -1.40    3.80
  12  -2  -1   -4.80    3.30
  12  -2  -1   -1.00    5.10
  13  -2  -1    2.40    5.50
  14  -2  -1    0.70    6.70
  14   3   1    0.00    7.60
  13   3   1   30.60   11.70
 -13  -3  -1   30.30   10.10
  12   3   1   10.10    7.60
 -12  -3  -1    0.70    3.70
  11   3   1   37.50   10.70
 -11  -3  -1   32.40    9.40
  10   3   1   24.60    8.70
 -10  -3  -1   25.60    7.70
   9   3   1    5.50    5.80
  -9  -3  -1   -0.50    4.30
   8   3   1    3.20    4.40
  -8  -3  -1    7.70    4.90
   7   3   1  184.48   17.30
  -7  -3  -1  170.28   16.10
   6   3   1  103.19   11.70
  -6  -3  -1  104.99   12.00
   5   3   1    6.10    3.70
  -5  -3  -1    6.10    3.50
  -4  -3  -1    2.20    0.90
  -4  -3  -1    1.20    2.40
   3   3   1   55.39    6.70
  -3  -3  -1   60.09    6.90
  -3  -3  -1   55.19    3.80
   2   3   1   31.30    4.70
  -2  -3  -1   20.80    3.70
   0  -3  -1 2136.09   73.99
  -1   3   1 2727.43   93.19
   1  -3  -1 2769.62   93.59
  -2   3   1  375.36   14.60
   2  -3  -1  366.46   14.60
   3  -3  -1  202.88    9.00
   3  -3  -1  186.58   12.80
  -4   3   1   99.89    6.40
   4  -3  -1   83.19    9.70
  -5   3   1    9.60    2.80
   5  -3  -1   10.40    4.50
  -6   3   1   12.00    3.30
   6  -3  -1    4.10    3.70
  -7   3   1  225.98   13.30
   7  -3  -1  260.67   17.50
  -8   3   1  219.78   13.50
   8  -3  -1  199.78   18.40
  -9   3   1   -3.30    2.50
   9  -3  -1   -1.20    3.60
   9  -3  -1    0.20    4.20
 -10   3   1   34.40    6.60
  10  -3  -1   34.80    8.00
  10  -3  -1   33.70    8.60
 -11   3   1    8.60    4.60
  11  -3  -1   16.30    7.60
  11  -3  -1    7.10    5.40
 -12   3   1    3.80    4.30
  12  -3  -1    5.40    6.20
  12  -3  -1    2.20    4.40
  13  -3  -1    5.20    6.70
  14  -3  -1   -9.60    5.90
  13   4   1   12.50    8.60
 -13  -4  -1    5.30    6.20
  12   4   1    2.50    5.70
 -12  -4  -1    6.00    6.30
  11   4   1  122.89   18.40
 -11  -4  -1  139.49   18.50
  10   4   1   -1.80    4.20
 -10  -4  -1    2.10    5.30
   9   4   1  427.06   27.20
  -9  -4  -1  420.26   26.40
   8   4   1  317.57   21.30
  -8  -4  -1  299.77   20.80
   7   4   1   70.79   11.00
  -7  -4  -1   83.49   11.80
   6   4   1   17.40    5.60
  -6  -4  -1    7.60    4.10
   5   4   1    7.50    4.20
  -5  -4  -1   15.80    4.60
   4   4   1   89.79    9.80
  -4  -4  -1   88.29    5.20
  -4  -4  -1   98.19   10.80
   3   4   1    3.80    2.70
  -3  -4  -1    3.40    2.40
  -3  -4  -1    3.10    1.70
   2   4   1   37.50    5.40
  -2  -4  -1   33.00    5.30
  -1  -4  -1  974.70   37.60
   0  -4  -1    1.60    1.70
   1  -4  -1  682.53   26.30
   2  -4  -1  133.19    7.20
   3  -4  -1  538.55   20.80
   3  -4  -1  536.95   26.90
   4  -4  -1  181.28   16.50
   4  -4  -1  176.08    8.70
   5  -4  -1   49.80    8.70
   5  -4  -1   49.99    4.90
  -6   4   1  141.99    8.90
   6  -4  -1  147.79   15.70
  -7   4   1   71.09    7.60
   7  -4  -1   71.49   11.60
  -8   4   1   61.59    7.60
   8  -4  -1   63.79   11.30
  -9   4   1   58.59    8.10
   9  -4  -1   62.59   11.40
 -10   4   1   48.00    7.50
  10  -4  -1   42.30    9.90
  10  -4  -1   33.00    8.90
 -11   4   1    8.50    4.60
  11  -4  -1    4.90    5.50
  11  -4  -1    4.00    5.80
  12  -4  -1    3.80    6.30
  12  -4  -1    4.60    5.70
  13  -4  -1    3.80    7.00
  13  -4  -1    0.50    5.70
  13   5   1    8.40    7.90
 -13  -5  -1   -2.70    5.60
  12   5   1    0.40    6.40
 -12  -5  -1   -0.70    5.80
  11   5   1   -3.90    5.70
 -11  -5  -1    1.40    5.80
  10   5   1   49.60   10.90
 -10  -5  -1   60.79   11.60
   9   5   1   42.30   10.30
  -9  -5  -1   55.49   11.40
   8   5   1   46.00    9.70
  -8  -5  -1   36.30    8.80
   7   5   1  149.09   15.70
  -7  -5  -1  192.78   18.10
   6   5   1  179.28   16.60
  -6  -5  -1  186.68   17.70
   5   5   1  267.37   16.80
  -5  -5  -1  264.27   11.10
  -5  -5  -1  273.97   17.60
  -5  -5  -1  264.17   11.60
   4   5   1  120.19   11.70
  -4  -5  -1  109.29   12.40
  -4  -5  -1  121.09    7.50
   3   5   1  467.05   21.10
  -3  -5  -1  348.87   20.50
  -2  -5  -1   88.69    9.50
  -1  -5  -1  461.35   21.40
   0  -5  -1   11.00    3.10
   1  -5  -1   58.79    6.30
   2  -5  -1    9.40    4.30
   2  -5  -1    4.10    2.10
   3  -5  -1  400.66   17.20
   3  -5  -1  436.76   24.00
   4  -5  -1   10.30    5.10
   4  -5  -1   13.70    2.70
   5  -5  -1    1.30    3.10
   5  -5  -1    2.30    1.70
   6  -5  -1    2.00    3.80
   6  -5  -1    3.10    2.10
   7  -5  -1    6.80    5.10
   7  -5  -1    8.10    2.90
  -8   5   1   25.90    5.00
   8  -5  -1   21.80    8.20
  -9   5   1   22.00    4.80
   9  -5  -1   19.10    7.70
 -10   5   1    1.80    3.20
  10  -5  -1   -2.80    4.70
  11  -5  -1    2.10    5.00
  11  -5  -1    6.30    6.40
  12  -5  -1    9.70    6.80
  12  -5  -1    8.40    6.70
  13  -5  -1   13.00    8.10
  13  -5  -1   25.80    8.90
  13   6   1    8.30    8.60
 -13  -6  -1   -1.80    6.00
  12   6   1   -3.10    5.00
 -12  -6  -1   -1.40    7.20
  11   6   1    9.00    7.30
 -11  -6  -1   -4.40    4.90
  10   6   1   75.69   14.00
 -10  -6  -1   39.10   10.80
   9   6   1    7.10    6.10
  -9  -6  -1   19.80    7.70
   8   6   1   12.40    6.80
  -8  -6  -1    4.10    5.30
   7   6   1   81.99   12.40
  -7  -6  -1   91.99   13.80
   6   6   1    3.90    4.20
  -6  -6  -1   -2.20    3.40
  -5  -6  -1  211.68   11.00
  -5  -6  -1  246.08   17.40
  -5  -6  -1  218.38   11.20
   4   6   1   14.20    4.50
  -4  -6  -1    5.60    3.90
  -4  -6  -1    9.70    3.00
  -3  -6  -1 2193.58   82.69
  -2  -6  -1  130.59   12.60
  -1  -6  -1   73.99    9.00
   0  -6  -1   40.00    5.80
   1  -6  -1  449.36   23.80
   1  -6  -1  397.36   19.10
   2  -6  -1   47.40    6.00
   2  -6  -1   42.60    8.40
   3  -6  -1  251.87   22.00
   3  -6  -1  231.08   12.20
   4  -6  -1  158.88   17.10
   4  -6  -1  172.28    9.60
   5  -6  -1   41.20    5.00
   5  -6  -1   39.30    9.50
   6  -6  -1  134.29   17.20
   6  -6  -1  163.38    9.40
   7  -6  -1  442.86   28.60
   7  -6  -1  403.86   18.20
   8  -6  -1   25.80    4.60
   8  -6  -1   24.00    8.20
   9  -6  -1   94.29    8.60
   9  -6  -1   76.89   14.10
  10  -6  -1   60.79    7.20
  10  -6  -1   56.09   12.30
  11  -6  -1    0.30    5.00
  12  -6  -1   20.90    9.00
  12  -6  -1   15.60    8.40
  13  -6  -1    5.00    7.30
  13  -6  -1   13.10    8.00
  12   7   1    3.10    7.70
 -12  -7  -1    1.10    6.40
  11   7   1   -1.10    4.90
 -11  -7  -1    0.80    5.30
  10   7   1   12.60    7.50
 -10  -7  -1    2.10    5.90
   9   7   1   16.30    7.00
  -9  -7  -1   14.90    7.30
   8   7   1  158.08   18.30
  -8  -7  -1  162.58   19.90
   7   7   1    8.30    5.80
  -7  -7  -1   11.60    6.10
   6   7   1   55.19    9.80
  -6  -7  -1   37.90    4.10
  -6  -7  -1   44.50   10.00
  -6  -7  -1   45.30    4.60
   5   7   1   16.70    5.50
  -5  -7  -1   19.30    6.70
  -5  -7  -1   23.70    4.30
  -4  -7  -1  281.07   15.70
  -4  -7  -1  291.57   19.20
  -3  -7  -1    3.40    4.00
  -3  -7  -1    2.20    2.70
  -2  -7  -1   55.09    8.50
  -2  -7  -1   58.39    8.60
  -1  -7  -1  253.97   15.70
  -1  -7  -1  235.98   16.20
   0  -7  -1   31.10    6.80
   0  -7  -1   40.50    6.20
   1  -7  -1    1.20    3.60
   1  -7  -1    3.20    2.60
   2  -7  -1  532.95   24.00
   2  -7  -1  551.74   30.40
   3  -7  -1    1.00    2.40
   3  -7  -1   -3.70    3.50
   4  -7  -1   71.59   12.30
   4  -7  -1   65.59    7.10
   5  -7  -1  284.37   14.40
   5  -7  -1  285.27   26.50
   6  -7  -1   30.40    9.20
   6  -7  -1   35.00    5.10
   7  -7  -1   -3.20    4.80
   7  -7  -1    0.70    2.40
   8  -7  -1   18.00    4.00
   8  -7  -1   10.40    7.80
   9  -7  -1  112.19    9.60
   9  -7  -1  113.79   17.60
  10  -7  -1   57.89   13.50
  11  -7  -1   50.49   12.50
  12  -7  -1    8.60    8.40
  13  -7  -1   -1.20    5.20
  12   8   1    1.80    7.40
 -12  -8  -1    4.50    7.90
  11   8   1    9.70    8.30
 -11  -8  -1   26.70   10.90
  10   8   1    3.40    6.90
 -10  -8  -1    1.40    6.50
   9   8   1   51.59   11.90
  -9  -8  -1   50.39   12.10
   8   8   1    3.50    5.00
  -8  -8  -1   -7.00    3.70
   7   8   1   11.10    6.40
  -7  -8  -1   28.70    8.70
   6   8   1   17.60    6.60
  -6  -8  -1   30.50    8.70
  -6  -8  -1   16.80    3.70
  -5  -8  -1    6.80    5.10
  -5  -8  -1   17.00    4.20
  -4  -8  -1   31.60    6.10
  -4  -8  -1   34.80    8.70
  -3  -8  -1   25.80    6.00
  -3  -8  -1   24.50    6.90
  -2  -8  -1   91.99   12.00
  -2  -8  -1  106.19   12.00
  -1  -8  -1   15.20    5.00
  -1  -8  -1    8.50    4.90
   0  -8  -1   41.00    7.00
   0  -8  -1   30.40    7.20
   1  -8  -1  295.07   20.60
   1  -8  -1  255.47   15.90
   2  -8  -1   38.40    6.30
   2  -8  -1   26.20    8.20
   3  -8  -1   54.59    7.30
   3  -8  -1   53.29   10.50
   4  -8  -1   23.90    7.90
   4  -8  -1   12.60    4.10
   5  -8  -1   -1.90    4.20
   5  -8  -1   -1.60    2.20
   6  -8  -1   52.89    6.90
   6  -8  -1   51.89   12.10
   7  -8  -1    9.70    7.30
   7  -8  -1    7.80    3.70
   8  -8  -1   34.20    5.80
   8  -8  -1   62.09   13.50
   9  -8  -1   94.79    9.20
   9  -8  -1   90.89   17.40
  10  -8  -1   -0.20    5.70
  11  -8  -1   11.60    8.10
  12  -8  -1   22.50   10.20
  11   9   1    7.30    6.60
 -11  -9  -1   -1.30    7.70
  10   9   1    7.20    6.20
 -10  -9  -1    9.40    7.60
   9   9   1   14.30    7.20
  -9  -9  -1    3.20    5.60
   8   9   1    6.00    5.80
  -8  -9  -1    0.20    5.10
   7   9   1   59.49   11.20
  -7  -9  -1   59.29   11.80
  -6  -9  -1    8.60    5.90
  -6  -9  -1    9.60    3.70
  -5  -9  -1   40.70    6.80
  -5  -9  -1   79.99   13.00
  -4  -9  -1    3.70    4.50
  -4  -9  -1    0.70    3.20
  -3  -9  -1   62.09    9.70
  -3  -9  -1   79.29   11.80
  -2  -9  -1   82.79   11.80
  -2  -9  -1   88.89   12.50
  -1  -9  -1    2.50    3.70
  -1  -9  -1   -1.30    2.90
   0  -9  -1   61.49    9.40
   0  -9  -1   48.40    9.90
   1  -9  -1    1.30    3.10
   1  -9  -1    1.70    4.20
   2  -9  -1  476.25   29.80
   2  -9  -1  455.45   23.50
   3  -9  -1   -1.50    2.50
   3  -9  -1    2.40    5.70
   4  -9  -1    6.80    5.90
   4  -9  -1   22.60    5.40
   5  -9  -1    1.10    5.20
   5  -9  -1   -9.50    2.20
   6  -9  -1    7.40    6.20
   6  -9  -1    8.00    4.00
   7  -9  -1   59.19   13.50
   7  -9  -1   80.89    9.20
   8  -9  -1   69.99   15.90
   8  -9  -1   62.99    8.10
   9  -9  -1   10.20    8.70
  10  -9  -1    1.90    6.60
  11  -9  -1   -2.30    6.50
  11  10   1   -1.70    5.60
 -11 -10  -1   -6.80    6.10
  10  10   1   11.30    8.00
 -10 -10  -1   17.10    8.40
   9  10   1   -4.50    5.10
  -9 -10  -1   10.60    7.70
  -8 -10  -1    9.90    7.00
  -7 -10  -1   61.69   13.30
  -6 -10  -1   10.10    6.10
  -6 -10  -1   14.70    4.40
  -5 -10  -1   -0.60    4.80
  -5 -10  -1    2.50    3.30
  -4 -10  -1   65.49    9.70
  -4 -10  -1   53.29   11.50
  -3 -10  -1   -1.80    3.40
  -3 -10  -1    3.70    4.80
  -2 -10  -1   24.50    7.20
  -2 -10  -1   26.90    7.50
  -1 -10  -1   60.19   11.20
  -1 -10  -1   47.40    9.50
   0 -10  -1   23.20    6.70
   0 -10  -1   15.10    7.30
   1 -10  -1   -6.40    4.30
   1 -10  -1   -1.60    3.00
   2 -10  -1   12.30    7.20
   2 -10  -1    2.70    3.60
   3 -10  -1    4.40    6.10
   3 -10  -1   -0.60    3.00
   4 -10  -1    6.90    6.50
   4 -10  -1    2.60    3.40
   5 -10  -1   42.80   11.70
   5 -10  -1   60.99    8.70
   6 -10  -1   14.10    4.60
   6 -10  -1    7.20    7.20
   7 -10  -1  241.28   27.50
   7 -10  -1  246.88   15.50
   8 -10  -1   29.10   10.90
   9 -10  -1   12.90    9.60
  10 -10  -1    3.50    8.00
  11 -10  -1   14.80    9.40
 -10 -11  -1   23.00   10.40
  -9 -11  -1   -1.00    5.50
  -8 -11  -1   30.90   10.30
  -7 -11  -1   -4.70    4.50
  -6 -11  -1   77.29   14.50
  -5 -11  -1   10.80    6.30
  -5 -11  -1    9.00    4.70
  -4 -11  -1    4.30    5.50
  -4 -11  -1   21.40    6.20
  -3 -11  -1   38.30    9.60
  -3 -11  -1   28.30    7.90
  -2 -11  -1   85.49   13.70
  -1 -11  -1   10.40    6.70
  -1 -11  -1    9.80    6.50
   0 -11  -1    6.20    5.10
   0 -11  -1   14.70    7.80
   1 -11  -1   18.90    6.50
   1 -11  -1   20.40    8.60
   2 -11  -1   -9.10    4.60
   2 -11  -1   -2.00    3.50
   3 -11  -1  287.17   18.40
   3 -11  -1  217.08   25.00
   4 -11  -1   -6.00    3.70
   4 -11  -1   -1.50    3.40
   5 -11  -1   49.90   13.80
   5 -11  -1   54.59    8.80
   6 -11  -1    6.90    7.70
   6 -11  -1    3.70    3.90
   7 -11  -1   25.80   10.70
   7 -11  -1   42.00    7.60
   8 -11  -1   11.80    9.50
   9 -11  -1    4.80    7.50
  10 -11  -1    1.40    8.30
  -9 -12  -1    0.40    6.10
  -8 -12  -1    1.40    6.60
  -7 -12  -1   12.40    7.60
  -6 -12  -1   42.80   11.20
  -5 -12  -1   -2.20    5.50
  -5 -12  -1    2.80    4.50
  -4 -12  -1    7.10    6.80
  -4 -12  -1    6.70    4.90
  -3 -12  -1   -4.10    4.00
  -3 -12  -1   -2.80    5.00
  -2 -12  -1   27.10    9.30
  -1 -12  -1   80.69   13.50
  -1 -12  -1   85.49   14.40
   0 -12  -1  116.29   17.10
   0 -12  -1  148.39   17.30
   1 -12  -1   66.39   11.20
   1 -12  -1   77.89   16.00
   2 -12  -1    1.10    5.00
   2 -12  -1    4.70    7.40
   3 -12  -1   59.79   14.40
   3 -12  -1  100.89   13.00
   4 -12  -1    4.00    6.50
   4 -12  -1    0.90    4.10
   5 -12  -1   -6.20    5.90
   5 -12  -1    9.90    4.50
   6 -12  -1    4.70    6.70
   6 -12  -1   -1.20    3.50
   7 -12  -1   13.00    9.90
   8 -12  -1    3.80    8.50
   9 -12  -1   10.40   10.20
  -8 -13  -1   15.90    8.90
  -7 -13  -1   13.00    8.20
  -6 -13  -1   -0.70    5.80
  -5 -13  -1    0.20    4.80
  -5 -13  -1   -1.60    4.60
  -4 -13  -1   52.89   11.00
  -4 -13  -1   18.60    8.80
  -3 -13  -1   38.10    9.90
  -3 -13  -1   47.70   11.40
  -2 -13  -1   12.20    6.90
  -2 -13  -1   -1.70    2.90
  -1 -13  -1   10.10    6.70
  -1 -13  -1    0.90    6.30
   0 -13  -1    7.90    6.10
   0 -13  -1    0.90    5.40
   1 -13  -1   -7.00    3.40
   1 -13  -1    4.40    6.30
   2 -13  -1   49.30    9.90
   2 -13  -1   62.29   13.50
   3 -13  -1    3.90    4.80
   3 -13  -1   -0.20    6.20
   4 -13  -1   11.80    9.10
   4 -13  -1   10.50    6.00
   5 -13  -1    3.60    5.30
   5 -13  -1    0.10    7.90
   6 -13  -1    1.60    5.50
   6 -13  -1   -1.30    7.10
   7 -13  -1   -0.70    8.30
   8 -13  -1    4.00    7.30
  -7 -14  -1   23.10    9.70
  -6 -14  -1    0.80    5.90
  -5 -14  -1    7.60    6.60
  -4 -14  -1   -1.30    6.10
  -4 -14  -1   -4.10    4.40
  -3 -14  -1   13.40    9.00
  -3 -14  -1    3.40    7.00
  -2 -14  -1    1.30    4.30
  -2 -14  -1   10.90    6.80
  -1 -14  -1    2.00    5.50
  -1 -14  -1    0.30    6.10
   0 -14  -1    9.40    6.70
   0 -14  -1    3.30    6.80
   1 -14  -1    6.10    6.30
   1 -14  -1   -4.40    5.30
   2 -14  -1    9.70    8.70
   2 -14  -1   20.30    8.50
   3 -14  -1    2.20    4.50
   3 -14  -1   12.90    9.50
   4 -14  -1   -2.40    7.20
   4 -14  -1    3.10    4.70
   5 -14  -1   -3.70    7.70
   5 -14  -1   -1.60    4.40
   6 -14  -1   -2.10    7.80
   7 -14  -1    2.10    8.30
  -5 -15  -1   -0.70    6.80
  -4 -15  -1    6.40    6.90
  -4 -15  -1   11.60    7.50
  -3 -15  -1   -0.20    5.50
  -3 -15  -1   -7.40    6.20
  -2 -15  -1   -0.90    4.80
  -2 -15  -1   -0.10    6.90
  -1 -15  -1   -5.60    5.50
  -1 -15  -1    1.30    7.00
   0 -15  -1   10.00    6.60
   0 -15  -1    1.40    6.80
   1 -15  -1   43.40   12.70
   1 -15  -1   39.00   10.70
   2 -15  -1   -6.10    6.70
   2 -15  -1    6.40    6.60
   3 -15  -1   17.80   10.50
   3 -15  -1   31.70   10.20
   4 -15  -1    6.50    7.40
   4 -15  -1   -6.10    6.10
   5 -15  -1   -2.70    8.90
  -3 -16  -1    7.90    9.30
  -3 -16  -1    2.90    6.70
  -2 -16  -1   -4.10    5.30
  -2 -16  -1    9.00    8.00
  -1 -16  -1    9.50    7.60
  -1 -16  -1    0.90    7.30
   0 -16  -1   -2.60    5.80
   0 -16  -1   13.80    9.00
   1 -16  -1   18.50   10.30
   1 -16  -1   17.20    8.80
   2 -16  -1   14.70    7.70
   2 -16  -1   -5.60    7.10
   3 -16  -1    2.60    8.80
   3 -16  -1   -3.70    6.50
   3 -16   2   11.30    9.60
   2 -16   2    4.50    6.00
   2 -16   2   -2.70    7.00
   1 -16   2    3.00    6.10
   1 -16   2   -6.60    6.70
   0 -16   2   12.30    7.20
   0 -16   2   -1.30    7.00
  -1 -16   2    4.40    7.40
  -1 -16   2   -1.90    6.80
  -2 -16   2   -2.70    5.10
  -2 -16   2   22.30    9.10
  -3 -16   2    3.20    6.80
  -3 -16   2    2.50    6.00
   5 -15   2    2.30    7.80
   4 -15   2    6.50    7.90
   3 -15   2   -3.30    6.60
   3 -15   2   -5.80    5.80
   2 -15   2   13.20    8.10
   2 -15   2   13.90    9.40
   1 -15   2   60.19   14.10
   1 -15   2   52.19   11.90
   0 -15   2   -0.80    6.50
   0 -15   2    7.40    6.10
  -1 -15   2    4.10    7.30
  -1 -15   2   12.90    7.40
  -2 -15   2   -1.60    4.20
  -2 -15   2    7.70    7.50
  -3 -15   2    5.70    6.10
  -3 -15   2    9.90    7.60
  -4 -15   2    0.40    5.90
  -4 -15   2   -0.30    6.30
  -5 -15   2   17.70    9.20
   7 -14   2   -1.50    8.30
   6 -14   2    1.80    5.90
   5 -14   2  -10.10    6.30
   4 -14   2   -2.40    4.70
   4 -14   2   -5.40    6.20
   3 -14   2   76.79   16.30
   3 -14   2   91.29   14.30
   2 -14   2   12.90    7.20
   2 -14   2    7.60    8.10
   1 -14   2   32.80    9.50
   1 -14   2   43.60   11.80
   0 -14   2    0.60    5.50
   0 -14   2   -0.40    6.40
  -1 -14   2    8.00    6.30
  -1 -14   2    3.20    5.60
  -2 -14   2    6.30    6.40
  -2 -14   2   -3.60    3.40
  -3 -14   2    6.60    7.10
  -3 -14   2   -3.20    5.10
  -4 -14   2    7.90    7.00
  -4 -14   2    4.20    5.40
  -5 -14   2   19.30    9.00
  -6 -14   2   -0.50    6.90
  -7 -14   2    3.40    7.20
   8 -13   2    3.50    8.30
   7 -13   2   19.70   10.20
   6 -13   2   18.50   10.30
   5 -13   2   -0.60    7.10
   4 -13   2   -2.30    5.60
   4 -13   2    8.10    5.40
   3 -13   2   23.30    7.50
   3 -13   2   32.30   10.80
   2 -13   2   13.30    6.10
   2 -13   2   22.80    9.40
   1 -13   2   29.00    8.60
   1 -13   2   43.20   11.20
   0 -13   2   45.80   11.10
   0 -13   2   82.69   13.20
  -1 -13   2   -3.10    4.40
  -1 -13   2    6.00    6.10
  -2 -13   2   -0.20    3.60
  -2 -13   2   14.60    7.00
  -3 -13   2   66.19   11.60
  -3 -13   2   59.39   12.70
  -4 -13   2    4.90    6.00
  -4 -13   2   13.10    6.00
  -5 -13   2   -9.00    3.60
  -5 -13   2   -0.40    4.00
  -6 -13   2   48.00   13.40
  -7 -13   2   -3.00    5.50
  -8 -13   2    4.20    7.50
   9 -12   2   -6.10    6.00
   8 -12   2   -1.40    7.20
   7 -12   2   17.60    9.80
   6 -12   2   -3.40    6.00
   5 -12   2    1.20    6.80
   5 -12   2   -1.20    3.80
   4 -12   2    7.30    4.70
   4 -12   2   -0.80    5.80
   3 -12   2   76.39   14.80
   3 -12   2   91.79   12.20
   2 -12   2   74.69   11.90
   2 -12   2   25.80   10.20
   1 -12   2    0.20    4.10
   1 -12   2   -2.60    5.50
   0 -12   2    5.00    5.20
   0 -12   2    3.50    5.60
  -1 -12   2   31.90    9.10
  -1 -12   2   49.50   10.80
  -2 -12   2    6.20    5.90
  -2 -12   2    4.40    3.80
  -3 -12   2   33.20    9.30
  -3 -12   2   14.20    6.90
  -4 -12   2    6.90    6.30
  -4 -12   2   13.30    6.00
  -5 -12   2   91.79   11.30
  -5 -12   2   69.69   13.70
  -6 -12   2   -1.90    5.70
  -7 -12   2   55.99   14.00
  -8 -12   2   -6.40    6.00
  -9 -12   2   -5.60    6.70
  10 -11   2   27.70   11.90
   9 -11   2    2.10    7.90
   8 -11   2   24.70   10.00
   7 -11   2   46.10   13.60
   6 -11   2    4.30    6.00
   5 -11   2   -1.40    3.20
   5 -11   2   -8.10    5.00
   4 -11   2    6.90    4.30
   4 -11   2   -0.30    5.40
   3 -11   2   -2.10    4.80
   3 -11   2   -0.60    3.50
   2 -11   2   38.20   10.70
   2 -11   2   39.00    8.10
   1 -11   2    4.00    5.80
   1 -11   2   -3.60    3.20
   0 -11   2   82.89   12.60
   0 -11   2   65.69   12.20
  -1 -11   2  205.68   20.40
  -1 -11   2  191.88   19.30
  -2 -11   2   -1.90    2.90
  -2 -11   2    4.80    5.70
  -3 -11   2   -1.50    4.50
  -3 -11   2    2.70    4.50
  -4 -11   2   15.00    6.70
  -4 -11   2   17.10    6.10
  -5 -11   2   -1.00    4.50
  -5 -11   2    3.60    3.80
  -6 -11   2   12.60    7.80
  -7 -11   2   -1.50    5.50
  -8 -11   2    6.20    7.00
  -9 -11   2   21.50    9.10
 -10 -11   2   42.70   12.40
  11 -10   2    4.70    6.90
  10 -10   2    3.50    8.40
   9 -10   2   -8.20    6.10
   8 -10   2   -1.90    4.90
   7 -10   2   46.50   13.10
   6 -10   2    0.20    5.50
   6 -10   2    2.10    3.10
   5 -10   2    5.50    6.80
   5 -10   2    6.30    3.80
   4 -10   2   42.50   11.40
   4 -10   2   62.89    8.80
   3 -10   2   45.00    7.70
   3 -10   2   41.60   10.70
   2 -10   2   86.29   10.90
   2 -10   2   82.89   14.00
   1 -10   2  104.49   14.40
   1 -10   2  106.79   12.60
   0 -10   2  375.96   25.00
   0 -10   2  379.86   22.70
  -1 -10   2    3.70    4.90
  -1 -10   2    1.20    4.60
  -2 -10   2   10.70    5.70
  -2 -10   2    7.60    4.30
  -3 -10   2   29.50    6.80
  -3 -10   2   35.80    9.00
  -4 -10   2   11.30    6.40
  -4 -10   2   -1.80    3.40
  -5 -10   2   15.40    7.00
  -5 -10   2   13.70    4.40
  -6 -10   2   18.70    4.40
  -6 -10   2   26.10    8.80
  -7 -10   2   47.00   12.20
  -8 -10   2   -6.70    5.30
  -9 -10   2   17.50    9.60
 -10 -10   2    6.80    6.50
  10  10  -2   -1.20    5.30
 -11 -10   2   -3.60    6.70
  11  10  -2   -2.50    5.30
  11  -9   2   10.00    7.10
  10  -9   2    4.30    7.90
   9  -9   2   -1.50    7.50
   8  -9   2    3.20    6.60
   7  -9   2   26.80    9.60
   6  -9   2   22.30    8.50
   6  -9   2   13.60    3.90
   5  -9   2   43.00   11.00
   4  -9   2   16.00    4.30
   4  -9   2    2.80    4.90
   3  -9   2    2.40    4.50
   3  -9   2    0.80    2.70
   2  -9   2   12.90    4.40
   2  -9   2    6.70    5.70
   1  -9   2   35.40    9.00
   1  -9   2   24.40    6.10
   0  -9   2   24.00    7.30
   0  -9   2   26.40    6.80
  -1  -9   2    4.50    4.10
  -1  -9   2    0.50    3.80
  -2  -9   2  146.79   16.20
  -2  -9   2  132.09   14.10
  -3  -9   2   21.10    6.60
  -3  -9   2    3.50    3.60
  -4  -9   2  148.49   11.50
  -4  -9   2  188.28   19.00
  -5  -9   2   18.00    6.80
  -5  -9   2   13.10    4.00
  -6  -9   2   20.00    3.90
  -6  -9   2   14.90    7.50
  -7  -9   2   13.10    7.30
  -8  -9   2   57.39   13.00
   8   9  -2   92.69   14.20
  -9  -9   2   10.40    8.20
   9   9  -2   10.70    6.60
 -10  -9   2   41.70   11.80
  10   9  -2   40.50   10.60
 -11  -9   2   -5.70    6.40
  11   9  -2   -1.60    5.40
  12  -8   2   14.10    8.50
  11  -8   2   11.40    7.30
  10  -8   2    6.10    7.40
   9  -8   2   16.40    8.10
   8  -8   2  122.79   17.80
   7  -8   2   14.60    3.40
   7  -8   2   18.50    7.80
   6  -8   2   -5.70    3.40
   6  -8   2   -3.20    1.60
   5  -8   2    5.40    5.20
   5  -8   2    2.40    2.70
   4  -8   2    5.40    2.70
   4  -8   2    5.90    4.70
   3  -8   2    8.20    5.20
   3  -8   2    1.60    2.50
   2  -8   2   -1.80    3.70
   2  -8   2    0.50    2.30
   1  -8   2    6.20    4.80
   1  -8   2   -2.50    2.30
   0  -8   2   89.79   12.10
   0  -8   2  105.89   11.70
  -1  -8   2   70.39    9.90
  -1  -8   2   78.79   10.80
  -2  -8   2  400.66   21.90
  -2  -8   2  385.36   22.80
  -3  -8   2   15.10    4.40
  -3  -8   2    5.10    4.10
  -4  -8   2    9.30    3.30
  -4  -8   2    9.40    5.40
  -5  -8   2   39.00    9.10
  -5  -8   2   35.60    5.10
  -6  -8   2  332.97   22.90
  -6  -8   2  290.67   13.30
   6   8  -2  294.27   19.90
  -7  -8   2   57.09   11.70
   7   8  -2   42.20    9.70
  -8  -8   2  304.47   28.50
   8   8  -2  289.97   21.40
  -9  -8   2   11.20    6.80
   9   8  -2   20.30    7.40
 -10  -8   2   11.30    7.40
  10   8  -2   -0.90    4.70
 -11  -8   2    9.10    8.40
  11   8  -2    4.40    6.10
 -12  -8   2    7.70    8.20
  12   8  -2   -0.50    5.60
  12  -7   2   -2.90    5.30
  11  -7   2   17.10    8.10
  10  -7   2   -2.30    5.10
   9  -7   2   65.49   12.90
   8  -7   2  143.49   18.90
   8  -7   2  144.99    7.90
   7  -7   2   57.69   11.40
   7  -7   2   65.29    5.60
   6  -7   2  129.19   16.50
   6  -7   2  137.49    7.70
   5  -7   2    7.00    2.50
   5  -7   2   11.70    5.90
   4  -7   2   15.80    3.70
   4  -7   2   24.10    7.20
   3  -7   2  102.89   13.20
   3  -7   2  101.99    7.70
   2  -7   2   70.09   10.80
   2  -7   2   85.09    8.50
   1  -7   2  722.53   35.20
   1  -7   2  721.63   30.70
   0  -7   2    0.70    2.90
   0  -7   2    5.40    2.90
  -1  -7   2  104.09   11.10
  -1  -7   2  132.19   12.70
  -2  -7   2  341.77   18.90
  -2  -7   2  362.86   20.70
  -3  -7   2   -0.10    2.30
  -3  -7   2   -0.60    2.80
  -4  -7   2   25.50    4.40
  -4  -7   2   13.10    5.40
  -5  -7   2   -1.70    1.80
  -5  -7   2   -0.20    3.60
   5   7  -2    2.50    3.90
  -6  -7   2  168.88   18.60
  -6  -7   2  139.49    6.70
   6   7  -2  145.79   15.60
  -7  -7   2   -2.30    4.60
   7   7  -2    6.90    5.10
  -8  -7   2   -0.90    5.60
   8   7  -2   16.00    6.60
  -9  -7   2   23.80    8.60
   9   7  -2   40.00   10.20
 -10  -7   2   -7.70    4.00
  10   7  -2   -1.80    5.20
 -11  -7   2   -4.30    5.70
  11   7  -2    8.40    7.60
 -12  -7   2   34.40   11.50
  12   7  -2    9.70    7.60
  13   7  -2   13.90   10.30
  13  -6   2    7.10    7.30
  13  -6   2    0.80    5.10
  12  -6   2    7.30    6.50
  12  -6   2    2.50    5.90
  11  -6   2   14.10    7.20
  10  -6   2    8.50    5.50
   9  -6   2  229.08   22.90
   8  -6   2   11.60    6.80
   8  -6   2   23.50    3.20
   7  -6   2   45.30    5.10
   7  -6   2   41.50    4.10
   7  -6   2   37.90    9.00
   6  -6   2    5.00    5.30
   6  -6   2   10.30    2.40
   6  -6   2   11.00    2.70
   5  -6   2   56.39    4.90
   5  -6   2   34.60    8.10
   5  -6   2   57.29    5.20
   4  -6   2   35.00    4.20
   4  -6   2   24.80    6.60
   3  -6   2  405.36   23.80
   3  -6   2  367.26   16.50
   2  -6   2   67.09    6.70
   2  -6   2   49.99    8.60
   1  -6   2  452.55   23.90
   1  -6   2  419.86   19.70
   0  -6   2   12.40    4.20
   0  -6   2   15.30    4.10
  -1  -6   2    0.40    2.60
  -1  -6   2   -0.40    2.20
  -2  -6   2    4.40    3.40
  -2  -6   2   17.10    4.00
  -3  -6   2   -3.80    1.90
  -3  -6   2    3.20    3.20
  -4  -6   2  108.19    7.10
  -4  -6   2  100.59   12.20
   4   6  -2  103.69   10.90
  -5  -6   2   76.79   11.70
  -5  -6   2   68.59    4.80
   5   6  -2   85.19   10.20
  -6  -6   2  216.98   19.60
   6   6  -2  157.58   15.40
  -7  -6   2   -3.00    3.90
   7   6  -2    5.30    5.50
  -8  -6   2  155.18   17.80
   8   6  -2  123.19   15.40
  -9  -6   2  126.19   17.40
   9   6  -2  111.29   15.40
 -10  -6   2   -4.30    5.30
  10   6  -2    8.70    6.50
 -11  -6   2   15.50    8.60
  11   6  -2   23.20    9.00
 -12  -6   2   -2.80    5.40
  12   6  -2    6.50    6.60
 -13  -6   2    6.60    7.80
  13   6  -2    0.70    6.90
  13  -5   2    5.60    7.30
  13  -5   2   -1.30    5.00
  12  -5   2    2.50    6.00
  12  -5   2   -2.70    5.00
  11  -5   2    2.90    5.20
  11  -5   2   12.10    7.20
  10  -5   2  132.89   16.20
   9  -5   2   26.70    3.80
   9  -5   2   24.30    8.00
   8  -5   2   64.89    4.80
   8  -5   2   65.09   11.30
   7  -5   2  265.27   13.20
   7  -5   2  280.07   11.60
   7  -5   2  290.97   20.40
   6  -5   2   57.69    4.00
   6  -5   2   64.49   10.50
   6  -5   2   71.49    5.60
   5  -5   2  155.08    7.70
   5  -5   2  163.48    7.40
   5  -5   2  153.18   15.80
   4  -5   2    8.40    1.80
   4  -5   2    7.20    1.90
   4  -5   2    1.30    3.10
   3  -5   2  672.03   25.50
   3  -5   2  707.53   33.10
  -3   5  -2  679.03   24.60
   2  -5   2   26.00    5.90
   2  -5   2   41.20    4.60
   1  -5   2  106.69   10.80
   1  -5   2  130.99    8.10
   0  -5   2   75.39    8.50
   0  -5   2   92.39    8.60
  -1  -5   2    6.30    3.00
  -1  -5   2   -0.30    1.30
  -2  -5   2  285.57   14.80
  -2  -5   2  330.57   17.30
  -3  -5   2  416.16   21.60
  -3  -5   2  419.16   18.00
  -4  -5   2   21.90    6.10
  -4  -5   2   19.60    2.70
   4   5  -2   20.20    5.00
  -5  -5   2   38.30    7.50
   5   5  -2   67.09    8.80
  -6  -5   2    6.70    4.70
   6   5  -2    8.90    5.00
  -7  -5   2    8.00    5.40
   7   5  -2   11.30    5.50
  -8  -5   2  179.18   19.70
   8   5  -2  178.88   17.90
  -9  -5   2   -1.30    4.70
   9   5  -2    6.60    5.80
 -10  -5   2  117.49   16.90
  10   5  -2  119.49   15.90
 -11  -5   2    2.00    5.20
  11   5  -2    5.80    6.80
 -12  -5   2    8.70    7.10
  12   5  -2   19.80    9.20
 -13  -5   2    3.80    6.60
  13   5  -2    2.40    6.70
  13  -4   2   -6.40    5.40
  13  -4   2    1.10    5.40
  12  -4   2    9.70    7.80
  12  -4   2   11.80    5.90
  11  -4   2   20.30    6.80
  11  -4   2    5.70    6.70
  10  -4   2  170.68   19.90
  10  -4   2  168.08   17.50
 -10   4  -2  180.08   11.50
   9  -4   2   57.79   10.00
  -9   4  -2   43.40    5.60
   8  -4   2   47.30    9.20
  -8   4  -2   43.40    5.20
   7  -4   2   33.70    7.50
  -7   4  -2   44.70    4.60
   6  -4   2    7.60    4.40
   6  -4   2   13.60    2.70
   6  -4   2   14.10    2.20
   5  -4   2   85.19   10.40
   5  -4   2   82.89    5.10
   5  -4   2   93.09    4.60
   4  -4   2    1.70    2.40
   4  -4   2    1.50    1.20
   4  -4   2    0.70    0.90
   3  -4   2  108.39    5.10
   3  -4   2   89.19   10.00
   3  -4   2  107.49    5.20
   2  -4   2  151.68    7.40
   2  -4   2  157.58   11.20
  -2   4  -2  153.88    6.90
   1  -4   2    2.00    2.40
   1  -4   2    7.90    2.20
  -1   4  -2    3.50    1.60
   0  -4   2  560.84   24.10
   0  -4   2  519.85   22.10
  -2  -4   2   14.10    2.70
  -2  -4   2   13.80    3.80
  -3  -4   2    2.10    2.20
   3   4  -2    2.40    1.70
   3   4  -2    4.50    2.70
  -4  -4   2   -0.70    2.60
  -4  -4   2    1.20    0.90
   4   4  -2    2.50    2.20
  -5  -4   2  164.88   15.20
   5   4  -2  185.58   12.70
  -6  -4   2   12.70    5.30
   6   4  -2    7.90    4.60
  -7  -4   2   96.39   13.10
   7   4  -2   83.69   11.50
  -8  -4   2   92.19   13.30
   8   4  -2  105.69   13.40
  -9  -4   2  180.18   19.00
   9   4  -2  206.68   20.30
 -10  -4   2  199.98   20.90
  10   4  -2  191.58   20.30
 -11  -4   2    1.30    5.30
  11   4  -2    8.00    6.00
 -12  -4   2    7.20    6.90
  12   4  -2    5.00    7.40
 -13  -4   2    9.90    7.40
  13   4  -2    6.20    7.50
  13  -3   2    0.30    5.60
  12  -3   2    2.90    6.20
  12  -3   2   18.50    6.30
  11  -3   2   -5.30    3.70
  11  -3   2    2.80    4.20
  10  -3   2   11.00    4.90
  10  -3   2   16.30    7.50
 -10   3  -2   10.70    3.90
   9  -3   2    7.20    4.80
   9  -3   2   -2.10    3.50
  -9   3  -2    3.60    2.90
   8  -3   2  198.08   15.30
  -8   3  -2  218.68   11.80
   7  -3   2   10.80    4.70
  -7   3  -2    8.10    2.60
   6  -3   2   94.29   10.70
  -6   3  -2   85.79    5.70
   5  -3   2  203.98    9.30
   5  -3   2  209.38   13.90
  -5   3  -2  208.88    9.10
   4  -3   2  962.80   33.90
   4  -3   2  975.90   33.40
   4  -3   2 1005.00   41.20
   3  -3   2   26.50    2.10
   3  -3   2   24.80    4.90
   3  -3   2   24.60    1.70
   2  -3   2   11.30    1.60
   2  -3   2   11.00    3.20
  -2   3  -2   12.60    1.40
   1  -3   2  147.79    9.40
   1  -3   2  146.89    7.10
  -1   3  -2  146.49    6.90
   0  -3   2 4000.50  133.79
   0  -3   2 3927.01  138.69
   0   3  -2 3894.41  133.49
  -1  -3   2 2069.59   74.09
   1   3  -2 2142.49   75.69
  -2  -3   2  340.47   16.60
  -2  -3   2  343.67   14.10
   2   3  -2  342.97   15.40
   2   3  -2  360.76   14.80
  -3  -3   2  382.26   18.10
  -3  -3   2  349.96   13.60
   3   3  -2  354.86   16.60
   3   3  -2  351.26   14.20
  -4  -3   2   67.69    8.50
   4   3  -2   65.19    7.70
  -5  -3   2   75.69    9.60
   5   3  -2   67.69    8.60
  -6  -3   2   14.50    5.30
   6   3  -2   11.00    4.50
  -7  -3   2   25.50    6.70
   7   3  -2   31.30    7.10
  -8  -3   2    0.90    3.80
   8   3  -2   -4.60    4.00
  -9  -3   2   47.70    9.70
   9   3  -2   49.30    9.80
 -10  -3   2   15.90    7.20
  10   3  -2   13.70    6.90
 -11  -3   2    7.10    6.20
  11   3  -2    7.60    6.90
 -12  -3   2   22.30    8.60
  12   3  -2   29.00   10.20
 -13  -3   2   -1.70    5.00
  13   3  -2   12.80    8.70
  14   3  -2   -7.10    7.40
  14  -2   2   -1.00    7.40
  13  -2   2   14.00    8.70
  12  -2   2    1.20    4.50
  12  -2   2    8.30    7.20
  11  -2   2   56.89    9.10
  11  -2   2   54.39   11.70
 -11   2  -2   55.09    8.60
  10  -2   2   31.50    6.60
  10  -2   2   20.90    7.80
 -10   2  -2   45.60    7.50
   9  -2   2   17.40    7.30
   9  -2   2   18.70    5.60
  -9   2  -2   17.20    4.60
   8  -2   2   10.20    4.10
   8  -2   2    5.10    4.20
  -8   2  -2    3.10    2.80
   7  -2   2    5.10    4.10
   7  -2   2    7.60    3.70
  -7   2  -2    3.60    2.70
   6  -2   2  273.37   15.70
  -6   2  -2  266.87   12.70
   5  -2   2  189.48    9.60
   5  -2   2  199.68   12.70
  -5   2  -2  201.78    9.50
   4  -2   2    3.40    1.30
   4  -2   2   10.60    3.30
  -4   2  -2    2.30    1.20
   3  -2   2  486.25   21.90
   3  -2   2  485.75   17.20
  -3   2  -2  492.45   17.10
   2  -2   2 3602.04  127.49
   1  -2   2 1967.80   70.79
   1  -2   2 1951.00   66.19
  -1   2  -2 1972.10   66.09
   0  -2   2   -0.30    1.20
   0  -2   2   -2.40    0.80
   0   2  -2   -0.50    1.10
   0   2  -2   -2.10    1.00
  -1  -2   2 3603.54  121.39
  -1  -2   2 3538.05  122.89
   1   2  -2 3623.04  123.79
   1   2  -2 3497.65  121.19
  -2  -2   2  268.07   10.60
  -2  -2   2  263.77   13.00
  -2  -2   2  270.67   12.20
   2   2  -2  258.77   12.00
   2   2  -2  272.47   10.70
  -3  -2   2 1169.78   44.40
  -3  -2   2 1184.58   41.20
   3   2  -2 1180.78   44.00
   3   2  -2 1145.59   40.90
  -4  -2   2  163.88   11.20
   4   2  -2  192.38   11.00
   4   2  -2  170.78    6.80
  -5  -2   2   44.60    7.20
   5   2  -2   39.70    2.90
  -6  -2   2  614.84   28.70
   6   2  -2  591.04   22.30
   6   2  -2  617.34   22.30
   6   2  -2  611.74   28.80
  -7  -2   2  185.98   14.20
   7   2  -2  217.78   15.50
   7   2  -2  195.18    8.90
   7   2  -2  195.38    8.60
  -8  -2   2   40.80    8.40
   8   2  -2   37.90    3.50
   8   2  -2   46.30    9.20
   8   2  -2   41.50    4.10
  -9  -2   2   -1.40    3.80
   9   2  -2   -3.20    1.40
   9   2  -2   -1.40    2.00
   9   2  -2    1.00    4.60
 -10  -2   2    5.60    5.40
  10   2  -2    8.00    6.50
 -11  -2   2    1.00    4.80
  11   2  -2   -2.70    4.90
 -12  -2   2    1.30    4.70
  12   2  -2   -5.30    6.00
 -13  -2   2    0.80    4.40
  13   2  -2   -5.70    6.10
 -14  -2   2    5.30    6.40
  14   2  -2   12.00    9.50
  14  -1   2    3.40    8.10
  13  -1   2   15.00    9.80
  12  -1   2    1.00    7.20
 -12   1  -2    3.50    4.40
  11  -1   2   24.20    5.60
  11  -1   2   17.30    8.30
 -11   1  -2   19.20    6.00
  10  -1   2   13.00    4.30
  10  -1   2    5.00    5.80
 -10   1  -2   11.10    4.80
   9  -1   2   -1.20    4.10
   9  -1   2    2.10    2.60
  -9   1  -2    0.40    2.60
   8  -1   2   81.19    9.00
   8  -1   2   75.29   10.90
  -8   1  -2   96.89   10.20
   7  -1   2   10.90    4.50
   7  -1   2   15.80    4.10
  -7   1  -2   18.00    4.10
   6  -1   2   42.60    7.30
   6  -1   2   36.10    5.40
  -6   1  -2   38.90    5.40
   5  -1   2    3.00    2.20
   5  -1   2    2.10    2.60
  -5   1  -2    5.10    2.20
   4  -1   2    1.00    1.20
   4  -1   2    0.70    1.50
  -4   1  -2   -0.10    1.10
   3  -1   2   48.10    5.10
   3  -1   2   48.30    3.30
  -3   1  -2   48.50    3.30
   2  -1   2   14.30    1.30
   2  -1   2    9.00    2.10
  -2   1  -2   13.40    1.40
  -2   1  -2   16.80    3.00
   1  -1   2   53.49    2.40
   1  -1   2   56.89    4.00
  -1   1  -2   50.09    2.40
  -1   1  -2   55.09    4.10
   0  -1   2 1025.70   36.90
   0  -1   2 1014.80   35.60
   0   1  -2 1041.20   36.90
   0   1  -2 1030.30   35.60
  -1  -1   2 1381.96   47.90
  -1  -1   2 1380.06   48.20
   1   1  -2 1361.86   48.20
   1   1  -2 1383.16   48.30
   1   1  -2 1360.26   47.90
  -2  -1   2 1512.15   51.19
  -2  -1   2 1425.46   50.99
  -2  -1   2 1430.76   50.49
   2   1  -2 1412.46   50.19
   2   1  -2 1382.16   50.89
  -3  -1   2    7.20    2.30
   3   1  -2    0.70    1.30
   3   1  -2    4.00    1.90
  -4  -1   2   76.69    7.60
   4   1  -2   90.59    8.30
   4   1  -2   73.99    5.00
  -5  -1   2    8.50    3.50
   5   1  -2    4.60    1.80
   5   1  -2    2.90    2.80
  -6  -1   2  140.99   12.80
   6   1  -2  147.39    8.60
   6   1  -2  141.39   13.00
  -7  -1   2   92.69   11.00
   7   1  -2  122.59   12.60
   7   1  -2  120.39    7.90
  -8  -1   2  153.38   14.80
   8   1  -2  146.89    9.30
   8   1  -2  157.88   15.80
  -9  -1   2   -1.50    4.00
   9   1  -2    5.10    4.80
   9   1  -2    2.90    2.40
 -10  -1   2   30.50    7.50
  10   1  -2   21.30    4.10
  10   1  -2   22.60    8.50
  11   1  -2   27.90    9.00
 -12  -1   2    8.40    5.80
  12   1  -2   11.00    7.80
 -13  -1   2   -1.80    4.50
  13   1  -2   -5.80    6.30
 -14  -1   2    1.10    5.30
  14   1  -2    4.70    8.40
  14   0   2   -2.80    6.50
  13   0   2   -0.80    6.20
  12   0   2   17.90    9.60
 -12   0  -2   30.20    7.80
  11   0   2   -3.20    2.80
  11   0   2   -7.30    4.00
 -11   0  -2   -0.90    3.40
  10   0   2   50.39    7.10
  10   0   2   51.39   11.60
 -10   0  -2   60.99    9.70
   9   0   2    1.50    4.50
   9   0   2   -1.80    2.40
  -9   0  -2    3.70    3.40
   8   0   2    4.50    5.00
   8   0   2    3.30    2.60
  -8   0  -2    6.10    3.70
   7   0   2    1.10    2.00
   7   0   2   -0.60    3.40
   6   0   2 1363.06   50.69
   6   0   2 1315.47   54.49
  -6   0  -2 1358.56   50.79
   5   0   2   -2.20    1.20
   5   0   2    0.40    2.00
  -5   0  -2   -0.10    1.60
   4   0   2   95.49    6.10
   4   0   2  109.89    9.70
  -4   0  -2   83.49    6.10
   3   0   2   -0.40    1.30
   3   0   2   -0.60    0.90
   3   0   2   -0.50    1.10
  -3   0  -2    0.90    1.20
  -3   0  -2   -0.30    1.00
   2   0   2 1156.48   39.90
   2   0   2 1164.58   42.30
   2   0   2 1162.98   41.50
  -2   0  -2 1145.89   40.00
  -2   0  -2 1124.89   41.50
   1   0   2    0.10    0.80
   1   0   2   -0.40    0.70
   1   0   2   -0.50    0.50
  -1   0  -2    2.20    1.00
  -1   0  -2   -0.60    0.70
  -1   0  -2    4.40    0.90
   0   0   2   33.70    2.50
   0   0   2   30.10    2.20
   0   0   2   33.80    1.70
   0   0  -2   31.40    1.60
   0   0  -2   30.10    2.20
  -1   0   2  -12.00    1.30
  -1   0   2  -10.60    1.30
   1   0  -2  -12.50    1.20
   1   0  -2   -9.20    1.40
  -2   0   2 3428.66  116.79
   2   0  -2 3369.96  118.49
   2   0  -2 3504.95  119.59
   2   0  -2 3439.06  116.89
  -3   0   2   -1.40    1.50
   3   0  -2   -1.20    1.40
  -4   0   2 1843.22   67.79
   4   0  -2 1933.81   69.19
  -5   0   2    0.00    1.80
   5   0  -2    0.40    1.70
  -6   0   2  538.65   24.60
   6   0  -2  532.05   25.20
   6   0  -2  505.35   23.50
  -7   0   2    2.50    2.50
   7   0  -2   -0.20    3.70
   7   0  -2   -0.40    2.20
   8   0  -2  127.59   10.00
   8   0  -2  146.69   15.40
  -9   0   2   -0.70    2.20
   9   0  -2   -0.30    4.00
   9   0  -2    1.00    2.40
 -10   0   2   -2.60    3.40
  10   0  -2   -1.40    2.60
  10   0  -2    3.70    4.90
 -11   0   2   -0.90    3.60
  11   0  -2    1.40    5.10
  11   0  -2   -1.70    3.10
 -12   0   2    6.30    5.20
  12   0  -2    8.30    7.60
 -13   0   2    3.00    5.20
  13   0  -2   -1.00    6.80
 -14   0   2    9.70    6.60
  14   0  -2   22.50   11.00
  14   1   2   -4.70    6.80
  13   1   2   19.60    9.50
 -13  -1  -2   23.80    7.70
  12   1   2    2.20    6.90
 -12  -1  -2    6.30    5.90
  11   1   2   19.30    8.00
 -11  -1  -2   15.10    6.60
  10   1   2   11.30    3.50
  10   1   2    6.40    5.50
 -10  -1  -2   12.50    5.50
   9   1   2   -0.70    4.10
   9   1   2    0.60    2.20
  -9  -1  -2    2.60    3.70
   8   1   2   72.89   11.50
   8   1   2   80.29    7.10
   7   1   2   15.50    5.50
   7   1   2   12.00    2.90
  -7  -1  -2    9.30    3.90
   6   1   2   23.00    5.90
   6   1   2   29.30    3.80
  -6  -1  -2   33.30    5.90
   5   1   2    1.40    1.40
   5   1   2    3.90    2.80
  -5  -1  -2    4.40    2.50
  -5  -1  -2    4.50    2.20
   4   1   2   -0.20    1.00
   4   1   2   -1.50    1.40
  -4  -1  -2    0.20    1.00
  -4  -1  -2    0.30    1.10
   3   1   2   44.20    3.40
   3   1   2   53.89    6.10
  -3  -1  -2   49.10    3.50
   2   1   2   12.20    2.00
   2   1   2   12.10    2.70
   2   1   2   12.20    2.30
  -2  -1  -2   13.90    1.90
  -2  -1  -2    7.10    1.90
   1   1   2   51.89    3.40
   1   1   2   58.69    3.90
   1   1   2   58.59    4.00
  -1  -1  -2   54.89    3.60
  -1  -1  -2   53.99    3.70
  -1  -1  -2   55.89    3.80
   0   1   2 1077.09   36.80
   0   1   2 1057.39   38.90
   0  -1  -2 1090.09   38.80
   0  -1  -2 1040.70   37.30
   0  -1  -2 1059.19   36.80
  -1   1   2 1468.75   50.79
   1  -1  -2 1455.65   50.89
  -2   1   2 1499.75   52.19
   2  -1  -2 1464.45   52.09
  -3   1   2    5.90    2.10
  -4   1   2   32.70    4.60
  -5   1   2   -0.30    1.00
  -6   1   2   87.09    9.50
   6  -1  -2  160.98   11.10
   6  -1  -2  133.29   12.30
  -7   1   2  114.99   11.50
   7  -1  -2  166.58   15.10
   7  -1  -2  138.09   12.70
  -8   1   2  153.68   14.10
   8  -1  -2  164.08   14.70
   8  -1  -2  190.48   17.40
  -9   1   2   10.20    4.70
   9  -1  -2   12.80    5.60
   9  -1  -2   15.80    4.90
 -10   1   2   19.60    6.30
  10  -1  -2   23.10    8.00
  10  -1  -2   28.80    6.30
 -11   1   2    4.90    4.90
  11  -1  -2   29.00    6.60
  11  -1  -2   20.20    8.20
 -12   1   2    7.40    5.30
  12  -1  -2   14.20    7.90
 -13   1   2    1.80    5.00
  13  -1  -2  -10.60    5.10
  14  -1  -2   -1.40    7.10
  14   2   2    1.30    8.30
  13   2   2   -4.40    6.60
 -13  -2  -2    8.20    6.70
  12   2   2    4.50    6.70
 -12  -2  -2   11.60    6.30
  11   2   2   38.60   10.90
 -11  -2  -2   65.99   11.50
  10   2   2   32.60    4.60
  10   2   2    9.90    6.60
 -10  -2  -2   36.00    8.60
   9   2   2   16.90    7.30
   9   2   2   17.70    3.50
  -9  -2  -2   18.60    6.20
   8   2   2    2.60    1.90
   8   2   2   -1.00    4.00
  -8  -2  -2   -2.30    1.80
   7   2   2    5.60    4.60
   7   2   2    5.20    2.10
  -7  -2  -2   -1.10    2.20
  -7  -2  -2    4.90    2.60
   6   2   2  287.77   17.90
   6   2   2  263.77   11.80
  -6  -2  -2  259.87   12.60
  -6  -2  -2  252.77   15.40
   5   2   2  197.98    9.20
   5   2   2  187.48   13.20
  -5  -2  -2  187.98    9.30
  -5  -2  -2  192.08   12.40
   4   2   2    2.00    2.50
   4   2   2    4.10    1.50
  -4  -2  -2    2.90    1.30
  -4  -2  -2    2.10    2.20
   3   2   2  450.85   18.20
   3   2   2  477.25   20.90
  -3  -2  -2  455.65   17.50
  -3  -2  -2  470.75   20.30
   2   2   2 3270.47  115.49
   2   2   2 3259.47  114.79
  -2  -2  -2 3230.18  114.29
  -2  -2  -2 3399.16  113.09
   1   2   2 1861.81   66.79
  -1  -2  -2 1920.01   65.49
  -1  -2  -2 1905.81   67.09
  -1  -2  -2 1841.42   67.09
   0   2   2   -2.60    0.70
   0  -2  -2   -1.30    1.00
  -1   2   2 3943.51  130.39
   1  -2  -2 3812.22  130.29
  -2   2   2  292.87   12.40
   2  -2  -2  283.67   12.70
  -3   2   2    1.60    0.80
  -4   2   2  176.28    9.90
  -5   2   2   45.40    6.10
  -6   2   2  617.14   27.30
   6  -2  -2  649.93   30.40
  -7   2   2  209.28   13.00
   7  -2  -2  176.08   16.40
  -8   2   2   45.00    7.60
   8  -2  -2   46.20    8.60
   8  -2  -2   42.40    8.00
  -9   2   2   -2.00    2.50
   9  -2  -2    4.00    4.00
   9  -2  -2   -3.90    2.80
 -10   2   2    1.20    3.40
  10  -2  -2   -9.80    3.20
  10  -2  -2   -1.40    3.50
 -11   2   2    2.20    4.20
  11  -2  -2    4.00    5.00
  11  -2  -2    1.80    5.70
 -12   2   2    0.20    3.80
  12  -2  -2  -10.00    5.00
  12  -2  -2    3.40    4.30
 -13   2   2    1.10    4.70
  13  -2  -2    9.90    8.30
  14  -2  -2   10.40    9.30
  13   3   2   -0.80    6.90
 -13  -3  -2    6.00    6.50
  12   3   2    9.90    7.80
 -12  -3  -2    3.40    5.60
  11   3   2   -7.30    3.80
 -11  -3  -2   -0.70    2.90
  10   3   2   10.20    6.80
 -10  -3  -2   10.90    5.70
   9   3   2   -0.10    5.20
  -9  -3  -2    6.70    5.00
   8   3   2  175.98   17.90
   8   3   2  181.88    8.80
  -8  -3  -2  202.78   18.40
   7   3   2    5.70    2.00
   7   3   2    6.30    4.60
  -7  -3  -2    5.10    3.80
  -7  -3  -2    4.30    1.90
   6   3   2   80.79   10.30
   6   3   2   72.79    5.10
  -6  -3  -2   71.19    5.00
  -6  -3  -2   83.99   10.40
   5   3   2  183.68    9.10
   5   3   2  178.78   13.00
  -5  -3  -2  196.08    8.50
  -5  -3  -2  177.58   12.80
   4   3   2  961.50   39.00
   4   3   2  880.31   34.80
  -4  -3  -2  957.70   34.00
  -4  -3  -2  981.30   38.70
   3   3   2   18.30    4.30
  -3  -3  -2   24.70    4.50
  -3  -3  -2   22.30    3.00
   2   3   2   17.60    3.70
  -2  -3  -2   15.20    3.30
  -2  -3  -2   12.10    2.80
  -1  -3  -2  162.38    9.00
   0  -3  -2 3718.93  126.49
   1  -3  -2 2255.27   77.49
   2  -3  -2  366.36   14.90
   3  -3  -2  364.76   15.00
  -4   3   2   74.19    6.80
  -5   3   2   67.29    7.10
   5  -3  -2   62.69    9.40
  -6   3   2   10.60    3.50
   6  -3  -2   11.20    4.80
  -7   3   2   27.50    5.50
   7  -3  -2   13.80    5.90
  -8   3   2   -3.90    2.30
   8  -3  -2   -5.50    3.30
  -9   3   2   68.69    9.40
   9  -3  -2   73.09   11.90
   9  -3  -2   74.99   11.40
 -10   3   2   25.60    6.30
  10  -3  -2   20.90    7.00
  10  -3  -2   18.80    7.40
 -11   3   2   10.70    5.00
  11  -3  -2    8.20    6.50
  11  -3  -2   10.40    5.50
 -12   3   2   38.10    8.10
  12  -3  -2   35.70    8.80
  12  -3  -2   12.60    6.70
  13  -3  -2   -9.90    4.50
  14  -3  -2    0.00    7.00
  13   4   2    2.70    7.00
 -13  -4  -2   -0.40    4.90
  12   4   2    0.00    5.50
 -12  -4  -2   14.00    7.60
  11   4   2    8.10    7.80
 -11  -4  -2    3.80    6.20
  10   4   2  178.58   20.60
 -10  -4  -2  181.48   19.70
   9   4   2   34.20    9.30
  -9  -4  -2   28.90    8.10
   8   4   2   33.10    8.30
  -8  -4  -2   36.90    8.30
   7   4   2   37.60    8.00
  -7  -4  -2   42.40    8.60
   6   4   2   13.50    5.00
  -6  -4  -2   15.00    5.00
  -6  -4  -2   12.00    1.90
   5   4   2  100.79   11.40
  -5  -4  -2  106.89    5.50
  -5  -4  -2  107.99   11.90
   4   4   2    2.70    3.10
  -4  -4  -2    1.60    2.50
  -4  -4  -2    0.10    1.40
   3   4   2  100.19    9.60
  -3  -4  -2  102.69   10.30
  -3  -4  -2   92.19    6.60
   2   4   2  141.89    9.30
  -2  -4  -2  140.39    9.80
  -1  -4  -2    4.40    2.10
   0  -4  -2  527.35   22.00
   1  -4  -2 1891.91   66.69
   2  -4  -2   12.60    2.70
   3  -4  -2    5.40    1.90
   4  -4  -2    1.30    1.60
  -5   4   2  180.68   10.30
   5  -4  -2  157.68   15.90
  -6   4   2   14.40    3.80
   6  -4  -2   15.80    5.90
  -7   4   2   85.29    9.00
   7  -4  -2   98.59   13.30
  -8   4   2  122.79   11.30
   8  -4  -2   85.49   13.30
  -9   4   2  156.88   11.90
   9  -4  -2  180.98   19.60
 -10   4   2  195.58   13.80
  10  -4  -2  206.28   21.10
  10  -4  -2  193.98   20.20
 -11   4   2    4.10    3.90
  11  -4  -2    6.80    5.80
  11  -4  -2    5.10    5.90
 -12   4   2    2.40    4.30
  12  -4  -2    0.20    5.10
  12  -4  -2    2.10    6.10
  13  -4  -2    1.40    5.90
  13  -4  -2    3.90    6.60
  13   5   2   -8.10    5.20
 -13  -5  -2   -6.30    5.60
  12   5   2   -1.90    5.80
 -12  -5  -2   -4.00    5.90
  11   5   2   18.70    9.00
 -11  -5  -2    9.90    7.20
  10   5   2  141.59   18.30
 -10  -5  -2  166.38   20.10
   9   5   2   28.40    8.90
  -9  -5  -2   23.80    8.30
   8   5   2   62.79   11.40
  -8  -5  -2   59.09   11.10
   7   5   2  236.78   17.50
  -7  -5  -2  229.68   17.30
   6   5   2   52.19    9.10
  -6  -5  -2   73.99   10.90
  -6  -5  -2   55.29    3.70
   5   5   2  146.39   14.30
  -5  -5  -2  121.39   13.20
  -5  -5  -2  138.99    7.50
   4   5   2    6.40    4.00
  -4  -5  -2    6.60    3.80
   3   5   2  628.94   28.30
  -3  -5  -2  627.24   28.80
  -2  -5  -2   38.90    6.60
  -1  -5  -2  130.59    9.30
   0  -5  -2  108.89    9.40
   1  -5  -2    7.10    2.40
   2  -5  -2  305.77   14.40
   3  -5  -2  403.66   17.40
   4  -5  -2   15.10    5.30
   4  -5  -2   20.20    3.50
   5  -5  -2   53.49   10.10
   5  -5  -2   58.09    6.00
   6  -5  -2   12.80    3.20
   6  -5  -2    4.70    4.50
   7  -5  -2    6.20    2.90
   7  -5  -2    3.50    5.00
  -8   5   2  194.48   12.50
   8  -5  -2  208.08   22.00
  -9   5   2    0.60    2.70
   9  -5  -2   -0.90    4.80
 -10   5   2  149.09   13.10
  10  -5  -2  134.99   17.80
 -11   5   2    5.30    4.10
  11  -5  -2    3.30    5.30
  11  -5  -2    4.60    5.60
  12  -5  -2    9.60    6.00
  12  -5  -2    5.50    5.80
  13  -5  -2    4.50    7.00
  13  -5  -2   16.70    9.00
  13   6   2   -4.20    5.60
 -13  -6  -2    4.40    7.20
  12   6   2   10.60    7.60
 -12  -6  -2   10.60    7.40
  11   6   2    1.40    5.50
 -11  -6  -2    7.60    6.10
  10   6   2    1.30    5.60
 -10  -6  -2   -4.80    4.80
   9   6   2  226.18   22.80
  -9  -6  -2  235.08   23.60
   8   6   2   11.40    7.70
  -8  -6  -2   17.70    7.60
   7   6   2   32.60    8.90
  -7  -6  -2   25.10    7.70
   6   6   2    5.60    4.90
  -6  -6  -2   12.30    2.30
  -6  -6  -2   15.50    6.50
   5   6   2   37.80    7.50
  -5  -6  -2   24.60    6.80
   4   6   2   32.60    6.70
  -4  -6  -2   19.90    6.50
  -3  -6  -2  344.97   19.60
  -2  -6  -2   54.09    7.90
  -1  -6  -2  432.86   21.40
   0  -6  -2    7.70    3.10
   1  -6  -2    0.60    2.10
   2  -6  -2   14.60    3.70
   3  -6  -2    1.20    1.80
   4  -6  -2  124.39   15.40
   4  -6  -2  112.49    7.90
   5  -6  -2   87.59    7.80
   5  -6  -2   67.19   11.50
   6  -6  -2  136.89   17.30
   6  -6  -2  189.48   10.70
   7  -6  -2    0.20    4.10
   7  -6  -2    0.00    2.40
   8  -6  -2  145.79   10.00
   8  -6  -2  139.89   18.60
   9  -6  -2  163.58   21.10
   9  -6  -2  142.09   10.00
  10  -6  -2    1.50    5.40
  10  -6  -2    0.20    3.20
  11  -6  -2   15.50    7.90
  12  -6  -2   -4.60    4.60
  12  -6  -2    7.60    5.60
  13  -6  -2   11.70    8.30
  13  -6  -2   -1.30    6.30
  12   7   2   -2.80    6.30
 -12  -7  -2   -1.80    6.50
  11   7   2   14.10    8.00
 -11  -7  -2   17.90    9.30
  10   7   2    3.30    5.40
 -10  -7  -2   -3.40    5.50
   9   7   2   50.89   11.10
  -9  -7  -2   57.49   12.10
   8   7   2  112.49   15.70
  -8  -7  -2  156.28   18.70
   7   7   2   36.00    9.00
  -7  -7  -2   26.90    8.10
   6   7   2  108.69   13.90
  -6  -7  -2  112.59   14.90
  -6  -7  -2  116.99    8.00
   5   7   2    1.90    3.60
  -5  -7  -2    1.40    3.40
   4   7   2   16.20    4.80
  -4  -7  -2   18.90    6.40
  -3  -7  -2  101.59   12.60
  -2  -7  -2   82.49   10.60
  -1  -7  -2  688.03   31.30
   0  -7  -2   -1.20    1.80
   1  -7  -2  138.19   10.20
   2  -7  -2  359.36   18.20
   3  -7  -2    2.40    2.60
   3  -7  -2    2.70    3.90
   4  -7  -2   21.60    4.30
   4  -7  -2   32.40    8.40
   5  -7  -2    6.10    2.90
   5  -7  -2   -1.90    3.90
   6  -7  -2  130.99    9.40
   6  -7  -2  161.48   19.30
   7  -7  -2    3.90    6.40
   7  -7  -2    4.40    3.10
   8  -7  -2   10.70    3.70
   8  -7  -2   14.30    8.00
   9  -7  -2   36.20    6.00
   9  -7  -2   26.80    9.50
  10  -7  -2    3.60    3.40
  10  -7  -2    1.80    6.20
  11  -7  -2    5.50    7.00
  12  -7  -2    5.60    7.20
  13  -7  -2   29.00   10.80
  12   8   2   13.70    7.60
 -12  -8  -2   12.50    8.00
  11   8   2    7.80    7.50
 -11  -8  -2   -5.20    5.80
  10   8   2    9.40    7.90
 -10  -8  -2   12.00    7.90
   9   8   2   16.90    7.50
  -9  -8  -2   28.90    9.00
   8   8   2  151.78   18.90
  -8  -8  -2  156.38   19.70
   7   8   2   12.90    6.10
  -7  -8  -2   19.80    7.60
   6   8   2   -3.40    3.60
  -6  -8  -2   -5.80    3.60
  -6  -8  -2    2.20    2.40
  -5  -8  -2    3.70    2.90
  -5  -8  -2    6.20    5.20
  -4  -8  -2    1.70    2.80
  -4  -8  -2    1.40    4.10
  -3  -8  -2    2.00    3.70
  -2  -8  -2    0.40    3.40
  -1  -8  -2    4.70    3.70
   0  -8  -2   82.69   10.10
   1  -8  -2   78.59    9.60
   1  -8  -2   93.79   13.30
   2  -8  -2  392.26   20.10
   2  -8  -2  383.96   25.40
   3  -8  -2    4.10    4.30
   3  -8  -2    6.10    3.40
   4  -8  -2    7.00    5.30
   4  -8  -2   12.10    3.80
   5  -8  -2   33.00    6.00
   5  -8  -2   20.20    8.20
   6  -8  -2  360.86   32.50
   6  -8  -2  333.17   17.40
   7  -8  -2   57.09    7.30
   7  -8  -2   49.90   12.50
   8  -8  -2  326.57   17.10
   8  -8  -2  330.17   32.20
   9  -8  -2   14.30    4.60
   9  -8  -2    8.40    7.70
  10  -8  -2   -1.10    6.20
  11  -8  -2   -7.00    5.10
  12  -8  -2   -1.50    6.10
  11   9   2   11.80    8.10
 -11  -9  -2   14.10    9.50
  10   9   2    0.60    6.20
 -10  -9  -2   -0.30    6.40
   9   9   2    1.40    6.20
  -9  -9  -2   14.30    7.80
   8   9   2    5.30    5.20
  -8  -9  -2    4.40    5.30
   7   9   2   18.70    7.50
  -7  -9  -2   35.80    9.90
  -6  -9  -2    6.00    6.90
  -6  -9  -2   18.00    4.60
  -5  -9  -2   46.00    7.70
  -5  -9  -2   52.49   11.10
  -4  -9  -2    7.00    5.50
  -4  -9  -2    1.60    3.60
  -3  -9  -2    2.30    3.80
  -3  -9  -2    0.90    3.60
  -2  -9  -2    6.80    4.50
  -2  -9  -2   15.20    5.70
  -1  -9  -2   32.10    7.90
  -1  -9  -2   25.00    6.80
   0  -9  -2   37.80    7.40
   0  -9  -2    7.90    5.30
   1  -9  -2    1.10    3.20
   1  -9  -2   -1.60    4.00
   2  -9  -2  131.99   12.70
   2  -9  -2  139.69   18.40
   3  -9  -2    3.50    3.30
   3  -9  -2    8.70    6.20
   4  -9  -2  152.38   13.80
   4  -9  -2  173.48   21.60
   5  -9  -2    9.60    6.20
   5  -9  -2    9.90    4.40
   6  -9  -2   20.80    8.60
   6  -9  -2   37.60    6.70
   7  -9  -2    7.80    4.00
   7  -9  -2   13.70    8.30
   8  -9  -2   66.29   14.90
   8  -9  -2  118.99   11.20
   9  -9  -2   15.00    8.70
   9  -9  -2   33.20    6.30
  10  -9  -2   30.50   11.70
  11  -9  -2   -8.20    5.60
  11  10   2   -1.40    6.20
 -11 -10  -2   -1.30    7.50
  10  10   2   15.00    8.30
 -10 -10  -2    2.60    6.70
   9  10   2   -4.30    5.40
  -9 -10  -2   -8.90    4.90
   8  10   2    2.00    5.00
  -8 -10  -2    0.30    5.10
  -7 -10  -2   47.30   11.30
  -6 -10  -2    5.10    5.60
  -6 -10  -2    9.20    4.00
  -5 -10  -2    0.70    4.80
  -5 -10  -2    4.50    3.50
  -4 -10  -2   49.90    9.00
  -4 -10  -2   48.40   10.90
  -3 -10  -2   48.50   10.30
  -3 -10  -2   45.60    9.30
  -2 -10  -2   30.70    7.80
  -2 -10  -2   84.09   12.80
  -1 -10  -2   97.29   13.20
  -1 -10  -2  108.09   14.80
   0 -10  -2  368.16   25.90
   0 -10  -2  392.86   23.50
   1 -10  -2   -3.60    3.00
   1 -10  -2   -2.90    4.60
   2 -10  -2    9.10    6.20
   2 -10  -2   19.80    6.00
   3 -10  -2   31.90   10.40
   3 -10  -2   30.30    6.80
   4 -10  -2    6.50    6.50
   4 -10  -2   13.30    4.80
   5 -10  -2   14.80    5.60
   5 -10  -2   16.40    8.40
   6 -10  -2    2.60    7.10
   6 -10  -2   14.60    5.50
   7 -10  -2   30.90    7.00
   7 -10  -2   34.70   12.20
   8 -10  -2    5.30    4.50
   8 -10  -2   -3.50    4.90
   9 -10  -2   13.60   10.20
  10 -10  -2   -3.50    7.30
  11 -10  -2   -0.70    7.70
  10  11   2    6.80    6.30
 -10 -11  -2   36.80   12.20
  -9 -11  -2    2.10    6.20
  -8 -11  -2    4.10    6.60
  -7 -11  -2    5.70    6.50
  -6 -11  -2    8.00    6.60
  -5 -11  -2   -5.40    3.90
  -5 -11  -2    2.50    3.70
  -4 -11  -2    1.50    5.50
  -4 -11  -2   -0.80    3.50
  -3 -11  -2   -2.50    4.10
  -3 -11  -2   -2.00    4.10
  -2 -11  -2   35.50    9.30
  -1 -11  -2   -1.70    4.00
  -1 -11  -2    1.10    5.10
   0 -11  -2  104.59   16.30
   0 -11  -2   89.99   13.00
   1 -11  -2  201.38   19.00
   1 -11  -2  204.28   22.90
   2 -11  -2   -3.20    6.10
   2 -11  -2   -4.00    3.00
   3 -11  -2    8.70    5.10
   3 -11  -2    2.60    7.60
   4 -11  -2   15.90    8.60
   4 -11  -2   31.60    6.90
   5 -11  -2    5.50    4.10
   5 -11  -2   -1.90    6.00
   6 -11  -2   14.30    9.40
   6 -11  -2   29.90    7.00
   7 -11  -2    6.50    4.50
   7 -11  -2    5.00    7.90
   8 -11  -2    9.50    8.50
   9 -11  -2   37.20   13.50
  10 -11  -2   13.70    9.70
  -9 -12  -2   -8.70    5.40
  -8 -12  -2    8.80    6.70
  -7 -12  -2   38.30   12.10
  -6 -12  -2   -1.80    4.90
  -5 -12  -2   -1.60    3.60
  -5 -12  -2   -6.00    5.20
  -4 -12  -2    0.50    4.20
  -4 -12  -2    4.60    6.70
  -3 -12  -2   73.19   12.70
  -3 -12  -2   85.09   14.60
  -2 -12  -2   61.99   12.10
  -1 -12  -2   -3.70    4.70
  -1 -12  -2   -3.60    4.40
   0 -12  -2   -1.40    5.50
   0 -12  -2    3.20    4.40
   1 -12  -2   57.49   11.10
   1 -12  -2   44.10   12.60
   2 -12  -2    2.90    5.10
   2 -12  -2    8.90    8.10
   3 -12  -2   43.40   12.40
   3 -12  -2   39.60    8.80
   4 -12  -2   11.30    5.70
   4 -12  -2    5.90    8.10
   5 -12  -2   66.19   16.20
   5 -12  -2   67.39   10.70
   6 -12  -2   -3.30    3.00
   6 -12  -2   -2.90    6.00
   7 -12  -2   47.00    8.60
   7 -12  -2   39.00   12.90
   8 -12  -2   11.90    9.90
   9 -12  -2   -4.10    8.40
  -8 -13  -2    6.90    8.30
  -7 -13  -2   21.70    9.50
  -6 -13  -2    9.20    7.00
  -5 -13  -2    4.50    5.60
  -5 -13  -2   13.30    8.40
  -4 -13  -2    1.30    4.90
  -4 -13  -2    6.00    5.50
  -3 -13  -2   34.10   10.90
  -3 -13  -2   36.90    9.50
  -2 -13  -2    0.10    4.10
  -2 -13  -2   12.70    8.20
  -1 -13  -2   23.20    9.40
  -1 -13  -2   30.40    9.30
   0 -13  -2   68.49   12.40
   0 -13  -2   71.89   14.40
   1 -13  -2    0.40    4.20
   1 -13  -2    1.40    6.20
   2 -13  -2   21.10    9.80
   2 -13  -2   16.50    7.00
   3 -13  -2   49.10   13.30
   3 -13  -2   62.09   11.00
   4 -13  -2    5.50    5.60
   4 -13  -2   -9.40    6.10
   5 -13  -2    4.90    4.60
   5 -13  -2    2.80    6.60
   6 -13  -2   27.90   12.20
   6 -13  -2   35.50    8.40
   7 -13  -2   15.40   10.70
   8 -13  -2    3.30    7.90
  -7 -14  -2   -8.30    5.30
  -6 -14  -2    4.90    6.80
  -5 -14  -2   -7.70    6.10
  -4 -14  -2    3.00    5.90
  -4 -14  -2    1.10    6.40
  -3 -14  -2   57.29   12.60
  -3 -14  -2   49.70   13.10
  -2 -14  -2   27.50    9.60
  -2 -14  -2    0.70    4.40
  -1 -14  -2   30.40   10.20
  -1 -14  -2   43.60   11.20
   0 -14  -2   -2.10    5.40
   0 -14  -2    2.50    6.20
   1 -14  -2    2.40    5.90
   1 -14  -2    0.10    5.90
   2 -14  -2    4.00    5.60
   2 -14  -2   -4.90    5.70
   3 -14  -2   -4.10    4.50
   3 -14  -2   -3.70    5.30
   4 -14  -2    4.40    6.00
   4 -14  -2    3.90    7.80
   5 -14  -2    0.50    8.20
   5 -14  -2    5.10    5.60
   6 -14  -2    2.10    7.90
   7 -14  -2   10.70    9.40
  -5 -15  -2    2.20    6.90
  -4 -15  -2   -8.90    5.90
  -4 -15  -2    3.00    6.50
  -3 -15  -2    0.00    5.90
  -3 -15  -2   -3.90    5.60
  -2 -15  -2    4.50    6.00
  -2 -15  -2   12.10    8.20
  -1 -15  -2   37.90   11.60
  -1 -15  -2   51.59   12.70
   0 -15  -2    3.70    6.10
   0 -15  -2    4.30    7.00
   1 -15  -2    9.40    8.30
   1 -15  -2    4.00    7.00
   2 -15  -2    0.90    8.20
   2 -15  -2   -3.10    5.90
   3 -15  -2    2.80    7.80
   3 -15  -2   23.50    8.10
   4 -15  -2   11.60    6.80
   4 -15  -2   14.20    9.70
   5 -15  -2    1.70    8.90
   5 -15  -2   17.80    8.00
  -3 -16  -2   16.80    8.90
  -3 -16  -2    9.50    8.50
  -2 -16  -2   -1.80    6.10
  -2 -16  -2    7.50    8.10
  -1 -16  -2   -7.10    7.40
  -1 -16  -2    3.00    7.10
   0 -16  -2    0.30    7.40
   0 -16  -2    5.80    7.40
   1 -16  -2   -0.60    7.40
   1 -16  -2    3.60    6.30
   2 -16  -2   20.20    9.00
   2 -16  -2    7.90    9.30
   3 -16  -2   -2.90    6.60
   3 -16  -2    9.90   10.30
   2 -16   3    2.40    8.20
   2 -16   3   17.90    7.80
   1 -16   3   -5.00    6.60
   1 -16   3   -3.30    5.20
   0 -16   3    4.70    6.60
   0 -16   3   -5.00    6.20
  -1 -16   3    0.10    6.10
  -1 -16   3    4.90    6.80
  -2 -16   3    8.30    7.80
  -2 -16   3   -1.00    5.00
  -3 -16   3   15.80    9.90
  -3 -16   3    1.40    6.20
   5 -15   3  -10.50    4.70
   4 -15   3   -1.70    6.50
   3 -15   3    3.40    8.10
   3 -15   3    8.60    6.40
   2 -15   3   -1.50    5.30
   2 -15   3   -2.50    7.40
   1 -15   3   -0.60    5.70
   1 -15   3    2.90    7.30
   0 -15   3   13.90    7.30
   0 -15   3    1.30    7.10
  -1 -15   3   15.40    7.30
  -1 -15   3   14.10    8.40
  -2 -15   3    0.00    4.10
  -2 -15   3    3.30    6.10
  -3 -15   3   -1.80    5.10
  -3 -15   3   -1.60    5.80
  -4 -15   3   -0.20    5.60
  -4 -15   3    2.30    7.20
  -5 -15   3   20.90    9.50
   7 -14   3   13.50   10.70
   6 -14   3   26.10   12.10
   5 -14   3   23.10   11.50
   4 -14   3    3.30    8.50
   3 -14   3   15.10    6.70
   3 -14   3   -5.60    6.60
   2 -14   3   57.79   11.50
   2 -14   3   53.49   14.20
   1 -14   3    5.20    5.80
   1 -14   3   -3.00    6.20
   0 -14   3    9.60    6.70
   0 -14   3   11.30    7.60
  -1 -14   3   12.00    7.70
  -1 -14   3    7.30    6.40
  -2 -14   3   -0.80    3.60
  -2 -14   3    3.30    5.50
  -3 -14   3   28.00   10.10
  -3 -14   3   39.50    9.70
  -4 -14   3    5.70    5.80
  -4 -14   3    1.10    6.40
  -5 -14   3   -1.00    6.40
  -6 -14   3    5.10    7.60
  -7 -14   3   -3.30    7.60
   8 -13   3   -1.30    8.50
   7 -13   3    9.80    9.00
   6 -13   3   11.00    9.60
   5 -13   3   -8.70    5.00
   4 -13   3   22.70    9.70
   4 -13   3   12.90    6.30
   3 -13   3   14.10    7.90
   3 -13   3   -2.00    4.90
   2 -13   3   12.00    7.80
   2 -13   3    7.40    5.80
   1 -13   3   52.09   10.50
   1 -13   3   40.00   11.10
   0 -13   3   49.90   11.10
   0 -13   3   88.69   15.50
  -1 -13   3   14.10    6.50
  -1 -13   3   13.70    7.30
  -2 -13   3   55.39   12.00
  -3 -13   3   23.10    8.30
  -3 -13   3   14.60    6.40
  -4 -13   3    1.20    5.40
  -4 -13   3   13.20    6.10
  -5 -13   3   -3.40    5.30
  -5 -13   3   -2.40    4.10
  -6 -13   3    9.00    8.30
  -7 -13   3    1.80    7.60
  -8 -13   3   -3.90    7.00
   9 -12   3   -5.90    6.80
   8 -12   3   -2.80    5.70
   7 -12   3    8.70    9.20
   6 -12   3   -7.90    6.60
   5 -12   3    0.40    6.00
   4 -12   3   46.80    8.90
   4 -12   3   34.90   11.20
   3 -12   3    8.10    5.30
   3 -12   3   11.60    7.40
   2 -12   3  113.49   14.50
   2 -12   3  157.38   20.50
   1 -12   3  100.59   13.90
   1 -12   3   80.39   14.30
   0 -12   3    7.50    5.90
   0 -12   3    7.90    5.80
  -1 -12   3   33.80    9.50
  -1 -12   3   60.59   11.80
  -2 -12   3    8.00    4.60
  -2 -12   3   31.30    8.60
  -3 -12   3   24.80    8.70
  -3 -12   3   15.90    6.10
  -4 -12   3   33.80    7.70
  -4 -12   3   14.70    7.70
  -5 -12   3   15.60    8.40
  -5 -12   3   10.00    5.10
  -6 -12   3   63.59   13.90
  -7 -12   3   -0.60    6.20
  -8 -12   3   19.70   10.30
  -9 -12   3    5.80    8.20
  10 -11   3   25.40   11.30
   9 -11   3    4.60    9.00
   8 -11   3    1.70    7.30
   7 -11   3   21.60   10.70
   6 -11   3    1.30    4.90
   5 -11   3    5.80    7.30
   5 -11   3   17.50    5.50
   4 -11   3    4.30    3.80
   4 -11   3    6.40    5.50
   3 -11   3   -3.10    3.20
   3 -11   3   -3.20    3.80
   2 -11   3   15.20    5.80
   2 -11   3   17.20    7.30
   1 -11   3    0.70    4.60
   1 -11   3    2.90    5.50
   0 -11   3  437.86   27.10
   0 -11   3  355.16   23.60
  -1 -11   3   53.89   10.70
  -1 -11   3   84.59   12.70
  -2 -11   3   96.99   13.80
  -2 -11   3   63.89   10.50
  -3 -11   3   -0.40    4.10
  -3 -11   3    5.80    4.80
  -4 -11   3   25.80    8.50
  -4 -11   3   28.20    6.80
  -5 -11   3   26.10    9.70
  -5 -11   3   22.80    5.70
  -6 -11   3   -1.20    5.50
  -7 -11   3   14.40    8.00
  -8 -11   3    8.30    7.40
  -9 -11   3    5.00    7.30
 -10 -11   3   -6.90    6.30
  10 -10   3   -1.60    6.20
   9 -10   3   11.00    8.80
   8 -10   3    7.10    7.30
   7 -10   3    5.70    7.50
   6 -10   3    0.30    5.10
   5 -10   3   -4.10    4.40
   5 -10   3    4.80    3.40
   4 -10   3    5.40    4.00
   4 -10   3   19.10    7.80
   3 -10   3   23.10    5.70
   3 -10   3   14.10    6.60
   2 -10   3   15.10    6.80
   2 -10   3   22.20    5.80
   1 -10   3    8.90    5.90
   1 -10   3    5.10    4.30
   0 -10   3  105.89   13.10
   0 -10   3  108.79   14.20
  -1 -10   3  274.37   19.70
  -1 -10   3  283.47   20.10
  -2 -10   3   35.10    8.90
  -2 -10   3   27.50    7.10
  -3 -10   3    4.80    4.60
  -3 -10   3    0.80    3.20
  -4 -10   3   45.90   10.30
  -4 -10   3   47.10    7.90
  -5 -10   3   22.10    5.10
  -5 -10   3   21.20    7.60
  -6 -10   3  141.19    9.90
  -6 -10   3  113.19   17.00
  -7 -10   3   58.69   13.40
  -8 -10   3   22.80   10.40
  -9 -10   3   16.50    8.90
 -10 -10   3    1.30    7.80
  10  10  -3   15.50    7.90
 -11 -10   3   10.50    8.90
  11  10  -3    1.40    6.20
  11  -9   3   -0.10    6.20
  10  -9   3   16.50    9.20
   9  -9   3    7.70    7.60
   8  -9   3   10.30    7.00
   7  -9   3   58.29   12.90
   6  -9   3   14.10    6.90
   6  -9   3   16.50    3.90
   5  -9   3   24.50    4.60
   5  -9   3   14.30    7.00
   4  -9   3    2.20    2.80
   4  -9   3    4.10    5.10
   3  -9   3    8.60    3.90
   3  -9   3   13.90    6.50
   2  -9   3    0.60    2.90
   2  -9   3    3.40    4.40
   1  -9   3   18.40    6.70
   1  -9   3    9.40    4.50
   0  -9   3   28.90    7.10
   0  -9   3   38.00    8.50
  -1  -9   3  199.48   18.10
  -1  -9   3  225.88   16.60
  -2  -9   3   28.00    7.90
  -2  -9   3   28.60    7.10
  -3  -9   3   44.40    7.50
  -3  -9   3   34.30    8.00
  -4  -9   3   10.50    5.20
  -4  -9   3   10.40    4.10
  -5  -9   3    4.00    3.00
  -5  -9   3    9.60    5.70
  -6  -9   3   10.20    3.30
  -6  -9   3   16.10    7.00
  -7  -9   3    9.70    6.40
  -8  -9   3    9.40    7.10
   8   9  -3   11.70    6.40
  -9  -9   3   97.79   16.50
   9   9  -3  117.59   16.40
 -10  -9   3   25.90   10.00
  10   9  -3   20.00    8.20
 -11  -9   3    1.10    7.10
  11   9  -3    4.00    6.80
  12  -8   3   16.00    8.30
  11  -8   3    0.10    5.80
  10  -8   3   37.40   11.40
   9  -8   3   -5.40    4.80
   8  -8   3    6.20    6.80
   7  -8   3   30.70   10.30
   6  -8   3   24.30    8.40
   6  -8   3   21.20    3.70
   5  -8   3   98.09    7.40
   5  -8   3   99.19   14.50
   4  -8   3  220.98   12.60
   4  -8   3  266.37   20.30
   3  -8   3    8.70    3.40
   3  -8   3    3.30    3.90
   2  -8   3  155.98   11.10
   2  -8   3  152.68   16.40
   1  -8   3   67.19   10.80
   1  -8   3   67.89    8.70
   0  -8   3   53.69    9.10
   0  -8   3   48.50    8.20
  -1  -8   3   81.99   11.00
  -1  -8   3   74.89   10.10
  -2  -8   3  180.68   13.40
  -2  -8   3  184.08   17.50
  -3  -8   3  120.69   11.40
  -3  -8   3  123.69   14.40
  -4  -8   3   45.10    6.40
  -4  -8   3   44.10    9.40
  -5  -8   3  104.39    8.60
  -5  -8   3   92.59   13.80
  -6  -8   3   80.69    6.20
  -6  -8   3   96.19   14.70
  -7  -8   3   77.59   13.60
   7   8  -3   90.59   12.70
  -8  -8   3    5.70    6.40
   8   8  -3    7.70    5.30
  -9  -8   3    3.40    6.60
   9   8  -3   10.70    6.70
 -10  -8   3   18.00    9.10
  10   8  -3   -2.40    5.60
 -11  -8   3   -1.40    5.20
  11   8  -3   -3.00    6.10
 -12  -8   3   -5.80    6.40
  12   8  -3   -2.10    6.70
  12  -7   3   13.90    8.20
  12  -7   3   -2.10    6.50
  11  -7   3    0.90    5.80
  10  -7   3   10.90    7.10
   9  -7   3   35.60   10.10
   8  -7   3    1.60    5.30
   7  -7   3  270.67   25.60
   6  -7   3   -3.80    4.20
   5  -7   3   19.70    6.70
   5  -7   3   15.20    3.00
   5  -7   3   16.80    2.90
   4  -7   3   70.19    6.50
   4  -7   3   53.49    9.90
   3  -7   3   90.09   12.30
   3  -7   3  103.79    7.70
   2  -7   3  194.48   11.70
   2  -7   3  212.98   16.30
   1  -7   3   52.69    8.80
   1  -7   3   54.89    7.50
   0  -7   3  300.67   16.60
   0  -7   3  264.67   17.60
  -1  -7   3    2.60    2.80
  -1  -7   3    1.00    3.00
  -2  -7   3    1.60    3.10
  -2  -7   3    0.90    2.80
  -3  -7   3  444.96   24.80
  -3  -7   3  461.35   21.60
  -4  -7   3   94.49    7.40
  -4  -7   3   92.99   12.30
  -5  -7   3   24.10    7.00
  -5  -7   3   25.60    3.90
  -6  -7   3   -5.50    3.90
  -6  -7   3   -0.40    1.50
   6   7  -3   -3.10    2.90
  -7  -7   3  289.87   25.70
   7   7  -3  288.87   20.20
  -8  -7   3   68.79   12.50
   8   7  -3   96.89   13.80
  -9  -7   3  111.29   16.80
   9   7  -3   84.69   13.70
 -10  -7   3  -10.90    4.10
  10   7  -3   -3.90    4.40
 -11  -7   3    3.10    7.00
  11   7  -3    4.20    6.20
 -12  -7   3   -2.90    6.60
  12   7  -3   -7.10    4.50
  13   7  -3    7.40    8.20
  13  -6   3    4.60    6.40
  12  -6   3   23.90    8.80
  12  -6   3   13.80    7.70
  11  -6   3   13.50    6.70
  10  -6   3    4.10    5.20
   9  -6   3   41.50   10.10
   8  -6   3   10.50    6.20
   7  -6   3   60.09   11.50
   6  -6   3    7.50    5.00
   5  -6   3   77.39    4.60
   5  -6   3   75.49    4.60
   5  -6   3   83.79   12.10
   4  -6   3   32.20    3.80
   4  -6   3   30.40    3.30
   4  -6   3   22.50    6.70
   3  -6   3   65.99   10.00
   3  -6   3   63.09    6.10
   2  -6   3  223.98   12.00
   2  -6   3  240.38   16.20
   1  -6   3   51.69    8.10
   1  -6   3   49.50    6.50
   0  -6   3  685.13   29.10
   0  -6   3  660.33   30.80
  -1  -6   3    2.00    2.50
  -1  -6   3    0.30    2.00
  -2  -6   3  240.98   13.50
  -2  -6   3  223.38   14.70
  -3  -6   3   41.30    5.40
  -3  -6   3   40.10    7.30
  -4  -6   3   78.69    6.10
  -4  -6   3   94.69   12.00
  -5  -6   3   24.00    3.20
  -5  -6   3   29.50    7.20
   5   6  -3   21.10    5.30
  -6  -6   3   35.00    8.20
   6   6  -3   29.20    6.90
  -7  -6   3   29.60    8.60
   7   6  -3   17.40    6.40
  -8  -6   3  118.79   16.30
   8   6  -3  153.08   16.80
  -9  -6   3   -1.00    4.80
   9   6  -3   11.80    7.00
 -10  -6   3   13.40    7.80
  10   6  -3    3.20    7.00
 -11  -6   3   -1.80    4.90
  11   6  -3   -8.90    4.30
 -12  -6   3    0.70    5.90
  12   6  -3    9.00    7.90
 -13  -6   3   28.30   11.30
  13   6  -3   10.00    9.60
  13  -5   3   -0.90    7.60
  13  -5   3   -4.50    4.30
  12  -5   3   27.00    8.30
  12  -5   3   18.90    8.80
  11  -5   3   -6.80    4.30
  11  -5   3    6.60    5.80
  10  -5   3   24.10    8.00
   9  -5   3  342.17   23.40
   8  -5   3  209.48   19.90
   8  -5   3  215.18    8.90
   8  -5   3  222.38   10.00
   7  -5   3   58.59   10.60
   6  -5   3   12.90    5.10
   5  -5   3   69.09   10.70
   4  -5   3   17.80    2.20
   4  -5   3   24.30    6.20
   4  -5   3   19.90    2.40
   3  -5   3  283.27   17.70
   3  -5   3  271.97   11.70
  -3   5  -3  271.77   10.80
   2  -5   3  201.68   13.60
   2  -5   3  186.48    9.50
  -2   5  -3  177.58    8.70
   1  -5   3  157.18   11.60
   1  -5   3  143.59    8.90
   0  -5   3  297.27   14.90
   0  -5   3  292.17   16.20
  -1  -5   3    1.70    2.00
  -1  -5   3    6.70    2.60
  -2  -5   3  357.46   17.10
  -2  -5   3  385.56   19.40
  -3  -5   3   20.90    3.40
  -3  -5   3   16.50    4.50
  -4  -5   3   30.00    3.50
  -4  -5   3   20.40    6.10
   4   5  -3   27.40    5.50
   4   5  -3   25.70    4.10
  -5  -5   3    9.10    4.60
  -5  -5   3    9.20    1.90
   5   5  -3   12.80    4.50
  -6  -5   3    9.60    4.60
   6   5  -3    2.70    4.10
  -7  -5   3    2.00    4.10
   7   5  -3    1.30    4.30
  -8  -5   3  125.19   16.80
   8   5  -3  129.39   14.80
  -9  -5   3    0.20    5.20
   9   5  -3   19.40    7.30
 -10  -5   3   12.90    7.40
  10   5  -3   -1.10    5.60
 -11  -5   3   16.60    8.00
  11   5  -3   10.60    7.70
 -12  -5   3   -0.80    5.90
  12   5  -3    0.50    6.30
 -13  -5   3    4.00    7.00
  13   5  -3    4.60    7.00
  13  -4   3    5.50    6.00
  13  -4   3   12.50    7.90
  12  -4   3    8.50    6.90
  12  -4   3   -0.10    4.80
  11  -4   3   10.80    5.30
  11  -4   3   14.60    7.00
  10  -4   3   85.09   12.60
  10  -4   3   80.89   13.80
   9  -4   3   19.50    6.70
  -9   4  -3   24.40    4.10
   8  -4   3    3.60    4.60
  -8   4  -3    1.60    1.70
   7  -4   3    6.30    4.50
   7  -4   3   13.80    2.70
   6  -4   3    3.90    3.90
   5  -4   3  338.37   20.20
   4  -4   3   63.69    8.80
   3  -4   3  254.57   15.70
   3  -4   3  253.97    9.70
   2  -4   3   61.19    4.10
   2  -4   3   68.69    8.20
  -2   4  -3   55.79    3.70
   1  -4   3   11.80    2.60
   1  -4   3    6.70    3.00
  -1   4  -3   12.60    2.50
   0  -4   3    1.70    2.00
   0  -4   3    1.20    1.80
  -1  -4   3  637.74   26.20
  -2  -4   3  341.87   15.50
  -2  -4   3  378.06   18.20
  -3  -4   3  378.76   15.70
  -3  -4   3  396.26   19.90
   3   4  -3  394.26   18.00
   3   4  -3  367.56   16.60
  -4  -4   3  340.77   13.90
  -4  -4   3  334.97   19.30
   4   4  -3  372.16   17.90
   4   4  -3  342.77   14.70
  -5  -4   3  526.75   26.20
   5   4  -3  483.95   24.00
  -6  -4   3   64.79   10.10
   6   4  -3   48.80    8.20
  -7  -4   3   21.60    7.10
   7   4  -3   36.10    7.30
  -8  -4   3    9.70    6.10
   8   4  -3    6.70    5.10
  -9  -4   3    8.20    6.20
   9   4  -3    8.50    5.70
 -10  -4   3    2.20    4.80
  10   4  -3   14.00    7.10
 -11  -4   3   52.99   11.50
  11   4  -3   30.20    9.30
 -12  -4   3    5.50    6.70
  12   4  -3    2.40    6.50
 -13  -4   3   -6.50    5.40
  13   4  -3    3.40    7.30
  13  -3   3    6.20    7.00
  12  -3   3    6.80    7.60
  12  -3   3    2.90    5.00
  11  -3   3   68.59   13.30
  11  -3   3   58.79   10.20
  10  -3   3   -4.10    3.60
  10  -3   3    3.40    3.70
 -10   3  -3    0.20    2.60
   9  -3   3  211.28   15.70
   9  -3   3  198.28   20.80
  -9   3  -3  222.58   12.20
   8  -3   3   -1.30    3.50
   8  -3   3    2.10    3.60
  -8   3  -3    2.50    2.10
   7  -3   3  326.97   19.60
  -7   3  -3  344.37   14.70
   6  -3   3    3.30    2.90
   6  -3   3    1.80    1.60
  -6   3  -3    1.10    1.30
   5  -3   3  179.18    7.50
   5  -3   3  190.08   12.90
  -5   3  -3  178.38    7.40
   4  -3   3   30.40    5.70
   3  -3   3  256.27   14.50
   2  -3   3 1725.73   57.79
   2  -3   3 1686.83   64.39
  -2   3  -3 1721.73   57.59
   1  -3   3 1369.26   51.59
   1  -3   3 1335.57   47.40
  -1   3  -3 1376.76   47.40
   0  -3   3 3019.30  106.39
   0  -3   3 2972.10  102.59
   0   3  -3 2991.50  102.59
  -1  -3   3 4014.70  137.49
  -2  -3   3 1926.81   66.69
  -2  -3   3 1906.71   68.09
   2   3  -3 1864.81   67.09
   2   3  -3 1810.82   66.99
  -3  -3   3  523.45   23.20
  -3  -3   3  481.35   19.20
   3   3  -3  505.85   19.60
   3   3  -3  510.85   21.50
  -4  -3   3   -0.70    1.90
  -4  -3   3   -1.70    1.00
   4   3  -3    0.40    2.10
   4   3  -3    2.00    1.00
  -5  -3   3    3.10    2.80
   5   3  -3    4.30    1.10
   5   3  -3   -1.50    2.00
  -6  -3   3    0.20    3.10
   6   3  -3    0.40    3.20
  -7  -3   3  194.18   17.90
   7   3  -3  211.18   15.20
  -8  -3   3   21.00    6.80
   8   3  -3   26.00    6.90
  -9  -3   3   63.39   11.40
   9   3  -3   54.19   10.10
 -10  -3   3   -2.70    4.90
  10   3  -3   -1.80    4.10
 -11  -3   3   67.59   13.10
  11   3  -3   67.39   12.80
 -12  -3   3   23.30    8.90
  12   3  -3   31.80    9.70
 -13  -3   3   -0.20    5.50
  13   3  -3   -2.00    6.20
  14   3  -3   -5.50    5.80
  13  -2   3   37.10   12.10
  12  -2   3   -1.70    4.60
  12  -2   3    1.30    4.40
  11  -2   3   80.09   14.40
  11  -2   3  115.79   12.70
 -11   2  -3  110.29   11.60
  10  -2   3   24.50    8.10
  10  -2   3   45.50    7.80
 -10   2  -3   58.69    7.90
   9  -2   3    4.90    3.70
   9  -2   3    4.20    5.00
  -9   2  -3    3.10    3.00
   8  -2   3   34.20    8.30
   8  -2   3   32.20    6.50
  -8   2  -3   39.60    5.70
   7  -2   3    0.20    2.50
   7  -2   3    4.90    4.10
  -7   2  -3    3.30    2.40
   6  -2   3   44.00    6.80
  -6   2  -3   62.59    5.70
   5  -2   3    0.50    2.00
   5  -2   3    0.30    1.30
  -5   2  -3    0.80    1.30
   4  -2   3  156.78   10.40
   4  -2   3  170.68    6.80
  -4   2  -3  158.58    6.90
   3  -2   3  377.76   17.90
   2  -2   3 1726.13   63.59
   1  -2   3  176.38    7.20
   1  -2   3  165.38    9.10
  -1   2  -3  162.88    7.20
   0  -2   3 1020.30   36.70
   0  -2   3 1019.30   38.20
   0   2  -3 1043.20   36.80
  -1  -2   3 1848.81   64.19
  -1  -2   3 1822.62   63.79
   1   2  -3 1802.52   64.79
  -2  -2   3  282.27   11.70
  -2  -2   3  276.57   13.70
  -2  -2   3  278.87   12.30
   2   2  -3  270.97   12.10
   2   2  -3  275.27   11.60
  -3  -2   3  106.69    9.50
  -3  -2   3   89.49    5.40
   3   2  -3   91.09    4.90
   3   2  -3   86.39    6.50
  -4  -2   3   83.29    9.20
   4   2  -3   97.89    8.70
   4   2  -3   75.49    4.40
  -5  -2   3  563.74   26.10
   5   2  -3  546.35   20.90
   5   2  -3  566.24   25.40
  -6  -2   3   -4.20    1.90
   6   2  -3   -5.30    2.00
   6   2  -3   -0.50    1.40
  -7  -2   3   64.49    9.80
   7   2  -3   62.79    5.40
   7   2  -3   77.99    5.20
   7   2  -3   63.19    9.50
  -8  -2   3   18.60    6.30
   8   2  -3   27.60    3.40
   8   2  -3   23.10    6.80
  -9  -2   3  145.99   16.30
   9   2  -3  163.68    8.80
   9   2  -3  168.08    8.30
   9   2  -3  148.79   16.70
 -10  -2   3   22.50    8.10
  10   2  -3   12.40    6.80
 -11  -2   3    2.70    4.90
  11   2  -3   10.70    6.70
 -12  -2   3   -1.80    4.80
  12   2  -3   -3.00    5.10
 -13  -2   3   16.90    8.00
  13   2  -3   11.00    9.00
 -14  -2   3   -3.50    4.80
  14   2  -3   -0.20    6.10
  14  -1   3    0.90    8.00
  13  -1   3   -3.10    6.40
  12  -1   3    6.70    7.30
  11  -1   3    7.50    4.50
  11  -1   3    6.40    6.90
 -11   1  -3    6.70    4.20
  10  -1   3   10.30    6.50
  10  -1   3    3.50    3.60
 -10   1  -3    8.70    4.40
   9  -1   3  100.19   10.40
   9  -1   3   99.99   14.10
  -9   1  -3  128.99   12.00
   8  -1   3    8.10    5.10
   8  -1   3   10.10    3.80
  -8   1  -3    7.20    3.40
   7  -1   3  117.09   10.60
   7  -1   3  144.59   14.80
  -7   1  -3  136.49   11.00
   6  -1   3  295.87   18.60
   6  -1   3  337.47   16.90
  -6   1  -3  345.27   15.60
   5  -1   3  898.81   35.30
   5  -1   3  852.61   37.10
  -5   1  -3  870.71   32.80
   4  -1   3  351.76   17.90
   4  -1   3  368.96   14.40
   4  -1   3  350.66   16.60
  -4   1  -3  358.56   14.60
   3  -1   3    7.20    1.40
   3  -1   3    7.20    2.30
  -3   1  -3    3.80    1.30
   2  -1   3  243.18   11.50
   2  -1   3  241.08    9.00
  -2   1  -3  250.17    9.20
   1  -1   3 1179.68   40.50
   1  -1   3 1218.88   43.50
  -1   1  -3 1189.78   43.60
  -1   1  -3 1160.28   40.70
   0  -1   3 3147.08  105.59
   0  -1   3 3140.99  108.99
   0   1  -3 3102.59  105.49
   0   1  -3 3111.39  108.89
  -1  -1   3 1547.85   54.79
  -1  -1   3 1589.34   53.89
  -1  -1   3 1546.75   55.49
   1   1  -3 1559.74   54.79
   1   1  -3 1584.04   53.79
   1   1  -3 1525.75   55.19
  -2  -1   3 1990.80   71.09
  -2  -1   3 2017.20   70.89
  -2  -1   3 2030.10   70.39
   2   1  -3 1992.40   70.29
   2   1  -3 2022.90   70.79
  -3  -1   3 3896.71  135.99
  -3  -1   3 3918.21  134.49
   3   1  -3 3835.12  135.79
   3   1  -3 3962.20  135.49
  -4  -1   3   87.19    8.90
   4   1  -3   94.49    7.20
   4   1  -3   96.99    6.00
  -5  -1   3   29.40    5.90
   5   1  -3    0.60    1.70
   5   1  -3   -0.20    2.20
  -6  -1   3   11.10    4.40
   6   1  -3   10.50    4.30
  -7  -1   3   25.20    6.40
   7   1  -3   21.40    5.90
   7   1  -3   23.50    4.30
  -8  -1   3   75.09   11.10
   8   1  -3   74.49    7.70
   8   1  -3   76.19   11.10
  -9  -1   3   29.30    7.10
   9   1  -3   39.00    9.20
   9   1  -3   30.80    5.10
 -10  -1   3   -1.70    3.80
  10   1  -3    4.80    2.80
  10   1  -3   -1.20    4.20
 -11  -1   3   25.00    7.60
  11   1  -3   18.30    7.80
 -12  -1   3    0.40    4.50
  12   1  -3    0.90    5.70
 -13  -1   3    3.20    4.40
  13   1  -3   18.70    8.90
 -14  -1   3    2.80    5.90
  14   1  -3   -8.20    6.90
  14   0   3   -1.50    7.10
  13   0   3    5.80    6.80
  12   0   3   -2.90    6.30
 -12   0  -3   -1.40    4.10
  11   0   3    8.70    4.10
  11   0   3   -7.30    4.30
 -11   0  -3    9.50    5.20
  10   0   3   -0.80    2.90
  10   0   3   -0.60    5.20
 -10   0  -3   -2.70    3.10
   9   0   3   -0.70    4.20
   9   0   3    6.50    3.40
  -9   0  -3    8.90    4.20
   8   0   3   -2.70    1.90
   8   0   3   -3.30    2.90
  -8   0  -3    0.80    2.50
   7   0   3  178.48   11.00
   7   0   3  173.48   16.50
  -7   0  -3  174.48   11.60
   6   0   3    0.60    1.80
   6   0   3   -0.40    2.50
  -6   0  -3    2.40    2.20
   5   0   3   31.20    4.40
   5   0   3   11.70    4.00
  -5   0  -3   18.00    3.80
   4   0   3    0.40    1.50
   4   0   3    0.50    1.20
  -4   0  -3   -0.90    1.20
   3   0   3  400.26   18.10
   3   0   3  402.96   16.70
   3   0   3  405.96   15.70
  -3   0  -3  379.76   16.00
   2   0   3    1.80    1.50
   2   0   3    0.40    0.90
   2   0   3    0.70    1.00
  -2   0  -3   -1.40    0.90
  -2   0  -3    0.90    1.00
   1   0   3    9.10    1.90
   1   0   3    9.80    1.50
  -1   0  -3    4.70    1.10
  -1   0  -3   10.40    2.00
  -1   0  -3    7.30    1.50
   0   0   3    0.50    0.90
   0   0   3    1.30    1.20
   0   0   3    0.20    0.60
   0   0  -3   -0.40    0.90
   0   0  -3   -0.70    0.50
   0   0  -3   -0.10    1.00
  -1   0   3 1127.29   39.80
  -1   0   3 1119.09   40.80
   1   0  -3 1064.49   39.70
   1   0  -3 1125.59   40.60
  -2   0   3    0.40    0.50
  -2   0   3   -1.80    1.20
   2   0  -3    1.40    1.50
   2   0  -3   -0.20    0.90
  -3   0   3 6747.32  230.28
   3   0  -3 6851.31  234.08
   3   0  -3 6850.91  235.98
  -4   0   3    0.40    1.70
   4   0  -3    1.70    1.90
  -5   0   3   51.89    6.70
   5   0  -3   52.99    6.70
  -6   0   3   -1.40    2.40
   6   0  -3    0.30    2.50
  -7   0   3   10.50    3.80
   7   0  -3    2.90    2.80
   7   0  -3    6.50    3.90
  -8   0   3   -0.50    3.00
   8   0  -3    1.90    4.10
   8   0  -3    0.50    2.50
  -9   0   3   -1.90    3.50
   9   0  -3    0.60    2.90
   9   0  -3   -1.00    3.80
 -10   0   3   -2.10    2.30
  10   0  -3    0.30    4.10
  10   0  -3    3.30    3.40
 -11   0   3   12.80    5.20
  11   0  -3   13.90    5.20
  11   0  -3   14.50    7.20
 -12   0   3   -1.30    4.10
  12   0  -3   -4.40    5.60
 -13   0   3   -2.90    4.00
  13   0  -3    0.40    6.20
 -14   0   3   -3.40    4.90
  14   0  -3   -0.20    7.60
  14   1   3   -3.60    7.10
  13   1   3    5.00    8.60
 -13  -1  -3    6.90    5.80
  12   1   3   -0.10    7.30
 -12  -1  -3    7.00    5.90
  11   1   3    6.40    7.00
 -11  -1  -3   -0.70    4.30
  10   1   3    9.70    6.50
  10   1   3    2.30    2.70
 -10  -1  -3   -1.90    3.40
   9   1   3  107.69    9.20
   9   1   3  121.29   15.80
  -9  -1  -3  113.29   13.10
   8   1   3    7.90    5.30
   8   1   3   10.10    3.10
  -8  -1  -3    9.90    4.00
   7   1   3  128.89   14.10
   7   1   3  110.19    7.80
  -7  -1  -3  127.59   12.40
   6   1   3  309.07   18.80
   6   1   3  324.17   14.70
  -6  -1  -3  308.27   16.60
   5   1   3  909.51   38.10
   5   1   3  894.31   33.80
  -5  -1  -3  855.61   35.30
   4   1   3  379.06   18.50
   4   1   3  363.96   15.40
  -4  -1  -3  341.67   16.50
   3   1   3    5.10    1.70
   3   1   3    7.50    2.90
  -3  -1  -3    4.70    1.60
   2   1   3  226.48   10.90
   2   1   3  242.68   10.70
   2   1   3  241.88   11.80
  -2  -1  -3  241.78   10.50
   1   1   3 1188.48   42.70
   1   1   3 1098.29   41.80
   1   1   3 1197.38   40.60
  -1  -1  -3 1171.38   42.00
  -1  -1  -3 1137.79   40.70
  -1  -1  -3 1164.08   42.30
   0   1   3 3074.29  105.19
   0  -1  -3 3114.69  109.59
   0  -1  -3 3161.98  105.29
   0  -1  -3 3139.69  107.19
  -1   1   3 1616.74   58.79
  -1   1   3 1624.14   56.29
   1  -1  -3 1630.54   58.69
   1  -1  -3 1570.04   56.29
  -2   1   3 2034.60   71.09
  -3   1   3 4088.69  139.99
  -4   1   3  111.19    8.20
  -5   1   3   -0.80    1.60
  -6   1   3   19.90    5.00
   6  -1  -3   12.60    4.20
   7  -1  -3   27.20    6.30
   7  -1  -3   26.50    6.00
   8  -1  -3   67.29    9.70
   8  -1  -3   67.29   10.30
  -9   1   3   26.00    6.70
   9  -1  -3   32.30    6.90
   9  -1  -3   29.80    7.90
 -10   1   3    3.80    4.20
  10  -1  -3   -2.30    4.50
  10  -1  -3   -2.30    3.40
 -11   1   3   18.70    6.70
  11  -1  -3   20.80    6.20
  11  -1  -3   34.20    9.70
 -12   1   3    3.80    5.00
  12  -1  -3   -2.00    4.80
 -13   1   3   31.70    8.70
  13  -1  -3   22.90    8.80
 -14   1   3   -4.30    5.30
  14  -1  -3   -1.60    6.40
  13   2   3   16.20    9.30
 -13  -2  -3   26.60    8.50
  12   2   3    1.70    7.70
 -12  -2  -3   -2.90    4.10
  11   2   3   93.39   16.20
 -11  -2  -3  125.29   16.00
  10   2   3   36.80   10.20
  10   2   3   55.39    6.50
 -10  -2  -3   34.90    8.30
   9   2   3    4.20    2.70
   9   2   3   -2.50    5.40
  -9  -2  -3   12.40    5.00
   8   2   3   31.20    4.60
   8   2   3   35.30    8.80
  -8  -2  -3   37.50    7.80
   7   2   3    0.20    4.40
   7   2   3    4.60    2.40
  -7  -2  -3   -0.10    2.00
   6   2   3   56.69    9.40
   6   2   3   57.09    5.70
   5   2   3   -1.30    2.80
   5   2   3    5.70    1.90
  -5  -2  -3    2.40    2.50
   4   2   3  158.98   11.00
   4   2   3  157.88    8.30
  -4  -2  -3  157.08   10.20
  -4  -2  -3  140.19    7.80
   3   2   3  370.66   15.70
   3   2   3  350.76   17.30
  -3  -2  -3  344.27   16.50
  -3  -2  -3  373.86   15.00
   2   2   3 1606.14   58.79
   2   2   3 1635.74   59.29
  -2  -2  -3 1579.64   58.19
  -2  -2  -3 1663.83   57.79
   1   2   3  180.28    8.90
   1   2   3  162.38    9.30
  -1  -2  -3  158.88    9.00
  -1  -2  -3  168.38    8.50
   0  -2  -3 1014.90   36.50
   1  -2  -3 1854.91   64.09
  -2   2   3  287.87   13.00
  -3   2   3  102.89    7.20
  -4   2   3   82.69    8.00
  -6   2   3    1.60    2.00
  -7   2   3   73.09    9.40
   7  -2  -3   59.49    9.50
  -8   2   3   27.00    6.50
   8  -2  -3   23.70    6.30
   8  -2  -3   24.50    6.20
  -9   2   3  178.28   16.50
   9  -2  -3  200.28   19.30
   9  -2  -3  183.68   17.40
 -10   2   3   15.10    5.60
  10  -2  -3    9.20    5.40
  10  -2  -3   23.90    8.50
 -11   2   3   -2.70    3.70
  11  -2  -3   -1.80    4.40
  11  -2  -3   -4.20    4.00
 -12   2   3   -1.20    4.00
  12  -2  -3    6.10    5.00
  12  -2  -3   -1.10    5.50
 -13   2   3   20.10    7.10
  13  -2  -3   36.10   11.00
  14  -2  -3    4.50    7.10
  13   3   3    2.10    7.00
 -13  -3  -3   -0.50    4.80
  12   3   3    6.30    7.30
 -12  -3  -3    9.50    6.90
  11   3   3   59.99   13.40
 -11  -3  -3   69.69   12.20
  10   3   3   -4.00    4.90
 -10  -3  -3    4.30    3.40
   9   3   3  234.48   22.70
   9   3   3  204.28   11.10
   8   3   3    6.10    4.50
   8   3   3   -2.60    2.10
  -8  -3  -3    7.40    4.40
  -8  -3  -3    0.30    2.60
   7   3   3  290.57   13.70
   7   3   3  281.27   19.60
  -7  -3  -3  291.47   18.20
  -7  -3  -3  296.47   14.20
   6   3   3   -1.50    1.80
   6   3   3   -1.30    2.80
  -6  -3  -3    0.70    1.60
  -6  -3  -3    0.50    2.60
   5   3   3  152.78    9.00
   5   3   3  166.98   12.90
  -5  -3  -3  173.98   12.30
  -5  -3  -3  167.88    8.40
   4   3   3   32.30    5.90
   4   3   3   38.60    4.60
  -4  -3  -3   24.30    5.10
  -4  -3  -3   36.50    3.80
   3   3   3  240.68   12.40
   3   3   3  244.08   13.80
  -3  -3  -3  256.97   13.80
  -3  -3  -3  258.97   11.90
   2   3   3 1659.13   60.49
  -2  -3  -3 1610.84   59.29
   1   3   3 1344.57   49.20
  -1  -3  -3 1318.57   48.60
   0  -3  -3 3018.50  103.59
   1  -3  -3 4022.70  136.39
   2  -3  -3 1970.40   68.49
  -3   3   3  549.65   22.60
   3  -3  -3  553.04   21.80
  -4   3   3    0.10    1.00
  -5   3   3    3.20    2.40
  -6   3   3   -0.70    2.00
  -7   3   3  198.78   13.10
   7  -3  -3  225.18   16.80
  -8   3   3   26.20    5.70
   8  -3  -3   24.30    7.50
  -9   3   3   50.19    8.30
   9  -3  -3   64.99   11.20
   9  -3  -3   53.69   10.40
 -10   3   3    2.30    3.80
  10  -3  -3   -0.70    4.20
  10  -3  -3   11.30    6.20
 -11   3   3   92.49   11.90
  11  -3  -3  101.79   15.90
  11  -3  -3   83.39   12.80
 -12   3   3   34.10    8.10
  12  -3  -3   22.20    8.70
  12  -3  -3   20.60    7.10
 -13   3   3    3.80    4.80
  13  -3  -3   -1.50    5.70
  14  -3  -3   -2.90    6.80
  13   4   3   -3.00    6.70
 -13  -4  -3   -0.40    6.50
  12   4   3   -6.40    6.00
 -12  -4  -3   -2.20    4.00
  11   4   3   -4.10    5.50
 -11  -4  -3    1.50    5.60
  10   4   3   69.89   13.10
 -10  -4  -3   91.69   14.50
   9   4   3    5.50    5.90
  -9  -4  -3   10.80    5.60
   8   4   3   -2.50    3.70
  -8  -4  -3   -0.20    3.70
   7   4   3   10.70    5.10
  -7  -4  -3   18.50    5.90
  -7  -4  -3   11.50    2.50
   6   4   3    4.50    3.70
  -6  -4  -3    5.10    1.90
  -6  -4  -3    6.00    4.30
   5   4   3  298.77   18.40
  -5  -4  -3  307.47   13.20
  -5  -4  -3  319.67   18.70
   4   4   3   41.90    7.20
  -4  -4  -3   44.00    7.00
   3   4   3  224.58   13.70
  -3  -4  -3  236.18   13.90
   2   4   3   52.39    6.50
  -2  -4  -3   58.89    6.90
  -1  -4  -3   11.00    2.90
   0  -4  -3    0.50    1.60
   1  -4  -3 1366.76   49.50
   2  -4  -3  349.57   15.30
   3  -4  -3  418.26   17.70
   4  -4  -3  381.36   16.70
  -5   4   3  571.94   24.50
  -6   4   3   58.09    7.10
   6  -4  -3   56.09   10.20
  -7   4   3   18.00    4.60
   7  -4  -3   26.00    7.60
  -8   4   3    8.50    3.70
   8  -4  -3    7.30    5.80
  -9   4   3    3.70    3.70
   9  -4  -3   -3.80    4.20
 -10   4   3    2.00    3.50
  10  -4  -3    6.60    5.70
 -11   4   3   30.10    6.90
  11  -4  -3   36.80   10.10
  11  -4  -3   56.29   11.90
 -12   4   3   -2.30    3.40
  12  -4  -3   12.50    6.80
  12  -4  -3    2.70    6.20
  13  -4  -3    2.00    6.70
  13  -4  -3   -1.70    6.40
  13   5   3    6.30    8.70
 -13  -5  -3   -4.70    5.70
  12   5   3   24.90   10.00
 -12  -5  -3   30.10   10.20
  11   5   3   10.90    7.90
 -11  -5  -3    1.20    5.10
  10   5   3   20.60    8.60
 -10  -5  -3   54.89   12.30
   9   5   3  303.17   22.50
  -9  -5  -3  301.57   22.30
   8   5   3  190.38   19.50
  -8  -5  -3  197.88   19.50
   7   5   3   22.10    6.70
  -7  -5  -3   40.30    8.70
  -7  -5  -3   40.10    3.70
   6   5   3   22.50    6.60
  -6  -5  -3   38.40    3.90
  -6  -5  -3   31.70    7.50
   5   5   3   72.79   10.20
  -5  -5  -3   65.49    9.40
   4   5   3   12.90    4.80
  -4  -5  -3   14.20    5.10
   3   5   3  256.87   15.20
  -3  -5  -3  250.47   15.40
  -2  -5  -3  197.68   12.80
  -1  -5  -3  137.29    9.70
   0  -5  -3  267.37   14.10
   1  -5  -3    2.70    2.00
   2  -5  -3  379.96   17.10
   3  -5  -3   20.00    3.70
   4  -5  -3   26.90    4.20
   5  -5  -3    9.60    3.00
   6  -5  -3   13.40    3.40
   6  -5  -3    9.40    5.70
  -7   5   3   -0.50    2.50
   7  -5  -3   -0.60    2.30
   7  -5  -3   -1.10    4.00
  -8   5   3  137.99   12.10
   8  -5  -3  106.19   15.80
  -9   5   3    3.10    3.50
   9  -5  -3   -1.60    4.50
 -10   5   3    7.20    4.20
  10  -5  -3    1.80    5.90
 -11   5   3   12.40    4.70
  11  -5  -3    2.80    6.20
  12  -5  -3    1.90    6.00
  12  -5  -3    5.40    6.70
  13  -5  -3   -1.00    6.30
  13  -5  -3    2.10    6.10
  13   6   3   -1.80    5.90
  12   6   3   15.70    9.10
 -12  -6  -3   13.10    8.30
  11   6   3   31.40   10.70
 -11  -6  -3   20.40    9.10
  10   6   3   14.50    7.40
 -10  -6  -3   19.20    7.70
   9   6   3   24.80    9.10
  -9  -6  -3   49.30   11.40
   8   6   3   11.10    6.60
  -8  -6  -3    9.00    6.00
   7   6   3   77.99   12.30
  -7  -6  -3   54.79    4.20
  -7  -6  -3   49.10   10.20
   6   6   3   12.70    6.00
  -6  -6  -3    5.10    4.80
  -5  -6  -3   69.89   10.60
   4   6   3   25.90    6.20
  -4  -6  -3   20.60    6.10
   3   6   3   58.39    8.20
  -3  -6  -3   53.69    8.30
  -2  -6  -3  199.88   13.50
  -1  -6  -3   59.59    8.10
   0  -6  -3  669.13   28.90
   1  -6  -3    3.40    2.40
   2  -6  -3  236.88   13.10
   3  -6  -3   43.30    5.80
   4  -6  -3  105.19    7.80
   5  -6  -3   23.70    4.30
   5  -6  -3   29.60    8.10
   6  -6  -3   35.50    9.10
   6  -6  -3   39.50    5.70
   7  -6  -3   20.70    4.50
   7  -6  -3   34.60    9.40
   8  -6  -3  141.89   10.40
   8  -6  -3  160.88   20.30
   9  -6  -3   -3.90    2.70
   9  -6  -3   -4.30    4.70
  10  -6  -3    9.10    4.40
  10  -6  -3   14.00    8.00
  11  -6  -3    3.50    4.00
  11  -6  -3    7.70    6.70
  12  -6  -3   -1.10    5.80
  12  -6  -3    0.00    5.80
  13  -6  -3   28.50   10.10
  13  -6  -3   20.00    9.30
  12   7   3    7.00    8.10
 -12  -7  -3    8.00    7.30
  11   7   3    2.00    7.60
 -11  -7  -3   18.30    8.30
  10   7   3    9.40    7.70
 -10  -7  -3    4.90    6.60
   9   7   3   23.00    8.30
  -9  -7  -3   43.00   10.90
   8   7   3   -1.70    4.40
  -8  -7  -3   -4.60    3.60
   7   7   3  231.18   21.70
  -7  -7  -3  228.68   11.50
  -7  -7  -3  224.48   22.20
   6   7   3    8.20    5.40
  -6  -7  -3    2.90    4.10
   5   7   3    3.80    4.60
  -5  -7  -3    5.60    4.60
   4   7   3   62.89    9.20
  -4  -7  -3   47.20    9.10
  -3  -7  -3   77.99   10.40
  -2  -7  -3  186.08   14.00
  -1  -7  -3   42.00    7.30
   0  -7  -3  287.37   16.60
   1  -7  -3   -2.30    2.30
   2  -7  -3    3.40    2.50
   3  -7  -3  455.75   21.40
   4  -7  -3  102.79    9.60
   5  -7  -3   29.00    5.20
   5  -7  -3   31.00    9.30
   6  -7  -3    2.50    2.80
   6  -7  -3   -3.00    3.70
   7  -7  -3  246.08   25.70
   7  -7  -3  298.07   15.60
   8  -7  -3   89.39   16.20
   8  -7  -3   99.39    9.70
   9  -7  -3   96.29   16.50
   9  -7  -3  122.09   11.00
  10  -7  -3    1.40    3.10
  10  -7  -3    1.90    6.30
  11  -7  -3    2.00    6.80
  12  -7  -3    2.00    7.30
  13  -7  -3    4.20    7.10
  12   8   3    1.80    6.70
 -12  -8  -3    3.20    7.40
  11   8   3   -9.70    4.50
 -11  -8  -3   -0.80    6.90
  10   8   3   10.00    8.00
 -10  -8  -3    5.60    6.60
   9   8   3   -4.90    3.70
  -9  -8  -3   -1.30    5.00
   8   8   3    1.20    5.20
  -8  -8  -3    9.70    6.70
   7   8   3   27.10    9.00
  -7  -8  -3   22.60    7.20
  -7  -8  -3   26.10    4.60
   6   8   3   11.80    5.90
  -6  -8  -3   14.80    4.30
  -6  -8  -3   11.60    6.00
   5   8   3  109.19   13.60
  -5  -8  -3   74.39   12.50
  -4  -8  -3  185.98   18.10
  -3  -8  -3    7.50    4.20
  -2  -8  -3  134.39   14.20
  -1  -8  -3   47.20    8.10
   0  -8  -3   29.90    6.10
   1  -8  -3   98.59   10.80
   2  -8  -3  161.88   11.90
   3  -8  -3  129.09   12.20
   4  -8  -3   33.10    6.00
   4  -8  -3   28.50    8.30
   5  -8  -3  108.39   17.30
   5  -8  -3  112.19   10.80
   6  -8  -3  129.19   18.80
   6  -8  -3  112.99   10.80
   7  -8  -3  104.99   18.10
   7  -8  -3   92.19    9.90
   8  -8  -3    0.10    3.40
   8  -8  -3    3.40    6.60
   9  -8  -3    2.00    7.20
   9  -8  -3    8.70    4.20
  10  -8  -3   25.60   10.00
  10  -8  -3   18.80    5.00
  11  -8  -3   -9.00    5.10
  12  -8  -3    1.00    7.00
  11   9   3   -3.10    5.00
 -11  -9  -3   10.70    8.40
  10   9   3   10.20    7.20
 -10  -9  -3   13.90    8.00
   9   9   3   20.00    8.30
  -9  -9  -3   18.10    8.70
   8   9   3   31.40    9.50
  -8  -9  -3   31.50   10.70
   7   9   3   27.20    8.60
  -7  -9  -3   54.49   11.50
  -6  -9  -3   10.60    4.20
  -6  -9  -3   11.80    6.90
  -5  -9  -3   15.70    6.90
  -5  -9  -3   18.10    5.30
  -4  -9  -3    1.90    4.00
  -3  -9  -3    7.50    4.60
  -2  -9  -3   -2.40    3.30
  -1  -9  -3    2.30    4.00
   0  -9  -3   21.10    5.90
   1  -9  -3  200.78   14.40
   2  -9  -3   18.10    7.90
   2  -9  -3   33.00    6.70
   3  -9  -3   47.80   11.50
   3  -9  -3   23.20    6.00
   4  -9  -3    6.30    5.60
   4  -9  -3    2.10    3.20
   5  -9  -3    6.10    3.80
   5  -9  -3   11.40    6.30
   6  -9  -3   14.80    5.10
   6  -9  -3   25.60   10.40
   7  -9  -3   18.40    8.70
   7  -9  -3   14.40    4.90
   8  -9  -3    5.70    7.10
   8  -9  -3    9.10    4.00
   9  -9  -3  111.99   19.70
   9  -9  -3  162.88   13.70
  10  -9  -3   45.40   13.20
  11  -9  -3    6.00    8.70
  10  10   3    7.90    6.60
 -10 -10  -3    1.70    5.90
   9  10   3   -4.50    4.20
  -9 -10  -3    4.50    5.80
   8  10   3   16.40    7.00
  -8 -10  -3   23.20    9.60
  -7 -10  -3    2.60    5.70
  -6 -10  -3    2.00    3.50
  -6 -10  -3    9.50    6.00
  -5 -10  -3    2.70    4.80
  -5 -10  -3    0.50    3.40
  -4 -10  -3   10.80    6.20
  -4 -10  -3    2.00    3.60
  -3 -10  -3   11.00    5.60
  -3 -10  -3   14.60    6.70
  -2 -10  -3   10.50    5.70
  -2 -10  -3    3.20    3.20
  -1 -10  -3    7.80    5.60
  -1 -10  -3    3.40    4.80
   0 -10  -3  119.99   14.00
   0 -10  -3   93.59   14.70
   1 -10  -3  247.48   17.50
   1 -10  -3  270.37   25.50
   2 -10  -3   28.10    9.60
   2 -10  -3   38.00    7.40
   3 -10  -3    1.90    3.50
   3 -10  -3   -0.90    4.70
   4 -10  -3   53.69   12.70
   4 -10  -3   70.09   10.00
   5 -10  -3   18.40    5.80
   5 -10  -3   25.00   10.40
   6 -10  -3  168.58   23.80
   6 -10  -3  166.98   15.00
   7 -10  -3   81.09   16.90
   7 -10  -3   50.29    8.40
   8 -10  -3   60.79    9.00
   8 -10  -3   57.29   15.20
   9 -10  -3    7.20    7.50
  10 -10  -3   -1.10    7.50
  11 -10  -3   19.90   11.40
  10  11   3   22.00    9.40
 -10 -11  -3   26.00   11.30
  -9 -11  -3   10.00    7.40
  -8 -11  -3    2.10    6.30
  -7 -11  -3   34.00   10.60
  -6 -11  -3   -3.60    3.80
  -6 -11  -3   -4.60    4.90
  -5 -11  -3   17.70    7.90
  -5 -11  -3   20.90    6.30
  -4 -11  -3    0.70    4.90
  -4 -11  -3    9.10    5.20
  -3 -11  -3   -1.70    4.60
  -3 -11  -3   -4.10    3.80
  -2 -11  -3    0.80    3.00
  -2 -11  -3   19.80    6.80
  -1 -11  -3   -0.60    4.80
  -1 -11  -3   -2.90    4.80
   0 -11  -3  385.86   27.20
   0 -11  -3  347.27   23.60
   1 -11  -3   78.39   14.30
   1 -11  -3   85.19   12.50
   2 -11  -3  135.99   15.30
   2 -11  -3  132.69   19.80
   3 -11  -3    4.00    4.00
   3 -11  -3    2.60    6.70
   4 -11  -3   42.90   12.80
   4 -11  -3   29.60    7.40
   5 -11  -3   26.90   11.80
   5 -11  -3   19.60    6.10
   6 -11  -3   -4.20    3.30
   6 -11  -3   12.40    8.30
   7 -11  -3   18.10    6.50
   7 -11  -3    4.40    8.10
   8 -11  -3   15.90    6.30
   8 -11  -3   19.30   11.30
   9 -11  -3   10.00    9.50
  10 -11  -3   -5.90    6.20
  -9 -12  -3    3.20    7.20
  -8 -12  -3   -7.40    6.00
  -7 -12  -3    6.40    7.30
  -6 -12  -3   12.30    7.10
  -5 -12  -3   -0.50    5.30
  -5 -12  -3   -5.20    3.90
  -4 -12  -3   34.10    8.60
  -4 -12  -3   38.30   10.60
  -3 -12  -3    1.70    5.00
  -3 -12  -3    9.20    7.00
  -2 -12  -3   97.09   15.40
  -1 -12  -3  114.29   17.10
  -1 -12  -3   83.69   13.60
   0 -12  -3   -5.90    5.60
   0 -12  -3    3.30    4.90
   1 -12  -3   37.40   11.10
   1 -12  -3   42.20   10.20
   2 -12  -3   56.49   10.20
   2 -12  -3   60.09   14.10
   3 -12  -3   18.00    8.70
   3 -12  -3   14.10    6.50
   4 -12  -3   26.20    7.10
   4 -12  -3   24.90   11.70
   5 -12  -3   13.00    5.40
   5 -12  -3   13.00    8.80
   6 -12  -3   71.59   10.90
   6 -12  -3   67.19   16.20
   7 -12  -3    1.90    8.10
   7 -12  -3    4.20    4.30
   8 -12  -3   48.20   15.20
   9 -12  -3   30.20   13.00
  -8 -13  -3   12.20    9.00
  -7 -13  -3   14.50    8.70
  -6 -13  -3   -4.50    6.00
  -5 -13  -3    0.00    4.40
  -5 -13  -3   -2.50    4.60
  -4 -13  -3   24.60    8.10
  -4 -13  -3   18.80    9.10
  -3 -13  -3    8.20    6.00
  -3 -13  -3    3.40    6.60
  -2 -13  -3    1.90    4.60
  -2 -13  -3   16.60    8.50
  -1 -13  -3   49.30   12.50
  -1 -13  -3   58.19   11.80
   0 -13  -3   60.89   11.70
   0 -13  -3   87.59   16.20
   1 -13  -3   13.10    8.00
   1 -13  -3    8.80    5.80
   2 -13  -3   49.10   13.40
   2 -13  -3   58.59   11.80
   3 -13  -3    8.60    5.30
   3 -13  -3   10.70    9.40
   4 -13  -3    4.30    8.30
   4 -13  -3    4.40    4.90
   5 -13  -3    4.40    8.50
   5 -13  -3    1.60    4.80
   6 -13  -3    2.10    9.20
   6 -13  -3   10.20    6.20
   7 -13  -3   14.50   10.20
   8 -13  -3   22.00   11.60
  -7 -14  -3    2.50    6.80
  -6 -14  -3   23.50   10.20
  -5 -14  -3   18.00    9.50
  -4 -14  -3   21.70    9.80
  -4 -14  -3   10.20    6.80
  -3 -14  -3    3.10    5.70
  -3 -14  -3    9.60    7.50
  -2 -14  -3   15.60    7.90
  -2 -14  -3   48.60   11.90
  -1 -14  -3   -2.90    5.10
  -1 -14  -3   -7.70    4.60
   0 -14  -3    6.90    5.90
   0 -14  -3    8.00    7.70
   1 -14  -3    3.90    7.20
   1 -14  -3    6.10    5.60
   2 -14  -3    6.20    8.30
   2 -14  -3    1.30    5.80
   3 -14  -3   34.00    9.80
   3 -14  -3    9.90    9.70
   4 -14  -3    1.60    5.90
   4 -14  -3   -2.10    7.00
   5 -14  -3    6.20    8.70
   5 -14  -3    0.70    5.10
   6 -14  -3    2.60    6.60
   6 -14  -3    1.00    5.10
   7 -14  -3    4.50    8.10
  -5 -15  -3   -9.60    5.10
  -4 -15  -3    0.60    6.70
  -4 -15  -3    1.40    7.70
  -3 -15  -3   10.00    8.70
  -3 -15  -3   -0.90    6.10
  -2 -15  -3    1.00    5.40
  -2 -15  -3    2.60    6.60
  -1 -15  -3   15.80    8.70
  -1 -15  -3   12.20    8.20
   0 -15  -3    7.00    8.30
   0 -15  -3   -7.10    5.40
   1 -15  -3   13.40    9.70
   1 -15  -3   14.70    7.80
   2 -15  -3   10.20    6.60
   2 -15  -3   -3.70    6.70
   3 -15  -3    3.00    7.10
   3 -15  -3    0.80    7.50
   4 -15  -3    7.50    8.40
   4 -15  -3    6.30    6.70
   5 -15  -3   12.10    9.90
   5 -15  -3   15.00    8.10
  -2 -16  -3   -3.60    6.00
  -2 -16  -3   -4.20    5.90
  -1 -16  -3    9.50    8.90
  -1 -16  -3    2.40    6.90
   0 -16  -3    0.60    8.20
   0 -16  -3    6.40    7.50
   1 -16  -3   -1.60    6.20
   1 -16  -3   12.50    8.80
   2 -16  -3   14.10    9.10
   2 -16  -3    5.30    8.60
   3 -16  -3   10.30    7.30
   3 -16  -3   -4.50    5.70
   2 -16   4    1.10    6.60
   1 -16   4   -0.90    6.40
   1 -16   4    8.70    7.70
   0 -16   4    0.80    6.70
   0 -16   4   -4.20    6.00
  -1 -16   4    2.60    6.90
  -1 -16   4   15.90    8.70
  -2 -16   4    2.00    6.60
  -2 -16   4   -2.30    4.50
   5 -15   4    5.70    7.30
   4 -15   4    4.10    8.30
   3 -15   4    4.50    7.60
   2 -15   4   10.30    6.90
   2 -15   4   25.30   10.80
   1 -15   4   38.80   11.60
   1 -15   4   39.20   10.40
   0 -15   4    8.90    7.00
   0 -15   4    0.70    6.50
  -1 -15   4   46.60   12.20
  -1 -15   4   43.70   11.50
  -2 -15   4   -4.90    3.70
  -2 -15   4    1.40    7.00
  -3 -15   4    4.30    6.60
  -3 -15   4    8.90    6.40
  -4 -15   4   -5.70    4.80
  -4 -15   4    1.80    7.00
  -5 -15   4    5.70    7.60
   6 -14   4    6.60    7.90
   5 -14   4   23.50   10.80
   4 -14   4   -6.70    6.70
   3 -14   4   22.50    6.60
   3 -14   4   16.90    9.40
   2 -14   4   13.70    7.10
   2 -14   4   15.80    9.00
   1 -14   4   57.79   11.20
   1 -14   4   24.40   10.10
   0 -14   4    5.10    6.10
   0 -14   4    2.90    5.90
  -1 -14   4    1.30    5.90
  -1 -14   4    3.20    5.70
  -2 -14   4   11.90    7.90
  -2 -14   4   -1.80    3.70
  -3 -14   4   11.90    8.10
  -3 -14   4   13.60    6.90
  -4 -14   4    6.40    5.70
  -4 -14   4    9.30    6.90
  -5 -14   4   70.69   14.90
  -6 -14   4    9.80    9.00
  -7 -14   4   -3.20    6.60
   8 -13   4   37.20   12.90
   7 -13   4   24.30   10.30
   6 -13   4    5.40    8.20
   5 -13   4    0.40    6.80
   4 -13   4   -0.80    6.10
   3 -13   4    0.80    4.30
   3 -13   4    1.80    6.80
   2 -13   4   -9.30    4.00
   2 -13   4   11.30    5.80
   1 -13   4    7.50    6.90
   1 -13   4   19.30    6.80
   0 -13   4   82.59   13.40
   0 -13   4   73.29   13.80
  -1 -13   4    7.70    5.90
  -1 -13   4    7.70    5.80
  -2 -13   4   31.10    9.40
  -3 -13   4   44.30   11.20
  -3 -13   4   53.79   10.50
  -4 -13   4   85.49   15.70
  -4 -13   4  101.19   13.00
  -5 -13   4    4.90    5.90
  -5 -13   4    2.40    4.40
  -6 -13   4   -2.90    6.80
  -7 -13   4    5.80    7.60
  -8 -13   4    6.90    7.00
   9 -12   4   20.60   10.50
   8 -12   4    8.20    8.30
   7 -12   4   28.80   10.70
   6 -12   4   32.40   11.30
   5 -12   4   32.70   11.40
   4 -12   4   72.09   10.00
   4 -12   4   46.00   12.60
   3 -12   4  135.59   14.80
   3 -12   4   97.39   16.00
   2 -12   4   10.70    7.60
   2 -12   4    1.70    5.30
   1 -12   4  182.58   18.10
   1 -12   4  147.99   19.50
   0 -12   4   61.79   12.60
  -1 -12   4   62.59   11.80
  -1 -12   4   48.80   10.30
  -2 -12   4   -0.60    2.70
  -2 -12   4   -7.30    3.60
  -3 -12   4   17.40    6.40
  -3 -12   4   16.90    7.90
  -4 -12   4    0.90    3.90
  -4 -12   4    7.10    6.40
  -5 -12   4   -4.50    3.30
  -5 -12   4    4.80    6.20
  -6 -12   4    5.30    7.80
  -7 -12   4   -6.70    5.80
  -8 -12   4   -4.90    6.10
  -9 -12   4    2.10    7.70
  10 -11   4   11.70    9.40
   9 -11   4    0.30    6.20
   8 -11   4   18.40    8.60
   7 -11   4    1.40    6.80
   6 -11   4   -1.60    5.20
   5 -11   4    3.70    7.10
   5 -11   4   13.50    4.70
   4 -11   4    8.00    6.70
   4 -11   4    9.30    4.70
   3 -11   4    0.00    3.70
   3 -11   4    2.20    5.80
   2 -11   4    1.10    3.50
   2 -11   4   -3.20    4.80
   1 -11   4    2.50    4.50
   1 -11   4   -1.30    5.30
   0 -11   4    3.30    4.70
   0 -11   4    3.90    5.30
  -1 -11   4  128.39   16.00
  -1 -11   4  127.99   15.90
  -2 -11   4   74.49   12.30
  -3 -11   4   -1.90    3.90
  -3 -11   4    5.70    4.80
  -4 -11   4   10.40    6.20
  -4 -11   4   15.00    5.50
  -5 -11   4  -10.30    3.60
  -5 -11   4   -2.50    3.20
  -6 -11   4   -0.10    5.60
  -7 -11   4    0.00    6.00
  -8 -11   4   33.10   10.90
  -9 -11   4   14.10    8.10
 -10 -11   4   -3.10    7.00
  10 -10   4    8.00    7.40
   9 -10   4    5.40    6.70
   8 -10   4    2.80    5.30
   7 -10   4    0.50    6.40
   6 -10   4   13.40    7.40
   5 -10   4    5.10    3.30
   5 -10   4    3.30    5.50
   4 -10   4    1.10    4.80
   4 -10   4    0.40    2.80
   3 -10   4   84.39   10.20
   3 -10   4   94.99   15.20
   2 -10   4    6.20    5.70
   2 -10   4   19.40    5.60
   1 -10   4   51.49    9.10
   1 -10   4   50.49   10.50
   0 -10   4  137.79   16.10
   0 -10   4  139.59   15.40
  -1 -10   4    0.80    4.40
  -1 -10   4    0.40    4.20
  -2 -10   4  147.39   16.80
  -3 -10   4   51.19    8.50
  -3 -10   4   33.00    9.30
  -4 -10   4   36.30    6.90
  -4 -10   4   22.80    8.00
  -5 -10   4   66.49    8.40
  -5 -10   4   89.09   15.40
  -6 -10   4  104.69   16.50
  -6 -10   4   85.79    8.60
  -7 -10   4   20.60    8.50
  -8 -10   4   75.89   15.10
  -9 -10   4    1.00    6.60
 -10 -10   4   -3.00    5.70
 -11 -10   4    4.50    8.00
  11  10  -4    5.80    6.60
  11  -9   4   20.50    9.00
  10  -9   4    4.00    6.70
   9  -9   4   -2.10    5.10
   8  -9   4    0.30    5.50
   7  -9   4    7.00    6.90
   6  -9   4   74.69   14.30
   5  -9   4   15.60    3.60
   5  -9   4    3.40    5.30
   4  -9   4   20.00    7.50
   4  -9   4   33.50    5.60
   3  -9   4    2.20    2.90
   3  -9   4   -2.50    4.20
   2  -9   4  233.78   21.70
   2  -9   4  182.08   13.20
   1  -9   4   56.69    8.70
   1  -9   4   51.79   10.00
   0  -9   4   90.69   11.70
   0  -9   4   79.29   11.10
  -1  -9   4    3.70    3.80
  -1  -9   4    6.30    4.20
  -2  -9   4   41.80    7.90
  -2  -9   4   67.59   11.10
  -3  -9   4   14.30    4.70
  -3  -9   4    6.20    5.40
  -4  -9   4   13.40    4.40
  -4  -9   4   14.90    7.00
  -5  -9   4   62.59   12.10
  -5  -9   4   40.20    6.00
  -6  -9   4   22.60    7.90
  -6  -9   4   18.50    3.90
  -7  -9   4    5.50    6.80
  -8  -9   4   90.79   16.20
  -9  -9   4   17.70    8.10
   9   9  -4   27.70    8.70
 -10  -9   4   10.60    8.00
  10   9  -4   23.80    7.90
 -11  -9   4    3.10    7.20
  11   9  -4    6.20    6.80
  11  -8   4   22.00    8.90
  10  -8   4   14.90    7.70
   9  -8   4    4.30    5.20
   8  -8   4    1.90    5.50
   7  -8   4   45.20   11.30
   6  -8   4   52.09   11.10
   5  -8   4    4.80    5.10
   5  -8   4    9.60    2.70
   5  -8   4   16.30    3.00
   4  -8   4    3.80    2.30
   4  -8   4    4.30    5.10
   3  -8   4   -1.00    3.50
   3  -8   4    1.70    2.20
   2  -8   4   44.40    6.60
   2  -8   4   50.79    9.70
   1  -8   4   -0.30    3.20
   1  -8   4   -0.60    2.60
   0  -8   4   10.00    4.90
   0  -8   4   11.80    4.40
  -1  -8   4   39.80    7.30
  -1  -8   4   59.39    9.30
  -2  -8   4   49.70    8.70
  -2  -8   4   67.69    9.10
  -3  -8   4    6.30    4.30
  -3  -8   4    7.20    3.60
  -4  -8   4   42.10    9.20
  -4  -8   4   45.60    6.40
  -5  -8   4   18.00    4.00
  -5  -8   4   11.40    6.50
  -6  -8   4   76.99    6.50
  -6  -8   4   57.39   12.00
  -7  -8   4   12.40    6.30
   7   8  -4    8.60    6.30
  -8  -8   4   -3.40    5.30
   8   8  -4   11.00    6.10
  -9  -8   4   36.20   11.60
   9   8  -4   37.50    9.70
 -10  -8   4   71.39   15.00
  10   8  -4   45.20   11.50
 -11  -8   4   -5.40    6.10
  11   8  -4   -1.80    5.40
 -12  -8   4   16.80   11.00
  12   8  -4   17.40    9.50
  12  -7   4    2.40    6.60
  12  -7   4    5.70    6.40
  11  -7   4   34.40    9.90
  10  -7   4   55.59   11.90
   9  -7   4  189.28   20.60
   8  -7   4   79.49   13.80
   7  -7   4   61.09   11.10
   6  -7   4   74.59   12.90
   5  -7   4   44.80    9.80
   4  -7   4    1.30    3.40
   4  -7   4    4.10    2.00
  -4   7  -4    5.10    1.70
   3  -7   4  156.48    9.40
   3  -7   4  154.18   16.50
   2  -7   4   14.00    3.70
   2  -7   4   10.20    5.20
   1  -7   4   61.89    9.60
   1  -7   4   98.79    9.70
   0  -7   4  348.07   20.10
   0  -7   4  335.77   18.20
  -1  -7   4    1.10    2.50
  -1  -7   4    1.40    2.60
  -2  -7   4   31.40    6.80
  -2  -7   4   33.40    6.10
  -3  -7   4    0.50    2.80
  -3  -7   4   -2.10    2.00
  -4  -7   4    7.90    3.00
  -4  -7   4    9.20    4.90
  -5  -7   4   -2.10    3.50
  -5  -7   4    4.00    2.10
  -6  -7   4   23.50    8.20
  -6  -7   4   35.70    4.10
   6   7  -4   29.80    7.00
  -7  -7   4   99.49   14.30
   7   7  -4   93.69   12.90
  -8  -7   4  371.16   26.70
   8   7  -4  360.26   23.80
  -9  -7   4   35.50   10.80
   9   7  -4   16.30    7.00
 -10  -7   4   82.99   16.00
  10   7  -4  100.99   15.10
 -11  -7   4   26.10   10.20
  11   7  -4    7.70    7.40
 -12  -7   4   -3.90    5.50
  12   7  -4    1.20    6.80
  12  -6   4    2.40    5.80
  12  -6   4    2.60    5.80
  11  -6   4   25.80    9.50
  11  -6   4   25.30    8.90
  10  -6   4    9.70    5.90
   9  -6   4   13.90    6.80
   8  -6   4   -4.20    3.60
   7  -6   4    6.20    5.50
   6  -6   4  114.89   14.20
   5  -6   4   64.19   10.70
   4  -6   4  270.17   18.60
   4  -6   4  228.78   10.00
   4  -6   4  237.78    9.60
   3  -6   4    3.40    4.00
   3  -6   4    9.50    2.40
  -3   6  -4   14.90    2.40
   2  -6   4   50.69    5.70
   2  -6   4   53.89    8.80
   1  -6   4    5.10    2.40
   1  -6   4    1.50    2.80
   0  -6   4   -2.20    1.70
   0  -6   4    1.90    2.20
  -1  -6   4  153.18   11.60
  -1  -6   4  190.08   12.10
  -2  -6   4  126.59   12.90
  -2  -6   4  127.89    9.40
  -3  -6   4   -0.10    1.80
  -3  -6   4   -1.60    2.70
  -4  -6   4  243.88   12.30
  -4  -6   4  249.58   17.40
  -5  -6   4    3.50    1.60
  -5  -6   4   -1.20    3.10
   5   6  -4   -0.30    3.30
  -6  -6   4   55.99    4.60
  -6  -6   4   52.39   10.10
   6   6  -4   45.40    8.20
  -7  -6   4   13.30    5.90
   7   6  -4   32.60    7.40
  -8  -6   4    0.60    5.30
   8   6  -4    0.60    4.60
  -9  -6   4   37.20   10.10
   9   6  -4   29.60    8.70
 -10  -6   4   -2.00    5.60
  10   6  -4   -3.20    4.20
 -11  -6   4    0.80    6.60
  11   6  -4   -4.50    5.90
 -12  -6   4    8.70    8.20
  12   6  -4    2.80    6.80
 -13  -6   4    5.50    8.10
  13   6  -4    5.80    8.30
  13  -5   4    2.30    5.80
  13  -5   4    3.10    6.20
  12  -5   4   12.30    6.90
  12  -5   4   13.40    8.00
  11  -5   4    1.10    4.40
  11  -5   4    3.30    5.10
  10  -5   4   -1.10    3.70
  10  -5   4    5.00    5.90
   9  -5   4   43.90    9.60
   8  -5   4  313.97   21.60
   7  -5   4   24.90    6.70
   6  -5   4   95.29   12.60
   5  -5   4   13.70    5.10
   4  -5   4   21.60    5.60
   3  -5   4 1140.09   47.30
   3  -5   4 1100.59   38.70
  -3   5  -4 1088.19   37.90
   2  -5   4 1053.89   43.20
   2  -5   4 1008.90   36.90
  -2   5  -4  977.50   36.20
   1  -5   4  688.53   31.00
   1  -5   4  689.13   27.40
   0  -5   4  748.63   30.20
   0  -5   4  730.03   31.80
  -1  -5   4   30.90    5.50
  -1  -5   4   32.10    5.10
  -2  -5   4 2005.20   72.89
  -2  -5   4 1974.50   73.99
  -3  -5   4  448.46   22.90
  -3  -5   4  424.86   18.70
  -4  -5   4  473.95   24.80
  -4  -5   4  470.15   19.40
   4   5  -4  479.45   22.50
  -5  -5   4   81.89    5.70
  -5  -5   4   85.29   11.70
   5   5  -4   89.19    6.40
   5   5  -4   89.99   10.20
  -6  -5   4  243.78   21.50
   6   5  -4  263.97   16.60
  -7  -5   4   46.30    9.80
   7   5  -4   55.09    9.20
  -8  -5   4   42.70    9.60
   8   5  -4   53.99    9.90
  -9  -5   4   35.30    9.90
   9   5  -4   36.20    9.10
 -10  -5   4    1.70    5.70
  10   5  -4   12.20    6.40
 -11  -5   4   -2.30    5.30
  11   5  -4    1.90    5.50
 -12  -5   4    1.10    6.50
  12   5  -4    0.40    6.10
 -13  -5   4   -4.60    6.40
  13   5  -4   -4.80    6.00
  13  -4   4    2.10    5.20
  13  -4   4    1.90    6.10
  12  -4   4   28.70    8.30
  12  -4   4   13.80    7.90
  11  -4   4    1.50    5.80
  11  -4   4   -5.80    3.30
  10  -4   4    2.40    4.90
  10  -4   4    5.30    6.50
   9  -4   4   31.70    8.80
   9  -4   4   28.70    7.40
   8  -4   4   60.39   10.10
   7  -4   4    7.40    4.30
   6  -4   4   15.20    5.10
   5  -4   4 1058.09   45.60
   4  -4   4  251.67   16.10
   3  -4   4  624.34   29.00
   2  -4   4  805.32   34.40
   2  -4   4  797.22   28.80
   1  -4   4  528.75   23.40
   1  -4   4  497.35   20.00
  -1   4  -4  482.75   19.90
   0  -4   4 1456.85   52.19
   0  -4   4 1404.96   54.29
  -1  -4   4  104.19    7.50
  -1  -4   4  104.69    9.10
  -2  -4   4    9.10    3.10
  -2  -4   4    5.70    2.20
  -3  -4   4   71.09    5.30
  -3  -4   4   67.99    8.80
   3   4  -4   95.39    8.20
  -4  -4   4  132.69    7.30
  -4  -4   4  114.29   12.00
   4   4  -4  132.79    9.40
   4   4  -4  121.39    7.40
  -5  -4   4  212.28   15.50
  -5  -4   4  219.28   10.20
   5   4  -4  212.58   10.00
   5   4  -4  213.78   13.70
  -6  -4   4   54.39    9.30
   6   4  -4   54.09    8.50
  -7  -4   4   60.49   10.80
   7   4  -4   74.79   10.50
  -8  -4   4    1.70    4.70
   8   4  -4    4.50    5.40
  -9  -4   4   84.49   14.00
   9   4  -4   79.19   12.50
 -10  -4   4    4.30    5.40
  10   4  -4   12.80    7.10
 -11  -4   4   29.10    9.90
  11   4  -4   10.50    6.50
 -12  -4   4    3.80    6.20
  12   4  -4    2.50    6.90
 -13  -4   4   -4.10    4.70
  13   4  -4   -4.60    6.10
  13  -3   4   -4.10    5.60
  12  -3   4   13.60    7.60
  12  -3   4   21.50    7.10
  11  -3   4    2.10    4.90
  11  -3   4    4.40    6.00
  10  -3   4  138.59   15.00
  10  -3   4  139.59   18.10
   9  -3   4   39.30    9.50
   9  -3   4   30.60    7.10
  -9   3  -4   36.70    5.20
   8  -3   4   35.80    7.00
   8  -3   4   38.00    8.90
  -8   3  -4   46.10    5.10
   7  -3   4   -0.20    2.80
   7  -3   4    0.70    1.50
  -7   3  -4    1.50    1.50
   6  -3   4  140.99   13.30
   5  -3   4  194.38   13.30
   4  -3   4   54.19    7.10
   3  -3   4  470.55   22.30
   2  -3   4 1303.57   49.99
   2  -3   4 1257.07   43.90
  -2   3  -4 1307.07   44.00
   1  -3   4  238.98   12.80
   1  -3   4  240.48   10.50
  -1   3  -4  247.78   10.70
   0  -3   4 1114.19   41.30
   0  -3   4 1037.10   39.20
  -1  -3   4  168.08    9.70
  -1  -3   4  154.08    8.80
  -2  -3   4   94.89    5.90
  -2  -3   4   78.79    8.00
  -3  -3   4    0.60    1.10
  -3  -3   4   -0.80    1.70
   3   3  -4    1.40    1.90
   3   3  -4    3.50    1.60
  -4  -3   4   19.90    5.00
  -4  -3   4   26.10    3.40
   4   3  -4   28.20    3.20
   4   3  -4   29.50    4.80
  -5  -3   4   18.40    2.90
  -5  -3   4   17.30    5.20
   5   3  -4   24.20    2.80
   5   3  -4   14.30    4.30
  -6  -3   4   46.20    8.10
   6   3  -4   42.90    7.10
   6   3  -4   47.70    3.70
  -7  -3   4   10.20    4.80
   7   3  -4   15.30    5.40
  -8  -3   4   74.39   11.90
   8   3  -4   87.59   11.90
  -9  -3   4   25.80    8.00
   9   3  -4   23.90    8.10
 -10  -3   4  115.79   16.40
  10   3  -4  101.89   14.70
 -11  -3   4   -1.40    4.30
  11   3  -4   -2.60    4.70
 -12  -3   4   11.70    6.40
  12   3  -4   13.70    7.70
 -13  -3   4   -1.90    4.80
  13   3  -4    2.70    6.60
  14   3  -4   21.30   10.30
  13  -2   4    4.00    7.90
  12  -2   4   16.90    8.80
  12  -2   4   37.40    8.30
  11  -2   4   -0.30    4.00
  11  -2   4   16.10    8.40
  10  -2   4   32.60   10.00
  10  -2   4   39.00    7.60
 -10   2  -4   33.70    6.00
   9  -2   4   14.00    6.80
   9  -2   4    4.00    4.10
  -9   2  -4   11.80    3.80
   8  -2   4   55.29   10.80
   8  -2   4   49.90    7.80
  -8   2  -4   75.39    7.30
   7  -2   4   22.10    6.20
   7  -2   4   14.70    4.30
  -7   2  -4   18.50    3.70
   6  -2   4    0.30    2.20
   6  -2   4    7.00    4.10
   6  -2   4    4.60    1.90
  -6   2  -4    4.40    1.90
   5  -2   4   80.59    4.60
   5  -2   4   80.39    8.70
  -5   2  -4   77.19    4.80
   4  -2   4  126.19    9.00
   4  -2   4  117.29    5.00
  -4   2  -4  130.89    5.50
   3  -2   4   93.39    8.50
   2  -2   4   67.89    6.80
  -2   2  -4   87.19    3.60
  -2   2  -4   79.69    4.00
   1  -2   4  426.56   18.50
   1  -2   4  416.66   16.10
  -1   2  -4  425.56   16.10
   0  -2   4   65.49    5.60
   0  -2   4   66.69    5.20
   0   2  -4   63.69    5.60
  -1  -2   4 2997.20  105.99
  -1  -2   4 3037.10  104.09
  -2  -2   4 2002.30   71.79
  -2  -2   4 2040.10   72.09
  -2  -2   4 2033.70   70.99
   2   2  -4 1984.00   71.49
   2   2  -4 2021.10   70.79
  -3  -2   4  613.54   26.10
  -3  -2   4  605.24   23.70
   3   2  -4  600.94   23.90
   3   2  -4  580.04   22.90
  -4  -2   4    1.00    1.50
  -4  -2   4    1.50    2.70
   4   2  -4    4.50    1.60
   4   2  -4    3.10    2.30
  -5  -2   4    8.70    3.30
   5   2  -4    2.30    1.70
   5   2  -4    0.40    2.70
  -6  -2   4    0.10    2.50
   6   2  -4    3.30    3.30
   6   2  -4    0.00    1.60
  -7  -2   4  104.69   12.50
   7   2  -4   80.89   10.50
   7   2  -4   99.79    6.60
  -8  -2   4   16.90    6.10
   8   2  -4    8.50    2.70
   8   2  -4   10.10    3.00
   8   2  -4    9.50    5.50
  -9  -2   4  106.99   14.20
   9   2  -4   79.09    6.50
   9   2  -4   69.59   11.40
 -10  -2   4    6.60    5.40
  10   2  -4   11.70    6.40
 -11  -2   4   -4.60    4.30
  11   2  -4   -2.90    5.30
 -12  -2   4   -3.40    3.80
  12   2  -4    2.20    6.40
 -13  -2   4   11.40    7.30
  13   2  -4   11.60    8.40
 -14  -2   4    5.70    6.20
  14   2  -4   -1.60    6.80
  13  -1   4   16.30    9.30
  12  -1   4   17.20    9.00
  11  -1   4    8.70    5.00
  11  -1   4    7.60    7.20
 -11   1  -4   22.80    6.00
  10  -1   4  213.08   23.40
  10  -1   4  236.68   15.60
 -10   1  -4  221.98   14.90
   9  -1   4   -3.30    3.90
   9  -1   4    2.10    3.20
  -9   1  -4    0.50    2.90
   8  -1   4   89.99   10.00
   8  -1   4   90.59   12.40
  -8   1  -4  127.89   10.90
   7  -1   4   48.40    8.70
   7  -1   4   61.09    7.60
  -7   1  -4   74.89    7.60
   6  -1   4  359.66   20.20
   6  -1   4  336.37   17.10
  -6   1  -4  319.87   15.30
   5  -1   4  426.56   20.20
   5  -1   4  466.95   22.70
  -5   1  -4  435.36   18.20
   4  -1   4  127.39    6.30
   4  -1   4  132.19    8.70
   4  -1   4  136.09    9.80
  -4   1  -4  120.49    6.80
   3  -1   4   10.60    1.60
   3  -1   4    6.90    2.40
  -3   1  -4   10.00    1.80
   2  -1   4  547.35   22.90
  -2   1  -4  565.54   20.10
  -2   1  -4  550.14   19.70
   1  -1   4 3368.46  113.69
   1  -1   4 3443.16  118.79
  -1   1  -4 3332.27  113.89
   0  -1   4  743.83   27.90
   0  -1   4  754.42   28.80
   0   1  -4  765.12   27.90
  -1  -1   4 1151.68   41.80
  -1  -1   4 1109.09   41.00
  -1  -1   4 1123.29   39.00
   1   1  -4 1111.79   41.90
  -2  -1   4  871.51   32.90
  -2  -1   4  841.52   30.70
   2   1  -4  857.31   32.00
   2   1  -4  829.92   30.70
  -3  -1   4 1439.36   51.69
  -3  -1   4 1368.86   50.79
  -3  -1   4 1377.76   52.09
   3   1  -4 1406.66   50.89
   3   1  -4 1410.26   50.99
  -4  -1   4  162.38   11.10
   4   1  -4  170.78    9.90
  -5  -1   4  427.66   21.70
   5   1  -4  434.96   20.50
  -6  -1   4    6.20    3.80
   6   1  -4    2.30    2.90
  -7  -1   4    5.40    3.50
   7   1  -4   -0.20    3.00
  -8  -1   4   14.00    5.70
   8   1  -4   19.70    4.60
   8   1  -4    6.10    4.80
  -9  -1   4   -1.30    3.50
   9   1  -4    1.10    2.80
   9   1  -4   -1.60    4.30
 -10  -1   4   30.50    8.20
  10   1  -4   19.30    7.70
  10   1  -4   30.80    5.70
 -11  -1   4   -2.30    4.20
  11   1  -4    6.60    6.60
 -12  -1   4   -7.40    3.40
  12   1  -4   -0.90    6.00
 -13  -1   4    3.20    5.90
  13   1  -4   -3.40    5.80
 -14  -1   4    1.80    4.50
  14   1  -4   -4.20    6.20
  13   0   4    4.90    7.70
  12   0   4   74.19   15.30
 -12   0  -4  113.19   15.20
  11   0   4   -1.10    2.90
  11   0   4    3.50    5.90
 -11   0  -4   -0.10    3.90
  10   0   4    4.20    3.20
  10   0   4   -4.90    4.70
 -10   0  -4    4.10    4.00
   9   0   4    3.50    3.00
   9   0   4    0.80    4.70
  -9   0  -4   -3.30    2.70
   8   0   4   16.30    4.20
   8   0   4   25.90    7.70
  -8   0  -4   25.50    5.80
   7   0   4    0.60    2.30
   7   0   4   -2.80    3.20
  -7   0  -4   -3.70    1.80
   6   0   4    6.10    3.80
   6   0   4    8.00    3.10
  -6   0  -4   13.50    3.60
   5   0   4   -2.50    2.30
   5   0   4   -2.70    1.30
  -5   0  -4   -0.60    1.40
   4   0   4  143.59   10.00
   4   0   4  140.79    8.50
  -4   0  -4  145.59    8.30
   3   0   4    0.30    1.20
   3   0   4   -1.10    1.20
   3   0   4   -0.10    1.10
  -3   0  -4    4.80    1.70
   2   0   4   60.59    5.40
   2   0   4   56.39    3.70
   2   0   4   59.89    5.90
  -2   0  -4   58.79    3.90
   1   0   4   -3.20    0.90
   1   0   4   -0.30    0.90
   1   0   4   -0.30    0.80
  -1   0  -4    1.70    1.20
  -1   0  -4   -0.90    0.80
  -1   0  -4    0.30    0.60
   0   0   4  211.08    9.70
   0   0   4  225.48   10.60
   0   0   4  210.78    8.30
   0   0  -4  203.98    9.80
   0   0  -4  208.68    8.20
  -1   0   4   -0.50    1.30
  -1   0   4   -0.40    1.70
   1   0  -4    0.20    1.70
  -2   0   4 9974.60  340.47
  -2   0   4 9999.00  330.97
   2   0  -4 9645.73  336.27
  -3   0   4    1.40    2.10
   3   0  -4   -0.90    1.20
  -4   0   4  312.37   15.90
   4   0  -4  283.27   14.10
  -5   0   4   -2.80    1.80
   5   0  -4   -2.80    1.70
  -6   0   4  884.21   37.20
   6   0  -4  844.12   36.30
  -7   0   4   -2.60    2.50
   7   0  -4    6.70    3.60
  -8   0   4    4.90    4.00
   8   0  -4    1.10    3.40
   8   0  -4    1.20    2.60
  -9   0   4    3.90    4.30
   9   0  -4   -0.50    4.10
   9   0  -4    0.50    3.10
 -10   0   4    7.70    5.00
  10   0  -4   13.40    5.00
  10   0  -4   24.20    8.60
 -11   0   4   -4.00    3.60
  11   0  -4   -1.60    3.30
  11   0  -4   -3.00    5.20
 -12   0   4    1.20    3.30
  12   0  -4   -6.50    5.60
 -13   0   4    0.50    4.60
  13   0  -4    0.50    6.40
 -14   0   4   31.00    9.80
  14   0  -4   49.80   13.00
  13   1   4   17.90   10.50
  12   1   4   13.00    8.30
 -12  -1  -4    9.70    6.30
  11   1   4    9.60    7.40
 -11  -1  -4   17.40    6.50
  10   1   4  218.68   22.70
  10   1   4  232.18   13.80
 -10  -1  -4  250.57   20.60
   9   1   4   -1.10    2.20
   9   1   4   -0.20    5.00
  -9  -1  -4    1.30    3.70
   8   1   4   87.89   12.80
   8   1   4  100.89    9.00
  -8  -1  -4  112.19   12.30
   7   1   4   67.99    6.90
   7   1   4   76.99   11.30
  -7  -1  -4   65.19    8.70
   6   1   4  372.46   16.60
   6   1   4  331.27   20.40
  -6  -1  -4  347.77   18.10
   5   1   4  436.96   22.50
   5   1   4  435.36   19.00
  -5  -1  -4  437.46   20.20
   4   1   4  130.79   10.10
   4   1   4  127.59    8.00
  -4  -1  -4  140.79    8.70
   3   1   4   10.00    3.00
   3   1   4    9.20    2.40
  -3  -1  -4    5.20    1.80
   2   1   4  549.05   22.50
   2   1   4  525.65   22.10
   1   1   4 3360.36  118.79
  -1  -1  -4 3341.27  117.09
  -1  -1  -4 3410.06  114.09
   0   1   4  751.82   26.60
   0   1   4  724.53   29.20
   0  -1  -4  715.33   26.80
   0  -1  -4  741.03   26.70
  -1   1   4 1160.78   43.80
  -1   1   4 1127.99   41.60
  -2   1   4  857.01   32.90
  -3   1   4 1422.06   52.49
  -4   1   4  150.88   10.20
  -5   1   4  425.56   20.90
  -6   1   4   12.20    4.30
   6  -1  -4    9.10    3.80
  -7   1   4    6.40    3.60
   7  -1  -4    0.40    3.00
  -8   1   4   39.70    7.60
   8  -1  -4   27.20    6.40
   8  -1  -4   16.40    5.80
  -9   1   4    2.10    3.30
   9  -1  -4    5.20    4.30
   9  -1  -4   -0.20    4.00
  10  -1  -4   29.90    8.20
  10  -1  -4   23.10    6.80
 -11   1   4    0.30    4.30
  11  -1  -4    1.70    5.70
  11  -1  -4    8.00    4.90
 -12   1   4    1.20    4.30
  12  -1  -4    2.20    6.00
 -13   1   4   -0.20    5.70
  13  -1  -4    3.20    6.30
 -14   1   4    3.90    5.50
  14  -1  -4    3.30    7.80
  13   2   4   -7.60    6.50
 -13  -2  -4   -3.20    5.70
  12   2   4   33.00   11.70
 -12  -2  -4   28.80    8.60
  11   2   4    0.90    5.70
 -11  -2  -4   18.60    7.10
  10   2   4   22.20    5.00
  10   2   4   31.30   10.20
 -10  -2  -4   36.20    9.00
   9   2   4   13.30    3.90
   9   2   4   14.40    7.10
  -9  -2  -4   17.00    6.20
   8   2   4   57.29    6.60
   8   2   4   37.90    9.60
  -8  -2  -4   72.79    9.80
   7   2   4   12.50    5.30
   7   2   4   20.60    4.00
  -7  -2  -4   15.80    4.90
   6   2   4    2.30    3.90
   6   2   4    3.30    2.40
  -6  -2  -4   -1.30    1.60
   5   2   4   90.29    7.70
   5   2   4   77.69    9.90
   4   2   4  123.09   11.10
   4   2   4  115.79    7.60
  -4  -2  -4  115.09    8.40
   3   2   4  101.69    7.10
   3   2   4   88.99    8.80
  -3  -2  -4   91.09    8.10
   2   2   4   94.29    6.90
   2   2   4   70.49    6.80
  -2  -2  -4   82.19    6.00
   1   2   4  409.46   17.60
   1   2   4  416.56   18.80
  -1  -2  -4  425.76   17.40
   0   2   4   77.19    7.70
   0  -2  -4   64.69    5.60
   0  -2  -4   59.69    4.50
   1  -2  -4 3044.30  103.79
  -2   2   4 2018.60   71.09
  -3   2   4  639.94   26.30
  -4   2   4    2.80    2.20
  -5   2   4    1.00    2.10
  -6   2   4   -0.50    2.20
  -7   2   4   36.30    6.70
  -8   2   4    0.30    1.90
   8  -2  -4    5.30    4.30
   8  -2  -4   13.40    5.40
  -9   2   4   63.29   10.10
   9  -2  -4  102.99   13.80
   9  -2  -4   83.69   12.00
 -10   2   4   18.60    6.20
  10  -2  -4   13.70    6.40
  10  -2  -4   23.00    8.40
 -11   2   4    4.50    4.40
  11  -2  -4    3.10    5.20
  11  -2  -4    2.20    5.20
 -12   2   4    5.40    5.20
  12  -2  -4   -3.60    4.00
  12  -2  -4    8.60    6.50
 -13   2   4   24.80    8.10
  13  -2  -4   20.50    9.00
  14  -2  -4    3.40    7.90
  13   3   4   -0.60    7.40
 -13  -3  -4   -0.20    6.00
  12   3   4   10.90    8.60
 -12  -3  -4    8.20    6.50
  11   3   4    8.50    6.80
 -11  -3  -4   13.10    7.00
  10   3   4  104.09   15.80
 -10  -3  -4  132.89   16.00
   9   3   4   38.30    5.60
   9   3   4   28.20    8.70
   8   3   4   43.70    9.50
   8   3   4   43.10    5.80
   7   3   4    2.20    4.00
   7   3   4   -1.90    2.00
  -7  -3  -4    3.70    3.40
   6   3   4  133.59    9.00
   6   3   4  132.99   14.00
  -6  -3  -4  168.68   15.30
   5   3   4  179.58   13.30
   5   3   4  195.48   11.00
  -5  -3  -4  169.18   12.60
   4   3   4   67.49    7.00
   4   3   4   56.49    7.90
  -4  -3  -4   73.29    8.60
   3   3   4  468.05   21.70
   3   3   4  449.86   20.50
  -3  -3  -4  455.95   21.00
   2   3   4 1257.47   48.10
   2   3   4 1249.18   47.60
  -2  -3  -4 1244.08   46.70
   1   3   4  244.28   12.30
  -1  -3  -4  260.27   12.60
   1  -3  -4  163.98    8.80
   2  -3  -4   92.29    6.20
  -3   3   4    0.00    1.60
  -4   3   4   32.30    5.30
  -5   3   4   25.40    5.10
  -6   3   4   -0.20    1.20
  -7   3   4    9.80    3.90
  -8   3   4   64.09    8.90
   8  -3  -4   85.59   12.40
  -9   3   4   13.20    5.20
   9  -3  -4   27.40    8.30
   9  -3  -4   25.10    7.20
 -10   3   4  100.69   12.10
  10  -3  -4  105.89   14.60
  10  -3  -4   64.39   11.60
 -11   3   4   12.10    5.20
  11  -3  -4    7.20    6.00
  11  -3  -4   -0.30    4.90
 -12   3   4   43.50    9.20
  12  -3  -4   22.30    8.20
  12  -3  -4   29.20    9.90
 -13   3   4   -4.30    4.60
  13  -3  -4    6.10    7.50
  14  -3  -4   23.00   10.70
  13   4   4   -1.40    5.60
 -13  -4  -4    1.90    5.90
  12   4   4   22.40   10.20
 -12  -4  -4   24.00    9.30
  11   4   4   -3.80    4.40
 -11  -4  -4   -2.30    3.20
  10   4   4    5.90    6.90
 -10  -4  -4    8.60    6.10
   9   4   4   23.30    4.10
   9   4   4   10.80    6.50
  -9  -4  -4   30.50    8.30
   8   4   4   48.50    5.80
   8   4   4   35.10    8.80
  -8  -4  -4   37.50    8.40
   7   4   4    2.40    4.90
   7   4   4    7.60    3.20
  -7  -4  -4   12.40    5.10
   6   4   4   19.90    6.00
   6   4   4   19.80    4.20
  -6  -4  -4   19.40    5.70
   5   4   4  979.50   39.10
   5   4   4  968.60   42.70
  -5  -4  -4 1035.20   42.60
   4   4   4  237.28   14.90
  -4  -4  -4  218.98   14.30
   3   4   4  548.05   25.40
  -3  -4  -4  556.84   25.30
   2   4   4  780.42   32.80
  -2  -4  -4  805.32   32.60
  -1  -4  -4  516.75   22.60
   0  -4  -4 1490.35   54.49
   1  -4  -4   96.19    6.80
   2  -4  -4    9.50    2.70
   3  -4  -4   84.89    6.40
   4  -4  -4  133.89    8.50
  -5   4   4   -0.60    1.10
  -6   4   4   65.29    8.00
  -7   4   4   67.89    8.60
  -8   4   4   17.30    5.30
   8  -4  -4   17.50    6.80
  -9   4   4   91.79   11.20
   9  -4  -4   76.29   13.20
 -10   4   4    5.90    4.30
  10  -4  -4    5.00    5.80
 -11   4   4   23.20    6.80
  11  -4  -4   11.40    6.60
  11  -4  -4   34.40    9.80
 -12   4   4   19.10    6.50
  12  -4  -4   14.40    7.80
  12  -4  -4   14.50    7.20
  13  -4  -4   -1.10    6.10
  13  -4  -4    5.30    6.50
  13   5   4   -2.80    6.90
 -13  -5  -4   -2.20    6.00
  12   5   4   16.10    7.90
 -12  -5  -4   -2.70    5.90
  11   5   4   -2.00    5.40
 -11  -5  -4   -8.20    4.60
  10   5   4    6.00    6.00
 -10  -5  -4   -3.10    4.10
   9   5   4   48.60   11.00
  -9  -5  -4   28.40    8.80
   8   5   4  257.07   20.00
  -8  -5  -4  282.87   20.50
   7   5   4    8.10    5.10
  -7  -5  -4    7.00    5.70
   6   5   4   95.29   12.40
  -6  -5  -4   69.59   10.60
   5   5   4   10.90    4.80
  -5  -5  -4   13.40    5.20
  -4  -5  -4   19.50    5.60
   3   5   4 1126.89   45.70
  -3  -5  -4 1106.79   45.50
  -2  -5  -4  922.31   37.90
  -1  -5  -4  640.04   27.80
   0  -5  -4  715.23   29.70
   1  -5  -4   26.70    4.60
   2  -5  -4 2067.09   73.69
   3  -5  -4  456.25   20.00
   4  -5  -4  489.25   21.10
   5  -5  -4   87.79    8.00
   6  -5  -4  266.47   14.10
  -7   5   4   54.09    7.70
   7  -5  -4   61.39   11.50
  -8   5   4   39.80    6.90
   8  -5  -4   51.59   11.70
  -9   5   4   35.70    7.00
   9  -5  -4   29.60    9.70
 -10   5   4    8.50    4.50
  10  -5  -4    6.30    6.10
 -11   5   4    2.00    4.50
  11  -5  -4   -0.60    5.20
 -12   5   4    0.50    3.70
  12  -5  -4    6.10    6.10
  12  -5  -4   -3.50    5.70
  13  -5  -4   -7.30    4.70
  13  -5  -4    4.20    6.40
  12   6   4    6.10    6.60
 -12  -6  -4    0.50    5.50
  11   6   4   14.60    8.20
 -11  -6  -4   31.20   10.10
  10   6   4    9.30    6.30
 -10  -6  -4    0.30    5.40
   9   6   4    6.80    6.80
  -9  -6  -4   13.30    6.90
   8   6   4   11.20    6.40
  -8  -6  -4    4.80    5.30
   7   6   4    9.90    5.90
  -7  -6  -4   11.50    6.60
   6   6   4   83.59   12.20
  -6  -6  -4  104.59   14.10
   5   6   4   43.40    8.40
  -5  -6  -4   53.99    9.50
   4   6   4  224.98   15.80
  -4  -6  -4  230.18   16.10
   3   6   4   14.90    4.70
  -3  -6  -4    9.00    4.10
  -2  -6  -4   49.30    7.60
  -1  -6  -4   -1.30    1.70
   0  -6  -4   -2.70    1.90
   1  -6  -4  152.28   10.40
   2  -6  -4  138.99    9.70
   3  -6  -4    0.70    2.20
   4  -6  -4  241.58   13.20
   5  -6  -4    0.20    2.20
   6  -6  -4   51.09    6.70
   7  -6  -4   24.10    8.70
   7  -6  -4   20.80    4.70
   8  -6  -4   10.70    6.70
   8  -6  -4   -0.80    2.80
   9  -6  -4   31.50   10.30
   9  -6  -4   37.20    6.70
  10  -6  -4   -2.50    2.80
  10  -6  -4    0.50    5.20
  11  -6  -4    5.50    4.20
  11  -6  -4   -3.70    4.80
  12  -6  -4   14.20    7.60
  12  -6  -4   12.50    8.00
  13  -6  -4    6.90    7.70
  13  -6  -4    8.70    7.90
  12   7   4   -8.00    5.20
 -12  -7  -4   -3.60    5.70
  11   7   4   22.00    9.90
 -11  -7  -4   31.10   10.00
  10   7   4   42.30   11.60
 -10  -7  -4   38.70   10.90
   9   7   4  236.38   24.30
  -9  -7  -4  247.58   24.90
   8   7   4   94.29   14.90
  -8  -7  -4   71.39   12.80
   7   7   4   72.59   12.20
  -7  -7  -4   50.09   11.10
   6   7   4   59.69   10.40
  -6  -7  -4   79.49   13.00
   5   7   4   38.90    8.20
  -5  -7  -4   31.20    7.30
   4   7   4    5.40    4.10
  -4  -7  -4    2.90    3.30
  -3  -7  -4  123.29   13.20
  -2  -7  -4   19.10    5.60
  -1  -7  -4   53.69    8.30
   0  -7  -4  327.77   18.20
   1  -7  -4   -0.70    2.30
   2  -7  -4   27.40    5.50
   3  -7  -4    0.50    2.50
   4  -7  -4   12.90    3.80
   5  -7  -4    3.40    2.70
   6  -7  -4   29.40    5.50
   6  -7  -4   15.30    8.00
   7  -7  -4  104.49   17.00
   7  -7  -4   98.59   10.00
   8  -7  -4  342.07   17.90
   8  -7  -4  329.67   31.10
   9  -7  -4   19.60   10.10
   9  -7  -4   20.70    5.20
  10  -7  -4   89.09   16.30
  10  -7  -4   85.99    9.80
  11  -7  -4   18.80    9.50
  11  -7  -4   20.00    5.50
  12  -7  -4   -3.50    6.90
  13  -7  -4   -1.20    6.40
  12   8   4   -3.20    6.60
  11   8   4   -2.90    6.40
 -11  -8  -4    1.10    6.50
  10   8   4   13.30    7.70
 -10  -8  -4   29.90   10.20
   9   8   4    0.80    5.50
  -9  -8  -4   10.70    6.80
   8   8   4   -7.80    4.10
  -8  -8  -4    2.90    5.50
   7   8   4   10.20    6.30
  -7  -8  -4   20.30    7.90
   6   8   4   54.09   10.80
  -6  -8  -4   63.29   12.30
   5   8   4   11.30    5.20
  -5  -8  -4    6.20    4.80
  -4  -8  -4    5.50    4.40
  -3  -8  -4   -2.10    2.50
  -2  -8  -4   37.10    7.80
  -1  -8  -4    0.30    2.80
   0  -8  -4   17.90    5.00
   1  -8  -4   34.30    6.80
   2  -8  -4   68.69    8.90
   3  -8  -4    3.20    3.20
   4  -8  -4   52.09    7.70
   5  -8  -4   11.00    7.10
   5  -8  -4   18.20    4.70
   6  -8  -4   72.29    8.80
   6  -8  -4   75.39   15.00
   7  -8  -4   14.70    4.80
   7  -8  -4   24.10    9.20
   8  -8  -4    0.30    3.30
   8  -8  -4   -2.20    6.40
   9  -8  -4   54.89    7.90
   9  -8  -4   60.39   14.70
  10  -8  -4   30.10   11.50
  10  -8  -4   56.59    8.10
  11  -8  -4    1.20    6.70
  12  -8  -4   17.10   10.10
  11   9   4    9.20    7.00
 -11  -9  -4    5.10    7.70
  10   9   4   -4.30    5.20
 -10  -9  -4   -7.10    5.80
   9   9   4    0.90    5.90
  -9  -9  -4   -2.70    5.60
   8   9   4    0.40    5.00
  -8  -9  -4    1.30    5.00
   7   9   4    1.20    4.90
  -7  -9  -4    1.20    5.50
  -6  -9  -4   80.29   14.50
  -5  -9  -4   14.20    7.10
  -4  -9  -4   28.90    8.10
  -3  -9  -4   -1.60    2.90
  -2  -9  -4  168.28   17.60
  -1  -9  -4   51.09    9.20
   0  -9  -4   87.99   11.50
   1  -9  -4    7.10    4.30
   2  -9  -4   50.59    8.40
   3  -9  -4    9.20    4.60
   4  -9  -4   17.80    5.40
   4  -9  -4    9.20    6.10
   5  -9  -4   48.30    8.00
   5  -9  -4   46.80   11.90
   6  -9  -4   14.40    4.80
   6  -9  -4   19.10    8.60
   7  -9  -4    6.30    7.80
   7  -9  -4   14.90    4.90
   8  -9  -4   76.29    9.60
   8  -9  -4   55.09   13.90
   9  -9  -4   34.40   12.90
   9  -9  -4   17.10    5.50
  10  -9  -4   26.40   10.60
  11  -9  -4    1.90    7.60
  10  10   4    6.30    7.30
 -10 -10  -4   13.10    8.40
   9  10   4    5.60    7.00
  -9 -10  -4   11.50    7.40
   8  10   4    8.60    6.40
  -8 -10  -4   -2.80    4.20
  -7 -10  -4    7.30    6.80
  -6 -10  -4    8.10    4.20
  -6 -10  -4   16.90    8.00
  -5 -10  -4    3.40    4.20
  -4 -10  -4   -8.60    3.20
  -3 -10  -4   69.09   11.90
  -2 -10  -4   13.00    6.10
  -1 -10  -4   28.60    7.50
   0 -10  -4  124.29   14.40
   1 -10  -4    1.20    3.50
   2 -10  -4  118.69   13.40
   3 -10  -4   41.60    8.00
   3 -10  -4   43.40   12.00
   4 -10  -4   34.90    7.40
   4 -10  -4   21.30    9.40
   5 -10  -4   51.09   13.70
   5 -10  -4   93.49   11.40
   6 -10  -4   82.79   10.80
   6 -10  -4  102.09   18.70
   7 -10  -4    8.80    8.10
   7 -10  -4   18.70    6.00
   8 -10  -4   74.39   17.20
   8 -10  -4  104.69   12.20
   9 -10  -4   -3.20    6.30
   9 -10  -4    0.40    3.70
  10 -10  -4    3.80    6.40
  11 -10  -4   -7.20    6.90
  10  11   4    9.60    6.00
 -10 -11  -4   -3.90    6.70
  -9 -11  -4   16.50    8.30
  -8 -11  -4   10.30    7.30
  -7 -11  -4    3.60    6.70
  -6 -11  -4    2.50    4.20
  -6 -11  -4   -2.10    4.50
  -5 -11  -4    6.70    6.70
  -5 -11  -4   12.60    5.50
  -4 -11  -4   10.20    6.00
  -4 -11  -4   11.50    6.50
  -3 -11  -4    7.10    5.20
  -3 -11  -4   11.40    6.30
  -2 -11  -4    3.10    5.20
  -2 -11  -4   -4.80    2.80
  -1 -11  -4   -0.50    5.20
  -1 -11  -4   -0.20    5.00
   0 -11  -4   -2.80    5.10
   0 -11  -4    0.40    3.50
   1 -11  -4  118.59   14.70
   1 -11  -4  117.89   16.80
   2 -11  -4   41.90    8.60
   2 -11  -4   51.29   11.80
   3 -11  -4    2.10    3.90
   3 -11  -4    5.20    6.70
   4 -11  -4   13.30    6.10
   4 -11  -4   13.80    9.00
   5 -11  -4   -8.70    6.00
   5 -11  -4    1.70    3.90
   6 -11  -4   -2.20    3.40
   6 -11  -4   -6.50    5.20
   7 -11  -4    2.70    4.20
   7 -11  -4    2.20    8.10
   8 -11  -4   27.90   11.50
   8 -11  -4   40.70    8.10
   9 -11  -4    5.80    9.60
  10 -11  -4  -10.30    5.50
  -9 -12  -4   25.10   10.00
  -8 -12  -4   23.10    9.50
  -7 -12  -4    7.30    8.50
  -6 -12  -4   44.80   11.90
  -5 -12  -4   31.90    8.30
  -5 -12  -4   28.00    9.90
  -4 -12  -4   51.99   10.50
  -4 -12  -4   55.59   12.20
  -3 -12  -4   89.99   14.00
  -3 -12  -4   96.19   15.50
  -2 -12  -4   10.00    6.40
  -2 -12  -4    0.20    4.10
  -1 -12  -4  147.39   19.90
  -1 -12  -4  147.19   18.50
   0 -12  -4   46.80   11.70
   0 -12  -4   51.49   11.70
   1 -12  -4   70.79   15.00
   1 -12  -4   79.69   12.70
   2 -12  -4    2.30    4.30
   2 -12  -4    3.10    6.50
   3 -12  -4   20.80    9.10
   3 -12  -4   16.70    6.60
   4 -12  -4    3.00    4.00
   4 -12  -4   -5.80    6.50
   5 -12  -4    0.40    4.20
   5 -12  -4   -7.10    6.00
   6 -12  -4    8.80    8.30
   6 -12  -4   11.30    6.20
   7 -12  -4    7.40    8.80
   7 -12  -4   -1.50    4.60
   8 -12  -4    0.30    8.70
   9 -12  -4   -7.50    6.70
  -8 -13  -4   33.90   11.40
  -7 -13  -4   15.90    8.80
  -6 -13  -4    1.90    6.80
  -5 -13  -4    0.80    5.90
  -5 -13  -4    1.80    5.10
  -4 -13  -4    2.80    5.30
  -4 -13  -4    0.10    5.70
  -3 -13  -4    0.30    4.60
  -3 -13  -4    1.60    5.50
  -2 -13  -4    4.30    6.20
  -2 -13  -4    3.80    5.10
  -1 -13  -4    5.40    7.00
  -1 -13  -4    6.60    5.70
   0 -13  -4   86.99   17.60
   0 -13  -4   73.09   13.60
   1 -13  -4   11.00    7.10
   1 -13  -4    2.50    6.40
   2 -13  -4   35.60   11.50
   3 -13  -4   54.49   14.30
   3 -13  -4   62.69   11.30
   4 -13  -4   64.89   15.60
   4 -13  -4   75.09   12.00
   5 -13  -4   -3.50    7.70
   5 -13  -4    3.70    4.60
   6 -13  -4   18.20    6.40
   6 -13  -4   10.80    9.90
   7 -13  -4   11.00    5.60
   7 -13  -4    8.80    9.30
   8 -13  -4   -2.90    7.80
  -6 -14  -4    2.10    7.00
  -5 -14  -4   12.00    8.50
  -4 -14  -4    2.80    6.30
  -4 -14  -4    7.40    6.20
  -3 -14  -4   15.60    8.60
  -3 -14  -4    5.40    6.20
  -2 -14  -4    6.80    7.70
  -2 -14  -4   19.80    9.80
  -1 -14  -4   26.70   10.80
  -1 -14  -4   37.20   10.60
   0 -14  -4   -2.00    6.40
   0 -14  -4    3.10    6.00
   1 -14  -4   -2.80    6.00
   1 -14  -4    6.00    5.20
   2 -14  -4   11.20    8.90
   2 -14  -4   20.10    8.90
   3 -14  -4   18.60   11.10
   3 -14  -4   16.10    7.40
   4 -14  -4   14.10   10.10
   4 -14  -4   11.80    7.10
   5 -14  -4   99.09   14.50
   5 -14  -4   55.49   16.70
   6 -14  -4    1.90    5.90
   6 -14  -4   -1.10    8.80
   7 -14  -4    3.60    8.80
  -5 -15  -4    0.60    6.70
  -4 -15  -4    4.00    6.60
  -4 -15  -4   -6.90    5.90
  -3 -15  -4   -5.80    5.70
  -3 -15  -4    6.90    8.60
  -2 -15  -4   11.50    9.60
  -2 -15  -4   11.90    8.10
  -1 -15  -4   44.10   12.90
  -1 -15  -4   30.20   11.10
   0 -15  -4    1.90    7.60
   0 -15  -4   16.40    7.90
   1 -15  -4   18.40    9.60
   1 -15  -4   51.99   12.30
   2 -15  -4   -2.00    7.20
   2 -15  -4   -4.60    5.50
   3 -15  -4    5.00    6.40
   3 -15  -4    1.80    8.10
   4 -15  -4    0.80    7.90
   4 -15  -4   -4.20    5.60
   5 -15  -4    5.40    6.90
   5 -15  -4   -2.50    8.40
  -2 -16  -4    4.00    6.50
  -2 -16  -4    5.10    8.40
  -1 -16  -4   -3.70    7.50
  -1 -16  -4    1.80    6.80
   0 -16  -4   -3.60    6.30
   0 -16  -4   10.20   10.00
   1 -16  -4    8.40    7.70
   1 -16  -4    6.00    8.60
   2 -16  -4   -6.60    7.40
   2 -16  -4   -1.80    5.40
   3 -16  -4    7.70    7.20
   1 -16   5    0.20    6.90
   1 -16   5    0.70    6.30
   0 -16   5   14.20    8.30
   0 -16   5   13.40    8.50
  -1 -16   5    7.60    7.20
  -1 -16   5    3.10    6.10
  -2 -16   5   -0.80    6.10
  -2 -16   5   -1.50    4.90
   4 -15   5   20.40   10.30
   3 -15   5    3.30    7.10
   2 -15   5    9.00    7.70
   2 -15   5    1.30    5.60
   1 -15   5   14.90    7.50
   1 -15   5   11.80    8.00
   0 -15   5    8.90    7.00
   0 -15   5   -0.50    6.20
  -1 -15   5    2.40    5.90
  -1 -15   5   12.60    7.70
  -2 -15   5   -0.10    6.20
  -2 -15   5   -2.50    4.20
  -3 -15   5   43.70   11.70
  -3 -15   5   18.90    7.80
  -4 -15   5   -2.80    7.00
  -4 -15   5   -6.40    4.60
  -5 -15   5    1.70    8.40
   6 -14   5   13.60    8.30
   5 -14   5    4.90    6.90
   4 -14   5   -2.50    4.80
   3 -14   5   16.00    8.30
   2 -14   5   -3.30    5.40
   2 -14   5   -0.20    5.40
   1 -14   5   -4.00    4.90
   1 -14   5   -3.50    5.10
   0 -14   5   15.50    8.00
   0 -14   5   13.10    7.20
  -1 -14   5   27.60    8.70
  -1 -14   5   32.90   10.20
  -2 -14   5    8.20    5.20
  -2 -14   5   10.70    8.00
  -3 -14   5    7.20    7.10
  -3 -14   5    9.60    6.00
  -4 -14   5   -3.20    6.30
  -4 -14   5   -2.40    4.20
  -5 -14   5    2.90    7.30
  -6 -14   5    5.00    8.90
  -7 -14   5   -0.70    6.30
   7 -13   5   -3.80    6.00
   6 -13   5    5.50    7.10
   5 -13   5   29.40   11.10
   4 -13   5   -2.90    5.10
   3 -13   5   12.40    7.50
   3 -13   5   17.30    6.60
   2 -13   5   13.40    8.10
   2 -13   5   24.00    7.70
   1 -13   5   10.10    6.50
   1 -13   5   17.80    8.20
   0 -13   5   97.99   14.90
   0 -13   5   74.39   13.80
  -1 -13   5    2.50    5.50
  -1 -13   5    9.40    6.30
  -2 -13   5    1.80    3.70
  -2 -13   5    3.00    5.20
  -3 -13   5   21.30    9.20
  -3 -13   5    9.10    6.00
  -4 -13   5   13.10    8.60
  -4 -13   5    1.70    4.50
  -5 -13   5   -2.80    6.50
  -5 -13   5   -0.70    4.20
  -6 -13   5   12.30    7.90
  -7 -13   5   -0.90    7.10
  -8 -13   5   16.70    9.50
   9 -12   5    5.20    7.90
   8 -12   5   -5.40    5.40
   7 -12   5   -0.20    6.80
   6 -12   5   -3.90    4.60
   5 -12   5    3.60    6.30
   4 -12   5    9.90    4.80
   4 -12   5   10.00    6.80
   3 -12   5   11.00    6.90
   3 -12   5   22.40    6.80
   2 -12   5   -4.60    3.60
   2 -12   5    5.60    5.90
   1 -12   5   20.90    8.00
   1 -12   5   16.40    6.80
   0 -12   5   12.40    6.60
   0 -12   5   12.60    7.10
  -1 -12   5  165.88   18.90
  -1 -12   5  159.18   17.90
  -2 -12   5    1.50    3.40
  -2 -12   5   13.80    6.10
  -3 -12   5   -3.30    4.70
  -3 -12   5    3.40    5.00
  -4 -12   5   88.59   15.30
  -4 -12   5   98.69   12.50
  -5 -12   5   -2.30    3.80
  -5 -12   5   -0.90    5.70
  -6 -12   5   26.00   10.20
  -7 -12   5    2.50    6.10
  -8 -12   5   -5.50    5.60
  -9 -12   5   15.80    9.20
   9 -11   5   10.50    8.30
   8 -11   5   -1.80    5.20
   7 -11   5    2.80    6.50
   6 -11   5   13.00    8.20
   5 -11   5    1.80    4.80
   4 -11   5    0.60    3.10
   4 -11   5   -1.50    4.50
   3 -11   5   52.59   11.40
   3 -11   5   64.39    9.30
   2 -11   5   24.00    6.60
   2 -11   5   30.50    8.80
   1 -11   5  272.67   18.80
   1 -11   5  249.78   23.20
   0 -11   5   -3.20    3.80
   0 -11   5   -0.40    4.20
  -1 -11   5  138.69   16.00
  -1 -11   5   81.69   13.00
  -2 -11   5   66.89   12.40
  -3 -11   5   21.00    6.30
  -3 -11   5   28.50    9.00
  -4 -11   5   96.29   16.00
  -4 -11   5  106.69   11.90
  -5 -11   5   11.70    7.30
  -5 -11   5   19.80    5.50
  -6 -11   5   24.70   10.20
  -7 -11   5    9.80    7.20
  -8 -11   5   -0.40    6.80
  -9 -11   5   -2.70    7.00
 -10 -11   5   -5.70    5.80
  10 -10   5    8.40    7.90
   9 -10   5   -1.40    4.90
   8 -10   5    7.50    6.90
   7 -10   5   27.60   10.30
   6 -10   5    9.30    6.80
   5 -10   5   12.70    6.30
   5 -10   5   15.20    4.00
   4 -10   5   56.89   11.50
   4 -10   5   74.49    8.60
   3 -10   5    0.70    4.20
   3 -10   5    2.40    3.20
   2 -10   5    7.20    4.30
   2 -10   5    8.40    5.90
   1 -10   5   -1.70    3.20
   1 -10   5    3.90    4.60
   0 -10   5   89.69   13.30
   0 -10   5  119.89   14.00
  -1 -10   5   15.70    5.60
  -1 -10   5   15.90    6.20
  -2 -10   5  213.08   20.50
  -3 -10   5  360.16   21.10
  -3 -10   5  363.36   24.30
  -4 -10   5   98.39   11.10
  -4 -10   5   86.19   14.50
  -5 -10   5  119.59   11.30
  -5 -10   5  114.09   16.10
  -6 -10   5    8.50    7.30
  -6 -10   5   12.10    3.90
  -7 -10   5   -5.80    3.80
  -8 -10   5    1.50    5.40
  -9 -10   5    3.20    6.70
 -10 -10   5    9.90    9.20
 -11 -10   5    1.30    6.40
  11  10  -5    6.00    6.30
  11  -9   5    2.50    6.40
  10  -9   5    1.50    6.20
   9  -9   5   12.10    7.40
   8  -9   5   -1.60    4.90
   7  -9   5    4.20    5.90
   6  -9   5    0.00    4.30
   5  -9   5    8.90    5.70
   5  -9   5    3.90    2.50
   4  -9   5    9.50    5.40
   4  -9   5    4.90    2.80
   3  -9   5    0.40    4.30
   3  -9   5    1.00    2.50
   2  -9   5   22.20    5.40
   2  -9   5   20.00    6.60
   1  -9   5   26.30    7.30
   1  -9   5    9.50    4.70
   0  -9   5    6.50    3.90
   0  -9   5    1.90    3.80
  -1  -9   5  162.08   15.90
  -1  -9   5  162.88   16.00
  -2  -9   5   16.20    6.40
  -3  -9   5   27.30    8.30
  -3  -9   5   19.40    5.30
  -4  -9   5    5.70    4.90
  -4  -9   5    6.70    4.00
  -5  -9   5   11.10    4.10
  -5  -9   5   13.90    7.30
  -6  -9   5   26.60    4.50
  -6  -9   5   33.30    9.80
  -7  -9   5  147.49   19.60
  -8  -9   5    1.30    6.60
  -9  -9   5   17.70    8.60
   9   9  -5   36.00    9.20
 -10  -9   5    9.90    9.00
  10   9  -5    6.30    6.80
 -11  -9   5   -3.10    4.90
  11   9  -5    0.60    5.70
  11  -8   5    9.30    7.00
  10  -8   5    7.20    7.60
   9  -8   5   -1.60    5.20
   8  -8   5    4.70    6.20
   7  -8   5    0.00    5.30
   6  -8   5    6.20    5.60
   5  -8   5   72.59   12.40
   4  -8   5  166.18   17.40
   4  -8   5  150.68    9.20
   3  -8   5   63.99   11.10
   3  -8   5   72.19    7.60
   2  -8   5  120.99   10.90
   2  -8   5  111.99   13.90
   1  -8   5   14.30    4.40
   1  -8   5    9.10    4.30
   0  -8   5   -3.00    2.00
   0  -8   5    0.70    2.70
  -1  -8   5   23.80    5.90
  -1  -8   5   44.20    8.30
  -2  -8   5   29.70    6.70
  -3  -8   5   33.70    7.50
  -3  -8   5   29.30    5.70
  -4  -8   5   32.80    5.60
  -4  -8   5   21.90    7.30
  -5  -8   5   -2.60    3.60
  -5  -8   5   -2.10    1.80
  -6  -8   5    4.60    4.40
  -6  -8   5    1.20    2.10
  -7  -8   5   19.90    7.50
  -8  -8   5   43.20   11.30
   8   8  -5   43.80    9.30
  -9  -8   5   57.39   13.60
   9   8  -5   26.10    8.40
 -10  -8   5   11.20    7.30
  10   8  -5   13.20    7.30
 -11  -8   5   12.30    9.00
  11   8  -5   30.80    9.50
 -12  -8   5   28.00   12.00
  12   8  -5   36.30   10.90
  12  -7   5    3.40    6.20
  12  -7   5   -2.20    4.80
  11  -7   5   29.30    9.50
  10  -7   5    9.20    6.70
   9  -7   5   54.99   11.70
   8  -7   5   33.90    9.50
   7  -7   5  183.48   20.20
   6  -7   5    1.00    4.20
   5  -7   5   -4.00    3.40
   4  -7   5   11.70    2.60
   4  -7   5   15.30    5.80
  -4   7  -5   11.30    2.00
   3  -7   5  130.89   15.00
   3  -7   5  142.89    8.80
   2  -7   5   59.19    9.80
   2  -7   5   54.79    6.70
   1  -7   5   92.69    9.50
   1  -7   5   83.59   10.80
   0  -7   5    5.30    3.30
   0  -7   5    5.60    3.70
  -1  -7   5  730.83   33.30
  -1  -7   5  750.52   33.40
  -2  -7   5    0.40    2.10
  -2  -7   5   12.60    5.00
  -3  -7   5  250.47   14.10
  -3  -7   5  224.68   17.00
  -4  -7   5   67.59    7.30
  -4  -7   5   41.80    8.80
  -5  -7   5  241.88   12.70
  -5  -7   5  259.47   19.30
  -6  -7   5   32.90    4.50
  -6  -7   5   40.90    9.70
   6   7  -5   36.00    7.70
  -7  -7   5   16.00    7.30
   7   7  -5   12.30    6.10
  -8  -7   5   -0.30    5.80
   8   7  -5   -1.10    4.50
  -9  -7   5   23.20    8.60
   9   7  -5   23.20    8.20
 -10  -7   5   11.40    8.20
  10   7  -5   19.20    7.70
 -11  -7   5    0.10    5.80
  11   7  -5    6.90    6.90
 -12  -7   5    3.80    6.80
  12   7  -5    7.40    7.30
  12  -6   5   -4.50    5.10
  12  -6   5    2.20    5.80
  11  -6   5   -4.30    4.60
  11  -6   5   -4.30    4.20
  10  -6   5   -3.10    4.20
   9  -6   5   51.29   11.20
   8  -6   5   22.10    7.70
   7  -6   5  312.67   22.30
   6  -6   5  274.07   20.10
   5  -6   5   34.30    7.90
   4  -6   5  235.98   17.50
   3  -6   5  516.55   27.60
   3  -6   5  515.25   20.50
  -3   6  -5  538.35   19.80
   2  -6   5   -0.40    1.70
   2  -6   5   -1.50    2.30
   1  -6   5  105.79    9.40
   1  -6   5   91.49   10.50
   0  -6   5    8.80    3.50
   0  -6   5    7.90    3.40
  -1  -6   5  137.39   12.50
  -1  -6   5  162.58   11.20
  -2  -6   5  531.85   25.00
  -2  -6   5  433.16   21.60
  -3  -6   5   34.10    7.20
  -3  -6   5   34.60    5.20
  -4  -6   5   11.90    5.20
  -4  -6   5    1.00    2.00
  -5  -6   5    4.20    2.20
  -5  -6   5    4.20    3.80
   5   6  -5    1.00    3.20
  -6  -6   5   -0.40    4.10
  -6  -6   5    4.80    2.40
   6   6  -5    4.20    4.20
  -7  -6   5   -2.20    4.40
   7   6  -5   -1.40    4.10
  -8  -6   5   22.40    8.50
   8   6  -5   38.70    9.00
  -9  -6   5   -3.50    4.30
   9   6  -5   -2.40    4.40
 -10  -6   5    6.70    6.50
  10   6  -5   -1.00    4.90
 -11  -6   5   12.10    7.30
  11   6  -5   13.80    8.30
 -12  -6   5    4.60    6.80
  12   6  -5    2.90    7.30
 -13  -6   5    0.20    7.00
  13   6  -5    0.50    7.00
  13  -5   5   20.20   10.50
  12  -5   5   -1.20    5.50
  12  -5   5   16.60    8.90
  11  -5   5   20.50    8.00
  11  -5   5   15.00    6.90
  10  -5   5    4.60    6.40
  10  -5   5    0.00    4.40
   9  -5   5  246.58   19.10
   8  -5   5    8.00    6.00
   7  -5   5   51.69    9.40
   6  -5   5   59.39    9.80
   5  -5   5    7.40    4.20
   4  -5   5 1106.79   47.80
   3  -5   5   70.99    9.80
   3  -5   5   75.59    4.40
  -3   5  -5   70.89    3.90
   2  -5   5  166.38   12.70
   2  -5   5  171.98    9.00
  -2   5  -5  178.58    9.00
   1  -5   5   85.69    7.60
   1  -5   5   80.99    9.40
   0  -5   5    7.90    3.00
   0  -5   5   17.40    4.20
  -1  -5   5  273.97   14.90
  -1  -5   5  244.68   14.00
  -2  -5   5   54.39    6.30
  -2  -5   5   46.90    7.50
  -3  -5   5   80.59    7.30
  -3  -5   5   66.79    9.10
  -4  -5   5   19.10    5.80
  -4  -5   5   19.20    3.30
   4   5  -5   12.40    3.60
  -5  -5   5    5.20    2.30
  -5  -5   5    7.20    4.50
   5   5  -5   10.70    4.00
  -6  -5   5   74.79    6.20
  -6  -5   5   61.19   10.50
   6   5  -5   78.69    6.50
   6   5  -5   79.09   10.20
  -7  -5   5   22.20    7.40
   7   5  -5   32.80    7.50
  -8  -5   5    0.40    4.60
   8   5  -5   12.50    6.50
  -9  -5   5  122.39   16.40
   9   5  -5  132.69   15.60
 -10  -5   5   -2.60    4.60
  10   5  -5   -4.10    4.60
 -11  -5   5   59.79   13.50
  11   5  -5   52.69   11.70
 -12  -5   5    2.20    6.60
  12   5  -5   -3.60    5.20
 -13  -5   5   22.90    9.60
  13   5  -5   13.10    8.50
  13  -4   5    2.30    5.90
  13  -4   5    2.20    5.60
  12  -4   5   -7.40    3.90
  12  -4   5   -4.00    4.40
  11  -4   5    0.00    5.50
  11  -4   5    1.70    4.90
  10  -4   5   -2.10    3.80
  10  -4   5    0.60    5.50
   9  -4   5   -3.50    4.20
   9  -4   5    0.60    3.90
   8  -4   5    0.90    3.90
   7  -4   5  199.38   15.20
   6  -4   5    9.70    4.70
   5  -4   5    5.80    4.00
   4  -4   5  226.28   15.10
   3  -4   5  591.24   27.80
   2  -4   5  301.57   16.70
   2  -4   5  297.97   12.20
  -2   4  -5  283.17   12.20
   1  -4   5 2246.18   82.89
   1  -4   5 2227.68   77.69
   0  -4   5  280.77   14.00
   0  -4   5  294.97   15.10
  -1  -4   5    8.10    2.70
  -1  -4   5    7.70    3.00
  -2  -4   5    0.30    2.20
  -2  -4   5   -1.70    1.10
  -3  -4   5  204.18   13.30
  -3  -4   5  191.48   10.20
  -4  -4   5   48.20    5.30
  -4  -4   5   50.09    8.00
   4   4  -5   52.99    6.50
  -5  -4   5   35.00    4.50
  -5  -4   5   38.40    7.50
   5   4  -5   34.60    6.10
  -6  -4   5  146.69   15.20
  -6  -4   5  168.88    9.20
   6   4  -5  164.48   12.50
   6   4  -5  171.08    8.40
  -7  -4   5    4.40    5.00
   7   4  -5   15.00    5.40
  -8  -4   5   28.30    7.80
   8   4  -5   49.70    8.80
  -9  -4   5   51.19   10.60
   9   4  -5   62.59   11.10
 -10  -4   5   -3.40    4.60
  10   4  -5    5.20    6.00
 -11  -4   5    0.70    5.60
  11   4  -5    0.40    5.10
 -12  -4   5   18.60    8.20
  12   4  -5    9.20    6.70
 -13  -4   5   36.30   11.00
  13   4  -5   18.30    9.30
  13  -3   5    3.10    7.40
  12  -3   5    3.30    6.70
  12  -3   5    7.00    6.20
  11  -3   5   -2.90    4.20
  11  -3   5    0.80    5.80
  10  -3   5   31.90    7.70
  10  -3   5   17.00    7.60
   9  -3   5   -1.00    3.70
   9  -3   5    1.40    4.60
  -9   3  -5   -0.10    2.10
   8  -3   5    8.80    4.40
   8  -3   5    4.30    3.70
   8  -3   5    3.60    1.90
  -8   3  -5    2.10    1.70
   7  -3   5   85.49   10.40
   6  -3   5   61.69    8.60
   5  -3   5  111.79   11.40
   4  -3   5    4.50    2.90
   3  -3   5 1069.49   43.30
   2  -3   5  164.88   10.40
   2  -3   5  138.49    6.70
  -2   3  -5  151.58    6.90
   1  -3   5  321.47   13.60
   1  -3   5  321.97   16.00
  -1   3  -5  322.57   13.70
   0  -3   5  112.89    7.40
   0  -3   5  120.19    8.00
  -1  -3   5  136.79    8.30
  -1  -3   5  135.89    8.90
  -2  -3   5   40.30    4.60
  -3  -3   5  680.53   29.80
  -3  -3   5  685.73   27.20
   3   3  -5  674.23   27.00
  -4  -3   5  103.19    7.10
  -4  -3   5   93.49   10.10
   4   3  -5  102.09    7.80
  -5  -3   5   52.49    5.70
  -5  -3   5   66.39    9.50
   5   3  -5   57.19    7.30
  -6  -3   5   87.59   11.90
   6   3  -5   87.09    5.50
   6   3  -5   83.69    9.60
  -7  -3   5  125.19   14.40
   7   3  -5  107.49    6.00
   7   3  -5   87.69   10.80
  -8  -3   5   38.50    9.30
   8   3  -5   31.00    3.80
   8   3  -5   29.00    3.20
   8   3  -5   40.10    8.40
  -9  -3   5    4.00    5.10
   9   3  -5    4.50    5.00
 -10  -3   5   57.89   11.90
  10   3  -5   49.99   10.70
 -11  -3   5    0.10    5.10
  11   3  -5    7.00    6.80
 -12  -3   5    3.50    6.10
  12   3  -5   -4.80    5.90
 -13  -3   5    0.10    5.30
  13   3  -5    0.10    6.00
  14   3  -5    8.80    7.60
  13  -2   5   15.60    9.10
  12  -2   5   34.30   11.90
  12  -2   5   36.80    8.10
  11  -2   5    2.10    5.90
  11  -2   5    2.60    4.40
  10  -2   5   12.60    7.00
  10  -2   5    7.90    5.10
 -10   2  -5   13.20    4.40
   9  -2   5   57.49   11.40
   9  -2   5   45.30    8.30
  -9   2  -5   58.29    7.00
   8  -2   5    1.20    4.70
   8  -2   5    0.40    3.00
  -8   2  -5    2.60    2.30
   7  -2   5   57.39    9.70
   7  -2   5   66.99    8.90
  -7   2  -5   75.99    6.60
   6  -2   5   28.90    6.80
   6  -2   5   34.10    3.40
   6  -2   5   31.10    5.80
  -6   2  -5   28.90    3.70
   5  -2   5   58.29    3.50
   5  -2   5   57.69    7.40
  -5   2  -5   57.39    4.10
   4  -2   5  645.54   27.70
   4  -2   5  631.34   21.80
  -4   2  -5  611.74   22.30
   3  -2   5  594.54   25.70
  -3   2  -5  593.34   20.70
  -3   2  -5  579.04   20.90
   2  -2   5   32.50    4.70
  -2   2  -5   35.50    2.50
   1  -2   5  114.49    7.80
   1  -2   5  116.19    6.40
  -1   2  -5  115.79    6.50
   0  -2   5    3.60    1.80
   0  -2   5    9.70    2.50
  -1  -2   5   55.59    5.80
  -1  -2   5   55.59    5.30
  -2  -2   5   13.40    3.40
  -2  -2   5   12.80    2.40
  -3  -2   5  368.36   18.30
  -3  -2   5  363.96   16.40
   3   2  -5  360.86   15.60
  -4  -2   5   47.60    5.40
  -4  -2   5   41.70    7.00
   4   2  -5   43.00    5.40
  -5  -2   5   83.79   10.50
   5   2  -5   81.99    8.40
  -6  -2   5   13.70    4.90
   6   2  -5   15.40    4.60
  -7  -2   5   39.90    8.50
   7   2  -5   70.59    9.30
  -8  -2   5  111.69   13.80
   8   2  -5  119.49   13.50
  -9  -2   5   22.00    7.30
   9   2  -5   37.60    9.40
   9   2  -5   34.30    5.30
 -10  -2   5   56.09   11.50
  10   2  -5   64.79    6.90
  10   2  -5   61.99   12.10
 -11  -2   5   38.30    9.70
  11   2  -5   26.00    8.90
 -12  -2   5    0.60    5.60
  12   2  -5   -5.20    4.70
 -13  -2   5    7.00    6.40
  13   2  -5    5.60    7.70
  14   2  -5   -1.60    7.30
  13  -1   5    1.50    7.70
  12  -1   5   16.10    8.80
  11  -1   5  121.09   12.60
  11  -1   5  106.19   16.90
  10  -1   5   20.30    7.80
  10  -1   5   13.20    5.40
 -10   1  -5    6.90    4.00
   9  -1   5   80.49   13.20
   9  -1   5   73.89    9.60
  -9   1  -5   85.59    9.50
   8  -1   5   16.40    5.80
   8  -1   5    2.90    3.30
  -8   1  -5   13.10    3.80
   7  -1   5   26.00    5.50
   7  -1   5   24.40    6.30
  -7   1  -5   35.20    5.40
   6  -1   5    4.70    3.00
   6  -1   5    1.50    3.00
  -6   1  -5    2.00    2.00
   5  -1   5   51.09    6.90
   5  -1   5   55.99    8.20
  -5   1  -5   56.09    5.60
   4  -1   5   25.90    2.80
   4  -1   5   16.40    3.90
   4  -1   5   17.10    4.10
  -4   1  -5   18.80    3.00
   3  -1   5    1.50    1.80
   3  -1   5   -2.20    1.20
   3  -1   5   -0.30    0.90
  -3   1  -5    0.50    1.10
   2  -1   5  135.49    8.50
  -2   1  -5  135.89    6.80
  -2   1  -5  138.59    6.30
   1  -1   5  560.14   21.50
   1  -1   5  572.44   23.70
  -1   1  -5  589.14   22.00
   0  -1   5 1373.46   50.59
   0  -1   5 1351.36   48.70
  -1  -1   5 5066.09  170.18
  -1  -1   5 4974.10  174.88
  -1  -1   5 4984.70  169.98
  -2  -1   5  471.85   17.60
  -2  -1   5  472.95   20.80
  -2  -1   5  456.65   20.30
   2   1  -5  479.65   17.60
  -3  -1   5  410.56   18.30
  -3  -1   5  394.46   19.20
  -3  -1   5  397.46   16.40
   3   1  -5  400.66   16.70
  -4  -1   5  287.37   14.70
  -4  -1   5  280.77   16.00
   4   1  -5  296.17   14.10
  -5  -1   5 1271.77   49.40
   5   1  -5 1191.88   47.50
  -6  -1   5  379.36   20.50
   6   1  -5  327.07   18.30
  -7  -1   5  208.68   15.70
   7   1  -5  248.38   15.80
  -8  -1   5    0.20    3.70
   8   1  -5    6.50    4.70
  -9  -1   5  354.16   22.70
   9   1  -5  377.36   23.40
   9   1  -5  346.47   18.90
 -10  -1   5  109.59   14.90
  10   1  -5  119.59   11.10
  10   1  -5  120.69   15.60
 -11  -1   5   96.29   14.90
  11   1  -5   89.89   14.90
 -12  -1   5    0.30    5.20
  12   1  -5   -3.50    5.60
 -13  -1   5    3.30    6.30
  13   1  -5   22.80    9.90
 -14  -1   5   -0.10    5.40
  14   1  -5   -3.20    7.00
  13   0   5   14.90    8.90
  12   0   5   -1.30    6.70
  11   0   5    3.10    3.80
  11   0   5   10.00    7.70
 -11   0  -5    5.10    4.70
  10   0   5    0.50    4.70
  10   0   5   -1.70    2.60
 -10   0  -5   -2.60    3.40
   9   0   5   96.29   14.50
   9   0   5  145.59   12.50
  -9   0  -5  151.88   14.00
   8   0   5    0.90    3.60
   8   0   5   -0.10    2.40
  -8   0  -5   -0.40    2.70
   7   0   5   85.29    9.00
   7   0   5   99.99   13.20
  -7   0  -5  104.39   10.10
   6   0   5   -1.60    2.60
   6   0   5   -1.10    1.80
  -6   0  -5   -0.10    1.90
   5   0   5    4.50    2.40
   5   0   5    2.80    2.90
  -5   0  -5    1.60    1.80
   4   0   5    0.70    2.00
   4   0   5   -0.60    1.20
  -4   0  -5    0.60    1.40
   3   0   5  203.38   11.70
   3   0   5  201.58   11.00
  -3   0  -5  208.58    9.80
   2   0   5    0.60    1.50
   2   0   5    0.90    1.30
  -2   0  -5    0.20    1.00
   1   0   5  405.86   17.00
   1   0   5  447.66   18.90
  -1   0  -5  438.56   18.00
  -1   0  -5  397.66   16.80
   0   0   5   -2.90    1.80
   0   0   5   -1.80    1.50
   0   0   5   -1.80    0.90
   0   0  -5   -0.90    0.90
  -1   0   5    1.70    2.10
  -1   0   5    2.90    2.10
  -2   0   5    2.60    2.30
  -2   0   5   -1.60    1.70
   2   0  -5   -0.30    0.80
  -3   0   5  491.95   21.70
   3   0  -5  457.85   18.80
  -4   0   5   -2.30    1.90
   4   0  -5   -0.60    1.50
  -5   0   5 1048.10   42.20
   5   0  -5 1002.60   40.30
  -6   0   5    2.10    3.40
   6   0  -5    2.50    2.70
  -7   0   5  407.26   22.80
   7   0  -5  422.16   22.30
  -8   0   5   -1.90    2.90
   8   0  -5   -2.90    2.70
  -9   0   5   43.10    9.00
   9   0  -5   68.89    9.40
   9   0  -5   53.69   10.10
 -10   0   5    0.30    4.50
  10   0  -5    0.90    3.70
  10   0  -5   -7.90    4.60
 -11   0   5   59.29   11.00
  11   0  -5   69.99   13.20
  11   0  -5   73.29    9.90
 -12   0   5    3.30    4.50
  12   0  -5   -3.20    4.30
 -13   0   5   40.50   10.30
  13   0  -5   70.39   14.40
 -14   0   5    2.80    5.50
  14   0  -5   -2.00    6.60
  13   1   5    4.40    7.50
  12   1   5   -0.60    5.90
 -12  -1  -5   10.50    6.00
  11   1   5  120.39   18.80
 -11  -1  -5  126.69   14.70
  10   1   5    6.30    3.90
  10   1   5   12.90    7.20
 -10  -1  -5    9.40    5.50
   9   1   5   82.89   13.60
   9   1   5   80.39    9.20
  -9  -1  -5   92.99   11.70
   8   1   5   17.20    6.80
   8   1   5    9.80    3.70
  -8  -1  -5   19.80    5.30
   7   1   5   21.80    4.40
   7   1   5   28.70    7.10
  -7  -1  -5   37.00    6.60
   6   1   5    5.00    2.70
   6   1   5    2.80    3.60
  -6  -1  -5    2.00    2.40
   5   1   5   46.80    5.90
   5   1   5   61.09    8.40
  -5  -1  -5   48.90    6.70
   4   1   5   16.90    4.40
   4   1   5   18.30    3.70
  -4  -1  -5   18.50    3.70
   3   1   5    3.30    2.00
   3   1   5    1.50    2.00
  -3  -1  -5    0.10    1.10
   2   1   5  130.59    8.50
   2   1   5  126.49    8.20
   1   1   5  553.34   24.20
   1   1   5  579.34   22.60
  -1  -1  -5  565.54   22.60
  -1  -1  -5  594.44   22.10
   0   1   5 1328.07   47.70
   0   1   5 1351.86   51.39
   0  -1  -5 1367.36   47.80
   0  -1  -5 1364.56   47.90
  -1   1   5 5038.40  175.48
  -1   1   5 4928.41  169.18
  -2   1   5  471.35   20.70
  -2   1   5  495.05   22.30
  -3   1   5  404.86   19.20
  -4   1   5  285.77   15.70
  -5   1   5 1209.98   48.10
  -6   1   5  360.56   20.20
   6  -1  -5  380.16   19.40
  -7   1   5  221.98   15.70
   7  -1  -5  252.77   15.90
  -8   1   5    0.20    3.40
   8  -1  -5   -1.20    2.90
  -9   1   5  341.57   22.20
   9  -1  -5  383.96   23.40
   9  -1  -5  390.26   22.80
 -10   1   5  118.89   15.00
  10  -1  -5  152.98   17.80
  10  -1  -5   97.79   12.60
 -11   1   5   51.99   10.40
  11  -1  -5  100.79   15.70
  11  -1  -5  113.89   13.50
 -12   1   5   -1.90    3.40
  12  -1  -5    2.30    5.60
 -13   1   5    6.90    6.20
  13  -1  -5    8.50    8.30
 -14   1   5    1.40    5.90
  14  -1  -5    0.20    8.00
  13   2   5   -6.20    7.30
  12   2   5   48.50   12.60
 -12  -2  -5   46.80   10.10
  11   2   5   -5.70    5.10
 -11  -2  -5   -4.70    4.60
  10   2   5    8.50    7.90
  10   2   5   16.20    5.10
 -10  -2  -5    9.90    5.50
   9   2   5   49.00   11.10
   9   2   5   69.39    8.40
  -9  -2  -5   60.49   10.10
   8   2   5   -2.00    2.50
   8   2   5    3.90    5.00
  -8  -2  -5    1.30    3.30
   7   2   5   77.59   11.50
   7   2   5   75.69    8.20
  -7  -2  -5   72.99    9.90
   6   2   5   26.90    5.00
   6   2   5   23.40    6.60
  -6  -2  -5   25.90    5.50
   5   2   5   54.49    6.40
   5   2   5   48.80    8.20
   4   2   5  546.85   24.00
   4   2   5  582.44   26.30
   3   2   5  595.04   25.30
   3   2   5  591.14   26.10
  -3  -2  -5  584.04   24.50
   2   2   5   37.80    5.30
   2   2   5   44.00    5.60
  -2  -2  -5   34.00    4.50
   1   2   5  119.09    8.90
  -1  -2  -5  129.39    7.50
   0   2   5    1.90    2.60
   0  -2  -5   10.60    2.60
  -1   2   5   58.49    7.20
   1  -2  -5   59.99    5.60
  -2   2   5   16.90    3.60
  -3   2   5  397.96   18.70
  -4   2   5   41.50    6.50
  -5   2   5  101.79   10.60
  -6   2   5   18.20    5.00
  -7   2   5   59.19    8.90
  -8   2   5  157.08   15.40
   8  -2  -5  143.69   14.90
  -9   2   5   19.60    6.00
   9  -2  -5   37.40    8.40
   9  -2  -5   33.50    8.10
  10  -2  -5   42.70    9.50
  10  -2  -5   74.39   11.90
 -11   2   5   49.00    9.90
  11  -2  -5   37.50    9.30
  11  -2  -5   22.50    7.80
 -12   2   5    7.50    5.20
  12  -2  -5   -3.50    5.20
  12  -2  -5   -2.00    5.00
 -13   2   5    2.20    5.80
  13  -2  -5   10.70    7.90
  14  -2  -5   -1.00    7.20
  13   3   5   -1.20    6.50
 -13  -3  -5   -2.10    5.60
  12   3   5    5.30    6.10
 -12  -3  -5   14.90    8.00
  11   3   5   -0.30    5.40
 -11  -3  -5    0.90    4.70
  10   3   5   30.50    9.80
 -10  -3  -5   34.60    8.90
   9   3   5   -2.40    3.00
   9   3   5    7.30    6.70
  -9  -3  -5   -2.50    3.30
   8   3   5    0.30    4.80
   8   3   5    4.50    3.20
  -8  -3  -5    1.60    2.40
   7   3   5   99.99   13.20
   7   3   5   88.79    8.90
  -7  -3  -5   61.69    9.90
   6   3   5   50.59    8.90
   6   3   5   57.79    7.10
  -6  -3  -5   55.09    8.80
   5   3   5  120.69   12.60
   5   3   5  112.69    9.80
  -5  -3  -5  104.79   10.90
   4   3   5    4.90    3.40
   4   3   5   -0.30    2.10
  -4  -3  -5    1.80    2.40
   3   3   5 1002.80   41.60
   3   3   5 1064.99   42.30
  -3  -3  -5 1090.59   41.30
   2   3   5  154.88   10.00
   2   3   5  150.78   10.50
  -2  -3  -5  159.18    9.90
   1   3   5  327.27   15.30
   1   3   5  329.87   17.20
  -1  -3  -5  318.47   15.30
   0  -3  -5  106.79    7.10
   1  -3  -5  130.69    7.90
   2  -3  -5  104.79    7.00
  -3   3   5  697.83   28.90
  -4   3   5  122.19   10.80
  -5   3   5   69.29    8.60
  -6   3   5   92.09   10.20
  -7   3   5  128.19   13.00
  -8   3   5    1.30    2.00
  -9   3   5   -0.90    3.80
   9  -3  -5    4.60    4.80
   9  -3  -5   -0.90    4.40
 -10   3   5   35.70    8.10
  10  -3  -5   64.89   11.50
  10  -3  -5   61.59   12.00
 -11   3   5    6.10    5.00
  11  -3  -5    5.40    6.00
  11  -3  -5    3.40    5.20
 -12   3   5   10.40    5.80
  12  -3  -5    6.10    6.30
  12  -3  -5    1.60    5.10
 -13   3   5    8.70    5.60
  13  -3  -5   -1.40    5.90
  14  -3  -5    2.50    7.70
  13   4   5    8.40    8.80
 -13  -4  -5   10.70    8.40
  12   4   5   -3.20    6.30
 -12  -4  -5   -6.00    4.70
  11   4   5    1.60    6.30
 -11  -4  -5   -5.20    4.60
  10   4   5   -1.50    5.00
 -10  -4  -5   -0.90    3.30
   9   4   5   -3.00    2.80
   9   4   5    2.90    5.70
  -9  -4  -5    0.90    4.40
   8   4   5   -0.20    3.20
   8   4   5    9.40    5.70
  -8  -4  -5    5.90    4.90
   7   4   5  163.98   11.20
   7   4   5  147.99   16.50
  -7  -4  -5  159.28   16.30
   6   4   5   12.20    5.30
   6   4   5   13.70    4.20
  -6  -4  -5   19.40    5.90
   5   4   5    4.50    3.00
   5   4   5    3.80    3.80
  -5  -4  -5    7.70    3.70
   4   4   5  220.38   13.60
   4   4   5  225.98   14.80
  -4  -4  -5  235.78   14.90
   3   4   5  498.95   23.70
   3   4   5  534.45   24.40
  -3  -4  -5  479.05   23.30
   2   4   5  337.07   16.80
  -2  -4  -5  300.27   16.20
  -1  -4  -5 2314.87   82.69
   0  -4  -5  260.57   13.30
   1  -4  -5    6.90    2.40
   2  -4  -5    1.30    1.70
   3  -4  -5  197.68   11.00
   4  -4  -5   57.89    6.70
  -5   4   5   43.00    6.70
  -6   4   5  192.68   12.80
  -7   4   5    0.00    1.50
  -8   4   5   56.39    8.60
  -9   4   5   43.30    8.10
   9  -4  -5   72.79   13.10
 -10   4   5    3.90    4.60
  10  -4  -5    7.70    6.00
 -11   4   5   -2.30    3.60
  11  -4  -5    2.10    5.20
  11  -4  -5   -8.60    4.10
 -12   4   5    6.40    5.60
  12  -4  -5    9.90    7.40
  12  -4  -5   18.10    7.80
 -13   4   5   10.70    6.60
  13  -4  -5   23.30    8.70
  13  -4  -5   10.90    7.10
  13   5   5    8.90    7.80
  12   5   5   13.00    9.00
 -12  -5  -5   14.70    7.00
  11   5   5   16.00    8.30
 -11  -5  -5   13.40    8.40
  10   5   5   12.80    8.00
 -10  -5  -5    2.50    5.20
   9   5   5  216.38   22.70
  -9  -5  -5  224.48   22.10
   8   5   5   17.30    7.60
  -8  -5  -5    7.40    5.80
   7   5   5   36.20    8.80
  -7  -5  -5   26.90    7.70
   6   5   5   34.90    8.20
  -6  -5  -5   66.39   10.50
   5   5   5    6.10    4.20
  -5  -5  -5    8.50    4.00
   4   5   5 1070.69   45.40
  -4  -5  -5 1071.19   45.10
   3   5   5   73.89    9.40
  -3  -5  -5   82.99    9.60
  -2  -5  -5  162.88   11.60
  -1  -5  -5   65.39    8.00
   0  -5  -5   15.60    4.00
   1  -5  -5  235.98   13.00
   2  -5  -5   62.59    7.20
   3  -5  -5   84.69    8.30
   4  -5  -5   14.70    3.70
   5  -5  -5    8.40    3.10
   6  -5  -5   73.79    8.00
  -7   5   5   41.60    7.10
  -8   5   5    9.70    4.40
   8  -5  -5    4.00    5.70
  -9   5   5  131.69   13.30
   9  -5  -5  158.98   19.70
 -10   5   5   -1.50    3.40
  10  -5  -5   -4.80    4.30
 -11   5   5   70.69   11.00
  11  -5  -5   75.99   14.80
 -12   5   5   -2.90    3.70
  12  -5  -5    3.30    6.50
  12  -5  -5    4.20    6.00
  13  -5  -5   14.10    7.60
  13  -5  -5   19.40    9.60
  12   6   5    8.90    7.90
 -12  -6  -5    7.00    8.00
  11   6   5   16.30    8.40
 -11  -6  -5    4.20    6.00
  10   6   5   -7.30    5.20
 -10  -6  -5   -1.80    4.80
   9   6   5   44.50   10.80
  -9  -6  -5   33.30    9.30
   8   6   5   22.00    8.30
  -8  -6  -5   11.50    6.60
   7   6   5  275.97   20.70
  -7  -6  -5  306.17   21.40
   6   6   5  195.58   18.90
  -6  -6  -5  191.28   19.10
   5   6   5   24.90    6.60
  -5  -6  -5   30.30    7.00
   4   6   5  226.68   16.00
  -4  -6  -5  263.17   17.20
   3   6   5  491.75   24.50
  -3  -6  -5  478.75   24.90
  -2  -6  -5    3.40    2.90
  -1  -6  -5   93.39   10.30
   0  -6  -5   17.60    4.80
   1  -6  -5  147.89   10.70
   2  -6  -5  495.85   22.70
   3  -6  -5   32.80    5.40
   4  -6  -5    8.10    3.10
   5  -6  -5    4.80    2.90
   6  -6  -5    6.60    3.30
   7  -6  -5   -0.70    2.60
   8  -6  -5   36.50   10.70
   8  -6  -5   46.40    7.30
   9  -6  -5    1.60    3.50
   9  -6  -5  -10.20    3.70
  10  -6  -5    3.80    4.20
  10  -6  -5   10.40    8.00
  11  -6  -5    7.00    4.80
  11  -6  -5   10.80    7.80
  12  -6  -5    3.70    7.00
  12  -6  -5    2.00    5.30
  12  -6  -5   -6.40    3.70
  13  -6  -5   -4.40    6.40
  13  -6  -5    5.40    7.60
  12   7   5   -4.50    5.50
 -12  -7  -5   -6.80    5.50
  11   7   5   41.40   12.20
 -11  -7  -5   20.10    9.20
  10   7   5    0.00    5.90
 -10  -7  -5    2.90    6.10
   9   7   5   54.29   12.20
  -9  -7  -5   55.89   12.20
   8   7   5   23.80    8.40
  -8  -7  -5   37.90   10.40
   7   7   5  168.98   18.70
  -7  -7  -5  166.68   19.30
   6   7   5   -0.10    4.00
  -6  -7  -5    6.80    5.20
   5   7   5    0.20    3.40
  -5  -7  -5   -1.10    3.20
   4   7   5    5.30    4.30
  -4  -7  -5    3.00    4.00
  -2  -7  -5   38.10    7.50
  -1  -7  -5   59.29    8.70
   0  -7  -5    5.60    3.80
   1  -7  -5  754.42   32.90
   2  -7  -5   18.80    4.60
   3  -7  -5  233.18   14.00
   4  -7  -5   55.59    7.60
   5  -7  -5  256.07   14.80
   6  -7  -5   38.60    6.30
   7  -7  -5   14.60    8.40
   7  -7  -5   12.90    4.40
   8  -7  -5    2.30    6.60
   8  -7  -5    4.90    3.70
   9  -7  -5   54.09   13.40
   9  -7  -5   25.50    5.80
  10  -7  -5   14.80    5.20
  10  -7  -5   11.80    7.00
  11  -7  -5    9.10    4.90
  11  -7  -5   -0.70    6.70
  12  -7  -5    1.70    6.40
  11   8   5   17.60    8.90
 -11  -8  -5   23.50    9.50
  10   8   5   -2.30    5.70
 -10  -8  -5   12.00    7.70
   9   8   5    9.00    7.00
  -9  -8  -5   -7.60    3.50
   8   8   5   -3.00    5.50
  -8  -8  -5    3.90    6.10
   7   8   5    6.00    5.70
  -7  -8  -5    0.70    5.20
   6   8   5    3.20    5.80
  -6  -8  -5    4.40    5.90
   5   8   5   52.39   10.10
  -5  -8  -5   64.99   11.90
  -3  -8  -5   72.79   11.40
  -2  -8  -5  107.29   12.80
  -1  -8  -5   15.00    5.20
   0  -8  -5    3.50    3.60
   1  -8  -5   25.80    6.40
   2  -8  -5   38.60    7.00
   3  -8  -5   30.60    6.10
   4  -8  -5   33.80    6.20
   5  -8  -5   -1.40    2.60
   6  -8  -5   -3.80    2.50
   7  -8  -5   57.79   13.40
   7  -8  -5   29.30    6.20
   8  -8  -5   32.00    6.50
   8  -8  -5   32.90   11.50
   9  -8  -5   27.60    6.40
   9  -8  -5   54.39   14.70
  10  -8  -5   23.70    6.10
  10  -8  -5   32.30   12.20
  11  -8  -5   21.60   10.40
  12  -8  -5   44.30   13.30
  11   9   5    0.90    6.40
 -11  -9  -5   -3.50    5.30
  10   9   5   -2.70    4.90
 -10  -9  -5    8.50    6.80
   9   9   5   22.00    9.00
  -9  -9  -5   13.20    8.20
   8   9   5   -6.20    4.00
  -8  -9  -5    6.20    7.10
   7   9   5    0.80    4.80
  -7  -9  -5    4.80    5.20
   6   9   5   -1.30    4.40
  -6  -9  -5   -6.00    4.20
  -5  -9  -5    3.10    5.60
  -4  -9  -5    2.90    4.40
  -3  -9  -5   -0.70    4.00
  -2  -9  -5   27.10    7.10
  -1  -9  -5   19.40    6.10
   0  -9  -5   -0.80    3.40
   1  -9  -5  134.29   14.40
   2  -9  -5   17.80    5.50
   3  -9  -5   19.10    5.30
   4  -9  -5    3.30    3.40
   5  -9  -5   19.00    5.30
   6  -9  -5   18.40    9.20
   6  -9  -5   24.70    6.00
   7  -9  -5  129.69   20.90
   7  -9  -5  155.98   13.80
   8  -9  -5    5.70    7.20
   8  -9  -5    2.00    4.20
   9  -9  -5   40.90    7.60
   9  -9  -5   30.90   12.10
  10  -9  -5    3.80    4.20
  10  -9  -5    5.70    7.70
  11  -9  -5   -2.30    6.30
  10  10   5    6.40    7.10
 -10 -10  -5    9.80    7.10
   9  10   5    0.10    5.90
  -9 -10  -5    3.30    6.70
   8  10   5   -0.90    4.70
  -8 -10  -5   -3.20    5.70
  -7 -10  -5   15.60    8.40
  -6 -10  -5    5.50    5.10
  -5 -10  -5   11.20    7.00
  -4 -10  -5   56.69   11.00
  -3 -10  -5    1.10    4.20
  -2 -10  -5    5.10    5.50
  -1 -10  -5    0.10    3.30
   0 -10  -5  104.19   13.10
   1 -10  -5    9.50    5.40
   2 -10  -5  221.58   16.60
   3 -10  -5  402.46   23.50
   4 -10  -5   93.69   11.50
   5 -10  -5  130.59   20.50
   5 -10  -5  132.19   13.80
   6 -10  -5   18.80    6.20
   6 -10  -5   19.00    9.60
   7 -10  -5   14.80   10.20
   7 -10  -5    8.10    4.70
   8 -10  -5   -0.90    7.80
   8 -10  -5    0.40    3.70
   9 -10  -5    3.20    4.00
   9 -10  -5    3.10    8.20
  10 -10  -5   13.40    8.70
  11 -10  -5    0.50    8.00
  -9 -11  -5   14.00    7.70
  -8 -11  -5    2.20    6.60
  -7 -11  -5   21.80    9.20
  -6 -11  -5   11.80    5.50
  -6 -11  -5    2.90    5.80
  -5 -11  -5    0.70    5.30
  -4 -11  -5   -4.20    4.50
  -3 -11  -5   40.40   10.10
  -2 -11  -5   29.50    8.60
  -1 -11  -5  289.87   21.50
   0 -11  -5   -0.60    3.70
   1 -11  -5   73.79   11.40
   2 -11  -5   58.39   10.40
   3 -11  -5   24.20    9.50
   3 -11  -5   19.80    6.90
   4 -11  -5  100.39   18.40
   4 -11  -5   82.29   11.70
   5 -11  -5    8.10    7.30
   5 -11  -5   10.80    5.40
   6 -11  -5   43.00   12.90
   6 -11  -5   38.20    8.10
   7 -11  -5    6.70    8.20
   7 -11  -5   -5.10    3.70
   8 -11  -5    9.70    8.60
   8 -11  -5   19.80    6.80
   9 -11  -5   10.10    5.40
   9 -11  -5    4.80    9.60
  10 -11  -5   -4.80    7.70
  -9 -12  -5   -4.80    6.10
  -8 -12  -5   -0.10    5.60
  -7 -12  -5    4.40    7.70
  -6 -12  -5    2.70    6.60
  -5 -12  -5    2.30    4.60
  -5 -12  -5   -6.80    4.50
  -4 -12  -5    2.20    5.00
  -4 -12  -5    8.90    6.90
  -3 -12  -5   20.80    7.60
  -3 -12  -5   21.10    8.30
  -2 -12  -5   -2.90    4.50
  -2 -12  -5   -2.40    4.40
  -1 -12  -5    4.50    6.20
   0 -12  -5    8.80    6.00
   0 -12  -5   10.70    7.40
   1 -12  -5  108.49   17.80
   1 -12  -5  141.49   17.00
   2 -12  -5    5.10    6.50
   2 -12  -5    8.50    5.70
   3 -12  -5    8.90    8.20
   3 -12  -5    8.40    5.10
   4 -12  -5  107.69   19.60
   4 -12  -5   85.79   12.70
   5 -12  -5   -6.60    6.40
   5 -12  -5    3.80    5.20
   6 -12  -5   29.90   12.70
   6 -12  -5   27.70    8.00
   7 -12  -5   -2.40    4.50
   7 -12  -5    4.50    8.40
   8 -12  -5   -4.20    7.20
   8 -12  -5    1.20    4.70
   9 -12  -5   10.20   10.60
  -8 -13  -5   16.10    9.90
  -7 -13  -5    4.00    7.90
  -6 -13  -5    5.40    7.20
  -5 -13  -5    8.20    6.40
  -5 -13  -5    9.30    6.60
  -4 -13  -5    4.00    6.10
  -4 -13  -5    1.50    5.10
  -3 -13  -5   20.80    8.60
  -3 -13  -5    7.50    6.90
  -2 -13  -5    7.40    6.30
  -2 -13  -5   11.50    7.80
  -1 -13  -5    6.50    6.60
  -1 -13  -5    0.60    5.50
   0 -13  -5   58.29   13.90
   0 -13  -5   54.09   11.90
   1 -13  -5   13.20    8.50
   1 -13  -5    0.00    4.70
   2 -13  -5   11.00    8.50
   2 -13  -5   -5.90    3.90
   3 -13  -5   11.30    8.70
   3 -13  -5   19.50    7.50
   4 -13  -5    2.20    7.40
   4 -13  -5    7.40    5.30
   5 -13  -5   13.00   10.00
   5 -13  -5    3.90    4.90
   6 -13  -5    4.00    5.50
   6 -13  -5   21.90   11.80
   7 -13  -5    2.70    9.20
   7 -13  -5   14.50    7.00
   8 -13  -5    3.90    8.60
  -6 -14  -5   -0.70    7.00
  -5 -14  -5   -7.40    5.90
  -4 -14  -5    2.60    6.10
  -4 -14  -5   -0.20    5.40
  -3 -14  -5    6.00    7.20
  -3 -14  -5   13.30    8.30
  -2 -14  -5    3.00    6.10
  -2 -14  -5    1.70    6.60
  -1 -14  -5    1.60    5.30
  -1 -14  -5   -0.90    6.40
   0 -14  -5   15.40    9.80
   0 -14  -5   -1.20    5.50
   1 -14  -5   42.80   13.40
   1 -14  -5   44.70   11.50
   2 -14  -5   16.10    9.70
   2 -14  -5   21.40    8.40
   3 -14  -5   -1.40    7.90
   3 -14  -5   -4.40    4.50
   4 -14  -5   -1.00    7.50
   4 -14  -5    1.40    5.20
   5 -14  -5    7.10    5.80
   5 -14  -5   -1.60    7.30
   6 -14  -5    6.90    5.80
   6 -14  -5    4.60   10.30
   7 -14  -5   -2.10    7.50
   7 -14  -5    4.80    5.70
  -4 -15  -5   -1.70    7.20
  -4 -15  -5    9.00    7.50
  -3 -15  -5    6.80    7.70
  -3 -15  -5   -1.00    7.10
  -2 -15  -5   -0.80    6.70
  -2 -15  -5   -2.70    6.80
  -1 -15  -5    2.90    7.70
  -1 -15  -5   13.00    8.00
   0 -15  -5    1.30    6.40
   0 -15  -5   -3.20    6.10
   1 -15  -5   -7.90    6.20
   1 -15  -5    7.70    6.70
   2 -15  -5    5.60    7.20
   2 -15  -5   15.20   10.30
   3 -15  -5   12.10    7.80
   3 -15  -5   39.20   13.60
   4 -15  -5   -4.20    6.90
   4 -15  -5    5.10    6.00
   5 -15  -5    1.40    5.80
   5 -15  -5   -0.50    7.90
  -2 -16  -5    3.40    7.70
  -1 -16  -5   -4.10    7.40
  -1 -16  -5   -7.20    6.00
   0 -16  -5    8.10    7.30
   0 -16  -5   11.70   10.00
   1 -16  -5   -1.50    5.90
   1 -16  -5    7.80    9.40
   2 -16  -5   -1.10    7.80
   2 -16  -5   -0.90    6.00
   4 -15   6   -2.50    5.80
   3 -15   6   16.50    8.30
   2 -15   6   14.40    8.40
   1 -15   6   35.20   10.90
   1 -15   6   57.89   12.50
   0 -15   6   -0.50    6.20
   0 -15   6   11.60    7.80
  -1 -15   6    8.00    7.40
  -1 -15   6    5.80    6.90
  -2 -15   6    1.50    6.90
  -2 -15   6   -2.30    4.50
  -3 -15   6   -4.10    6.40
  -3 -15   6    4.80    5.70
  -4 -15   6   -2.00    6.90
  -4 -15   6   -1.20    5.50
  -5 -15   6    4.50    8.30
   6 -14   6    1.00    5.00
   5 -14   6   16.50    8.40
   4 -14   6    0.20    6.50
   3 -14   6    3.80    6.90
   2 -14   6   33.30   10.40
   2 -14   6   17.80    7.50
   1 -14   6    7.80    7.00
   1 -14   6    8.80    6.80
   0 -14   6   34.00   10.20
   0 -14   6   37.80   10.60
  -1 -14   6   19.20    8.50
  -1 -14   6   34.80   10.00
  -2 -14   6    6.70    5.00
  -2 -14   6    5.80    6.80
  -3 -14   6    3.60    6.80
  -3 -14   6   -0.50    4.60
  -4 -14   6   11.90    6.70
  -4 -14   6    7.00    8.50
  -5 -14   6   19.30    9.60
  -6 -14   6   -0.80    6.00
   7 -13   6    2.70    7.50
   6 -13   6    7.80    7.80
   5 -13   6   25.30   10.60
   4 -13   6   11.60    8.00
   3 -13   6   14.10    6.50
   3 -13   6   16.40    8.90
   2 -13   6   76.19   15.00
   2 -13   6   44.70    9.90
   1 -13   6   14.40    6.60
   1 -13   6   10.00    6.10
   0 -13   6   47.00   11.00
   0 -13   6   26.50    8.60
  -1 -13   6    3.00    6.00
  -1 -13   6    8.60    5.70
  -2 -13   6    0.90    4.10
  -2 -13   6   -0.10    6.20
  -3 -13   6   28.30    8.30
  -3 -13   6   16.00    8.50
  -4 -13   6   -0.10    4.70
  -4 -13   6   10.40    8.20
  -5 -13   6   41.10   12.20
  -5 -13   6   35.30    8.30
  -6 -13   6    7.10    7.60
  -7 -13   6   15.50   10.20
  -8 -13   6    1.30    6.50
   8 -12   6    2.70    7.50
   7 -12   6    5.60    8.20
   6 -12   6    9.70    8.10
   5 -12   6   18.90    8.90
   4 -12   6   -1.30    4.40
   3 -12   6   -3.70    4.00
   3 -12   6    2.90    5.40
   2 -12   6    5.60    5.30
   2 -12   6    7.90    6.20
   1 -12   6   72.09   11.90
   1 -12   6   73.69   13.20
   0 -12   6   53.99   11.20
   0 -12   6   47.50   10.10
  -1 -12   6  213.58   21.50
  -1 -12   6  183.58   19.80
  -2 -12   6   21.40    6.80
  -2 -12   6   24.30    8.00
  -3 -12   6  198.78   22.40
  -3 -12   6  225.38   17.30
  -4 -12   6   20.00    6.50
  -4 -12   6   29.30   10.60
  -5 -12   6    8.20    4.70
  -5 -12   6    8.60    7.80
  -6 -12   6    2.70    5.90
  -7 -12   6    4.20    6.90
  -8 -12   6   31.00   12.30
  -9 -12   6   -7.40    6.40
   9 -11   6    2.30    6.10
   8 -11   6   11.40    7.10
   7 -11   6   27.60   10.10
   6 -11   6   14.70    8.70
   5 -11   6   -1.10    4.90
   4 -11   6    0.80    3.60
   4 -11   6    2.80    5.00
   3 -11   6   27.80    8.70
   3 -11   6   31.80    6.90
   2 -11   6    2.00    5.30
   2 -11   6   -1.30    3.50
   1 -11   6  100.79   14.90
   1 -11   6   86.39   12.10
   0 -11   6   10.50    5.30
   0 -11   6   -2.40    4.10
  -1 -11   6  117.09   14.70
  -1 -11   6  105.19   14.30
  -2 -11   6    5.90    3.90
  -2 -11   6   16.90    7.40
  -3 -11   6    1.70    5.40
  -3 -11   6    0.10    3.70
  -4 -11   6   -4.10    3.20
  -4 -11   6   -6.80    4.60
  -5 -11   6   46.00    7.80
  -5 -11   6   40.90   10.80
  -6 -11   6   12.30    6.90
  -7 -11   6    4.00    6.80
  -8 -11   6   18.30    8.90
  -9 -11   6   31.80   11.70
 -10 -11   6   -2.80    7.40
  10 -10   6    4.50    7.70
   9 -10   6    4.20    6.50
   8 -10   6   35.70   10.80
   7 -10   6    4.50    6.30
   6 -10   6   61.89   12.50
   5 -10   6    4.10    5.30
   4 -10   6    3.10    3.30
   4 -10   6    1.50    4.30
   3 -10   6   23.00    5.70
   3 -10   6   32.50    9.30
   2 -10   6   11.50    4.70
   2 -10   6    5.60    5.10
   1 -10   6    4.30    4.70
   1 -10   6    6.40    4.20
   0 -10   6    9.00    5.30
   0 -10   6   13.30    6.10
  -1 -10   6   33.10    8.10
  -1 -10   6   20.80    6.90
  -2 -10   6   -0.90    4.70
  -2 -10   6    1.70    2.50
  -3 -10   6  176.48   15.80
  -3 -10   6  162.98   18.30
  -4 -10   6   53.79    8.20
  -4 -10   6   47.20   11.20
  -5 -10   6   12.60    7.00
  -5 -10   6   13.50    4.60
  -6 -10   6   -0.70    5.10
  -6 -10   6    2.90    3.00
  -7 -10   6    4.70    6.20
  -8 -10   6   18.90    8.50
  -9 -10   6    2.20    7.10
 -10 -10   6    5.90    7.80
  11  -9   6    4.80    7.10
  10  -9   6   -1.80    5.90
   9  -9   6    5.20    6.00
   8  -9   6    6.80    6.30
   7  -9   6    3.20    5.80
   6  -9   6   -4.20    3.60
   5  -9   6    8.20    6.00
   4  -9   6   24.70    4.60
   4  -9   6   32.00    8.00
   3  -9   6   12.70    5.90
   3  -9   6   20.40    4.70
   2  -9   6    6.90    4.80
   2  -9   6    2.40    3.40
   1  -9   6   11.30    4.70
   1  -9   6   12.00    5.30
   0  -9   6   -1.10    3.50
   0  -9   6    6.90    4.70
  -1  -9   6   -7.90    2.70
  -1  -9   6   -1.00    3.40
  -2  -9   6   73.59   11.60
  -3  -9   6   60.49   11.00
  -3  -9   6   61.29    8.90
  -4  -9   6    7.50    5.90
  -4  -9   6   10.60    4.20
  -5  -9   6   19.20    7.80
  -5  -9   6   24.30    5.20
  -6  -9   6   13.50    7.30
  -6  -9   6   24.80    4.70
  -7  -9   6   -7.70    4.70
  -8  -9   6    9.30    7.20
  -9  -9   6    4.40    6.00
 -10  -9   6   -6.50    4.70
  10   9  -6   14.40    7.30
 -11  -9   6   -7.00    5.90
  11   9  -6    4.00    6.60
  11  -8   6   -0.90    5.90
  10  -8   6   -0.10    5.50
   9  -8   6   42.60   10.90
   8  -8   6    9.60    6.40
   7  -8   6  191.18   21.50
   6  -8   6   32.30    9.20
   5  -8   6   82.09   13.30
   4  -8   6  111.59   14.60
   4  -8   6  104.79    6.90
  -4   8  -6  109.19    6.00
   3  -8   6  115.59   14.00
   3  -8   6  134.39    9.30
   2  -8   6  167.98   16.60
   2  -8   6  199.08   12.20
   1  -8   6    3.70    3.10
   1  -8   6   -2.90    2.90
   0  -8   6  143.09   14.20
   0  -8   6  107.39   11.80
  -1  -8   6    2.80    3.50
  -1  -8   6    2.00    3.90
  -3  -8   6    1.80    3.50
  -3  -8   6    0.00    2.60
  -4  -8   6    1.60    4.50
  -4  -8   6    2.10    2.60
  -5  -8   6    1.40    2.60
  -5  -8   6   -3.30    4.20
  -6  -8   6    9.60    6.40
  -6  -8   6    5.80    2.90
  -7  -8   6    0.70    4.60
  -8  -8   6    2.40    5.80
   8   8  -6    1.90    5.00
  -9  -8   6    3.70    6.80
   9   8  -6    4.40    4.90
 -10  -8   6   -0.30    6.60
  10   8  -6    9.20    6.00
 -11  -8   6    0.60    6.90
  11   8  -6    0.00    6.30
 -12  -8   6    6.60    8.90
  12   8  -6    6.90    6.80
  12  -7   6   17.30    8.50
  12  -7   6   -3.60    5.90
  11  -7   6    1.60    5.70
  10  -7   6   99.79   15.50
   9  -7   6   17.40    7.30
   8  -7   6    4.70    5.80
   7  -7   6    4.80    5.20
   6  -7   6  150.28   16.60
   5  -7   6   71.89   11.80
   4  -7   6  102.19    5.50
   4  -7   6  105.79   13.30
   3  -7   6   44.00    8.80
   3  -7   6   51.09    5.50
   2  -7   6  104.69   12.20
   2  -7   6  138.59    9.30
   1  -7   6    6.80    3.40
   1  -7   6    6.90    4.30
   0  -7   6   31.10    6.10
   0  -7   6   41.10    7.40
  -1  -7   6   88.89   10.40
  -1  -7   6   89.99   10.90
  -2  -7   6   86.79   11.10
  -3  -7   6   10.10    4.90
  -3  -7   6    8.40    3.50
  -4  -7   6   -0.40    3.20
  -4  -7   6   -1.70    1.70
  -5  -7   6   47.50    9.70
  -5  -7   6   56.19    6.30
  -6  -7   6   55.29    6.20
  -6  -7   6   17.50    6.80
  -7  -7   6   36.10   10.40
  -7  -7   6   37.30    4.90
   7   7  -6   32.80    7.80
  -8  -7   6   31.60    9.80
   8   7  -6   56.59   10.40
  -9  -7   6   59.59   13.10
   9   7  -6   67.39   11.80
 -10  -7   6    2.60    6.60
  10   7  -6   -2.30    5.10
 -11  -7   6    1.80    6.60
  11   7  -6    3.90    6.40
 -12  -7   6   16.60    8.80
  12   7  -6   25.60    9.70
  12  -6   6   -3.80    4.10
  12  -6   6   -3.70    5.40
  11  -6   6    0.70    6.00
  11  -6   6   -5.10    4.30
  10  -6   6    6.70    6.10
   9  -6   6   17.70    7.80
   8  -6   6  150.48   17.70
   7  -6   6    0.20    3.80
   6  -6   6  420.06   25.80
   5  -6   6    0.50    3.20
   4  -6   6    5.60    3.90
   3  -6   6  129.69   13.80
   3  -6   6  126.59    7.10
  -3   6  -6  124.89    6.60
   2  -6   6  390.16   22.00
   2  -6   6  389.56   17.20
   1  -6   6   27.00    4.90
   1  -6   6   39.80    6.90
   0  -6   6    0.10    2.60
   0  -6   6   -3.00    1.70
  -1  -6   6  317.87   17.70
  -1  -6   6  287.47   16.70
  -2  -6   6   51.79    8.20
  -3  -6   6  358.16   21.10
  -3  -6   6  350.36   17.50
  -4  -6   6    3.30    1.90
  -4  -6   6   -0.40    3.30
  -5  -6   6   76.69   11.30
  -5  -6   6   74.79    7.50
  -6  -6   6   42.40    9.20
  -6  -6   6   61.79    6.40
   6   6  -6   61.79    9.10
  -7  -6   6   -1.70    3.90
  -7  -6   6    2.30    2.40
   7   6  -6    4.10    4.60
   7   6  -6    7.70    2.80
  -8  -6   6   24.90    9.30
   8   6  -6   30.90    8.40
  -9  -6   6   12.60    6.80
   9   6  -6    1.40    5.10
 -10  -6   6   72.89   14.50
  10   6  -6   59.89   11.80
 -11  -6   6    6.00    7.40
  11   6  -6    9.60    7.50
 -12  -6   6   20.10    9.70
  12   6  -6    7.60    7.30
 -13  -6   6   -2.30    5.70
  13   6  -6    1.50    7.00
  12  -5   6    0.30    6.40
  12  -5   6    0.20    5.00
  11  -5   6    0.60    4.50
  11  -5   6    5.80    6.80
  10  -5   6    0.90    4.40
  10  -5   6    4.80    6.50
   9  -5   6    0.60    4.30
   8  -5   6  293.67   20.80
   7  -5   6   20.80    6.70
   6  -5   6   13.60    5.50
   5  -5   6   29.90    6.90
   4  -5   6  189.58   14.50
   3  -5   6   35.50    7.00
   3  -5   6   36.90    3.40
  -3   5  -6   44.40    3.40
   2  -5   6 1413.46   51.19
   2  -5   6 1471.65   57.99
  -2   5  -6 1451.35   51.59
   1  -5   6  236.98   12.50
   1  -5   6  257.07   15.40
   0  -5   6  201.78   11.60
   0  -5   6  169.08   12.00
  -1  -5   6  225.78   13.50
  -1  -5   6  213.38   13.00
  -3  -5   6    2.80    2.10
  -3  -5   6    9.60    4.30
  -4  -5   6   87.39   11.00
  -4  -5   6  111.89    7.90
  -5  -5   6    3.60    3.80
  -5  -5   6   -0.10    2.00
   5   5  -6   -3.60    2.20
  -6  -5   6  343.37   22.50
  -6  -5   6  342.17   16.50
   6   5  -6  367.06   19.90
  -7  -5   6   34.50    9.20
   7   5  -6   41.70    4.70
   7   5  -6   39.60    8.00
  -8  -5   6   20.50    8.00
   8   5  -6   30.60    8.00
  -9  -5   6    0.50    5.80
   9   5  -6    0.10    5.40
 -10  -5   6    1.50    5.60
  10   5  -6   10.30    5.70
 -11  -5   6   15.40    7.90
  11   5  -6   15.70    7.60
 -12  -5   6    0.90    6.60
  12   5  -6    1.40    6.30
 -13  -5   6    0.70    5.70
  13   5  -6   10.60    8.40
  13  -4   6    0.70    5.90
  13  -4   6   -1.70    7.10
  12  -4   6    3.70    6.10
  12  -4   6   -0.90    5.20
  11  -4   6    2.80    5.80
  11  -4   6   -0.50    4.20
  10  -4   6    8.90    5.30
  10  -4   6    6.00    6.70
   9  -4   6   -2.80    4.00
   9  -4   6    3.30    5.20
   8  -4   6   -0.40    4.00
   7  -4   6   28.30    7.20
   6  -4   6  102.79   12.00
   5  -4   6   25.00    5.70
   4  -4   6    4.60    3.50
   3  -4   6  160.98   12.00
   2  -4   6  114.69    6.60
   2  -4   6  116.99   10.70
  -2   4  -6  117.79    6.70
   1  -4   6   64.59    6.10
   1  -4   6   57.89    7.50
   0  -4   6 1724.23   62.99
   0  -4   6 1770.82   65.99
  -1  -4   6   16.30    4.00
  -1  -4   6   16.60    3.90
  -3  -4   6  155.08   11.70
  -3  -4   6  155.48    9.50
  -4  -4   6  466.05   20.20
  -4  -4   6  431.86   23.50
   4   4  -6  434.36   20.20
  -5  -4   6   45.70    8.60
  -5  -4   6   52.69    6.20
   5   4  -6   51.89    7.10
  -6  -4   6  122.49    8.60
  -6  -4   6  137.79   15.70
   6   4  -6  127.39   12.20
  -7  -4   6   11.00    5.40
   7   4  -6   14.10    5.70
  -8  -4   6  340.37   23.40
   8   4  -6  345.07   21.30
   8   4  -6  348.27   14.10
  -9  -4   6   -1.00    5.10
   9   4  -6    4.60    5.40
 -10  -4   6   74.79   13.90
  10   4  -6   70.69   12.00
 -11  -4   6    0.80    6.00
  11   4  -6    0.80    5.60
 -12  -4   6   -1.80    5.60
  12   4  -6   -4.70    5.80
 -13  -4   6    0.20    5.80
  13   4  -6    7.20    7.10
  13  -3   6   -2.00    5.20
  12  -3   6    5.40    5.10
  12  -3   6    3.50    6.10
  11  -3   6    0.70    4.20
  11  -3   6   -6.70    3.60
  10  -3   6    2.00    4.30
  10  -3   6    9.50    6.40
   9  -3   6   24.70    8.30
   9  -3   6   21.40    6.50
   8  -3   6   20.70    6.90
   8  -3   6   16.10    5.60
   7  -3   6   30.10    7.70
   7  -3   6   24.20    6.10
   6  -3   6   38.50    7.50
   5  -3   6  341.87   19.20
   4  -3   6  118.79   11.10
   3  -3   6   20.40    4.70
  -3   3  -6   18.90    1.70
  -3   3  -6   16.60    2.10
   2  -3   6    5.00    2.90
   2  -3   6    7.40    1.80
  -2   3  -6    4.80    1.70
   1  -3   6  234.48   13.40
   1  -3   6  224.68   11.00
   0  -3   6  957.80   37.70
   0  -3   6  933.01   35.90
  -1  -3   6    2.80    2.30
  -1  -3   6    4.60    2.40
  -2  -3   6   22.40    3.90
  -2  -3   6   42.80    6.40
  -3  -3   6    1.50    1.90
  -3  -3   6   -0.10    2.40
   3   3  -6    1.60    1.90
  -4  -3   6   33.60    4.90
  -4  -3   6   20.10    5.60
   4   3  -6   13.60    3.50
  -5  -3   6   77.49   10.40
   5   3  -6   75.79    8.10
  -6  -3   6   -0.10    2.70
   6   3  -6    0.20    2.70
  -7  -3   6    5.10    4.30
   7   3  -6    9.10    4.50
  -8  -3   6  212.38   21.00
   8   3  -6  213.28   16.10
  -9  -3   6   -0.10    4.70
   9   3  -6   -0.30    2.30
   9   3  -6   -6.90    4.00
 -10  -3   6  128.99   17.90
  10   3  -6  113.19   15.00
 -11  -3   6    0.70    5.50
  11   3  -6    5.10    6.10
 -12  -3   6   -3.50    5.60
  12   3  -6   -4.00    5.70
 -13  -3   6    1.80    5.90
  13   3  -6    1.00    6.40
  13  -2   6   -0.80    6.10
  12  -2   6   -1.50    4.20
  12  -2   6    4.20    6.00
  11  -2   6    2.10    6.10
  11  -2   6   -1.80    3.90
  10  -2   6  111.89   16.30
  10  -2   6  133.99   14.20
   9  -2   6   42.60   10.10
   9  -2   6   26.00    6.50
  -9   2  -6   42.30    5.70
   8  -2   6  270.47   17.80
   8  -2   6  276.67   20.30
  -8   2  -6  291.47   13.80
   7  -2   6  156.98   16.40
   7  -2   6  160.88   12.50
  -7   2  -6  158.78    8.90
   6  -2   6  234.58   14.60
   6  -2   6  215.18   15.60
   6  -2   6  209.08    9.20
  -6   2  -6  209.88   10.00
   5  -2   6  118.69   12.10
   5  -2   6  139.69   12.30
   5  -2   6  113.59    5.70
  -5   2  -6  132.79    6.50
   4  -2   6   69.39    8.10
  -4   2  -6   63.29    4.10
  -4   2  -6   72.19    4.20
   3  -2   6   15.60    4.10
  -3   2  -6   28.80    3.10
  -3   2  -6   28.50    2.60
   2  -2   6  310.27   15.70
  -2   2  -6  299.17   12.90
  -2   2  -6  313.37   12.20
   1  -2   6  432.86   19.30
   1  -2   6  409.06   17.10
   0  -2   6    4.60    2.60
   0  -2   6    5.20    2.10
  -1  -2   6 1230.78   47.10
  -1  -2   6 1297.97   48.10
  -2  -2   6   80.49    7.60
  -2  -2   6   87.59    8.70
  -2  -2   6   87.99    5.10
  -3  -2   6   27.80    4.60
  -3  -2   6   35.70    6.20
  -3  -2   6   38.30    4.30
   3   2  -6   43.30    4.30
  -4  -2   6    2.90    3.10
  -4  -2   6   -2.30    1.70
   4   2  -6    2.00    2.40
  -5  -2   6   66.19    7.30
  -5  -2   6   56.39    8.60
   5   2  -6   62.39    7.50
  -6  -2   6   15.90    5.10
   6   2  -6   24.10    5.40
  -7  -2   6   37.90    7.80
   7   2  -6   20.70    5.90
  -8  -2   6   30.20    7.80
   8   2  -6   39.80    8.40
  -9  -2   6   45.20    9.80
   9   2  -6   52.89   10.10
 -10  -2   6   21.20    8.10
  10   2  -6   16.90    4.50
  10   2  -6    7.30    6.80
 -11  -2   6   28.80    9.00
  11   2  -6   15.10    7.80
 -12  -2   6   27.40    9.00
  12   2  -6   21.60    9.40
 -13  -2   6   -4.00    5.00
  13   2  -6    0.10    6.60
  14   2  -6    1.60    6.90
  13  -1   6    3.30    6.90
  12  -1   6   83.39   15.80
  11  -1   6   73.69   10.30
  11  -1   6   67.59   14.30
  10  -1   6   15.30    8.00
  10  -1   6   11.70    4.90
 -10   1  -6   11.90    4.60
   9  -1   6    5.20    5.50
   9  -1   6    9.40    4.40
  -9   1  -6    3.70    3.50
   8  -1   6    2.10    3.20
   8  -1   6   -4.90    3.10
  -8   1  -6    0.10    2.70
   7  -1   6    1.90    4.10
   7  -1   6   -5.30    1.90
  -7   1  -6   -0.40    2.20
   6  -1   6   13.60    4.20
   6  -1   6   10.00    4.40
  -6   1  -6   15.20    3.20
   5  -1   6  109.39   11.60
   5  -1   6  134.99    9.90
  -5   1  -6  127.79    7.70
   4  -1   6  183.58   12.30
   4  -1   6  175.18   11.40
   4  -1   6  187.18    8.50
  -4   1  -6  186.38    9.10
   3  -1   6  171.58    7.80
   3  -1   6  163.28   10.40
   3  -1   6  161.38   10.40
  -3   1  -6  166.58    8.00
   2  -1   6  290.67   14.50
  -2   1  -6  275.27   11.60
  -2   1  -6  283.17   12.50
   1  -1   6   45.10    4.60
   1  -1   6   39.80    5.00
   0  -1   6    0.10    1.60
   0  -1   6   -0.20    1.30
  -1  -1   6  636.84   26.90
  -1  -1   6  684.83   27.80
  -2  -1   6    6.40    2.80
  -2  -1   6    6.10    2.80
   2   1  -6    5.00    1.30
  -3  -1   6  150.18   10.60
   3   1  -6  160.48    8.00
  -4  -1   6  246.08   13.50
  -4  -1   6  211.98   14.00
   4   1  -6  228.48   11.70
  -5  -1   6  243.08   15.80
   5   1  -6  227.88   13.00
  -6  -1   6  516.25   26.30
   6   1  -6  491.35   23.70
  -7  -1   6    1.90    3.70
   7   1  -6    5.20    3.80
  -8  -1   6  208.48   19.60
   8   1  -6  216.68   15.90
  -9  -1   6   71.39   12.10
   9   1  -6   60.59   10.50
 -10  -1   6   51.59   10.50
  10   1  -6   51.49   10.70
  10   1  -6   43.20    7.60
 -11  -1   6   59.89   12.40
  11   1  -6   42.50   10.50
 -12  -1   6   -0.90    4.50
  12   1  -6    1.30    6.30
 -13  -1   6   11.10    6.80
  13   1  -6   17.50    9.50
  14   1  -6   26.00   10.80
  13   0   6    3.20    6.40
  12   0   6   37.60   11.80
  11   0   6    8.90    4.30
  11   0   6  -10.10    5.20
 -11   0  -6    0.50    4.00
  10   0   6  247.98   25.50
  10   0   6  216.28   14.70
 -10   0  -6  216.78   15.30
   9   0   6   -2.60    2.90
   9   0   6    0.90    5.20
  -9   0  -6   -5.20    2.80
   8   0   6   26.30    5.40
   8   0   6   21.50    7.10
  -8   0  -6   23.10    5.80
   7   0   6    0.70    3.90
   7   0   6    0.00    2.30
  -7   0  -6    0.00    2.50
   6   0   6   -2.70    2.80
   6   0   6    3.00    2.40
  -6   0  -6   -1.80    1.80
   5   0   6   -0.60    1.80
   5   0   6   -2.50    2.10
  -5   0  -6   -2.10    1.70
   4   0   6   21.00    4.10
   4   0   6   11.70    4.10
  -4   0  -6   21.40    3.60
   3   0   6    0.20    1.60
   3   0   6   -1.10    1.40
  -3   0  -6   -0.80    1.10
   2   0   6  173.38   10.50
  -2   0  -6  172.38    8.40
   1   0   6   -0.30    1.70
   1   0   6    0.20    1.20
  -1   0  -6   -0.40    0.60
   0   0   6  391.76   17.80
   0   0   6  441.06   16.10
   0   0   6  425.16   19.60
   0   0  -6  427.46   15.90
  -1   0   6   -2.10    1.90
  -1   0   6    3.50    2.00
  -2   0   6  785.12   31.80
  -2   0   6  776.12   31.00
   2   0  -6  723.33   26.80
  -3   0   6    0.40    2.10
  -3   0   6   -1.00    2.10
   3   0  -6   -0.20    1.10
  -4   0   6   86.99    9.90
   4   0  -6   79.19    6.90
  -5   0   6    5.20    3.30
   5   0  -6    1.30    2.10
  -6   0   6  219.18   15.40
   6   0  -6  208.58   13.10
  -7   0   6    1.70    3.70
   7   0  -6   -1.00    2.50
  -8   0   6   28.90    7.40
   8   0  -6   39.30    7.90
  -9   0   6   -3.80    3.90
   9   0  -6   -0.90    4.50
 -10   0   6  140.79   17.10
  10   0  -6  149.29   17.40
  10   0  -6  153.38   14.90
 -11   0   6    6.00    5.80
  11   0  -6   -2.50    5.90
  11   0  -6   -2.00    3.70
 -12   0   6   25.30    9.00
  12   0  -6   40.90   10.80
 -13   0   6   -0.40    5.70
  13   0  -6    6.90    6.80
  14   0  -6   -0.20    7.30
  13   1   6  -11.50    4.50
  12   1   6   94.69   17.90
  11   1   6   56.19    9.60
  11   1   6   59.59   13.90
 -11  -1  -6   55.89   10.10
  10   1   6   13.20    7.90
  10   1   6   28.60    6.40
 -10  -1  -6   17.70    6.00
   9   1   6    5.50    6.00
   9   1   6    5.10    4.00
  -9  -1  -6    2.70    4.30
   8   1   6    1.40    2.80
   8   1   6    6.70    5.20
  -8  -1  -6   -5.20    2.60
   7   1   6   -0.50    2.40
   7   1   6   -1.20    3.20
  -7  -1  -6    0.30    2.70
   6   1   6    7.20    3.30
   6   1   6    6.20    4.60
  -6  -1  -6   14.60    4.20
   5   1   6  117.79   12.60
   5   1   6  115.99    9.10
  -5  -1  -6  130.09    9.00
   4   1   6  195.68   11.80
   4   1   6  187.38   12.70
  -4  -1  -6  185.58   10.80
   3   1   6  183.68   11.10
   3   1   6  174.98   11.20
  -3  -1  -6  159.78    9.30
   2   1   6  273.87   14.50
   1   1   6   44.90    4.60
   1   1   6   33.50    5.20
  -1  -1  -6   42.00    4.50
   0   1   6   -0.30    2.00
   0   1   6    2.60    1.20
   0  -1  -6   -0.50    1.20
   0  -1  -6    0.60    1.40
  -1   1   6  620.34   25.60
  -1   1   6  632.94   27.60
   1  -1  -6  624.04   22.70
  -2   1   6    3.60    2.80
  -2   1   6    7.30    2.60
  -3   1   6  148.19   10.30
  -4   1   6  274.47   15.80
  -5   1   6  247.68   15.70
  -6   1   6  507.15   26.20
   6  -1  -6  540.15   24.70
  -7   1   6   -1.00    2.90
   7  -1  -6   -1.10    2.70
  -8   1   6  209.98   16.00
   8  -1  -6  221.88   16.10
  -9   1   6   59.69   10.30
   9  -1  -6   78.79   11.80
 -10   1   6   42.20    9.50
  10  -1  -6   47.30   10.70
  10  -1  -6   53.29   10.00
 -11   1   6   44.10   10.20
  11  -1  -6   38.50    8.80
  11  -1  -6   44.40   10.70
 -12   1   6    5.20    5.80
  12  -1  -6   -3.60    4.40
 -13   1   6    2.60    3.90
  13  -1  -6   17.10    9.40
  14  -1  -6   12.60    8.70
  13   2   6    0.10    7.20
  12   2   6   -2.60    5.80
 -12  -2  -6   -1.10    5.60
  11   2   6   -6.80    5.90
 -11  -2  -6   -0.70    4.70
  10   2   6  118.99   17.40
  10   2   6  122.39   12.20
 -10  -2  -6  136.59   15.60
   9   2   6   19.50    8.50
   9   2   6   21.00    5.60
  -9  -2  -6   47.70    8.90
   8   2   6  278.97   16.00
   8   2   6  242.88   22.90
  -8  -2  -6  263.37   17.30
   7   2   6  162.68   11.70
   7   2   6  153.28   16.90
  -7  -2  -6  176.38   15.60
   6   2   6  203.78   12.70
   6   2   6  205.18   18.60
  -6  -2  -6  199.98   13.60
   5   2   6  122.79   10.50
   5   2   6  120.49   12.40
  -5  -2  -6   76.69    9.10
   4   2   6   82.49    8.40
   4   2   6   66.29    8.60
   3   2   6   26.60    4.70
   3   2   6   19.40    4.40
  -3  -2  -6   22.90    4.30
   2   2   6  321.17   15.40
   2   2   6  320.97   16.40
  -2  -2  -6  286.27   14.40
   1   2   6  422.66   19.50
   1   2   6  326.57   16.40
  -1  -2  -6  433.06   17.30
   0   2   6    4.70    2.90
   0  -2  -6    4.00    1.90
  -1   2   6 1267.97   50.59
   1  -2  -6 1269.97   46.30
  -2   2   6   93.09    8.60
  -3   2   6   28.30    5.10
  -4   2   6    1.40    2.90
  -5   2   6   62.29    8.40
  -6   2   6   31.70    6.60
  -7   2   6   31.40    6.80
  -8   2   6   42.00    8.10
   8  -2  -6   39.30    7.90
  -9   2   6   65.69   10.70
   9  -2  -6   43.60    9.20
 -10   2   6   18.10    6.80
  10  -2  -6   15.40    6.90
  10  -2  -6   17.10    6.60
 -11   2   6   11.10    4.70
  11  -2  -6   27.40    8.60
  11  -2  -6   12.30    7.00
 -12   2   6    8.20    5.20
  12  -2  -6   21.50    8.20
  12  -2  -6   41.90    9.40
 -13   2   6   -3.10    4.60
  13  -2  -6    8.50    7.00
  14  -2  -6   -4.30    7.10
  13   3   6   -6.20    5.70
  12   3   6    7.50    7.50
 -12  -3  -6   -4.20    4.50
  11   3   6    7.30    6.90
 -11  -3  -6    1.00    5.60
  10   3   6   11.40    7.30
 -10  -3  -6    9.90    5.90
   9   3   6   25.00    8.60
   9   3   6   28.30    6.10
  -9  -3  -6   15.90    6.70
   8   3   6   16.30    7.00
   8   3   6   24.80    5.70
  -8  -3  -6   42.00    8.40
   7   3   6   28.70    7.70
   7   3   6   23.70    5.40
   6   3   6   30.60    5.90
   6   3   6   20.60    6.30
  -6  -3  -6   31.80    6.50
   5   3   6  333.27   17.80
   5   3   6  335.37   19.80
  -5  -3  -6  350.76   18.80
   4   3   6  121.79   12.10
   4   3   6  137.29   10.30
  -4  -3  -6  134.69   10.10
   3   3   6   16.80    4.40
   3   3   6   26.00    5.10
  -3  -3  -6   20.60    4.30
   2   3   6    3.70    2.90
   2   3   6    6.60    2.70
  -2  -3  -6    2.70    2.20
   1   3   6  238.98   14.10
   1   3   6  182.18   10.90
  -1  -3  -6  230.18   11.80
   0   3   6  996.40   40.40
   0  -3  -6  905.71   36.00
   1  -3  -6    1.40    1.90
   2  -3  -6   29.40    4.30
  -3   3   6    5.60    2.80
  -4   3   6   24.80    5.40
  -5   3   6   96.59   10.50
  -6   3   6    1.60    2.80
  -7   3   6    9.50    4.20
  -8   3   6  222.08   15.90
  -9   3   6   -0.50    3.50
   9  -3  -6    4.20    5.20
  10  -3  -6  142.29   17.70
  10  -3  -6  144.79   17.20
 -11   3   6    3.10    5.00
  11  -3  -6    4.70    6.40
  11  -3  -6   11.00    7.20
 -12   3   6    1.70    4.80
  12  -3  -6    1.00    5.40
  12  -3  -6    2.80    5.60
 -13   3   6    4.90    5.30
  13  -3  -6    3.10    7.10
  13   4   6   10.20    8.90
  12   4   6    4.80    6.30
 -12  -4  -6    6.90    6.10
  11   4   6    9.40    7.80
 -11  -4  -6   -3.50    4.80
  10   4   6    6.60    6.30
 -10  -4  -6    3.10    3.90
   9   4   6    0.30    5.60
   9   4   6    0.50    3.50
  -9  -4  -6    2.00    4.00
   8   4   6   -3.90    2.80
   8   4   6    5.30    5.60
  -8  -4  -6   -1.30    3.80
   7   4   6   35.20    8.60
   7   4   6   46.80    7.10
  -7  -4  -6   29.20    7.50
   6   4   6  104.39   10.30
   6   4   6   75.89   11.10
  -6  -4  -6   98.69   11.70
   5   4   6   19.60    5.60
   5   4   6   28.50    5.70
  -5  -4  -6   24.90    5.90
   4   4   6    2.50    2.90
   4   4   6    4.10    3.90
  -4  -4  -6    4.10    3.10
   3   4   6  203.28   13.50
   3   4   6  167.78   12.40
  -3  -4  -6  193.98   12.50
   2   4   6  134.79   12.80
   2   4   6  136.49   11.70
  -2  -4  -6  128.79    9.80
  -1  -4  -6   56.39    6.90
   0  -4  -6 1775.22   64.59
   1  -4  -6   20.80    4.20
   2  -4  -6  607.54   25.30
   3  -4  -6  143.49    9.50
   4  -4  -6  472.95   21.30
  -5   4   6   43.80    6.90
  -6   4   6  113.49   11.40
  -7   4   6    3.30    3.70
  -8   4   6  185.28   13.80
  -9   4   6   -1.60    2.60
   9  -4  -6    0.40    5.10
 -10   4   6   66.79   10.90
  10  -4  -6   82.59   14.10
 -11   4   6   -2.10    3.90
  11  -4  -6   -3.30    3.90
  11  -4  -6   -3.50    5.00
 -12   4   6    4.20    5.00
  12  -4  -6   -1.20    5.10
  12  -4  -6    7.60    6.70
 -13   4   6    1.10    4.70
  13  -4  -6   -2.20    5.80
  13  -4  -6    6.00    7.20
  12   5   6    4.70    6.80
 -12  -5  -6   -6.70    4.00
  11   5   6    1.20    6.10
 -11  -5  -6    2.90    5.50
  10   5   6    5.80    5.60
 -10  -5  -6    2.50    5.20
   9   5   6    0.50    5.30
  -9  -5  -6    8.40    6.10
   8   5   6  270.67   21.30
  -8  -5  -6  319.77   22.00
   7   5   6   22.30    7.50
  -7  -5  -6   18.90    6.90
   6   5   6    7.70    5.70
  -6  -5  -6   14.00    5.50
   5   5   6   35.30    7.80
  -5  -5  -6   33.40    6.90
   4   5   6  212.08   14.80
  -4  -5  -6  203.98   14.50
   3   5   6   38.50    7.20
  -3  -5  -6   37.30    6.60
  -2  -5  -6 1346.47   52.69
  -1  -5  -6  261.67   15.00
   0  -5  -6  162.88   10.80
   1  -5  -6  196.38   11.90
   2  -5  -6  775.62   31.70
   3  -5  -6    1.30    2.40
   4  -5  -6  141.29    9.80
   5  -5  -6    0.90    2.70
   6  -5  -6  320.97   17.00
  -7   5   6   27.80    6.30
  -8   5   6   11.00    4.40
  -9   5   6    1.50    3.90
   9  -5  -6    2.60    5.30
 -10   5   6    5.90    4.50
  10  -5  -6   17.30    8.10
 -11   5   6   20.40    6.70
  11  -5  -6   22.40    9.00
 -12   5   6   -0.30    4.30
  12  -5  -6    5.00    6.80
  12  -5  -6    6.70    7.30
 -13   5   6    7.00    6.40
  13  -5  -6   -1.30    6.20
  13  -5  -6   14.00    8.60
  12   6   6    0.00    6.20
 -12  -6  -6    2.10    6.30
  11   6   6   -1.50    5.10
 -11  -6  -6   -2.30    5.30
  10   6   6    5.10    6.20
 -10  -6  -6    3.10    4.80
   9   6   6   15.70    8.60
  -9  -6  -6   29.60    8.80
   8   6   6   98.89   15.10
  -8  -6  -6  120.29   16.10
   7   6   6   -0.30    5.10
  -7  -6  -6    0.60    4.60
   6   6   6  440.16   25.90
  -6  -6  -6  400.16   25.10
   5   6   6    3.30    4.00
  -5  -6  -6    7.90    5.00
   4   6   6    0.50    3.10
  -4  -6  -6   -0.60    2.80
   3   6   6  156.58   11.90
  -3  -6  -6  127.69   13.20
  -2  -6  -6  400.26   21.40
  -1  -6  -6   36.50    6.80
   0  -6  -6    0.40    2.60
   1  -6  -6  287.37   16.00
   2  -6  -6   53.69    7.00
   3  -6  -6  325.07   17.00
   4  -6  -6    0.50    2.30
   5  -6  -6   83.49    9.10
   6  -6  -6   41.20    6.50
   7  -6  -6    3.40    3.10
   8  -6  -6   27.00    6.00
   9  -6  -6   -0.60    3.50
   9  -6  -6   -1.90    5.50
  10  -6  -6   66.19   13.90
  10  -6  -6   54.09    8.40
  11  -6  -6    4.30    7.20
  11  -6  -6    4.80    4.60
  12  -6  -6   16.80    8.20
  12  -6  -6    6.30    8.40
  12  -6  -6   17.80    6.20
  13  -6  -6   -6.00    6.10
  13  -6  -6    6.50    6.90
  12   7   6   -3.10    7.80
 -12  -7  -6   16.00    9.40
  11   7   6    0.80    6.10
 -11  -7  -6    3.20    5.70
  10   7   6   79.49   15.30
 -10  -7  -6   70.89   13.90
   9   7   6   19.70    8.50
  -9  -7  -6   18.40    7.50
   8   7   6    3.00    5.20
  -8  -7  -6    3.70    5.50
   7   7   6   15.10    7.00
  -7  -7  -6    0.30    4.20
   6   7   6  147.69   16.60
  -6  -7  -6  176.98   18.70
   5   7   6   49.80    9.70
  -5  -7  -6   73.99   11.40
   4   7   6  142.79   15.30
  -4  -7  -6  116.69   14.30
  -3  -7  -6   28.90    6.50
  -2  -7  -6  148.19   14.30
  -1  -7  -6   14.00    4.60
   0  -7  -6   41.50    7.60
   1  -7  -6   81.19   10.00
   2  -7  -6   97.59   10.40
   3  -7  -6    4.90    3.10
   4  -7  -6    2.70    2.90
   5  -7  -6   46.80    6.90
   6  -7  -6   60.59    8.30
   7  -7  -6   38.40    6.80
   8  -7  -6   49.10   12.90
   8  -7  -6   44.40    7.50
   9  -7  -6   62.29   14.20
   9  -7  -6   63.09    8.90
  10  -7  -6   10.00    7.50
  10  -7  -6    6.00    4.60
  11  -7  -6    9.20    7.90
  11  -7  -6   10.30    5.20
  12  -7  -6   26.20   11.30
  11   8   6    1.80    6.10
 -11  -8  -6   18.40    9.70
  10   8   6    1.70    6.60
 -10  -8  -6    2.90    6.50
   9   8   6   56.29   12.50
  -9  -8  -6   35.30   10.40
   8   8   6   -7.90    4.10
  -8  -8  -6    1.40    5.40
   7   8   6  119.59   15.60
  -7  -8  -6  167.88   19.20
   6   8   6   22.20    8.00
  -6  -8  -6   31.80    9.10
   5   8   6   65.19   11.00
  -5  -8  -6   89.69   13.30
  -4  -8  -6  114.69   14.80
  -3  -8  -6  122.59   14.10
  -2  -8  -6  203.18   15.40
  -1  -8  -6    0.70    2.90
   0  -8  -6  138.99   13.90
   1  -8  -6    0.20    2.40
   2  -8  -6  212.78   14.70
   3  -8  -6   -0.60    2.60
   4  -8  -6    0.50    2.80
   5  -8  -6    7.20    4.00
   6  -8  -6    8.30    4.20
   7  -8  -6   16.40    5.00
   8  -8  -6    0.80    3.30
   8  -8  -6   -1.80    6.40
   9  -8  -6    2.90    4.00
   9  -8  -6   -1.80    6.60
  10  -8  -6   13.60    5.40
  10  -8  -6    5.70    8.00
  11  -8  -6   13.50    8.80
  11  -8  -6   15.20    5.50
  12  -8  -6    8.30    8.80
  11   9   6    5.10    6.30
 -11  -9  -6   -5.90    6.10
  10   9   6   -1.20    4.60
 -10  -9  -6    4.30    6.20
   9   9   6    9.40    6.90
  -9  -9  -6    9.10    7.00
   8   9   6    7.20    6.20
  -8  -9  -6   11.00    7.30
   7   9   6   -2.70    5.00
  -7  -9  -6    1.00    5.60
   6   9   6    0.90    4.80
  -6  -9  -6    1.50    4.20
  -5  -9  -6    4.90    5.10
  -4  -9  -6   28.80    8.40
  -3  -9  -6    7.50    5.20
  -2  -9  -6    3.00    3.60
  -1  -9  -6    9.40    4.50
   0  -9  -6    7.50    4.70
   1  -9  -6   -1.50    3.20
   2  -9  -6   88.49   11.10
   3  -9  -6   73.89   10.70
   4  -9  -6    5.90    4.50
   5  -9  -6   12.70    4.70
   6  -9  -6   25.20    5.90
   7  -9  -6   -8.10    4.50
   7  -9  -6    1.60    3.50
   8  -9  -6   -4.10    6.20
   8  -9  -6    8.20    4.90
   9  -9  -6    9.10    8.80
   9  -9  -6   -0.40    3.70
  10  -9  -6    0.30    4.20
  10  -9  -6    0.80    7.70
  11  -9  -6    4.40    8.00
  10  10   6   17.10    8.80
 -10 -10  -6   -1.80    5.60
   9  10   6   22.40    9.20
  -9 -10  -6   26.20    9.70
   8  10   6   49.50   11.50
  -8 -10  -6   30.10   11.00
  -7 -10  -6    1.10    6.10
  -6 -10  -6   58.79   12.90
  -5 -10  -6    5.60    5.80
  -4 -10  -6    3.70    5.20
  -3 -10  -6    3.60    5.50
  -2 -10  -6    5.10    4.70
  -1 -10  -6    4.40    5.00
   0 -10  -6   16.50    6.00
   1 -10  -6   24.10    6.90
   2 -10  -6    1.50    4.20
   3 -10  -6  217.08   16.40
   4 -10  -6   54.99    9.60
   5 -10  -6   16.70    5.80
   6 -10  -6    3.10    4.50
   6 -10  -6   -9.20    5.20
   7 -10  -6    9.80    8.20
   7 -10  -6    9.90    4.50
   8 -10  -6   19.40    6.30
   8 -10  -6   20.90   10.50
   9 -10  -6    9.00    5.00
   9 -10  -6    0.60    7.10
  10 -10  -6   19.00    6.20
  10 -10  -6   16.60   10.20
  11 -10  -6    9.90    9.20
  -9 -11  -6    4.60    6.40
  -8 -11  -6   -5.60    6.30
  -7 -11  -6   15.20    8.70
  -6 -11  -6    5.90    6.30
  -5 -11  -6   -2.20    5.20
  -4 -11  -6   -0.40    4.10
  -3 -11  -6   41.00   10.90
  -2 -11  -6   -3.20    3.40
  -1 -11  -6   46.40   10.20
   0 -11  -6   -0.90    3.80
   1 -11  -6   94.69   13.50
   2 -11  -6   19.40    6.60
   3 -11  -6    6.80    4.90
   4 -11  -6    4.00    4.60
   5 -11  -6   36.00   12.90
   5 -11  -6   47.80    9.00
   6 -11  -6    5.30    8.10
   6 -11  -6   38.50    8.50
   7 -11  -6   -0.10    3.90
   7 -11  -6    3.70    7.00
   8 -11  -6   21.90   12.20
   8 -11  -6   18.60    6.70
   9 -11  -6   33.60   14.00
   9 -11  -6   40.10    8.50
  10 -11  -6    5.50   10.20
  -8 -12  -6    4.20    8.00
  -7 -12  -6    4.60    6.10
  -6 -12  -6   12.80    8.10
  -5 -12  -6   21.50    8.80
  -4 -12  -6    0.40    5.00
  -3 -12  -6    5.20    5.10
  -2 -12  -6    1.40    5.60
  -1 -12  -6   88.99   14.50
   0 -12  -6   45.50   10.10
   1 -12  -6  148.69   17.50
   2 -12  -6   38.40    8.90
   3 -12  -6  226.38   20.90
   3 -12  -6  187.48   25.20
   4 -12  -6   33.80   11.30
   4 -12  -6   32.80    9.00
   5 -12  -6    3.70    8.00
   5 -12  -6   10.80    6.30
   6 -12  -6   -4.60    4.70
   6 -12  -6    2.50    7.80
   7 -12  -6   17.30    6.20
   7 -12  -6    2.70    7.60
   8 -12  -6   29.70   12.10
   8 -12  -6   29.90    8.30
   9 -12  -6   -3.80    7.80
  -7 -13  -6   -5.10    5.70
  -6 -13  -6    3.80    7.30
  -5 -13  -6   17.10    8.60
  -5 -13  -6   10.70    6.50
  -4 -13  -6    9.00    7.10
  -4 -13  -6    0.30    5.90
  -3 -13  -6    4.30    6.40
  -3 -13  -6   16.10    7.20
  -2 -13  -6   43.10   12.30
  -2 -13  -6   30.30    9.80
  -1 -13  -6    7.90    6.50
  -1 -13  -6    3.60    7.50
   0 -13  -6   37.20   10.00
   0 -13  -6   37.00   11.30
   1 -13  -6    1.50    4.90
   1 -13  -6    4.90    6.50
   2 -13  -6    4.00    5.50
   2 -13  -6   18.30    9.60
   3 -13  -6    8.60    9.70
   3 -13  -6   26.30    8.30
   4 -13  -6    3.90    5.70
   4 -13  -6   17.80    9.70
   5 -13  -6   25.90   10.60
   5 -13  -6   48.70   10.40
   6 -13  -6    4.50    8.60
   6 -13  -6    4.60    6.50
   7 -13  -6   30.10   13.60
   7 -13  -6   28.00    8.90
   8 -13  -6   18.40   11.40
   8 -13  -6    4.10    6.60
  -6 -14  -6   -2.70    7.00
  -5 -14  -6    5.50    8.60
  -4 -14  -6    0.60    6.10
  -4 -14  -6   -2.10    5.30
  -3 -14  -6    6.60    7.50
  -3 -14  -6    2.20    6.40
  -2 -14  -6    8.40    6.70
  -2 -14  -6   10.20    7.20
  -1 -14  -6   16.20    9.60
  -1 -14  -6    7.00    6.50
   0 -14  -6   19.90    8.90
   0 -14  -6   28.80   10.90
   1 -14  -6   36.40   13.00
   1 -14  -6   41.30   10.20
   2 -14  -6   12.90    7.70
   2 -14  -6   12.90    9.30
   3 -14  -6   11.40    6.50
   3 -14  -6   13.30   10.50
   4 -14  -6   10.20    6.50
   4 -14  -6    7.60    9.50
   5 -14  -6   21.50    7.60
   5 -14  -6   -0.30    8.70
   6 -14  -6   -5.30    4.50
   6 -14  -6  -13.00    7.40
   7 -14  -6    3.80    5.90
  -4 -15  -6   10.40    8.00
  -4 -15  -6    5.60    7.50
  -3 -15  -6    4.70    7.90
  -3 -15  -6   12.00    8.80
  -2 -15  -6    4.50    8.40
  -2 -15  -6   24.00   10.00
  -1 -15  -6   56.59   13.30
  -1 -15  -6   38.10   13.80
   0 -15  -6    1.00    7.20
   0 -15  -6    6.70    6.80
   1 -15  -6    6.20    7.00
   1 -15  -6   -4.80    7.00
   2 -15  -6    4.80    8.80
   2 -15  -6   -1.20    5.30
   3 -15  -6   -2.60    7.20
   3 -15  -6    2.90    5.60
   4 -15  -6   29.30   14.30
   4 -15  -6    0.20    5.30
   5 -15  -6    9.40   11.10
   5 -15  -6   10.40    7.20
   0 -16  -6   11.40    8.60
   1 -16  -6   -0.70    6.30
   3 -15   7    5.70    7.40
   2 -15   7   13.60    8.80
   1 -15   7   10.90    7.40
   1 -15   7   10.00    6.90
   0 -15   7   -2.60    6.10
   0 -15   7   -0.70    5.80
  -1 -15   7    5.80    6.60
  -1 -15   7   -3.00    6.10
  -2 -15   7    3.90    6.60
  -2 -15   7    1.70    6.20
  -3 -15   7   -3.60    5.60
  -3 -15   7    4.20    6.20
  -4 -15   7   -4.20    4.80
  -4 -15   7   -6.40    6.20
   5 -14   7    6.40    7.60
   4 -14   7    3.50    7.40
   3 -14   7    0.30    6.70
   2 -14   7    8.40    7.30
   2 -14   7    4.80    5.50
   1 -14   7    0.20    5.70
   1 -14   7   -0.70    4.80
   0 -14   7    3.20    6.20
   0 -14   7    4.00    6.10
  -1 -14   7    9.40    7.80
  -1 -14   7    4.10    5.80
  -2 -14   7   -1.10    6.10
  -2 -14   7    7.10    5.90
  -3 -14   7    6.50    6.40
  -3 -14   7    2.40    5.90
  -4 -14   7   11.60    7.20
  -4 -14   7    6.20    5.60
  -5 -14   7   17.80    9.90
  -6 -14   7   19.30    9.90
   7 -13   7   12.90    8.30
   6 -13   7    0.30    6.20
   5 -13   7    0.70    5.80
   4 -13   7   15.20    8.40
   3 -13   7    0.40    5.50
   2 -13   7   37.10   11.10
   2 -13   7   43.30    9.50
   1 -13   7   11.30    7.20
   1 -13   7    6.30    5.90
   0 -13   7   13.80    7.20
   0 -13   7   26.30    9.30
  -1 -13   7    9.60    5.80
  -1 -13   7   -1.90    5.60
  -2 -13   7   24.20    9.40
  -2 -13   7    8.20    6.10
  -3 -13   7    2.40    5.70
  -3 -13   7    5.40    5.90
  -4 -13   7    2.10    6.40
  -4 -13   7   15.20    6.00
  -5 -13   7    3.10    7.70
  -5 -13   7    0.10    4.20
  -6 -13   7   24.60   10.60
  -7 -13   7    5.00    9.00
  -8 -13   7   -0.70    7.70
   8 -12   7    4.30    7.00
   7 -12   7   -5.70    5.40
   6 -12   7   -0.50    5.90
   5 -12   7   -6.00    5.40
   4 -12   7   -3.20    5.30
   3 -12   7   -5.40    4.80
   3 -12   7   -5.00    3.60
   2 -12   7   -1.80    3.90
   2 -12   7    6.80    6.70
   1 -12   7   79.89   13.60
   1 -12   7  119.59   14.60
   0 -12   7   22.80    7.80
   0 -12   7   22.00    8.00
  -1 -12   7   15.70    7.80
  -1 -12   7   20.80    7.30
  -2 -12   7   78.49   12.50
  -2 -12   7   58.99   12.10
  -3 -12   7   20.20    8.60
  -3 -12   7    9.70    6.20
  -4 -12   7   10.30    7.10
  -4 -12   7   15.60    6.00
  -5 -12   7   27.90    6.90
  -5 -12   7   35.60   11.70
  -6 -12   7   -0.40    5.90
  -7 -12   7   34.80   11.80
  -8 -12   7   -3.00    7.10
  -9 -12   7   13.20    8.50
   9 -11   7    4.50    7.20
   8 -11   7    4.10    6.20
   7 -11   7   -0.10    5.20
   6 -11   7   -2.80    4.80
   5 -11   7    9.00    6.20
   4 -11   7   27.70    9.40
   3 -11   7   -2.00    3.90
   3 -11   7   -2.20    4.90
   2 -11   7   12.40    6.80
   2 -11   7   24.70    6.60
   1 -11   7   84.49   12.00
   1 -11   7   72.99   12.90
   0 -11   7   42.80    9.90
   0 -11   7   39.80    8.80
  -1 -11   7    2.50    4.50
  -1 -11   7   10.40    6.10
  -2 -11   7   91.19   14.20
  -2 -11   7   82.69   12.40
  -3 -11   7   -6.80    3.10
  -3 -11   7    6.70    5.20
  -4 -11   7   60.49    9.20
  -4 -11   7   43.70   10.60
  -5 -11   7   33.60    7.00
  -5 -11   7   44.20   11.60
  -6 -11   7    5.50    6.30
  -7 -11   7    7.00    7.60
  -8 -11   7   -0.70    6.30
  -9 -11   7    8.60    8.00
 -10 -11   7    7.70    8.60
  10 -10   7    3.70    7.70
   9 -10   7    2.40    6.90
   8 -10   7    8.60    7.00
   7 -10   7    9.90    7.10
   6 -10   7   47.50   11.60
   5 -10   7    3.50    5.40
   4 -10   7   44.80    6.20
   4 -10   7   33.00    8.90
   3 -10   7    5.20    5.90
   3 -10   7    2.10    4.00
   2 -10   7   10.40    5.90
   2 -10   7    9.40    4.40
   1 -10   7   38.80    9.20
   1 -10   7   33.40    7.30
   0 -10   7   11.40    6.20
   0 -10   7   10.20    5.60
  -1 -10   7  163.98   17.10
  -1 -10   7  151.48   16.00
  -2 -10   7    5.80    4.20
  -2 -10   7   18.60    7.20
  -3 -10   7    4.20    4.10
  -3 -10   7   -3.10    4.50
  -4 -10   7   -6.30    4.60
  -4 -10   7   -1.80    3.20
  -5 -10   7   25.60    8.50
  -5 -10   7   18.60    5.20
  -6 -10   7   -6.60    4.00
  -6 -10   7   -1.40    2.70
  -7 -10   7    6.30    7.00
  -8 -10   7    7.60    7.00
  -9 -10   7   10.70    7.70
 -10 -10   7   -3.40    7.30
  10  -9   7    7.40    7.30
   9  -9   7   16.20    7.50
   8  -9   7   17.00    8.70
   7  -9   7   32.00    9.30
   6  -9   7   27.10    9.10
   5  -9   7   68.39   13.10
   4  -9   7   38.00    5.00
   4  -9   7   35.40    9.20
   3  -9   7  230.48   21.50
   3  -9   7  208.28   12.90
   2  -9   7   33.40    8.10
   2  -9   7   44.70    7.30
   1  -9   7    1.60    3.30
   1  -9   7    9.20    4.90
   0  -9   7   62.99    9.50
   0  -9   7   64.19   10.60
  -1  -9   7   21.80    7.20
  -1  -9   7   26.60    7.00
  -2  -9   7   43.30    9.30
  -2  -9   7   38.20    7.50
  -3  -9   7    0.10    4.70
  -3  -9   7    0.70    3.50
  -4  -9   7    0.50    4.40
  -4  -9   7    2.80    3.30
  -5  -9   7   16.60    4.30
  -5  -9   7   12.20    7.10
  -6  -9   7   -5.00    3.80
  -6  -9   7    2.60    3.10
  -7  -9   7    2.80    5.30
  -8  -9   7   15.30    8.80
  -9  -9   7    1.00    5.30
 -10  -9   7   -0.20    6.40
  10   9  -7    6.80    5.60
 -11  -9   7   -0.80    7.10
  11   9  -7    7.00    6.70
  11  -8   7   -4.40    5.20
  10  -8   7   15.10    7.80
   9  -8   7  110.29   16.40
   8  -8   7   10.80    6.90
   7  -8   7  110.79   15.70
   6  -8   7  307.97   23.70
   5  -8   7   27.90    8.40
   4  -8   7   14.70    6.80
   4  -8   7   12.40    2.80
   3  -8   7   69.89    7.10
   3  -8   7   50.29    9.50
   2  -8   7   12.80    5.90
   2  -8   7   17.10    4.40
   1  -8   7   59.29    8.60
   1  -8   7   63.29    9.70
   0  -8   7  109.09   12.80
   0  -8   7  108.09   12.00
  -1  -8   7    3.70    3.90
  -1  -8   7    1.90    3.40
  -2  -8   7  186.08   17.10
  -2  -8   7  112.09   12.20
  -3  -8   7  164.98   12.90
  -3  -8   7  238.88   20.60
  -4  -8   7    8.30    5.80
  -4  -8   7    9.80    4.00
  -5  -8   7   21.80    8.30
  -5  -8   7   17.90    4.50
  -6  -8   7   12.90    6.40
  -6  -8   7    9.10    3.70
  -7  -8   7   17.60    4.60
  -7  -8   7    9.10    6.00
  -8  -8   7   11.80    8.00
  -9  -8   7   50.49   12.60
   9   8  -7   89.69   13.30
 -10  -8   7   -3.30    5.80
  10   8  -7    9.00    6.00
 -11  -8   7    6.70    8.70
  11   8  -7   16.40    7.70
 -12  -8   7    4.30    8.30
  12   8  -7    3.30    7.00
  12  -7   7    9.70    7.80
  11  -7   7   -0.60    5.70
  11  -7   7    1.50    5.70
  10  -7   7    1.90    5.50
   9  -7   7   79.89   14.20
   8  -7   7   24.30    7.80
   7  -7   7   13.20    6.60
   6  -7   7  117.49   15.30
   5  -7   7   24.60    7.90
   4  -7   7  145.89   15.70
   3  -7   7   39.30    7.70
   3  -7   7   47.60    5.10
   2  -7   7   38.90    5.60
   2  -7   7   39.80    7.90
   1  -7   7   11.80    4.80
   1  -7   7   11.00    3.80
   0  -7   7   15.20    4.80
   0  -7   7   12.80    4.60
  -1  -7   7  162.18   12.30
  -1  -7   7  134.29   13.40
  -2  -7   7   16.20    5.80
  -2  -7   7    9.10    3.50
  -3  -7   7    2.80    2.90
  -3  -7   7    0.70    3.50
  -4  -7   7   49.70    6.60
  -4  -7   7   35.80    8.70
  -5  -7   7   -2.20    3.60
  -5  -7   7    2.50    2.50
  -6  -7   7    0.40    3.00
  -6  -7   7    2.50    4.40
  -7  -7   7   44.90   10.40
  -7  -7   7   51.19    6.50
   7   7  -7   51.19    8.60
  -8  -7   7   -4.50    4.00
   8   7  -7    6.60    4.90
  -9  -7   7   -4.20    4.60
   9   7  -7   -3.60    4.00
 -10  -7   7   -2.20    5.10
  10   7  -7   -6.20    4.80
 -11  -7   7   13.60    8.50
  11   7  -7   18.60    8.00
 -12  -7   7    2.70    7.00
  12   7  -7    4.20    6.40
  12  -6   7   -0.10    6.20
  12  -6   7    1.00    6.20
  11  -6   7    5.40    5.90
  11  -6   7    8.60    6.60
  10  -6   7    2.90    5.20
  10  -6   7   -2.20    4.90
   9  -6   7   -0.70    4.70
   8  -6   7  182.18   19.60
   7  -6   7   82.99   13.10
   6  -6   7   10.50    5.50
   5  -6   7  246.58   18.00
   4  -6   7   18.00    5.90
   3  -6   7   -0.50    2.80
   3  -6   7   -2.90    1.50
  -3   6  -7    2.00    1.50
   2  -6   7   24.00    4.30
   2  -6   7   34.80    7.10
   1  -6   7  352.96   19.70
   1  -6   7  320.67   16.40
   0  -6   7  176.18   12.70
   0  -6   7  172.18   11.80
  -1  -6   7  528.25   25.80
  -1  -6   7  562.44   26.10
  -2  -6   7   46.70    7.80
  -2  -6   7   71.99    8.50
  -3  -6   7  211.08   15.80
  -3  -6   7  245.08   13.70
  -4  -6   7   23.00    6.40
  -4  -6   7   31.30    4.90
  -5  -6   7    1.80    2.80
  -5  -6   7   -0.60    3.90
  -6  -6   7   -1.90    3.90
  -6  -6   7    8.60    3.40
   6   6  -7   -1.00    3.40
  -7  -6   7   59.29   11.30
  -7  -6   7   78.89    7.60
   7   6  -7   48.20    8.70
  -8  -6   7   -2.70    4.20
   8   6  -7   -1.20    4.60
  -9  -6   7  106.19   16.70
   9   6  -7   73.89   11.90
 -10  -6   7   10.90    7.70
  10   6  -7   11.70    6.70
 -11  -6   7    0.80    6.30
  11   6  -7    1.60    5.60
 -12  -6   7    7.80    8.10
  12   6  -7   -0.10    6.80
  13   6  -7   -4.50    6.00
  12  -5   7   -4.90    5.30
  12  -5   7    0.40    6.50
  11  -5   7   14.30    7.10
  11  -5   7   26.70    8.90
  10  -5   7   45.50    9.80
  10  -5   7   29.20    9.20
   9  -5   7   22.10    8.80
   9  -5   7   17.20    6.50
   8  -5   7   18.40    6.90
   7  -5   7   -2.40    3.70
   6  -5   7   26.30    7.40
   5  -5   7  248.38   17.60
   4  -5   7   -1.00    3.00
   3  -5   7    0.70    1.40
   3  -5   7   -0.10    3.10
  -3   5  -7   -0.80    1.20
   2  -5   7  108.09   11.40
   2  -5   7   90.29    6.60
   1  -5   7  147.59    9.60
   1  -5   7  173.38   12.40
   0  -5   7  102.09    9.50
   0  -5   7  122.79   11.50
  -1  -5   7  421.46   20.40
  -1  -5   7  383.96   20.00
  -2  -5   7   31.20    5.30
  -2  -5   7   48.20    7.60
  -3  -5   7  443.76   20.80
  -3  -5   7  458.75   24.00
  -4  -5   7   19.40    4.20
  -4  -5   7   36.50    7.60
  -5  -5   7   25.60    4.90
  -5  -5   7   21.90    6.40
   5   5  -7   36.00    6.30
  -6  -5   7   70.49    7.80
  -6  -5   7   74.29   12.00
   6   5  -7   69.49    9.40
  -7  -5   7   81.79    8.00
  -7  -5   7   56.59   10.70
   7   5  -7   88.79   11.30
  -8  -5   7   26.40    9.50
   8   5  -7   20.70    6.50
  -9  -5   7   50.69   11.80
   9   5  -7   32.60    8.80
 -10  -5   7    6.70    6.40
  10   5  -7   -0.20    5.30
 -11  -5   7    6.30    7.30
  11   5  -7   10.10    6.80
 -12  -5   7   -0.90    5.90
  12   5  -7    3.50    6.70
 -13  -5   7   15.10    9.50
  13   5  -7    1.30    7.10
  12  -4   7    3.30    6.50
  12  -4   7   -2.00    5.20
  11  -4   7   22.60    8.50
  11  -4   7   12.90    6.80
  10  -4   7   -2.20    3.80
  10  -4   7   -5.20    4.10
   9  -4   7  215.08   21.70
   9  -4   7  218.48   19.70
   8  -4   7   19.30    7.00
   8  -4   7   20.20    6.60
   7  -4   7  348.97   21.60
   6  -4   7   -2.60    2.60
   5  -4   7   10.30    3.70
   4  -4   7  154.28   14.40
   3  -4   7  253.67   15.60
  -3   4  -7  227.48    9.90
   2  -4   7  220.38   10.90
   2  -4   7  281.77   15.80
  -2   4  -7  220.18   11.10
   1  -4   7  169.58   11.80
   1  -4   7  181.08   10.00
   0  -4   7    8.40    3.20
   0  -4   7    3.80    2.60
  -1  -4   7 1157.58   45.30
  -1  -4   7 1136.19   44.80
  -2  -4   7  168.98   10.60
  -2  -4   7  153.88   11.60
  -3  -4   7  241.68   13.30
  -3  -4   7  227.08   15.00
  -4  -4   7  198.68   14.20
  -4  -4   7  172.88   11.20
   4   4  -7  181.18   10.60
  -5  -4   7    5.10    4.60
  -5  -4   7    6.20    3.00
   5   4  -7    3.20    3.20
  -6  -4   7  239.38   18.00
  -6  -4   7  216.58   13.10
   6   4  -7  232.88   14.40
  -7  -4   7   35.00    9.10
   7   4  -7   23.00    6.00
  -8  -4   7   -4.00    4.10
   8   4  -7   -4.40    3.20
  -9  -4   7    6.80    6.60
   9   4  -7    5.00    5.30
 -10  -4   7    6.70    5.90
  10   4  -7   -1.50    4.90
 -11  -4   7    6.20    6.90
  11   4  -7    8.80    6.40
 -12  -4   7   10.30    7.30
  12   4  -7    6.90    6.40
 -13  -4   7   -5.60    4.70
  13   4  -7    5.70    7.00
  13  -3   7   -0.30    7.30
  12  -3   7   -2.10    4.40
  12  -3   7    1.70    5.90
  11  -3   7    3.40    4.90
  11  -3   7   -0.40    4.70
  10  -3   7    0.80    5.00
  10  -3   7    3.60    4.90
   9  -3   7   60.29   10.10
   9  -3   7   69.79   12.20
   8  -3   7   30.50    7.40
   8  -3   7   19.60    6.80
   7  -3   7    4.30    4.70
   7  -3   7    2.40    3.70
   6  -3   7    0.10    3.00
   5  -3   7    2.70    2.90
   4  -3   7    5.20    3.50
   3  -3   7    8.00    3.60
  -3   3  -7   15.70    2.50
  -3   3  -7   13.40    1.80
   2  -3   7   42.50    6.30
   2  -3   7   68.29    4.90
  -2   3  -7   72.99    6.00
   1  -3   7  494.15   22.80
   1  -3   7  474.95   20.10
   0  -3   7  242.68   13.00
   0  -3   7  260.37   14.20
  -1  -3   7  136.89    9.90
  -1  -3   7  164.98   10.10
  -2  -3   7  926.21   38.20
  -2  -3   7  950.00   37.60
  -2  -3   7  924.71   34.60
  -3  -3   7  273.57   16.30
  -3  -3   7  270.37   14.70
  -4  -3   7  900.01   37.30
  -4  -3   7  943.41   40.10
   4   3  -7  919.61   35.70
  -5  -3   7  480.45   22.30
  -5  -3   7  507.05   26.10
   5   3  -7  463.15   21.80
  -6  -3   7   51.09    9.10
  -6  -3   7   60.59    7.60
   6   3  -7   53.59    7.50
  -7  -3   7    9.90    5.00
   7   3  -7    3.50    3.80
  -8  -3   7   96.19   13.90
   8   3  -7   91.69   11.70
  -9  -3   7   25.50    8.70
   9   3  -7   22.40    7.00
 -10  -3   7   13.60    7.40
  10   3  -7    8.60    6.30
 -11  -3   7    7.00    7.40
  11   3  -7   17.40    7.90
 -12  -3   7   18.00    8.20
  12   3  -7   20.30    8.50
 -13  -3   7    2.00    6.30
  13   3  -7    1.60    7.20
  13  -2   7   -7.30    5.90
  12  -2   7   60.09   10.40
  12  -2   7   41.50   12.20
  11  -2   7   21.20    6.30
  11  -2   7   14.70    8.50
  10  -2   7   44.40   11.10
   9  -2   7   40.10    9.80
   9  -2   7   36.80    7.80
  -9   2  -7   64.29    7.30
   8  -2   7   17.30    6.90
   8  -2   7   18.40    6.30
  -8   2  -7   40.30    5.10
   7  -2   7   49.40    8.20
   7  -2   7   54.89   10.00
  -7   2  -7   43.90    5.10
   6  -2   7   14.20    4.80
   6  -2   7   22.30    5.90
   6  -2   7   22.00    2.80
  -6   2  -7   25.40    3.40
   5  -2   7    8.20    3.90
   5  -2   7   14.30    4.60
  -5   2  -7   11.20    2.40
  -5   2  -7   15.30    2.50
   4  -2   7   -0.10    2.60
   4  -2   7   -0.90    2.10
  -4   2  -7    0.30    1.40
  -4   2  -7    0.10    1.10
   3  -2   7  184.68   11.90
  -3   2  -7  188.28    8.30
  -3   2  -7  183.98    9.10
   2  -2   7  145.59    9.90
  -2   2  -7  133.19    6.80
   1  -2   7    0.80    1.60
   1  -2   7    0.20    1.90
   0  -2   7  244.28   12.90
   0  -2   7  256.07   13.80
  -1  -2   7  376.66   18.20
  -1  -2   7  382.26   18.40
  -2  -2   7  531.55   20.20
  -2  -2   7  545.85   24.20
  -2  -2   7  542.15   24.40
  -3  -2   7 1045.40   39.10
  -3  -2   7 1112.79   43.60
   3   2  -7 1059.99   38.90
  -4  -2   7  252.87   15.70
  -4  -2   7  246.78   14.10
   4   2  -7  233.48   12.00
  -5  -2   7   10.70    4.50
  -5  -2   7   16.30    4.30
   5   2  -7   10.30    3.40
  -6  -2   7   29.20    7.10
   6   2  -7   24.20    5.20
  -7  -2   7   -0.80    3.80
   7   2  -7    6.70    4.20
  -8  -2   7   14.10    6.70
   8   2  -7    9.10    5.20
  -9  -2   7   34.70    9.60
   9   2  -7   41.90    9.00
 -10  -2   7  139.99   17.80
  10   2  -7  121.59   15.40
  10   2  -7  134.39   11.80
 -11  -2   7   31.60   10.10
  11   2  -7   24.30    8.80
 -12  -2   7    4.70    5.90
  12   2  -7   -5.30    5.00
 -13  -2   7   -0.50    6.00
  13   2  -7    1.80    7.10
  13  -1   7   65.09   15.90
  12  -1   7   -4.80    6.10
  11  -1   7   28.10    7.60
  11  -1   7   17.10    8.20
  10  -1   7    1.00    3.70
  10  -1   7   -3.10    5.60
   9  -1   7   -0.90    3.60
   9  -1   7    3.10    5.50
  -9   1  -7    2.30    3.70
   8  -1   7    0.90    3.30
   8  -1   7   -4.90    4.30
  -8   1  -7   -0.70    2.60
   7  -1   7   77.69   11.60
   7  -1   7   83.69    9.70
  -7   1  -7   99.19    8.80
   6  -1   7    1.10    2.70
   6  -1   7   -2.50    2.50
  -6   1  -7   -2.50    1.60
   5  -1   7   11.90    3.90
   5  -1   7    6.00    3.70
  -5   1  -7   17.00    3.10
   4  -1   7  315.97   16.80
   4  -1   7  299.47   17.10
  -4   1  -7  311.67   13.60
   3  -1   7   57.59    7.00
   3  -1   7   54.49    7.20
  -3   1  -7   62.09    4.40
   2  -1   7   -1.40    1.30
   2  -1   7    4.10    1.90
  -2   1  -7   -0.60    0.90
   1  -1   7  249.97   12.00
   1  -1   7  253.27   13.90
   1  -1   7  259.27   11.70
   0  -1   7  411.36   20.40
   0  -1   7  452.35   16.90
   0  -1   7  458.95   19.40
  -1  -1   7  366.66   18.20
  -1  -1   7  363.46   17.50
  -2  -1   7    1.30    2.00
  -2  -1   7   -0.90    1.80
  -3  -1   7    7.20    3.30
  -3  -1   7    5.00    2.90
   3   1  -7    8.60    1.90
  -4  -1   7 1412.46   55.79
  -4  -1   7 1476.55   56.49
   4   1  -7 1403.56   52.29
  -5  -1   7  205.28   17.70
  -5  -1   7  201.88   13.20
   5   1  -7  190.78   11.50
  -6  -1   7  124.69   13.50
   6   1  -7  129.49   11.50
  -7  -1   7   -2.20    3.30
   7   1  -7    0.20    3.10
  -8  -1   7   67.09   11.10
   8   1  -7   83.29   11.00
  -9  -1   7   14.10    7.00
   9   1  -7   10.10    5.80
 -10  -1   7   67.69   12.70
  10   1  -7  108.29   14.70
 -11  -1   7   34.30    9.80
  11   1  -7   23.40    9.10
 -12  -1   7   -0.20    4.60
  12   1  -7   -3.40    6.10
 -13  -1   7   20.60    8.70
  13   1  -7   26.00   10.30
  14   1  -7    1.40    7.40
  13   0   7    4.20    8.20
  12   0   7    0.80    5.60
  11   0   7  110.69   12.80
  11   0   7  100.09   17.40
  10   0   7   -0.30    3.50
  10   0   7    0.70    5.70
 -10   0  -7   -1.40    4.00
   9   0   7  251.27   15.70
   9   0   7  214.08   22.70
  -9   0  -7  210.58   14.80
   8   0   7    1.60    3.10
   8   0   7    2.60    4.70
  -8   0  -7   -4.20    2.20
   7   0   7  247.08   18.40
   7   0   7  256.27   15.50
  -7   0  -7  255.77   14.60
   6   0   7    0.00    2.10
   6   0   7    0.10    3.00
  -6   0  -7    3.10    2.20
   5   0   7    9.20    4.00
   5   0   7    7.50    3.20
  -5   0  -7    9.00    3.00
   4   0   7   -2.70    1.90
   4   0   7    3.50    2.50
  -4   0  -7    0.70    1.50
   3   0   7    8.20    2.90
  -3   0  -7    5.30    1.90
   2   0   7    0.40    2.10
   2   0   7   -0.80    1.30
  -2   0  -7   -1.30    0.90
   1   0   7   83.79    5.70
   1   0   7   90.99    9.30
   0   0   7   -0.20    0.90
   0   0   7    2.10    2.50
   0   0   7   -1.60    1.20
  -1   0   7  244.88   13.40
  -1   0   7  271.87   15.00
  -2   0   7   -4.10    1.40
  -2   0   7    0.90    2.40
   2   0  -7    0.10    0.60
  -3   0   7   33.70    6.30
  -3   0   7   32.10    6.20
   3   0  -7   41.40    3.70
  -4   0   7    2.10    1.80
  -4   0   7   -5.60    2.00
   4   0  -7   -1.50    1.50
  -5   0   7   61.39    8.80
   5   0  -7   41.70    5.60
  -6   0   7   -1.00    3.10
   6   0  -7   -0.40    2.40
  -7   0   7    7.90    4.60
   7   0  -7    4.40    3.50
  -8   0   7   -6.20    3.20
   8   0  -7   -3.80    3.00
  -9   0   7    6.30    5.20
   9   0  -7    4.50    4.80
 -10   0   7   14.30    6.80
  10   0  -7    5.70    6.20
 -11   0   7   11.90    6.80
  11   0  -7   29.60    8.90
  11   0  -7   28.60    7.50
 -12   0   7    1.30    5.50
  12   0  -7   -6.80    4.90
 -13   0   7    0.00    5.50
  13   0  -7    0.90    6.20
  14   0  -7  -14.30    5.20
  13   1   7   53.99   15.10
  12   1   7   -9.80    5.90
  11   1   7   28.20    7.40
  11   1   7   25.90   10.00
 -11  -1  -7   34.90    8.50
  10   1   7    4.10    4.20
  10   1   7    2.60    5.80
 -10  -1  -7   -0.90    4.20
   9   1   7   -1.60    3.70
   9   1   7    2.40    4.10
  -9  -1  -7    3.90    3.80
   8   1   7    2.10    3.50
   8   1   7   -2.60    4.90
  -8  -1  -7    1.90    2.90
   7   1   7   82.89   12.40
   7   1   7   97.09   10.40
  -7  -1  -7   97.69   10.60
   6   1   7   -4.40    2.80
   6   1   7   -2.40    2.10
  -6  -1  -7    0.20    2.10
   5   1   7   11.60    4.80
   5   1   7   12.40    3.90
  -5  -1  -7   15.80    4.10
   4   1   7  288.37   16.90
   4   1   7  288.97   16.10
  -4  -1  -7  292.67   14.50
   3   1   7   63.39    7.70
   3   1   7   53.59    7.00
  -3  -1  -7   59.49    6.30
   2   1   7    4.10    2.70
   2   1   7    1.40    1.60
  -2  -1  -7   -0.20    1.00
   1   1   7  272.87   15.10
   1   1   7  262.57   12.30
  -1  -1  -7  257.47   12.40
   0   1   7  484.05   22.40
   0   1   7  469.95   17.80
   0  -1  -7  456.15   19.00
   0  -1  -7  420.86   17.80
  -1   1   7  384.46   17.40
  -1   1   7  349.57   18.80
   1  -1  -7  364.86   14.10
  -2   1   7    2.70    2.70
  -2   1   7   -1.30    1.80
  -3   1   7   12.50    3.80
  -3   1   7    7.10    3.40
  -4   1   7 1387.56   54.49
  -5   1   7  185.98   13.70
  -6   1   7  157.98   15.80
   6  -1  -7  134.59   10.40
  -7   1   7   -2.80    3.00
   7  -1  -7   -0.20    2.40
  -8   1   7   65.69   10.40
   8  -1  -7   80.19   10.70
  -9   1   7    6.60    5.10
   9  -1  -7   18.80    6.60
 -10   1   7  125.89   16.50
  10  -1  -7   94.89   13.80
 -11   1   7   25.90    8.00
  11  -1  -7   19.60    7.20
  11  -1  -7   12.50    7.20
 -12   1   7    1.00    5.00
  12  -1  -7   -5.10    5.00
 -13   1   7   25.30    8.70
  13  -1  -7   12.20    8.50
  14  -1  -7    4.70    7.60
  13   2   7   -6.50    6.30
  12   2   7   67.09   15.30
  11   2   7    9.50    7.80
 -11  -2  -7   16.20    6.80
  10   2   7   48.60    8.30
  10   2   7   18.50    8.50
 -10  -2  -7   35.90    8.20
   9   2   7   64.29   12.50
   9   2   7   52.59    8.40
  -9  -2  -7   53.09    9.30
   8   2   7   30.10    9.00
   8   2   7   44.20    7.40
  -8  -2  -7   23.40    6.20
   7   2   7   48.00    7.40
   7   2   7   36.90    9.00
  -7  -2  -7   53.49    8.60
   6   2   7   18.00    6.20
   6   2   7   13.10    4.50
  -6  -2  -7    5.40    3.80
   5   2   7   13.50    4.80
   5   2   7   12.60    4.30
  -5  -2  -7    9.70    3.80
   4   2   7    2.20    2.70
   4   2   7    2.80    2.80
  -4  -2  -7    0.20    1.10
   3   2   7  202.38   12.60
   3   2   7  187.08   12.50
  -3  -2  -7  189.98   11.30
   2   2   7  128.09   11.60
  -2  -2  -7  119.59    8.20
   1   2   7    1.10    1.80
   1   2   7   -2.90    1.80
  -1  -2  -7   -2.00    1.30
   0   2   7  260.67   15.40
   0  -2  -7  224.68   11.90
  -1   2   7  425.66   21.40
   1  -2  -7  402.76   16.30
   1  -2  -7  388.56   17.80
  -2   2   7  546.65   26.70
  -2   2   7  554.34   24.30
  -3   2   7  988.30   40.00
  -4   2   7  252.67   15.50
  -5   2   7    9.40    4.30
  -6   2   7   36.70    7.40
  -7   2   7   -1.20    3.00
  -8   2   7   22.10    7.10
   8  -2  -7   31.60    7.10
  -9   2   7   41.70    9.50
   9  -2  -7   41.30    9.00
 -10   2   7  109.29   15.10
  10  -2  -7  124.89   15.80
 -11   2   7   37.80   10.10
  11  -2  -7   34.30    9.10
  11  -2  -7   38.90    9.80
 -12   2   7   -2.00    4.70
  12  -2  -7    3.20    6.10
  12  -2  -7    1.20    5.30
 -13   2   7    0.00    3.30
  13  -2  -7    0.20    6.30
  13   3   7   15.20    9.40
  12   3   7   -2.50    5.50
 -12  -3  -7    2.40    5.90
  11   3   7    2.80    5.80
 -11  -3  -7    1.60    5.20
  10   3   7    9.10    6.30
 -10  -3  -7   -2.30    3.80
   9   3   7   63.19   12.40
   9   3   7   77.49   10.00
  -9  -3  -7   79.29   11.80
   8   3   7   25.20    8.10
   8   3   7   24.10    6.30
  -8  -3  -7   18.50    6.50
   7   3   7    0.30    3.60
   7   3   7    2.60    4.90
  -7  -3  -7   -0.20    2.50
   6   3   7    6.10    3.80
   6   3   7    0.80    3.90
  -6  -3  -7    1.60    2.20
   5   3   7    3.80    3.80
   5   3   7    0.30    2.70
  -5  -3  -7    0.10    2.80
   4   3   7    9.20    4.00
   4   3   7    6.20    3.70
  -4  -3  -7   10.60    3.70
   3   3   7    8.30    3.70
   3   3   7   12.40    4.00
  -3  -3  -7    7.30    3.10
   2   3   7   56.69    7.90
   2   3   7   63.59    7.40
  -2  -3  -7   50.09    6.50
   1   3   7  526.65   25.00
  -1  -3  -7  463.15   21.30
   0   3   7  222.28   15.20
   0  -3  -7  248.48   12.80
   1  -3  -7  168.08   10.20
   2  -3  -7  996.90   38.50
  -3   3   7  280.07   15.70
  -4   3   7  914.91   38.20
  -5   3   7  493.45   24.60
  -6   3   7   58.09    8.90
  -7   3   7   10.70    4.90
  -8   3   7   81.69   11.50
  -9   3   7   25.60    7.20
   9  -3  -7   28.40    7.50
 -10   3   7   12.60    5.80
  10  -3  -7   20.60    7.90
  10  -3  -7   30.70    8.80
 -11   3   7    7.20    4.80
  11  -3  -7   16.60    7.90
  11  -3  -7   12.70    6.90
 -12   3   7    9.90    5.50
  12  -3  -7   13.60    7.70
  12  -3  -7   24.20    8.90
 -13   3   7   -1.80    4.70
  13  -3  -7   -7.60    4.80
  12   4   7   -7.50    4.00
 -12  -4  -7   -1.80    5.70
  11   4   7   40.70   12.20
 -11  -4  -7    7.30    5.60
  10   4   7   -2.20    4.30
 -10  -4  -7   -2.00    4.50
   9   4   7  238.48   15.70
   9   4   7  190.28   21.50
   8   4   7   26.20    6.20
   8   4   7   16.70    7.00
  -8  -4  -7   11.00    5.60
   7   4   7  283.57   20.70
   7   4   7  291.47   17.80
  -7  -4  -7  323.07   20.30
   6   4   7    0.00    4.00
   6   4   7    4.00    3.80
  -6  -4  -7    2.70    3.30
   5   4   7    2.50    3.50
   5   4   7    6.60    3.60
  -5  -4  -7   -0.90    2.50
   4   4   7  133.19   13.40
   4   4   7  110.09   11.70
  -4  -4  -7  146.39   13.30
   3   4   7  226.18   14.30
   3   4   7  235.48   15.10
  -3  -4  -7  197.18   13.10
   2   4   7  233.28   13.90
   2   4   7  236.28   15.80
  -2  -4  -7  241.08   14.10
   1   4   7  179.28   13.60
  -1  -4  -7  175.08   11.30
   0  -4  -7   -0.70    2.10
   1  -4  -7 1196.88   45.60
   2  -4  -7  170.78   10.60
   3  -4  -7  246.08   13.60
   4  -4  -7  204.68   12.50
  -5   4   7    3.40    3.30
  -6   4   7  242.38   15.70
  -7   4   7   22.90    6.10
  -8   4   7   -6.10    2.70
  -9   4   7    6.00    4.70
 -10   4   7   -0.20    2.30
  10  -4  -7    3.60    5.20
  10  -4  -7    5.00    5.70
 -11   4   7   15.30    6.50
  11  -4  -7   13.60    7.00
  11  -4  -7   14.70    7.50
 -12   4   7    4.10    5.30
  12  -4  -7    8.20    7.10
  12  -4  -7    8.40    7.30
 -13   4   7    2.50    4.80
  13  -4  -7   -4.10    5.70
  13  -4  -7   -5.80    5.40
  12   5   7    0.60    6.10
 -12  -5  -7    0.10    6.80
  11   5   7   21.50    9.80
 -11  -5  -7    4.30    4.30
  10   5   7   23.00    8.90
 -10  -5  -7   33.90    9.60
   9   5   7   31.60    9.60
  -9  -5  -7   19.00    7.90
   8   5   7   11.90    6.60
   8   5   7   14.50    5.20
  -8  -5  -7   18.80    7.20
   7   5   7    4.60    5.40
   7   5   7   -1.60    3.50
  -7  -5  -7   -4.40    3.20
   6   5   7   23.70    6.50
   6   5   7   24.00    7.40
  -6  -5  -7   40.10    8.30
   5   5   7  225.48   19.60
   5   5   7  213.88   15.30
  -5  -5  -7  208.08   18.60
   4   5   7   -1.20    2.70
   4   5   7    1.60    3.40
  -4  -5  -7    4.10    3.30
   3   5   7    1.10    3.40
  -3  -5  -7   -0.20    2.40
  -2  -5  -7   99.19   10.80
  -1  -5  -7  172.18   12.00
   0  -5  -7  110.19   10.30
   1  -5  -7  354.06   17.90
   2  -5  -7   25.80    5.20
   3  -5  -7  491.35   22.60
   4  -5  -7   28.60    5.20
   5  -5  -7   31.10    5.50
   6  -5  -7   71.29    8.90
  -7   5   7   77.89   10.10
  -8   5   7   37.00    7.90
  -9   5   7   -1.10    2.10
 -10   5   7    9.40    5.60
  10  -5  -7    6.70    6.50
 -11   5   7    4.70    4.80
  11  -5  -7   10.20    7.30
 -12   5   7   -3.40    3.90
  12  -5  -7    3.20    6.30
  12  -5  -7    3.60    6.10
 -13   5   7   -4.40    4.10
  13  -5  -7    8.20    7.50
  13  -5  -7   -3.00    5.50
  12   6   7   -0.10    6.70
 -12  -6  -7   -4.00    5.90
  11   6   7    4.40    7.00
 -11  -6  -7   -3.10    5.10
  10   6   7   -7.70    4.60
 -10  -6  -7    1.50    4.60
   9   6   7   -3.60    4.60
  -9  -6  -7   -1.70    4.30
   8   6   7  155.28   18.90
  -8  -6  -7  153.78   18.30
   7   6   7   72.39   12.60
  -7  -6  -7   80.69   12.80
   6   6   7    9.70    5.90
  -6  -6  -7    6.50    4.20
   5   6   7  214.88   16.80
  -5  -6  -7  251.37   17.70
   4   6   7   15.60    5.60
  -4  -6  -7   15.90    5.80
   3   6   7    1.20    2.70
  -3  -6  -7    2.90    2.90
  -2  -6  -7   27.60    6.30
  -1  -6  -7  297.77   17.40
   0  -6  -7  163.48   11.90
   1  -6  -7  524.65   24.60
   2  -6  -7   72.89    8.60
   3  -6  -7  220.28   13.50
   4  -6  -7   29.80    5.80
   5  -6  -7    3.20    3.20
   6  -6  -7    6.50    3.60
   7  -6  -7   62.29    8.40
   8  -6  -7   -3.10    2.80
   9  -6  -7  103.09   11.90
  10  -6  -7   10.50    5.30
  10  -6  -7    8.20    7.30
  11  -6  -7    4.40    6.90
  11  -6  -7    1.00    4.30
  12  -6  -7    6.30    7.70
  12  -6  -7   14.70    7.30
  12  -6  -7    0.40    4.90
  13  -6  -7    0.00    6.60
  12   7   7    7.80    7.70
  11   7   7  -12.90    4.40
 -11  -7  -7   -6.50    5.20
  10   7   7    2.70    6.40
 -10  -7  -7    1.40    5.90
   9   7   7   38.60   10.00
  -9  -7  -7   48.90   11.10
   8   7   7   27.60    9.10
  -8  -7  -7   28.10    9.30
   7   7   7   11.40    6.70
  -7  -7  -7   28.00    8.70
   6   7   7  104.59   14.90
  -6  -7  -7  109.99   14.60
   5   7   7   16.20    6.10
  -5  -7  -7    7.10    5.00
   4   7   7  145.09   15.40
  -4  -7  -7  124.79   15.30
  -3  -7  -7   45.10    8.40
  -2  -7  -7   27.30    6.50
  -1  -7  -7    7.80    4.20
   0  -7  -7   16.60    5.10
   1  -7  -7  156.18   14.10
   2  -7  -7   17.00    4.70
   3  -7  -7   -0.20    2.40
   4  -7  -7   52.89    7.80
   5  -7  -7    0.10    2.40
   6  -7  -7   -1.20    2.80
   7  -7  -7   60.79    8.60
   8  -7  -7    1.80    3.50
   9  -7  -7    2.40    3.90
   9  -7  -7   -1.00    5.30
  10  -7  -7    2.90    4.00
  10  -7  -7    0.50    6.10
  11  -7  -7   19.10   10.20
  11  -7  -7   21.30    6.00
  12  -7  -7   -4.70    4.10
  12  -7  -7    2.90    6.90
  11   8   7   10.00    8.30
 -11  -8  -7   21.40    9.20
  10   8   7   13.60    8.00
 -10  -8  -7    4.10    6.30
   9   8   7   69.89   13.40
  -9  -8  -7   64.99   13.90
   8   8   7    7.00    6.10
  -8  -8  -7   12.30    8.20
   7   8   7  103.69   15.50
  -7  -8  -7   78.99   14.40
   6   8   7  284.87   21.30
  -6  -8  -7  237.68   24.00
   5   8   7   15.60    6.80
  -5  -8  -7   12.50    6.60
  -4  -8  -7   15.20    6.20
  -3  -8  -7   61.99   10.60
  -2  -8  -7    5.60    4.20
  -1  -8  -7   74.29   10.80
   0  -8  -7   95.69   11.80
   1  -8  -7    0.20    3.20
   2  -8  -7  139.39   13.50
   3  -8  -7  204.58   14.20
   4  -8  -7   12.00    4.60
   5  -8  -7   17.90    5.30
   6  -8  -7    4.40    3.90
   7  -8  -7    5.10    4.00
   8  -8  -7   20.20    5.90
   9  -8  -7   51.89    8.50
   9  -8  -7   41.60   12.10
  10  -8  -7   -4.80    6.10
  10  -8  -7    6.10    4.70
  11  -8  -7   28.40   12.40
  11  -8  -7    7.70    5.10
  12  -8  -7    7.20    8.60
  10   9   7   13.60    9.30
 -10  -9  -7   -8.30    5.80
   9   9   7    6.60    7.20
  -9  -9  -7    4.30    7.70
   8   9   7   15.00    7.90
  -8  -9  -7   21.40    8.20
   7   9   7   32.60    9.80
  -7  -9  -7   22.10    8.40
   6   9   7   32.80    9.00
  -6  -9  -7   20.80    8.20
  -5  -9  -7   88.49   14.00
  -4  -9  -7   31.10    8.80
  -3  -9  -7  201.88   20.30
  -2  -9  -7   33.90    8.10
  -1  -9  -7   -6.10    2.70
   0  -9  -7   76.09   11.20
   1  -9  -7   16.10    5.90
   2  -9  -7   56.59    9.30
   3  -9  -7    0.30    3.60
   4  -9  -7    4.00    4.10
   5  -9  -7    9.50    4.70
   6  -9  -7   -3.40    3.00
   7  -9  -7   -0.30    3.90
   8  -9  -7    7.50    4.70
   8  -9  -7   -5.30    5.60
   9  -9  -7    3.90    7.50
   9  -9  -7    6.60    4.40
  10  -9  -7    0.10    3.70
  10  -9  -7   10.20    9.50
  11  -9  -7   -5.10    6.20
  11  -9  -7   -1.20    4.40
  10  10   7    4.90    6.50
 -10 -10  -7    6.90    8.10
   9  10   7    4.60    7.30
  -9 -10  -7    8.80    8.30
   8  10   7    6.00    6.30
  -8 -10  -7    3.60    6.40
  -7 -10  -7    2.60    5.50
  -6 -10  -7   18.80    7.50
  -5 -10  -7   -1.10    3.90
  -4 -10  -7   36.60    9.80
  -3 -10  -7    5.50    5.80
  -2 -10  -7    3.10    4.30
  -1 -10  -7   31.40    7.80
   0 -10  -7   14.00    6.40
   1 -10  -7  164.68   17.40
   2 -10  -7   15.30    6.00
   3 -10  -7   -4.70    3.60
   4 -10  -7    9.00    5.00
   5 -10  -7   11.40    5.00
   6 -10  -7    3.40    3.70
   7 -10  -7   30.20   11.30
   7 -10  -7   26.50    6.70
   8 -10  -7    5.80    8.60
   8 -10  -7    3.10    3.80
   9 -10  -7    3.60    8.80
   9 -10  -7   17.00    5.90
  10 -10  -7    6.30    8.50
  10 -10  -7   -0.40    4.70
  -9 -11  -7    0.40    6.70
  -8 -11  -7    3.10    6.20
  -7 -11  -7   -3.30    4.60
  -6 -11  -7    9.40    7.30
  -5 -11  -7    0.90    5.20
  -4 -11  -7    8.20    6.00
  -3 -11  -7   -6.60    4.40
  -2 -11  -7   23.20    7.70
  -1 -11  -7   60.99   11.30
   0 -11  -7   26.80    7.80
   1 -11  -7    9.30    5.80
   2 -11  -7   63.69   11.10
   3 -11  -7    3.90    4.90
   4 -11  -7   70.79   11.10
   5 -11  -7   24.20    7.10
   6 -11  -7    5.80    4.70
   6 -11  -7   11.00    9.00
   7 -11  -7   12.40    8.70
   7 -11  -7   23.50    7.00
   8 -11  -7    6.50    8.50
   8 -11  -7    0.80    4.20
   9 -11  -7   -1.70    7.00
   9 -11  -7    2.30    4.90
  10 -11  -7   -1.20    8.20
  -8 -12  -7   14.40    9.40
  -7 -12  -7    5.40    7.20
  -6 -12  -7    1.80    6.50
  -5 -12  -7   -3.90    6.00
  -4 -12  -7    7.40    5.90
  -3 -12  -7   -5.20    4.60
  -2 -12  -7    4.10    6.10
  -1 -12  -7   98.99   15.40
   0 -12  -7   17.80    7.70
   1 -12  -7   33.00    8.90
   2 -12  -7   64.39   11.40
   3 -12  -7   15.60    7.00
   4 -12  -7   11.00    6.60
   5 -12  -7   22.70   11.50
   5 -12  -7   26.80    7.60
   6 -12  -7    8.00    5.40
   6 -12  -7    9.20    9.50
   7 -12  -7   25.00   12.10
   7 -12  -7   27.60    7.60
   8 -12  -7    0.20    4.70
   8 -12  -7    5.90    9.20
   9 -12  -7   18.60   11.80
   9 -12  -7   17.90    7.00
  -7 -13  -7   17.70   10.30
  -6 -13  -7   -4.80    5.80
  -5 -13  -7    2.00    5.60
  -5 -13  -7    2.20    5.90
  -4 -13  -7   25.30    9.70
  -3 -13  -7    1.50    5.80
  -2 -13  -7   55.29   13.00
  -1 -13  -7    5.10    6.60
   0 -13  -7   15.90    8.00
   1 -13  -7    3.50    5.60
   2 -13  -7   21.50    8.40
   3 -13  -7    2.20    5.20
   3 -13  -7   -1.30    8.50
   4 -13  -7    3.50    7.30
   4 -13  -7   13.50    6.80
   5 -13  -7    4.80    8.00
   5 -13  -7   -5.10    4.80
   6 -13  -7   23.10   11.00
   6 -13  -7   13.70    6.70
   7 -13  -7   12.40    7.20
   7 -13  -7   10.10   10.40
   8 -13  -7    6.90    6.60
   8 -13  -7    8.10   10.30
  -5 -14  -7   10.90    8.70
  -4 -14  -7   -0.80    5.90
  -4 -14  -7   -2.80    5.90
  -3 -14  -7    5.20    6.00
  -3 -14  -7   -0.50    5.50
  -2 -14  -7   15.90    8.80
  -2 -14  -7    0.10    6.40
  -1 -14  -7   -0.20    7.20
  -1 -14  -7   10.80    7.90
   0 -14  -7   12.00    8.70
   0 -14  -7    4.40    5.80
   1 -14  -7   -1.90    5.90
   1 -14  -7   14.70    9.10
   2 -14  -7    0.50    5.00
   2 -14  -7    2.10    7.80
   3 -14  -7   11.70    6.70
   3 -14  -7   -6.00    5.60
   4 -14  -7   -1.00    5.00
   4 -14  -7    9.30    9.40
   5 -14  -7    4.50    6.10
   5 -14  -7   14.80    9.90
   6 -14  -7    8.30    6.50
   6 -14  -7    3.40    9.10
   7 -14  -7   22.10    7.90
  -4 -15  -7   12.10    8.80
  -3 -15  -7   -1.40    6.50
  -3 -15  -7   -4.10    7.60
  -2 -15  -7    4.10    6.00
  -2 -15  -7   -1.90    7.80
  -1 -15  -7    5.80    8.10
  -1 -15  -7    6.80    8.70
   0 -15  -7   -0.70    7.80
   0 -15  -7   -3.40    6.00
   1 -15  -7    1.60    5.80
   1 -15  -7    5.60    9.10
   2 -15  -7    3.60    5.50
   2 -15  -7   -0.40    8.30
   3 -15  -7   -1.30    8.50
   3 -15  -7   -2.70    4.50
   4 -15  -7   -0.10    5.30
   4 -15  -7    2.00    9.50
   5 -15  -7    0.20    5.10
   3 -15   8    4.30    5.90
   2 -15   8   -1.70    5.00
   1 -15   8   11.50    8.20
   0 -15   8    3.10    6.90
   0 -15   8   -5.40    5.80
  -1 -15   8   -0.10    5.70
  -1 -15   8   -1.60    6.20
  -2 -15   8    4.40    6.70
  -2 -15   8   11.00    8.20
  -3 -15   8    8.80    7.20
  -3 -15   8    5.20    7.50
   5 -14   8    5.70    8.00
   4 -14   8   -5.50    5.40
   3 -14   8   14.10    8.00
   2 -14   8   13.20    7.90
   1 -14   8    3.00    6.00
   1 -14   8   -1.90    4.70
   0 -14   8   29.80   10.10
   0 -14   8   23.60    9.10
  -1 -14   8   17.90    8.10
  -1 -14   8   18.10    8.50
  -2 -14   8   17.80    7.40
  -2 -14   8    4.80    6.90
  -3 -14   8    4.60    6.90
  -3 -14   8    4.60    5.40
  -4 -14   8   -8.80    3.40
  -4 -14   8    0.10    6.40
  -5 -14   8   12.10    9.90
  -6 -14   8    5.00    8.00
   7 -13   8   47.40   13.10
   6 -13   8   11.60    7.70
   5 -13   8    1.30    6.60
   4 -13   8   14.50    8.60
   3 -13   8    6.30    6.60
   2 -13   8    1.70    6.50
   2 -13   8    0.60    5.60
   1 -13   8   12.40    6.90
   1 -13   8    5.70    6.20
   0 -13   8   36.20    9.60
   0 -13   8   43.20   10.40
  -1 -13   8   25.70    8.30
  -1 -13   8   24.40    9.00
  -2 -13   8    6.10    6.80
  -2 -13   8   16.30    7.40
  -3 -13   8   46.90   10.10
  -3 -13   8   59.69   13.20
  -4 -13   8   12.40    6.40
  -4 -13   8   12.30    8.30
  -5 -13   8    9.30    7.80
  -5 -13   8   -4.80    3.70
  -6 -13   8   15.90    9.60
  -7 -13   8    4.00    8.40
   8 -12   8    5.40    6.60
   7 -12   8   -0.50    6.60
   6 -12   8    6.70    6.50
   5 -12   8    0.90    6.30
   4 -12   8   -7.70    4.60
   3 -12   8   -1.40    5.10
   2 -12   8   -1.70    4.60
   2 -12   8    2.80    5.50
   1 -12   8   11.90    6.60
   1 -12   8   29.80    8.70
   0 -12   8   -2.80    4.90
   0 -12   8    4.20    6.00
  -1 -12   8    1.50    5.40
  -1 -12   8   -7.90    3.80
  -2 -12   8    4.40    5.20
  -2 -12   8   18.30    8.20
  -3 -12   8   34.40   10.30
  -3 -12   8   38.10    8.90
  -4 -12   8    4.70    6.80
  -4 -12   8   11.10    5.90
  -5 -12   8   21.60    6.60
  -5 -12   8   19.20    9.50
  -6 -12   8   45.90   12.70
  -7 -12   8    7.50    8.20
  -8 -12   8    7.50    8.30
   9 -11   8   15.10    8.30
   8 -11   8   -0.50    7.00
   7 -11   8    5.50    6.10
   6 -11   8    1.80    6.40
   5 -11   8    8.60    5.90
   4 -11   8   -0.30    5.40
   3 -11   8   24.10    6.10
   3 -11   8   12.00    6.80
   2 -11   8    9.00    4.50
   2 -11   8    4.70    5.60
   1 -11   8   37.40    8.50
   1 -11   8   24.40    8.50
   0 -11   8   53.89   10.60
   0 -11   8   53.49   10.80
  -1 -11   8   35.60    9.10
  -1 -11   8   26.60    8.30
  -2 -11   8   27.20    7.60
  -2 -11   8   49.60   10.70
  -3 -11   8   -9.10    4.00
  -3 -11   8   -3.10    3.60
  -4 -11   8    0.40    4.00
  -4 -11   8    2.80    5.50
  -5 -11   8    3.80    6.50
  -5 -11   8    4.80    4.20
  -6 -11   8    4.30    6.40
  -7 -11   8   17.80    9.00
  -8 -11   8   -6.10    5.60
  -9 -11   8   -0.50    6.80
   9 -10   8   18.80    8.30
   8 -10   8    0.30    5.90
   7 -10   8   -3.10    5.10
   6 -10   8   13.90    7.80
   5 -10   8   -2.10    4.60
   4 -10   8    7.90    5.90
   3 -10   8   19.40    5.00
   3 -10   8    8.40    6.00
   2 -10   8  117.09   12.40
   2 -10   8  105.29   14.70
   1 -10   8   76.19   10.40
   1 -10   8   70.99   11.60
   0 -10   8    9.80    5.70
   0 -10   8   -5.50    3.80
  -1 -10   8  355.06   23.00
  -1 -10   8  355.06   23.60
  -2 -10   8   80.29   13.00
  -2 -10   8   99.39   12.50
  -3 -10   8   10.30    5.00
  -3 -10   8    8.00    6.00
  -4 -10   8   46.60   10.80
  -4 -10   8   60.79    9.10
  -5 -10   8    8.40    4.20
  -5 -10   8    6.10    6.60
  -6 -10   8    7.10    4.00
  -6 -10   8    9.10    7.00
  -7 -10   8    5.10    7.10
  -8 -10   8    6.10    7.40
  -9 -10   8   -8.10    5.50
 -10 -10   8    9.50    7.20
  10  -9   8   -3.70    6.00
   9  -9   8   20.10    9.40
   8  -9   8    1.10    6.30
   7  -9   8    3.00    6.30
   6  -9   8   18.50    7.50
   5  -9   8   42.00   10.20
   4  -9   8    0.40    2.10
   4  -9   8    5.00    5.10
   3  -9   8   11.30    5.80
   3  -9   8   31.20    5.40
   2  -9   8    0.20    3.00
   2  -9   8   -2.00    3.80
   1  -9   8   78.99   11.50
   1  -9   8   83.69   10.50
   0  -9   8    0.40    3.70
   0  -9   8   -3.40    3.20
  -1  -9   8   35.30    8.50
  -1  -9   8   33.00    8.10
  -2  -9   8   -0.50    3.70
  -2  -9   8    4.40    5.30
  -3  -9   8  240.88   22.40
  -3  -9   8  216.68   15.60
  -4  -9   8   49.50    7.90
  -4  -9   8   47.80   10.80
  -5  -9   8   28.40    9.00
  -5  -9   8   45.00    7.20
  -6  -9   8   29.90    5.90
  -6  -9   8   31.00   10.20
  -7  -9   8   16.70    7.90
  -8  -9   8   15.70    8.30
  -9  -9   8    0.10    5.30
 -10  -9   8    6.00    7.60
 -11  -9   8    8.40    8.30
  11   9  -8    3.90    5.00
  11  -8   8   18.90    8.70
  10  -8   8   33.00   10.80
   9  -8   8    9.00    6.80
   8  -8   8  179.78   21.00
   7  -8   8    3.70    6.50
   6  -8   8  187.68   20.60
   5  -8   8    7.20    5.80
   4  -8   8   45.80    4.30
   4  -8   8   34.10    8.90
   3  -8   8    5.20    5.10
   3  -8   8    6.70    3.20
   2  -8   8  133.09   15.20
   2  -8   8  120.99   10.70
   1  -8   8   -2.80    2.60
   1  -8   8   -2.50    2.40
   0  -8   8  117.39   13.00
   0  -8   8  110.49   12.00
  -1  -8   8    5.60    3.80
  -1  -8   8   -1.30    3.30
  -2  -8   8   68.99   10.70
  -2  -8   8   58.09    8.60
  -3  -8   8   72.89   11.10
  -3  -8   8   81.99    9.90
  -4  -8   8    1.70    4.30
  -4  -8   8   -2.30    2.50
  -5  -8   8   15.60    7.20
  -5  -8   8   17.20    4.60
  -6  -8   8    6.80    5.90
  -6  -8   8    2.70    3.50
  -7  -8   8   -2.20    3.30
  -7  -8   8    0.20    4.00
  -8  -8   8   29.70    9.80
  -9  -8   8   15.90    8.30
   9   8  -8   28.30    7.70
 -10  -8   8   11.00    8.70
  10   8  -8    2.80    5.80
 -11  -8   8    4.00    6.90
  11   8  -8   12.60    7.50
  11  -7   8    3.50    6.10
  11  -7   8    1.30    6.20
  10  -7   8   -7.00    4.70
   9  -7   8    9.10    6.40
   8  -7   8   20.40    7.70
   7  -7   8   33.90    9.40
   6  -7   8  205.38   21.00
   5  -7   8    0.20    4.50
   4  -7   8  472.55   27.50
   3  -7   8   42.60    5.00
   3  -7   8   38.60    8.00
   2  -7   8   51.09    6.50
   2  -7   8   30.20    6.80
   1  -7   8    6.80    4.00
   1  -7   8    4.00    3.00
   0  -7   8   42.00    7.00
   0  -7   8   33.80    7.00
  -1  -7   8   16.20    5.20
  -1  -7   8   22.70    5.40
  -2  -7   8    8.10    4.70
  -2  -7   8    9.50    4.10
  -3  -7   8   28.20    5.70
  -3  -7   8   31.80    7.20
  -4  -7   8   17.60    4.40
  -4  -7   8   24.70    7.40
  -5  -7   8    2.70    2.70
  -5  -7   8    0.10    4.50
  -6  -7   8   -3.20    2.90
  -6  -7   8    2.20    5.20
  -7  -7   8   11.70    4.30
  -7  -7   8   23.70    7.80
  -8  -7   8   13.20    7.70
   8   7  -8   11.70    5.90
  -9  -7   8    0.70    6.50
   9   7  -8    1.30    4.80
 -10  -7   8   -7.30    4.70
  10   7  -8    1.80    4.90
 -11  -7   8    5.40    8.10
  11   7  -8    0.40    6.00
 -12  -7   8    1.90    7.20
  12   7  -8   -3.40    5.40
  12  -6   8   -5.30    4.90
  11  -6   8   -0.50    4.70
  11  -6   8   -2.40    5.50
  10  -6   8    8.50    6.30
  10  -6   8   24.60    8.40
   9  -6   8   15.00    6.90
   8  -6   8  192.68   20.10
   7  -6   8  154.48   17.70
   6  -6   8  132.79   15.90
   5  -6   8    3.50    4.30
   4  -6   8  216.98   16.60
   3  -6   8    0.80    1.60
   3  -6   8    0.70    3.30
  -3   6  -8    0.00    1.70
   2  -6   8   56.39    8.70
   2  -6   8   62.29    6.50
   1  -6   8  104.49   11.70
   1  -6   8   94.69    9.00
   0  -6   8   11.90    4.40
   0  -6   8   25.90    5.50
  -1  -6   8   70.79    9.30
  -1  -6   8   44.60    7.20
  -2  -6   8   -1.40    2.00
  -2  -6   8    5.70    4.00
  -3  -6   8    6.20    4.30
  -3  -6   8    5.60    3.10
  -4  -6   8   11.60    5.10
  -4  -6   8    8.40    3.40
  -5  -6   8    3.40    3.00
  -5  -6   8   -0.80    3.50
  -6  -6   8    4.80    3.40
  -6  -6   8    1.30    4.20
  -7  -6   8  104.99   15.80
  -7  -6   8  125.79   10.80
   7   6  -8   87.69   11.20
  -8  -6   8   72.19   12.80
   8   6  -8   56.89   10.10
  -9  -6   8   17.70    8.30
   9   6  -8   10.60    6.10
 -10  -6   8   -4.30    4.70
  10   6  -8    2.90    5.40
 -11  -6   8   23.50    9.50
  11   6  -8   12.70    7.10
 -12  -6   8    2.00    6.40
  12   6  -8    2.00    6.00
  12  -5   8   14.30    8.10
  12  -5   8   10.10    8.40
  11  -5   8    4.80    6.30
  11  -5   8    1.00    5.40
  10  -5   8   28.30    9.90
  10  -5   8   25.20    7.90
   9  -5   8    6.40    6.10
   9  -5   8   19.80    7.60
   8  -5   8   96.99   13.60
   7  -5   8   46.10    9.50
   6  -5   8  131.19   15.00
   5  -5   8   -1.60    3.20
   4  -5   8   47.70    8.20
   3  -5   8    5.50    2.10
   3  -5   8    6.40    3.80
  -3   5  -8    7.20    2.10
   2  -5   8  207.38   14.50
   2  -5   8  186.08   10.40
   1  -5   8  205.68   12.10
   1  -5   8  239.08   15.30
   0  -5   8   32.80    6.10
   0  -5   8   30.00    5.60
  -1  -5   8    2.30    2.80
  -1  -5   8    1.30    3.00
  -2  -5   8   18.30    4.30
  -2  -5   8   14.40    4.50
  -3  -5   8    3.10    2.50
  -3  -5   8    1.80    3.50
  -4  -5   8   -0.50    2.40
  -4  -5   8   -0.80    2.40
  -5  -5   8   72.59    8.40
  -5  -5   8   69.69   11.10
  -6  -5   8   -3.50    2.50
  -6  -5   8   -1.50    4.00
   6   5  -8   -2.20    2.70
  -7  -5   8   29.90    8.70
  -7  -5   8   40.80    6.50
   7   5  -8   41.90    7.90
  -8  -5   8    8.40    6.70
   8   5  -8    0.60    4.50
  -9  -5   8    7.30    6.30
   9   5  -8    5.90    6.00
 -10  -5   8   19.20    8.40
  10   5  -8   24.80    8.30
 -11  -5   8    7.70    7.50
  11   5  -8    6.60    6.70
 -12  -5   8   -1.20    5.80
  12   5  -8   -2.10    6.10
 -13  -5   8   -8.40    5.70
  13   5  -8   -1.80    6.50
  12  -4   8    4.60    6.80
  12  -4   8   -1.10    5.00
  11  -4   8    7.70    6.40
  11  -4   8    1.70    6.00
  10  -4   8   -6.10    4.10
  10  -4   8   -2.10    5.20
   9  -4   8  111.89   16.30
   9  -4   8  112.29   14.70
   8  -4   8    4.70    5.20
   8  -4   8    5.40    5.40
   7  -4   8    8.90    5.10
   6  -4   8   45.70    8.60
   5  -4   8   15.00    5.60
   4  -4   8   21.50    5.60
   3  -4   8   45.90    7.40
  -3   4  -8   81.69    6.10
  -3   4  -8   60.19    3.90
   2  -4   8  214.08   10.80
   2  -4   8  209.48   14.50
   1  -4   8  139.79   12.50
   1  -4   8  132.69    9.00
   0  -4   8  679.33   28.40
   0  -4   8  666.73   29.90
  -1  -4   8   97.79    9.70
  -1  -4   8   93.39    9.90
  -2  -4   8  178.28   12.80
  -2  -4   8  169.88   11.40
  -3  -4   8  152.28   14.40
  -4  -4   8   63.29    9.90
  -4  -4   8   71.59    8.50
  -5  -4   8   29.60    5.50
  -5  -4   8   28.40    7.00
   5   4  -8   28.20    5.10
  -6  -4   8   60.09    8.20
  -6  -4   8   79.29   12.20
   6   4  -8   59.79    8.00
  -7  -4   8   90.59    9.40
  -7  -4   8   73.19   12.50
   7   4  -8   86.59   10.40
  -8  -4   8  172.58   19.90
   8   4  -8  158.98   15.30
  -9  -4   8   35.40    9.60
   9   4  -8   35.30    8.60
 -10  -4   8   67.19   13.60
  10   4  -8   72.39   11.90
 -11  -4   8    6.80    6.90
  11   4  -8   -5.30    4.30
 -12  -4   8   18.80    8.60
  12   4  -8   -1.90    5.60
 -13  -4   8  -10.40    5.30
  13   4  -8   -5.60    5.20
  12  -3   8   13.20    9.20
  12  -3   8    9.30    6.20
  11  -3   8   11.60    7.40
  11  -3   8    9.60    6.10
  10  -3   8    3.80    4.40
  10  -3   8    7.90    7.10
   9  -3   8   77.89   11.30
   9  -3   8   71.59   13.30
   8  -3   8   73.89   10.90
   8  -3   8   45.50   10.50
   7  -3   8    1.80    4.00
   7  -3   8    1.70    4.40
   6  -3   8   10.00    4.70
   6  -3   8    9.30    4.40
   5  -3   8    2.50    3.00
   4  -3   8   57.49    8.50
  -4   3  -8   64.39    3.90
  -4   3  -8   57.29    4.20
   3  -3   8   -1.80    2.30
  -3   3  -8    1.50    1.20
  -3   3  -8    1.10    1.50
   2  -3   8   19.60    3.30
   2  -3   8   20.10    4.80
   1  -3   8  518.35   24.40
   1  -3   8  512.35   21.90
   0  -3   8    0.50    2.30
   0  -3   8    6.00    3.00
  -1  -3   8  579.14   25.90
  -1  -3   8  577.14   26.00
  -2  -3   8  254.87   11.60
  -2  -3   8  240.58   15.20
  -2  -3   8  293.47   15.50
  -3  -3   8   77.09   10.00
  -4  -3   8  354.66   18.40
  -4  -3   8  354.06   20.50
   4   3  -8  337.87   15.70
  -5  -3   8    8.00    3.50
  -5  -3   8    2.90    3.50
   5   3  -8    2.90    2.80
  -6  -3   8   68.09    8.40
  -6  -3   8   78.79   11.60
   6   3  -8   78.79    8.70
  -7  -3   8   -2.60    3.90
   7   3  -8    1.20    3.50
  -8  -3   8   -4.70    4.20
   8   3  -8    4.20    4.50
  -9  -3   8   26.90    9.40
   9   3  -8    9.40    5.60
 -10  -3   8    4.10    5.80
  10   3  -8    5.90    6.00
 -11  -3   8   -7.10    5.00
  11   3  -8   -3.50    4.90
 -12  -3   8    8.70    6.70
  12   3  -8   16.80    8.60
 -13  -3   8   -2.00    6.00
  13   3  -8    9.70    8.10
  13  -2   8    2.60    8.50
  12  -2   8   25.00   11.10
  12  -2   8   20.10    7.20
  11  -2   8   -5.20    5.70
  11  -2   8    3.40    4.60
  10  -2   8    6.20    7.60
  10  -2   8    7.00    4.80
   9  -2   8    3.00    4.20
   9  -2   8    0.10    5.60
   8  -2   8   99.89   12.20
   8  -2   8  100.49   14.00
  -8   2  -8  121.39    9.00
   7  -2   8   12.00    5.90
   7  -2   8    5.40    4.00
  -7   2  -8    6.10    2.70
   6  -2   8  107.39   11.50
   6  -2   8  107.29   13.20
  -6   2  -8   86.69    6.00
  -6   2  -8  101.19    6.60
   5  -2   8   39.60    7.30
   5  -2   8   51.59    7.60
  -5   2  -8   46.10    4.70
  -5   2  -8   53.69    5.00
   4  -2   8   32.10    6.00
   4  -2   8   45.80    7.20
  -4   2  -8   39.10    4.40
  -4   2  -8   35.00    3.90
   3  -2   8 1070.89   44.20
  -3   2  -8 1078.09   38.40
   2  -2   8  124.99    9.70
  -2   2  -8  119.19    6.80
   1  -2   8  642.84   28.20
   1  -2   8  634.64   25.80
   0  -2   8  175.48   11.20
   0  -2   8  139.99    9.70
  -1  -2   8  237.28   13.70
  -1  -2   8  227.68   14.00
  -2  -2   8  414.86   15.90
  -2  -2   8  407.66   20.80
  -2  -2   8  450.65   21.50
  -3  -2   8    3.90    1.60
  -3  -2   8    3.00    3.30
  -3  -2   8    6.30    3.50
  -4  -2   8   58.99    8.00
   4   2  -8   68.29    6.20
  -5  -2   8  114.49   11.50
  -5  -2   8  109.19   12.90
   5   2  -8  104.69    8.10
  -6  -2   8   24.90    7.00
  -6  -2   8   25.80    5.80
   6   2  -8   25.90    5.20
  -7  -2   8    2.20    4.00
   7   2  -8   -1.70    2.80
  -8  -2   8   49.80   10.20
   8   2  -8   48.70    8.80
  -9  -2   8   12.60    7.00
   9   2  -8    8.40    5.40
 -10  -2   8   19.90    8.00
  10   2  -8   24.50    7.90
 -11  -2   8   -1.50    5.00
  11   2  -8   -4.00    5.20
 -12  -2   8    0.10    5.70
  12   2  -8   -3.20    6.00
 -13  -2   8   18.00    8.30
  13   2  -8   12.00    7.70
  13  -1   8    3.00    6.70
  12  -1   8  -13.90    5.30
  11  -1   8   -2.00    5.40
  11  -1   8    2.40    4.30
  10  -1   8   13.90    5.70
  10  -1   8   25.80    9.70
   9  -1   8   -8.90    3.20
   9  -1   8    3.40    3.70
  -9   1  -8   -2.70    2.80
   8  -1   8   18.00    7.00
   8  -1   8   26.80    6.50
  -8   1  -8   23.00    5.00
   7  -1   8   22.30    5.70
   7  -1   8   15.80    6.10
  -7   1  -8   19.00    4.20
   6  -1   8   29.60    6.00
   6  -1   8   14.50    5.30
  -6   1  -8   18.70    3.80
   5  -1   8   94.79   11.40
   5  -1   8  129.99   12.10
  -5   1  -8  111.89    7.50
   4  -1   8  136.49   10.50
   4  -1   8  137.19   10.50
  -4   1  -8  128.29    7.60
   3  -1   8   20.70    4.90
  -3   1  -8   26.20    3.50
   2  -1   8   69.59    7.10
   2  -1   8   64.29    8.10
  -2   1  -8   70.09    5.00
   1  -1   8  121.29    7.20
   1  -1   8  113.69    7.80
   1  -1   8  130.29   10.00
   0  -1   8   50.49    6.10
   0  -1   8   54.49    7.50
   0  -1   8   56.99    3.80
  -1  -1   8   -1.40    2.30
  -1  -1   8    1.30    2.10
  -2  -1   8    9.90    4.10
  -2  -1   8    9.40    3.90
  -3  -1   8  450.85   22.50
  -3  -1   8  434.56   22.30
   3   1  -8  442.96   16.90
  -4  -1   8  863.21   37.10
   4   1  -8  811.22   31.60
  -5  -1   8  206.98   15.40
  -5  -1   8  229.48   15.10
   5   1  -8  230.58   12.60
  -6  -1   8    3.90    4.20
   6   1  -8   11.10    3.90
  -7  -1   8    3.80    4.00
   7   1  -8    2.50    3.00
  -8  -1   8   14.30    6.00
   8   1  -8   12.50    5.30
  -9  -1   8   15.40    6.60
   9   1  -8   19.00    6.20
 -10  -1   8   26.30    8.90
  10   1  -8   29.20    8.90
 -11  -1   8   50.69   11.50
  11   1  -8   57.39   11.90
 -12  -1   8   29.20   10.00
  12   1  -8   31.00   10.20
 -13  -1   8    7.50    7.40
  13   1  -8   -5.70    6.30
  13   0   8   -2.40    7.80
  12   0   8   29.90   11.10
  11   0   8   -4.80    3.90
  11   0   8    0.20    6.70
  10   0   8  102.29   16.70
  10   0   8  104.79   12.70
 -10   0  -8  113.29   12.30
   9   0   8   -2.60    5.20
   9   0   8   -4.20    3.10
  -9   0  -8   -4.90    2.90
   8   0   8  101.19   11.90
   8   0   8   87.09   14.00
  -8   0  -8  103.09   10.80
   7   0   8    0.10    4.30
   7   0   8   -1.30    2.90
  -7   0  -8   -1.70    2.40
   6   0   8    7.70    4.50
   6   0   8    8.90    3.90
  -6   0  -8    7.70    3.40
   5   0   8   -1.20    2.70
   5   0   8   -3.00    2.00
   4   0   8  459.85   23.20
   4   0   8  482.65   23.10
  -4   0  -8  446.56   19.70
   3   0   8   -2.70    1.90
   3   0   8   -0.10    1.10
  -3   0  -8    2.70    1.80
   2   0   8  141.69   12.50
   2   0   8  119.19    8.50
  -2   0  -8  133.09    7.70
   1   0   8   -0.20    1.60
   1   0   8    0.80    2.30
  -1   0  -8    1.40    1.40
   0   0   8   14.00    2.20
   0   0   8   12.20    4.00
   0   0   8   11.60    3.30
  -1   0   8   -0.90    1.90
  -1   0   8   -1.30    2.30
  -2   0   8  895.71   37.80
  -2   0   8  853.31   35.90
  -3   0   8    1.90    3.00
  -3   0   8   -3.00    2.30
   3   0  -8    0.40    1.10
  -4   0   8   72.09    9.90
  -4   0   8   57.29    8.50
   4   0  -8   61.89    5.70
  -5   0   8    3.60    4.00
   5   0  -8   -1.40    1.90
  -6   0   8   63.29   10.20
   6   0  -8   65.19    7.80
  -7   0   8   -1.50    3.20
   7   0  -8    4.30    3.40
  -8   0   8  197.58   19.40
   8   0  -8  194.48   14.60
  -9   0   8   -0.30    4.50
   9   0  -8    2.20    4.30
 -10   0   8  201.88   22.10
  10   0  -8  255.57   22.40
 -11   0   8    0.20    5.20
  11   0  -8    0.10    4.40
  11   0  -8   -2.40    4.90
 -12   0   8   11.10    7.00
  12   0  -8    9.80    7.00
 -13   0   8   -3.00    5.70
  13   0  -8   -1.70    6.20
  13   1   8  -11.00    5.90
  12   1   8   -1.10    5.90
  11   1   8    0.30    6.40
  11   1   8    3.00    4.80
  10   1   8   10.40    5.50
  10   1   8    1.10    6.70
 -10  -1  -8   15.80    6.30
   9   1   8    4.10    4.30
   9   1   8   -0.80    4.60
  -9  -1  -8    2.20    3.90
   8   1   8   27.70    8.30
   8   1   8   15.70    6.10
  -8  -1  -8   23.10    5.80
   7   1   8   24.10    6.10
   7   1   8   30.20    7.90
  -7  -1  -8    8.80    4.20
   6   1   8   15.90    4.90
   6   1   8   27.60    7.00
  -6  -1  -8   27.40    5.20
   5   1   8  114.09   11.50
   5   1   8  108.49   12.20
  -5  -1  -8  102.49    9.90
   4   1   8  125.99   12.20
   4   1   8  137.09   13.10
  -4  -1  -8  136.89    9.10
   3   1   8   17.70    4.40
   3   1   8   19.80    5.00
  -3  -1  -8   24.90    4.20
   2   1   8   82.29    7.70
   2   1   8   59.69    8.00
  -2  -1  -8   45.40    5.40
   1   1   8  121.39    7.40
   1   1   8  100.89   10.70
  -1  -1  -8  112.09    7.60
   0   1   8   38.80    6.40
   0   1   8   54.69    4.00
   0  -1  -8   49.20    5.50
   0  -1  -8   57.49    4.90
  -1   1   8    0.80    2.70
  -1   1   8    1.60    2.20
   1  -1  -8    0.10    1.10
  -2   1   8    6.00    3.30
  -2   1   8    7.50    3.90
  -3   1   8  395.96   22.10
  -3   1   8  416.46   20.80
  -4   1   8  800.52   35.20
  -5   1   8  213.88   15.10
   5  -1  -8  213.28   12.10
  -6   1   8   15.10    5.20
   6  -1  -8   20.30    4.60
  -7   1   8   10.60    5.50
   7  -1  -8    5.60    3.70
  -8   1   8   12.30    5.50
   8  -1  -8    7.30    4.10
  -9   1   8    7.70    5.90
   9  -1  -8   10.20    5.60
 -10   1   8   18.90    7.90
  10  -1  -8   17.00    7.30
 -11   1   8   64.29   12.40
  11  -1  -8   91.29   13.80
  11  -1  -8   70.79   11.60
 -12   1   8   55.89   11.70
  12  -1  -8   28.30    9.40
 -13   1   8    7.70    6.20
  13  -1  -8   -3.50    6.60
  13   2   8    3.20    8.60
  12   2   8   10.30    8.10
  11   2   8    3.50    6.60
 -11  -2  -8   -0.90    5.20
  10   2   8   -0.10    6.10
  10   2   8    4.20    5.10
 -10  -2  -8   17.50    6.00
   9   2   8    8.70    6.90
   9   2   8    3.20    4.60
  -9  -2  -8    6.40    4.60
   8   2   8   82.59   10.70
   8   2   8   88.29   14.50
  -8  -2  -8  103.59   12.40
   7   2   8   10.30    4.80
   7   2   8   18.50    6.80
  -7  -2  -8    6.80    4.20
   6   2   8  108.19   13.40
   6   2   8   90.99   10.60
  -6  -2  -8  103.99   11.00
   5   2   8   28.50    6.60
   5   2   8   40.70    7.10
  -5  -2  -8   42.00    6.70
   4   2   8   29.60    6.50
   4   2   8   27.40    5.70
   3   2   8 1054.79   42.40
   3   2   8 1010.70   43.40
  -3  -2  -8 1051.39   40.60
   2   2   8  109.19   11.50
   2   2   8  104.89    8.20
  -2  -2  -8  113.49    8.00
   1   2   8  580.24   28.30
   1   2   8  598.14   24.70
  -1  -2  -8  625.94   25.20
   0   2   8  137.99   13.00
   0  -2  -8  146.49    9.00
  -1   2   8  212.58   15.00
   1  -2  -8  236.58   12.50
   1  -2  -8  238.28   11.00
  -2   2   8  419.66   22.90
  -2   2   8  418.86   20.40
  -3   2   8   -0.20    3.10
  -4   2   8   59.09    8.70
  -5   2   8   87.39   10.40
  -6   2   8   23.90    6.40
  -7   2   8   -2.00    3.10
  -8   2   8   54.59   10.00
   8  -2  -8   46.40    8.40
  -9   2   8   11.00    6.30
   9  -2  -8   10.00    5.60
 -10   2   8   15.80    7.30
  10  -2  -8   25.50    7.90
 -11   2   8    4.10    5.70
  11  -2  -8    7.70    5.60
  11  -2  -8    4.00    5.90
 -12   2   8    7.00    5.40
  12  -2  -8    2.10    5.70
  12  -2  -8    0.10    4.50
 -13   2   8   14.30    7.00
  13  -2  -8   13.80    8.40
  12   3   8   13.70    9.70
 -12  -3  -8   18.90    7.70
  11   3   8    4.00    6.90
 -11  -3  -8   17.30    7.30
  10   3   8   -7.70    5.00
  10   3   8    3.70    4.50
 -10  -3  -8   -3.60    3.70
   9   3   8   48.60   12.10
   9   3   8   78.29   10.40
  -9  -3  -8   62.49   10.70
   8   3   8   59.09   11.90
   8   3   8   53.49    8.80
  -8  -3  -8   53.49    9.90
   7   3   8    3.40    4.20
   7   3   8    2.90    4.60
  -7  -3  -8    2.30    3.90
   6   3   8    8.40    4.50
   6   3   8   11.80    5.60
  -6  -3  -8    0.60    1.90
   5   3   8   -3.10    2.90
   5   3   8   -0.40    2.90
  -5  -3  -8   -0.60    2.10
   4   3   8   57.29    8.50
   4   3   8   61.09    9.10
  -4  -3  -8   74.59    9.00
   3   3   8   -6.30    1.80
   3   3   8   -0.30    2.70
  -3  -3  -8   -0.20    2.00
   2   3   8    8.00    3.10
   2   3   8   16.00    5.20
  -2  -3  -8   18.20    4.50
   1   3   8  501.35   26.00
   1   3   8  518.05   22.60
  -1  -3  -8  538.45   23.10
   0   3   8    3.10    3.40
   0  -3  -8    4.50    2.30
  -1   3   8  538.45   27.40
   1  -3  -8  524.05   23.00
   2  -3  -8  259.17   13.90
  -3   3   8   68.29    8.60
   3  -3  -8   55.79    6.70
  -4   3   8  359.16   19.60
  -5   3   8    1.50    3.10
  -6   3   8   71.89   10.40
  -7   3   8    1.00    3.60
  -8   3   8    1.10    3.80
  -9   3   8   16.80    6.90
   9  -3  -8   16.10    6.80
 -10   3   8    7.60    5.60
  10  -3  -8   13.50    6.40
 -11   3   8    4.70    4.90
  11  -3  -8   -1.90    4.50
  11  -3  -8    5.70    5.90
 -12   3   8   16.50    7.60
  12  -3  -8   12.40    7.60
  12  -3  -8   17.00    8.00
 -13   3   8   -0.50    3.90
  13  -3  -8    3.90    7.10
  12   4   8   -0.50    6.10
 -12  -4  -8   -0.30    6.40
  11   4   8    6.60    7.80
 -11  -4  -8    5.30    5.30
  10   4   8  -10.00    4.80
 -10  -4  -8   -0.30    4.20
   9   4   8   77.49   13.80
   9   4   8   99.79   11.80
  -9  -4  -8   91.89   14.00
   8   4   8    4.90    4.30
   8   4   8   14.00    6.70
  -8  -4  -8   -0.70    3.20
   7   4   8    6.20    5.90
   7   4   8   11.30    4.90
  -7  -4  -8   10.10    5.30
   6   4   8   28.50    6.80
   6   4   8   36.60    8.40
  -6  -4  -8   29.50    7.00
   5   4   8   16.70    5.30
   5   4   8   20.70    6.50
  -5  -4  -8   19.70    5.50
   4   4   8   19.30    5.70
   4   4   8   19.40    5.60
  -4  -4  -8   16.90    5.00
   3   4   8   75.09    9.40
   3   4   8   45.50    7.90
  -3  -4  -8   57.59    8.30
   2   4   8  204.18   15.40
   2   4   8  238.38   13.90
  -2  -4  -8  220.68   13.70
   1   4   8  135.19   13.80
  -1  -4  -8  106.39   10.30
   0  -4  -8  633.04   27.40
   1  -4  -8   81.69    8.30
   2  -4  -8  180.58   11.50
   3  -4  -8  130.09    9.40
   4  -4  -8   67.19    7.90
  -5   4   8   21.60    5.40
  -6   4   8   46.80    8.00
  -7   4   8   93.99   12.20
  -8   4   8  171.58   17.00
  -9   4   8   26.20    7.40
 -10   4   8   61.09   10.70
  10  -4  -8   66.29   12.10
 -11   4   8   -0.40    4.10
  11  -4  -8    3.90    5.80
  11  -4  -8   -5.20    5.20
 -12   4   8    2.10    4.30
  12  -4  -8   11.40    7.40
  12  -4  -8    0.70    6.30
 -13   4   8   -0.60    4.70
  13  -4  -8   -5.50    5.40
  13  -4  -8    0.90    7.00
  12   5   8    4.40    7.40
 -12  -5  -8   10.10    8.30
  11   5   8   12.20    8.70
 -11  -5  -8   -1.40    4.60
  10   5   8   21.30    9.60
 -10  -5  -8   13.10    7.00
   9   5   8   22.70    6.60
   9   5   8   26.10    9.50
  -9  -5  -8   17.80    7.50
   8   5   8  118.19   13.00
   8   5   8   77.99   13.60
  -8  -5  -8   85.89   13.20
   7   5   8   45.80   10.20
   7   5   8   47.00    8.50
  -7  -5  -8   56.39   10.80
   6   5   8  124.69   13.90
   6   5   8  153.98   17.30
  -6  -5  -8  106.69   13.70
   5   5   8   -2.20    3.70
   5   5   8   -1.00    3.30
  -5  -5  -8    4.20    3.70
   4   5   8   71.49   10.40
   4   5   8   52.99    8.90
  -4  -5  -8   63.09    9.10
   3   5   8   11.20    4.90
   3   5   8    1.20    3.30
  -3  -5  -8    5.70    3.40
  -2  -5  -8  213.48   14.30
  -1  -5  -8  198.18   13.20
   0  -5  -8   33.20    5.90
   1  -5  -8    4.80    3.30
   2  -5  -8   10.70    3.70
   3  -5  -8    5.20    2.80
   4  -5  -8   -2.00    2.10
   5  -5  -8   85.39    9.50
   6  -5  -8    1.00    3.20
  -7   5   8   45.40    8.60
  -8   5   8   -6.50    2.60
  -9   5   8   13.70    5.60
 -10   5   8    6.30    4.60
 -11   5   8    1.30    4.20
  11  -5  -8   13.40    8.40
  11  -5  -8   11.00    6.60
 -12   5   8   -5.30    3.70
  12  -5  -8    3.00    6.50
  12  -5  -8   -0.30    5.60
 -13   5   8    0.50    5.30
  13  -5  -8    7.40    7.60
  13  -5  -8    2.50    6.70
  12   6   8   -1.00    7.90
  11   6   8   -2.50    5.60
 -11  -6  -8   -1.90    4.70
  10   6   8   40.90   11.90
 -10  -6  -8   29.00    9.40
   9   6   8    0.70    5.50
  -9  -6  -8   12.10    7.20
   8   6   8  180.38   20.80
  -8  -6  -8  169.88   19.00
   7   6   8  133.69   17.00
  -7  -6  -8  125.49   16.20
   6   6   8  168.28   18.10
  -6  -6  -8  174.48   18.50
   5   6   8   -4.20    4.00
  -5  -6  -8   -1.80    3.00
   4   6   8  193.38   14.90
  -4  -6  -8  197.78   18.30
   3   6   8   -1.60    2.90
  -3  -6  -8   -0.40    2.80
  -2  -6  -8   63.19    9.30
  -1  -6  -8   86.19   10.10
   0  -6  -8   14.50    4.90
   1  -6  -8   46.70    7.20
   2  -6  -8   -0.10    2.70
   3  -6  -8    5.20    3.10
   4  -6  -8    5.90    3.30
   5  -6  -8   -2.90    2.30
   6  -6  -8    3.00    3.30
   7  -6  -8  122.19   12.30
   8  -6  -8   63.79    9.30
   9  -6  -8   14.40    5.50
  10  -6  -8   -8.10    5.40
  10  -6  -8    0.30    4.20
  11  -6  -8    0.80    4.40
  11  -6  -8    9.10    8.70
  12  -6  -8    6.80    7.70
  12  -6  -8    2.00    5.40
  12  -6  -8   -8.30    3.90
  11   7   8   -6.30    5.90
 -11  -7  -8    7.20    6.80
  10   7   8   -2.60    6.20
 -10  -7  -8    5.30    6.00
   9   7   8    4.50    6.90
  -9  -7  -8    5.30    6.60
   8   7   8   20.50    8.40
  -8  -7  -8   19.30    8.10
   7   7   8   13.20    7.80
  -7  -7  -8   36.20    9.30
   6   7   8  136.99   16.60
  -6  -7  -8  160.98   17.90
   5   7   8   -1.80    4.20
  -5  -7  -8    2.80    4.70
   4   7   8  450.55   25.50
  -4  -7  -8  455.35   26.10
  -3  -7  -8   28.50    6.60
  -2  -7  -8   41.80    8.30
  -1  -7  -8    2.80    3.40
   0  -7  -8   47.10    8.10
   1  -7  -8   14.00    5.10
   2  -7  -8    0.10    2.60
   3  -7  -8   36.40    6.70
   4  -7  -8   18.00    5.30
   5  -7  -8    6.70    3.90
   6  -7  -8    0.90    3.40
   7  -7  -8   20.90    5.60
   8  -7  -8   20.60    5.70
   9  -7  -8    4.70    4.10
  10  -7  -8    4.30    3.90
  10  -7  -8    5.30    6.60
  11  -7  -8    6.30    4.80
  11  -7  -8    9.50    8.70
  12  -7  -8    2.80    4.90
  12  -7  -8    7.30    8.30
  11   8   8   16.20    9.70
 -11  -8  -8   16.60    8.30
  10   8   8   23.90    9.70
 -10  -8  -8   30.60   10.20
   9   8   8    2.50    6.60
  -9  -8  -8   -5.00    4.20
   8   8   8  167.58   20.30
  -8  -8  -8  174.78   21.30
   7   8   8    1.70    5.30
  -7  -8  -8    3.80    5.40
   6   8   8  182.28   19.30
  -6  -8  -8  153.18   18.50
   5   8   8    1.30    5.10
  -5  -8  -8   -1.10    3.90
  -4  -8  -8   43.60    9.80
  -3  -8  -8    3.20    4.00
  -2  -8  -8   82.29   11.60
  -1  -8  -8    2.60    4.30
   0  -8  -8  140.39   14.50
   1  -8  -8   -4.00    2.10
   2  -8  -8   78.39   10.50
   3  -8  -8   91.99   11.10
   4  -8  -8   -2.60    3.10
   5  -8  -8   16.20    5.20
   6  -8  -8   10.50    4.80
   7  -8  -8    1.10    3.40
   8  -8  -8   24.70    6.60
   9  -8  -8   38.40    7.70
  10  -8  -8   10.30    8.00
  10  -8  -8    2.10    4.30
  11  -8  -8    3.60    7.10
  11  -8  -8    5.60    4.90
  12  -8  -8    3.70    5.30
  10   9   8   -3.60    5.40
 -10  -9  -8    1.60    6.20
   9   9   8   12.80    8.80
  -9  -9  -8   16.80    8.30
   8   9   8   16.20    7.80
  -8  -9  -8    8.30    7.60
   7   9   8    4.80    5.80
  -7  -9  -8    5.90    6.30
  -6  -9  -8   22.40    8.10
  -5  -9  -8   27.20    8.90
  -4  -9  -8   -4.00    3.50
  -3  -9  -8   12.80    6.30
  -2  -9  -8   -0.90    3.30
  -1  -9  -8   83.19   12.10
   0  -9  -8   -2.40    3.50
   1  -9  -8   30.50    7.50
   2  -9  -8   -0.20    3.70
   3  -9  -8  243.38   17.10
   4  -9  -8   47.80    8.50
   5  -9  -8   33.60    7.50
   6  -9  -8   28.90    6.80
   7  -9  -8   20.30    6.20
   8  -9  -8   11.40    5.50
   9  -9  -8    0.60    3.90
   9  -9  -8    7.00    8.40
  10  -9  -8   10.70    5.40
  10  -9  -8   -3.80    7.50
  11  -9  -8    3.60    8.30
  11  -9  -8    9.20    5.50
   9  10   8   14.00    8.60
  -9 -10  -8   24.10   10.40
   8  10   8    1.40    5.70
  -8 -10  -8    4.20    6.90
  -7 -10  -8    8.00    7.40
  -6 -10  -8    7.70    7.00
  -5 -10  -8   -3.60    4.00
  -4 -10  -8    2.60    5.90
  -3 -10  -8   11.50    6.80
  -2 -10  -8   72.69   12.60
  -1 -10  -8   62.89   11.30
   0 -10  -8    8.10    5.20
   1 -10  -8  294.97   20.80
   2 -10  -8   69.99   11.20
   3 -10  -8    7.00    5.10
   4 -10  -8   62.49   10.00
   5 -10  -8   14.20    5.80
   6 -10  -8   11.50    5.40
   7 -10  -8    1.30    3.90
   8 -10  -8    2.60    8.40
   8 -10  -8   17.40    6.20
   9 -10  -8   -3.20    6.50
   9 -10  -8   -0.60    4.20
  10 -10  -8    9.40    5.40
  10 -10  -8   -1.20    6.80
  -9 -11  -8    6.00    7.90
  -8 -11  -8   -0.10    5.70
  -7 -11  -8   12.20    8.20
  -6 -11  -8    3.20    6.10
  -5 -11  -8   -3.00    4.60
  -4 -11  -8   -6.40    3.30
  -3 -11  -8   28.10    9.10
  -2 -11  -8    7.40    6.20
  -1 -11  -8   33.30    8.70
   0 -11  -8   47.50   10.00
   1 -11  -8   37.20    9.30
   2 -11  -8   28.40    8.20
   3 -11  -8   -2.20    3.80
   4 -11  -8   -0.90    3.90
   5 -11  -8    9.10    5.30
   6 -11  -8    3.20    4.40
   7 -11  -8   21.20   11.20
   7 -11  -8   15.70    6.30
   8 -11  -8   -7.30    7.60
   8 -11  -8    6.50    4.70
   9 -11  -8   10.80    5.50
   9 -11  -8   -6.30    7.90
  10 -11  -8   -1.10    5.20
  -8 -12  -8   10.70    9.10
  -7 -12  -8    8.60    7.10
  -6 -12  -8    6.50    6.90
  -5 -12  -8    5.50    6.20
  -4 -12  -8    3.10    5.50
  -3 -12  -8   -3.70    4.60
  -2 -12  -8   -1.60    3.70
  -1 -12  -8   10.90    6.40
   0 -12  -8    0.60    4.30
   1 -12  -8    5.30    4.70
   2 -12  -8    8.80    6.20
   3 -12  -8   28.50    8.60
   4 -12  -8    8.60    5.70
   5 -12  -8   29.30    8.60
   6 -12  -8   23.00   12.30
   6 -12  -8   48.90   10.20
   7 -12  -8    3.90    7.50
   7 -12  -8   21.50    7.50
   8 -12  -8    4.40    9.40
   8 -12  -8   12.10    6.40
   9 -12  -8    7.60    5.90
  -7 -13  -8   15.70   10.10
  -6 -13  -8   -9.40    4.80
  -5 -13  -8  -10.40    5.20
  -4 -13  -8   -2.70    4.70
  -3 -13  -8   -6.30    3.50
  -2 -13  -8   -7.10    4.40
  -1 -13  -8   12.20    6.90
   0 -13  -8   16.10    7.50
   1 -13  -8   26.70    8.40
   2 -13  -8    5.80    5.60
   3 -13  -8   47.20   10.50
   4 -13  -8   11.10    7.10
   5 -13  -8    2.90    7.10
   5 -13  -8    2.10    5.70
   6 -13  -8   19.40    8.20
   6 -13  -8   23.30   12.50
   7 -13  -8    7.20    6.60
   7 -13  -8   12.90   10.30
   8 -13  -8    5.20    5.10
  -5 -14  -8    7.80    7.40
  -4 -14  -8    2.70    6.80
  -3 -14  -8    0.30    5.10
  -2 -14  -8   24.90   10.20
  -1 -14  -8    7.70    6.70
   0 -14  -8   28.00    9.90
   1 -14  -8   17.00    8.40
   2 -14  -8   16.20    8.00
   3 -14  -8    0.40    8.80
   3 -14  -8    6.20    5.80
   4 -14  -8   -1.40    6.50
   4 -14  -8    4.70    6.20
   5 -14  -8   16.10    7.90
   5 -14  -8   13.60   10.00
   6 -14  -8    8.20    8.10
   6 -14  -8   -5.90    5.50
  -3 -15  -8   11.40    7.60
  -3 -15  -8    4.60    8.50
  -2 -15  -8    9.90    9.60
  -2 -15  -8    9.20    7.80
  -1 -15  -8   27.20   11.30
  -1 -15  -8    9.20    7.30
   0 -15  -8   -3.90    5.40
   0 -15  -8    4.20    7.70
   1 -15  -8    3.20    6.70
   1 -15  -8   -0.90    7.10
   2 -15  -8    4.10    8.80
   2 -15  -8    1.90    6.20
   3 -15  -8   19.90   11.60
   3 -15  -8    1.10    6.40
   4 -15  -8    2.40    5.70
   4 -15  -8    7.50    9.90
   2 -15   9   10.40    8.40
   1 -15   9    8.60    7.90
   0 -15   9   13.40    8.20
   0 -15   9    4.20    7.00
  -1 -15   9    2.90    6.90
  -1 -15   9    3.50    7.60
  -2 -15   9    6.40    7.10
  -2 -15   9    8.10    9.00
  -3 -15   9    6.00    6.40
  -3 -15   9  -10.60    6.30
   4 -14   9   -2.10    5.40
   3 -14   9    3.10    6.90
   2 -14   9   15.30    8.30
   1 -14   9    1.20    6.20
   1 -14   9    5.90    6.80
   0 -14   9    7.40    6.70
   0 -14   9    9.10    7.80
  -1 -14   9   22.10    9.40
  -1 -14   9   15.10    7.60
  -2 -14   9    0.30    5.30
  -2 -14   9    4.70    7.20
  -3 -14   9   -3.80    4.50
  -3 -14   9   -5.20    6.00
  -4 -14   9    1.00    5.10
  -4 -14   9   -0.40    7.00
  -5 -14   9    8.30    9.80
   6 -13   9   -3.20    6.30
   5 -13   9    9.50    7.80
   4 -13   9   -5.60    4.30
   3 -13   9    8.60    7.50
   2 -13   9   -2.00    5.20
   1 -13   9   28.90    9.10
   1 -13   9   21.10    7.50
   0 -13   9    1.20    5.60
   0 -13   9   -3.50    4.70
  -1 -13   9   37.90   10.20
  -1 -13   9   37.00   10.20
  -2 -13   9   24.10    7.60
  -2 -13   9   25.00    9.80
  -3 -13   9   51.39   13.00
  -3 -13   9   47.60   10.50
  -4 -13   9   18.10    9.30
  -4 -13   9   -0.20    4.70
  -5 -13   9    5.80    7.10
  -5 -13   9    2.00    4.80
  -6 -13   9   -3.40    5.90
  -7 -13   9   11.50    8.50
   7 -12   9   -1.80    7.00
   6 -12   9    3.10    7.40
   5 -12   9    2.70    5.70
   4 -12   9   -5.10    3.90
   3 -12   9    4.90    6.10
   2 -12   9    6.40    5.50
   2 -12   9   -3.80    4.00
   1 -12   9   -0.20    5.20
   1 -12   9    3.30    5.10
   0 -12   9   13.10    6.70
   0 -12   9   15.10    7.00
  -1 -12   9   64.69   11.80
  -1 -12   9   63.59   12.00
  -2 -12   9   10.70    7.10
  -2 -12   9   -0.60    5.00
  -3 -12   9   -2.20    5.50
  -3 -12   9    2.70    5.00
  -4 -12   9   29.30   10.30
  -4 -12   9    9.30    5.90
  -5 -12   9   10.60    7.40
  -5 -12   9   13.60    5.50
  -6 -12   9   40.70   12.80
  -7 -12   9    4.00    7.00
  -8 -12   9    8.00    8.10
   8 -11   9   30.50   10.20
   7 -11   9    1.00    6.50
   6 -11   9   12.60    8.90
   5 -11   9    3.00    5.70
   4 -11   9   -1.00    4.70
   3 -11   9    4.50    5.80
   3 -11   9   11.30    5.00
   2 -11   9    9.30    4.70
   2 -11   9   11.10    6.20
   1 -11   9    2.80    4.60
   1 -11   9    0.10    4.50
   0 -11   9   21.70    7.50
   0 -11   9   21.50    8.30
  -1 -11   9    9.20    6.20
  -1 -11   9   16.70    7.00
  -2 -11   9   33.60    8.60
  -2 -11   9   55.09   11.40
  -3 -11   9   17.80    8.00
  -3 -11   9   21.70    6.90
  -4 -11   9   42.80   11.20
  -4 -11   9   42.20    8.40
  -5 -11   9   -2.30    3.50
  -5 -11   9    2.80    6.10
  -6 -11   9   38.50   11.20
  -7 -11   9   -1.30    6.00
  -8 -11   9    3.60    6.90
  -9 -11   9    2.40    6.80
   9 -10   9   19.80    9.50
   8 -10   9    8.50    8.50
   7 -10   9    5.30    7.00
   6 -10   9   19.80    8.70
   5 -10   9   -0.20    4.50
   4 -10   9   40.70   10.00
   3 -10   9   43.80    9.70
   3 -10   9   50.69    7.30
   2 -10   9  108.99   11.60
   2 -10   9  111.79   15.80
   1 -10   9   36.10    8.50
   1 -10   9   11.40    5.20
   0 -10   9    0.00    4.90
   0 -10   9    4.60    4.70
  -1 -10   9   87.39   12.40
  -1 -10   9  108.89   14.30
  -2 -10   9   -6.60    4.00
  -2 -10   9    0.60    4.00
  -3 -10   9    4.40    4.20
  -3 -10   9    4.90    6.10
  -4 -10   9   -1.10    3.30
  -4 -10   9    0.60    5.10
  -5 -10   9   -2.90    5.10
  -5 -10   9    1.80    3.50
  -6 -10   9    1.50    3.30
  -6 -10   9   -3.40    3.90
  -7 -10   9    0.50    6.30
  -8 -10   9    3.40    7.00
  -9 -10   9    0.60    7.40
 -10 -10   9    4.90    8.00
  10  -9   9   -2.40    5.80
   9  -9   9   23.50    9.80
   8  -9   9   48.70   11.80
   7  -9   9   28.90    9.80
   6  -9   9   62.49   12.90
   5  -9   9   43.10   10.00
   4  -9   9   76.09   12.80
   3  -9   9    4.00    4.40
   3  -9   9    1.30    3.10
   2  -9   9    9.30    4.20
   2  -9   9    7.80    5.40
   1  -9   9  146.99   16.60
   1  -9   9  123.89   13.10
   0  -9   9    3.20    4.10
   0  -9   9   12.30    5.70
  -1  -9   9   50.09    9.60
  -1  -9   9   60.29    9.90
  -2  -9   9   34.30    8.30
  -2  -9   9   21.40    6.50
  -3  -9   9   12.60    6.30
  -3  -9   9   14.80    5.40
  -4  -9   9    7.40    4.20
  -4  -9   9    9.30    5.80
  -5  -9   9   -0.30    2.90
  -5  -9   9   -1.70    4.20
  -6  -9   9    3.60    3.70
  -6  -9   9   -5.70    4.70
  -7  -9   9   11.50    7.20
  -8  -9   9    0.60    6.00
  -9  -9   9    0.50    5.60
 -10  -9   9    1.90    5.70
 -11  -9   9    6.20    8.70
  11  -8   9    2.00    6.90
  10  -8   9   -1.20    5.30
   9  -8   9   23.00    9.20
   8  -8   9   10.00    7.60
   7  -8   9   -4.10    3.60
   6  -8   9   33.30    8.90
   5  -8   9   46.70   10.80
   4  -8   9   61.29    4.90
   4  -8   9   62.59   11.10
   3  -8   9  119.49   15.20
   3  -8   9  120.19    9.50
   2  -8   9   15.50    4.50
   2  -8   9    9.70    5.70
   1  -8   9  280.77   19.80
   1  -8   9  302.17   17.50
   0  -8   9  334.47   21.20
   0  -8   9  328.87   19.60
  -1  -8   9   35.10    7.90
  -1  -8   9   43.90    8.60
  -2  -8   9   45.00    9.00
  -2  -8   9   69.39    9.90
  -3  -8   9   27.60    6.20
  -3  -8   9   32.60    8.30
  -4  -8   9   15.60    4.90
  -4  -8   9   18.50    7.40
  -5  -8   9   12.30    4.70
  -5  -8   9   18.40    7.70
  -6  -8   9   32.70    9.00
  -6  -8   9   31.70    6.50
  -7  -8   9   18.60    7.80
  -7  -8   9   17.10    5.20
  -8  -8   9   -1.70    5.70
  -9  -8   9   30.50   10.00
 -10  -8   9   -1.70    5.80
  10   8  -9   -1.00    4.50
 -11  -8   9   -5.20    6.60
  11   8  -9    2.20    5.80
  11  -7   9    3.10    6.30
  11  -7   9    9.70    6.70
  10  -7   9    2.90    6.60
  10  -7   9    5.60    6.10
   9  -7   9   -1.90    4.60
   8  -7   9   56.89   11.80
   7  -7   9   49.80   10.60
   6  -7   9   -0.40    4.10
   5  -7   9    5.70    5.70
   4  -7   9   42.40    9.10
   3  -7   9   36.40    4.90
   3  -7   9   35.40    8.50
   2  -7   9   -1.60    3.50
   2  -7   9   -0.90    2.70
   1  -7   9   78.09   10.80
   1  -7   9  107.39   10.30
   0  -7   9    5.80    4.10
   0  -7   9    3.60    3.70
  -1  -7   9   82.89   10.20
  -1  -7   9   83.79   10.80
  -2  -7   9  149.88   15.10
  -2  -7   9  153.78   13.80
  -3  -7   9   -0.90    3.60
  -3  -7   9    0.20    2.60
  -4  -7   9   10.70    3.90
  -4  -7   9    5.60    5.00
  -5  -7   9    0.50    3.30
  -5  -7   9    1.70    4.20
  -6  -7   9   -2.40    3.20
  -6  -7   9    4.00    4.90
  -7  -7   9    2.70    5.20
  -7  -7   9    2.00    3.40
  -8  -7   9    4.90    6.50
   8   7  -9   14.10    5.20
  -9  -7   9   11.10    8.50
   9   7  -9    9.20    5.90
 -10  -7   9   10.80    7.90
  10   7  -9    5.00    5.90
 -11  -7   9    7.60    7.70
  11   7  -9   -3.30    5.50
 -12  -7   9   -2.90    6.50
  12   7  -9    7.20    6.40
  11  -6   9    0.30    5.20
  11  -6   9   -2.40    5.30
  10  -6   9   -9.40    4.10
  10  -6   9    0.70    5.00
   9  -6   9   29.70    8.90
   8  -6   9    9.20    6.30
   7  -6   9  223.48   21.10
   6  -6   9    3.10    4.70
   5  -6   9   28.80    7.40
   4  -6   9   34.30    7.90
   3  -6   9    4.10    2.20
   3  -6   9   -0.90    3.50
   2  -6   9   14.50    3.80
   2  -6   9   11.60    4.50
   1  -6   9    3.60    3.10
   1  -6   9    3.50    3.70
   0  -6   9   26.80    5.90
   0  -6   9   40.10    6.70
  -1  -6   9    0.50    2.60
  -1  -6   9   -2.60    2.80
  -2  -6   9  199.18   14.80
  -2  -6   9  186.98   13.30
  -3  -6   9    4.20    4.00
  -3  -6   9    5.00    2.50
  -4  -6   9   15.80    4.90
  -4  -6   9   26.50    7.10
  -5  -6   9   33.40    8.80
  -5  -6   9   16.60    5.00
  -6  -6   9    0.00    3.00
  -6  -6   9   -2.50    3.40
  -7  -6   9   97.39   15.40
  -7  -6   9   95.89   10.20
   7   6  -9   72.19   10.20
  -8  -6   9   20.90    9.00
   8   6  -9   43.10    8.50
  -9  -6   9   38.70   10.80
   9   6  -9   26.90    7.60
 -10  -6   9    0.40    5.90
  10   6  -9   -1.10    5.10
 -11  -6   9    1.10    6.40
  11   6  -9    4.20    6.00
 -12  -6   9   -4.30    6.20
  12   6  -9   -4.50    6.00
  12  -5   9    1.60    5.40
  12  -5   9    1.80    6.70
  11  -5   9    4.70    5.70
  11  -5   9    7.10    7.10
  10  -5   9   -3.40    5.10
  10  -5   9    5.30    5.40
   9  -5   9   22.20    7.90
   9  -5   9   20.50    8.30
   8  -5   9    1.30    5.10
   8  -5   9   -3.90    4.50
   7  -5   9    8.00    5.30
   6  -5   9  164.28   17.30
   5  -5   9   83.79   11.90
   4  -5   9   51.69    9.30
   3  -5   9   29.40    3.80
   3  -5   9   17.10    5.60
  -3   5  -9   32.80    4.70
   2  -5   9   57.69    9.40
   2  -5   9   48.60    5.80
   1  -5   9    4.20    2.60
   1  -5   9    5.00    3.30
   0  -5   9   27.50    5.80
   0  -5   9   28.70    5.80
  -1  -5   9  790.62   35.00
  -1  -5   9  840.32   36.00
  -2  -5   9   55.99    7.60
  -2  -5   9   41.20    7.50
  -3  -5   9   62.79    9.70
  -4  -5   9   -4.10    2.40
  -4  -5   9   -2.90    2.50
  -5  -5   9   76.59    9.10
  -5  -5   9   79.79   11.90
  -6  -5   9   18.80    5.30
  -6  -5   9   15.70    6.70
   6   5  -9   33.40    6.30
  -7  -5   9    5.20    3.60
  -7  -5   9   -0.60    4.50
   7   5  -9    2.40    3.90
  -8  -5   9    1.80    4.80
   8   5  -9   -1.30    4.30
  -9  -5   9   42.30   10.80
   9   5  -9   36.50    8.50
 -10  -5   9   22.20    9.60
  10   5  -9   20.50    7.70
 -11  -5   9   15.50    8.70
  11   5  -9   -6.80    5.20
 -12  -5   9    1.00    6.40
  12   5  -9   -7.40    6.00
  13   5  -9    0.30    7.00
  12  -4   9    2.60    5.40
  12  -4   9   -8.60    5.80
  11  -4   9    3.40    6.70
  11  -4   9    2.00    5.10
  10  -4   9    8.70    5.80
  10  -4   9    3.60    6.20
   9  -4   9   14.50    7.60
   9  -4   9   24.20    7.70
   8  -4   9   16.40    6.90
   8  -4   9   21.90    7.20
   7  -4   9   36.90    9.50
   7  -4   9   40.20    9.00
   6  -4   9   43.80    8.40
   5  -4   9   -1.10    3.40
   4  -4   9    9.40    4.70
  -4   4  -9    5.40    2.00
  -4   4  -9    9.00    1.60
   3  -4   9   31.90    6.50
  -3   4  -9   26.90    3.20
   2  -4   9  328.27   18.30
   2  -4   9  271.77   13.60
   1  -4   9  331.67   18.60
   1  -4   9  316.77   16.00
   0  -4   9  224.78   14.60
   0  -4   9  231.78   13.70
  -1  -4   9  725.83   31.90
  -1  -4   9  734.33   32.20
  -2  -4   9    1.90    3.00
  -2  -4   9   -2.30    2.50
  -3  -4   9    9.60    3.70
  -3  -4   9   14.70    5.00
  -4  -4   9    1.50    4.00
  -4  -4   9    0.50    2.60
  -5  -4   9   18.50    5.10
  -5  -4   9   26.30    7.40
   5   4  -9   20.70    4.40
  -6  -4   9   28.10    7.50
  -6  -4   9   29.30    6.30
   6   4  -9   29.50    6.00
  -7  -4   9  263.87   23.50
  -7  -4   9  264.47   16.80
   7   4  -9  286.07   16.90
  -8  -4   9  124.09   16.90
   8   4  -9  161.58   15.40
  -9  -4   9   11.90    7.10
   9   4  -9   29.30    8.00
 -10  -4   9   14.30    8.20
  10   4  -9   19.50    7.30
 -11  -4   9   -3.10    5.70
  11   4  -9    4.20    6.20
 -12  -4   9   -3.90    5.50
  12   4  -9   13.60    7.70
 -13  -4   9   -1.70    5.50
  13   4  -9    0.70    6.70
  12  -3   9    6.20    5.80
  12  -3   9    4.20    7.20
  11  -3   9   15.60    9.30
  11  -3   9   12.10    6.40
  10  -3   9    0.30    3.90
  10  -3   9    3.50    5.50
   9  -3   9   -0.30    5.50
   9  -3   9   -1.40    4.50
   8  -3   9    5.00    5.70
   8  -3   9    3.20    4.50
   7  -3   9  128.69   15.40
   7  -3   9  122.39   13.80
   6  -3   9  120.69   14.10
   6  -3   9  134.39   13.70
   5  -3   9   32.40    6.70
   5  -3   9   39.10    7.80
  -5   3  -9   44.50    3.90
  -5   3  -9   44.90    4.10
   4  -3   9   55.39    8.20
  -4   3  -9   76.99    5.40
  -4   3  -9   67.99    4.50
   3  -3   9   11.20    4.10
  -3   3  -9   17.30    2.70
   2  -3   9   -2.30    2.40
   2  -3   9    1.00    1.80
   1  -3   9    6.00    3.00
   1  -3   9    3.50    3.00
   0  -3   9   82.49    9.60
   0  -3   9   84.39    8.70
  -1  -3   9   82.89    9.30
  -1  -3   9   85.69    9.90
  -2  -3   9  129.09   12.30
  -2  -3   9  113.69    6.40
  -2  -3   9  110.69   11.10
  -3  -3   9  462.95   19.50
  -3  -3   9  479.15   23.70
  -3  -3   9  521.15   25.40
  -4  -3   9  135.89   12.60
  -4  -3   9  108.29   12.40
  -5  -3   9   53.89    9.10
  -5  -3   9   45.70    7.80
   5   3  -9   51.49    6.30
  -6  -3   9  168.18   13.10
  -6  -3   9  208.68   19.30
   6   3  -9  159.38   11.50
  -7  -3   9   -4.90    3.50
   7   3  -9    8.60    4.20
  -8  -3   9    3.40    5.60
   8   3  -9    3.80    4.40
  -9  -3   9   89.49   15.10
   9   3  -9   88.19   11.80
 -10  -3   9   71.69   14.20
  10   3  -9   50.09    9.80
 -11  -3   9   19.80    8.50
  11   3  -9   36.80    9.30
 -12  -3   9   -5.10    5.70
  12   3  -9   -3.90    4.90
 -13  -3   9   27.90   10.30
  13   3  -9   27.80    9.80
  12  -2   9    2.50    5.50
  12  -2   9   -2.30    7.30
  11  -2   9   21.70    9.10
  11  -2   9   19.70    7.30
  10  -2   9   13.60    5.60
  10  -2   9    5.30    6.90
   9  -2   9   38.70    8.40
   9  -2   9   40.50   10.40
   8  -2   9    6.50    5.40
   8  -2   9   19.10    6.50
  -8   2  -9   14.70    3.70
   7  -2   9   36.00    7.70
   7  -2   9   19.30    6.80
  -7   2  -9   43.50    5.10
   6  -2   9  362.46   21.20
   6  -2   9  363.16   22.20
  -6   2  -9  364.06   15.90
   5  -2   9   -2.00    2.30
   5  -2   9    5.80    3.80
  -5   2  -9    5.00    2.10
   4  -2   9   13.70    4.30
   4  -2   9    3.90    3.10
  -4   2  -9    7.30    2.10
   3  -2   9   24.10    5.00
   3  -2   9   19.50    4.90
  -3   2  -9   24.50    3.30
   2  -2   9  466.75   21.50
   2  -2   9  529.65   24.20
  -2   2  -9  468.45   19.50
   1  -2   9 1507.35   55.29
   1  -2   9 1504.85   59.29
   0  -2   9  128.89   10.80
   0  -2   9  124.19   11.50
  -1  -2   9  260.37   15.50
  -1  -2   9  237.88   14.60
  -2  -2   9  152.58   13.70
  -2  -2   9  171.58   14.70
  -3  -2   9   25.50    5.80
  -3  -2   9   30.60    3.00
  -3  -2   9   39.50    7.70
  -4  -2   9    6.30    4.40
  -4  -2   9    0.50    1.70
   4   2  -9    7.60    2.40
  -5  -2   9  101.39   12.50
  -5  -2   9  101.59   11.30
   5   2  -9   99.29    7.60
  -6  -2   9   17.10    5.30
  -6  -2   9   17.30    6.70
   6   2  -9   18.60    4.60
  -7  -2   9   50.69   10.50
   7   2  -9   44.70    7.20
  -8  -2   9   -2.50    4.00
   8   2  -9    2.20    3.90
  -9  -2   9  140.49   17.70
   9   2  -9  131.29   14.40
 -10  -2   9   -5.60    5.00
  10   2  -9   -0.20    4.40
 -11  -2   9   15.70    8.60
  11   2  -9   14.60    7.00
 -12  -2   9   10.10    6.70
  12   2  -9   -2.30    4.90
 -13  -2   9    2.10    6.90
  13   2  -9    1.40    6.30
  12  -1   9    2.70    8.40
  11  -1   9   -5.20    4.40
  11  -1   9   -7.60    4.90
  10  -1   9   21.80    6.90
  10  -1   9    1.80    6.00
   9  -1   9  206.18   15.80
   9  -1   9  174.38   20.90
  -9   1  -9  196.68   14.10
   8  -1   9   51.69   11.40
   8  -1   9   69.79   10.30
  -8   1  -9   74.39    8.30
   7  -1   9  117.69   12.30
   7  -1   9   96.89   13.40
  -7   1  -9  123.19    9.10
   6  -1   9  118.69   14.40
   6  -1   9  122.49   12.70
  -6   1  -9  112.29    9.70
   5  -1   9   35.20    6.50
   5  -1   9   45.40    8.20
  -5   1  -9   30.90    4.70
   4  -1   9   25.20    5.80
   4  -1   9   35.10    6.40
  -4   1  -9   31.80    4.40
   3  -1   9   -0.60    2.70
   3  -1   9    1.80    2.40
  -3   1  -9    3.50    2.00
   2  -1   9   55.49    8.10
   2  -1   9   43.80    5.90
  -2   1  -9   44.10    4.90
   1  -1   9   48.10    7.50
   1  -1   9   43.70    5.70
   1  -1   9   45.10    5.10
   0  -1   9   68.79    9.00
   0  -1   9   55.09    4.10
   0  -1   9   68.89    7.60
  -1  -1   9  406.16   19.40
  -1  -1   9  348.37   19.80
  -2  -1   9   26.90    5.70
  -3  -1   9    4.10    3.30
  -3  -1   9    6.70    3.80
   3   1  -9    0.90    1.00
  -4  -1   9   79.89   10.70
  -4  -1   9  104.39   11.80
   4   1  -9   96.79    6.10
  -5  -1   9   -2.10    2.90
  -5  -1   9    1.70    3.40
   5   1  -9    1.60    2.40
  -6  -1   9   40.90    8.60
   6   1  -9   24.10    5.10
  -7  -1   9    2.10    4.80
   7   1  -9    0.00    3.30
  -8  -1   9   12.40    6.70
   8   1  -9   18.00    5.90
  -9  -1   9    6.80    5.90
   9   1  -9   20.90    7.20
 -10  -1   9   89.39   15.40
  10   1  -9   58.79   11.30
 -11  -1   9   -2.10    5.20
  11   1  -9    0.20    5.30
 -12  -1   9    0.40    6.00
  12   1  -9    2.00    7.20
 -13  -1   9    1.90    5.70
  13   1  -9   -3.80    6.60
  12   0   9   19.70   10.40
  11   0   9   51.89   13.10
  11   0   9   38.90    9.20
  10   0   9    2.60    5.80
  10   0   9   -1.90    3.90
   9   0   9   33.30    7.90
   9   0   9   32.60   10.30
  -9   0  -9   47.50    7.90
   8   0   9    3.80    4.30
   8   0   9   -5.20    4.40
  -8   0  -9    2.70    3.30
   7   0   9   -2.60    3.40
   7   0   9   -4.70    3.00
  -7   0  -9    1.30    3.20
   6   0   9   -4.00    2.30
   6   0   9   -0.70    3.40
  -6   0  -9    0.50    2.30
   5   0   9  108.19   12.20
   5   0   9  108.59   11.60
  -5   0  -9  103.09    7.80
   4   0   9    1.00    3.10
   4   0   9    2.30    3.20
  -4   0  -9   -1.40    1.60
   3   0   9   45.90    6.90
   3   0   9   57.09    8.30
  -3   0  -9   48.90    5.70
   2   0   9   -3.50    2.40
   2   0   9    0.10    2.10
  -2   0  -9   -1.10    1.40
   1   0   9   77.89    5.80
   1   0   9   70.59    9.10
  -1   0  -9   63.69    6.40
   0   0   9   -0.60    2.00
   0   0   9    0.70    3.20
   0   0   9    3.10    1.60
  -1   0   9  905.01   40.10
  -1   0   9  954.70   38.00
  -2   0   9    4.20    3.60
  -2   0   9   -3.60    1.80
  -3   0   9   63.19    8.90
  -3   0   9   42.90    7.60
   3   0  -9   48.40    3.40
  -4   0   9    0.60    2.80
  -4   0   9    0.00    3.30
   4   0  -9    0.10    1.50
  -5   0   9  705.23   33.10
   5   0  -9  642.64   27.20
  -6   0   9    0.00    3.60
   6   0  -9   -0.20    2.50
  -7   0   9   92.19   13.10
   7   0  -9   72.49    9.00
  -8   0   9    7.20    5.90
   8   0  -9   -0.40    3.40
  -9   0   9  315.77   23.00
   9   0  -9  332.67   21.00
 -10   0   9   16.70    7.60
  10   0  -9   -2.60    4.50
 -11   0   9  125.69   18.50
  11   0  -9  115.49   15.60
 -12   0   9   -0.40    5.60
  12   0  -9    0.40    6.10
 -13   0   9    5.60    5.90
  13   0  -9   -5.30    5.80
  12   1   9   -3.50    7.10
  11   1   9   -3.30    5.00
  11   1   9   -3.80    5.90
  10   1   9   15.60    8.60
  10   1   9   16.90    6.40
 -10  -1  -9   10.60    5.40
   9   1   9  209.98   18.40
   9   1   9  179.58   21.10
  -9  -1  -9  202.18   14.80
   8   1   9   54.19   11.30
   8   1   9   73.29   10.60
  -8  -1  -9   69.29   10.00
   7   1   9  128.89   16.40
   7   1   9  133.29   13.70
  -7  -1  -9  119.29   12.30
   6   1   9   90.09   11.00
   6   1   9  119.99   14.00
  -6  -1  -9   89.69   10.00
   5   1   9   30.10    7.20
   5   1   9   30.30    6.60
  -5  -1  -9   27.30    5.10
   4   1   9   37.20    7.10
   4   1   9   34.40    7.00
  -4  -1  -9   34.30    5.40
   3   1   9   -0.50    1.70
   3   1   9    6.60    3.80
  -3  -1  -9    2.60    2.30
   2   1   9   43.80    5.90
   2   1   9   39.40    7.10
  -2  -1  -9   34.40    4.80
   1   1   9   43.60    7.80
   1   1   9   47.80    5.40
  -1  -1  -9   58.49    6.40
   0   1   9   62.39    5.30
   0   1   9   58.29    8.40
   0  -1  -9   69.19    5.60
   0  -1  -9   70.89    7.40
  -1   1   9  362.06   20.50
  -1   1   9  341.67   17.80
   1  -1  -9  356.56   14.00
  -2   1   9   26.70    5.40
  -2   1   9   19.50    5.50
   2  -1  -9   28.70    2.60
  -3   1   9    6.70    3.70
  -3   1   9   -0.20    3.30
  -4   1   9   77.29    9.90
  -4   1   9   79.19   10.50
  -5   1   9   -4.50    2.80
   5  -1  -9   -1.90    1.80
  -6   1   9   25.10    6.70
   6  -1  -9   27.50    5.30
  -7   1   9   10.40    5.60
   7  -1  -9    6.60    3.80
  -8   1   9   18.20    6.60
   8  -1  -9   22.60    5.90
  -9   1   9   -1.00    4.80
   9  -1  -9    7.90    4.90
 -10   1   9   87.09   14.50
  10  -1  -9   73.79   12.20
 -11   1   9    4.50    5.40
  11  -1  -9    2.20    6.40
 -12   1   9   20.20    7.80
  12  -1  -9   -1.10    6.30
 -13   1   9    3.60    5.90
  13  -1  -9   -1.00    5.90
  12   2   9    0.20    7.60
  11   2   9   36.20   11.30
 -11  -2  -9   17.50    7.50
  10   2   9   -0.50    4.60
  10   2   9    9.60    8.40
 -10  -2  -9    9.30    5.90
   9   2   9   35.80   10.40
   9   2   9   21.60    7.10
  -9  -2  -9   36.80    8.30
   8   2   9    3.50    6.20
   8   2   9   12.70    5.80
  -8  -2  -9   16.80    5.60
   7   2   9   23.40    6.80
   7   2   9   27.80    8.20
  -7  -2  -9   32.60    6.80
   6   2   9  312.47   21.30
   6   2   9  356.56   20.50
  -6  -2  -9  351.46   19.20
   5   2   9   -1.20    3.00
   5   2   9    2.70    3.50
  -5  -2  -9    4.00    2.90
   4   2   9    3.40    3.40
   4   2   9   11.10    4.30
  -4  -2  -9   -0.50    1.50
   3   2   9   20.20    5.40
   3   2   9    9.50    3.40
  -3  -2  -9   23.40    4.70
   2   2   9  455.05   21.30
   2   2   9  477.75   24.60
  -2  -2  -9  459.05   21.00
   1   2   9 1502.45   55.69
   1   2   9 1504.85   60.99
  -1  -2  -9 1509.65   55.59
   0   2   9  148.49   14.30
   0  -2  -9  128.49    8.80
  -1   2   9  256.37   17.10
   1  -2  -9  263.77   14.00
  -2   2   9  157.98   11.20
  -2   2   9  126.79   13.50
  -3   2   9   26.20    7.10
  -3   2   9   32.20    6.10
  -4   2   9   11.30    5.00
  -5   2   9   90.79   11.50
  -6   2   9   24.70    6.50
  -7   2   9   40.30    8.30
   7  -2  -9   57.29    8.40
  -8   2   9    2.20    4.20
   8  -2  -9    1.90    3.60
  -9   2   9  167.48   18.60
   9  -2  -9  158.08   16.40
 -10   2   9    3.10    5.10
  10  -2  -9    3.30    5.00
 -11   2   9   13.60    7.10
  11  -2  -9    2.80    6.00
 -12   2   9    6.20    5.80
  12  -2  -9    0.70    5.80
  12  -2  -9   -3.40    5.30
 -13   2   9    1.30    5.50
  13  -2  -9   -3.70    5.80
  12   3   9   10.00    8.60
  11   3   9   18.00    9.30
 -11  -3  -9    9.40    6.30
  10   3   9    7.70    6.90
  10   3   9    0.00    4.60
 -10  -3  -9   -0.20    4.20
   9   3   9    3.00    4.90
   9   3   9    3.80    6.20
  -9  -3  -9    1.50    4.50
   8   3   9    6.50    5.20
   8   3   9    0.00    5.40
  -8  -3  -9   -2.00    3.60
   7   3   9  143.59   14.40
   7   3   9  124.39   16.10
  -7  -3  -9  106.19   13.20
   6   3   9  114.69   14.30
   6   3   9  131.29   14.10
   5   3   9   32.30    7.50
   5   3   9   37.40    7.60
  -5  -3  -9   27.90    6.20
   4   3   9   57.49    9.20
   4   3   9   92.79   11.10
  -4  -3  -9   70.39    8.60
   3   3   9   15.70    5.00
   3   3   9   15.10    4.60
  -3  -3  -9   15.00    4.30
   2   3   9    0.80    3.60
   2   3   9    0.30    2.10
  -2  -3  -9    2.00    2.70
   1   3   9    6.30    2.90
   1   3   9    9.10    4.80
  -1  -3  -9    7.00    3.40
   0   3   9   57.19    9.30
   0  -3  -9   67.89    7.70
  -1   3   9   83.39   11.10
   1  -3  -9   89.19    8.90
   2  -3  -9  113.19   10.20
  -3   3   9  478.05   23.70
   3  -3  -9  467.65   22.20
  -4   3   9  110.59   11.50
  -5   3   9   55.29    9.10
  -6   3   9  141.49   14.50
  -7   3   9    0.30    3.60
  -8   3   9    0.50    4.40
  -9   3   9   81.29   13.10
   9  -3  -9   88.09   12.50
 -10   3   9   58.69   11.40
  10  -3  -9   78.99   12.30
 -11   3   9   42.60   10.00
  11  -3  -9   31.50    9.10
 -12   3   9    4.80    6.30
  12  -3  -9   -1.50    5.60
  12  -3  -9    1.40    5.20
 -13   3   9   15.00    8.10
  13  -3  -9   24.80   10.00
  12   4   9    5.00    7.70
 -12  -4  -9   -4.80    6.00
  11   4   9    8.20    7.20
 -11  -4  -9   -3.20    4.80
  10   4   9   -1.50    5.40
 -10  -4  -9    6.70    5.30
   9   4   9   21.00    6.80
   9   4   9   13.30    7.80
  -9  -4  -9   23.60    8.20
   8   4   9   17.30    8.00
   8   4   9   22.40    7.00
   7   4   9   25.40    6.90
   7   4   9   38.60    9.40
  -7  -4  -9   53.29   10.00
   6   4   9   41.40    8.70
   6   4   9   54.59   10.00
  -6  -4  -9   50.99    9.10
   5   4   9    3.80    4.20
   5   4   9    0.50    3.60
  -5  -4  -9   -1.40    2.80
   4   4   9    3.00    4.20
   4   4   9    2.40    3.60
  -4  -4  -9   11.50    4.30
   3   4   9   27.60    6.00
   3   4   9   32.40    7.50
  -3  -4  -9   24.60    5.60
   2   4   9  249.58   14.80
   2   4   9  287.47   18.50
  -2  -4  -9  256.87   15.40
   1   4   9  308.07   20.50
  -1  -4  -9  339.57   17.60
   0   4   9  200.58   18.40
   0  -4  -9  193.28   12.30
   1  -4  -9  749.82   31.80
   2  -4  -9    2.90    2.40
   3  -4  -9    6.80    3.00
   4  -4  -9    9.70    3.90
  -5   4   9   11.30    4.70
  -6   4   9   37.80    7.70
  -7   4   9  266.87   18.40
  -8   4   9  132.89   15.00
  -9   4   9   34.20    8.60
 -10   4   9   22.10    8.00
  10  -4  -9   18.90    7.40
 -11   4   9    4.20    5.90
  11  -4  -9    3.80    5.40
 -12   4   9    3.50    5.50
  12  -4  -9    3.50    6.50
  12  -4  -9   -1.00    5.60
 -13   4   9    0.10    4.20
  13  -4  -9   -4.90    5.80
  13  -4  -9    2.30    5.70
  12   5   9   -0.80    6.80
  11   5   9    0.00    6.10
 -11  -5  -9    0.30    5.30
  10   5   9   -3.10    5.80
 -10  -5  -9    4.70    3.80
   9   5   9   32.30    8.00
   9   5   9   24.50    9.70
  -9  -5  -9   29.00    9.20
   8   5   9   -2.30    4.20
   8   5   9    3.40    6.50
  -8  -5  -9    0.10    4.60
   7   5   9   -0.10    5.50
   7   5   9    3.20    4.70
  -7  -5  -9    0.60    4.50
   6   5   9  116.99   14.80
   6   5   9  153.28   15.90
  -6  -5  -9  118.79   14.30
   5   5   9   81.49   11.80
   5   5   9   86.99   12.40
  -5  -5  -9   93.09   12.30
   4   5   9   51.49    8.90
   4   5   9   51.09    9.40
  -4  -5  -9   76.89   10.70
   3   5   9   24.00    6.90
   3   5   9   29.20    6.70
  -3  -5  -9   35.00    7.10
   2   5   9   52.69    9.70
  -2  -5  -9   43.80    7.40
  -1  -5  -9    7.60    3.80
   0  -5  -9   24.30    5.10
   1  -5  -9  802.12   34.20
   2  -5  -9   38.00    6.50
   3  -5  -9   61.49    8.00
   4  -5  -9   -1.90    2.10
   5  -5  -9   62.79    8.30
   6  -5  -9   15.30    4.90
  -7   5   9    1.70    4.10
   7  -5  -9   -1.00    3.30
  -8   5   9    1.00    4.50
  -9   5   9   35.10    8.40
 -10   5   9   11.50    6.20
 -11   5   9    1.10    5.70
  11  -5  -9   10.30    6.90
  11  -5  -9   12.90    8.60
 -12   5   9   -4.70    3.30
  12  -5  -9    5.30    7.30
  12  -5  -9    3.10    7.50
  13  -5  -9    0.60    7.00
  11   6   9   -9.00    4.90
 -11  -6  -9    6.60    6.60
  10   6   9    4.30    7.10
 -10  -6  -9    6.50    5.40
   9   6   9   37.10   11.00
  -9  -6  -9   21.10    8.60
   8   6   9    1.70    6.00
  -8  -6  -9    4.20    5.20
   7   6   9  205.28   21.30
  -7  -6  -9  214.98   21.40
   6   6   9   -2.70    3.60
  -6  -6  -9    9.60    5.10
   5   6   9   23.70    7.80
  -5  -6  -9   42.10    8.70
   4   6   9   45.60    8.60
  -4  -6  -9   51.99    8.90
   3   6   9    5.10    3.60
  -3  -6  -9    6.80    4.20
  -2  -6  -9    8.20    4.60
  -1  -6  -9    1.60    2.80
   0  -6  -9   34.00    6.20
   1  -6  -9    4.90    3.30
   2  -6  -9  187.28   13.10
   3  -6  -9   11.40    4.30
   4  -6  -9   22.10    5.40
   5  -6  -9   26.50    6.20
   6  -6  -9   -4.40    2.50
   7  -6  -9   89.09   10.70
   8  -6  -9   49.80    8.50
   9  -6  -9   19.10    6.20
  10  -6  -9   -4.50    3.90
  11  -6  -9   13.90    7.80
  11  -6  -9    5.40    5.30
  12  -6  -9    7.60    6.80
  12  -6  -9    1.50    7.00
  12  -6  -9   -0.90    5.20
  11   7   9   -3.80    5.80
 -11  -7  -9   -0.20    5.70
  10   7   9    8.00    6.80
 -10  -7  -9   16.90    8.70
   9   7   9    6.10    6.80
  -9  -7  -9    3.80    6.00
   8   7   9   52.59   11.80
  -8  -7  -9   62.39   12.60
   7   7   9   43.20   10.20
  -7  -7  -9   51.49   11.20
   6   7   9   -1.00    4.20
  -6  -7  -9   10.20    5.70
[truncated: 275,485 more chars]
